# Supplementary material for: Facile approach to multifunctionalized 5-alkylidene-3-pyrrolin-2-ones via regioselective oxidative cyclization of 2,4-pentanediones with primary amines and sodium sulfinates
Source: Royal Society of Chemistry journal article supplement (doi:10.1039/d2qo00473a), 2022-01-01
Supplement: d2qo00473a1.pdf [file d2qo00473a1.pdf]

# Facile approach to multifunctionalized 5-alkylidene-3-pyrrolin-2-ones via regioselective oxidative cyclization of 2,4-pentanediones with primary amines and sodium sulfinates

Donghan Liu,<sup>a</sup> Xihang Lu,<sup>a</sup> Qiaohu Zhang,<sup>a</sup> Yuxuan Zhao,<sup>a</sup> Biao Zhang,<sup>a</sup> Yulin Sun,<sup>a</sup> Weifeng

Dai,<sup>a</sup> Yu Xu,<sup>b</sup> and Fuchao Yu<sup>a,\*</sup>

<sup>a</sup>Faculty of Life Science and Technology, Kunming University of Science and Technology, Kunming, 650504, P. R. China.

<sup>b</sup>School of nursing, Xi'an Innovation College of Yan'an University, Xi'an, 710100, P. R. China.

## Supporting Information

### Table of Contents

|                                                                                          |     |
|------------------------------------------------------------------------------------------|-----|
| 1. General information. ....                                                             | 2   |
| 2. Optimization of reaction conditions. ....                                             | 4   |
| 3. General procedure. ....                                                               | 5   |
| 4. Confirmation of <i>Z/E</i> configuration of compound <b>7c</b> . ....                 | 6   |
| 5. Spectroscopic data. ....                                                              | 8   |
| 6. X-ray Structure and Data <sup>3</sup> of <b>4a</b> (CCDC 2145010). ....               | 32  |
| 7. <sup>1</sup> H NMR, <sup>13</sup> C NMR and HRMS spectra for spectroscopic data. .... | 33  |
| 8. References and notes. ....                                                            | 141 |

## 1. General information.

All compounds were fully characterized by spectroscopic data. The NMR spectra were recorded on a DRX600 ( $^1\text{H}$ : 600 MHz,  $^{13}\text{C}$ : 150 MHz), chemical shifts ( $\delta$ ) are expressed in ppm, and  $J$  values are given in Hz, and deuterated  $\text{CDCl}_3$  and  $\text{DMSO}-d_6$  were used as solvent. The reactions were monitored by thin layer chromatography (TLC) using silica gel  $\text{GF}_{254}$ . The melting points were determined on XT-4A melting point apparatus and are uncorrected. HRMS were performed on an Agilent LC/MS TOF instrument.

All chemicals and solvents were used as received without further purification unless otherwise stated. Column chromatography was performed on silica gel (200–300 mesh).

2,4-Pentanediones **1i-1o** were prepared according to the literature<sup>1</sup>.  $N$ -((2*Z*,4*E*)-4-(phenylimino)pent-2-en-2-yl)aniline **13** were prepared according to the literature<sup>2</sup>. 2,4-Pentanediones **1a-1h** and **1p**, primary amines **2**, sodium sulfinates **3**, oxidants, iodine reagents and acids were purchased from Energy Chemical and Adamas-beta®. The specific substrate structure is as follows:

Substrate of 2,4-pentanediones **1**:

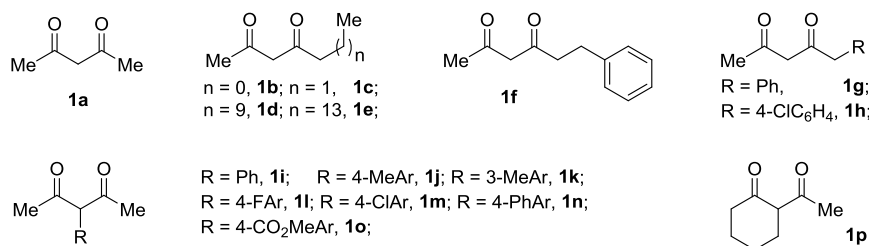

Substrate of primary amines **2**:

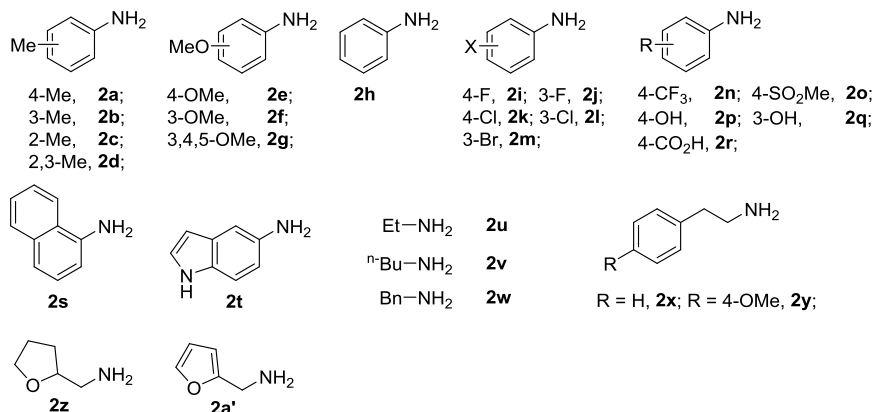

Substrate of sodium sulfinates **3**:

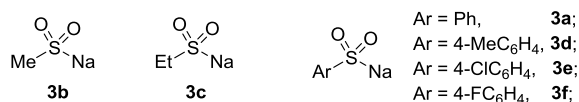

Abbreviations:

TBHP: *tert*-butyl hydroperoxide; BPO: dibenzoyl peroxide; TBPB: *tert*-butyl peroxybenzoate;  
CHP: cumene hydroperoxide; DMSO: dimethyl sulfoxide; DMF: *N,N*-dimethylformamide;  
THF: tetrahydrofuran; PE: petroleum ether; EA: ethyl acetate;  
DCM: dichloromethane; MTBE: methyl *tert*-butyl ether;

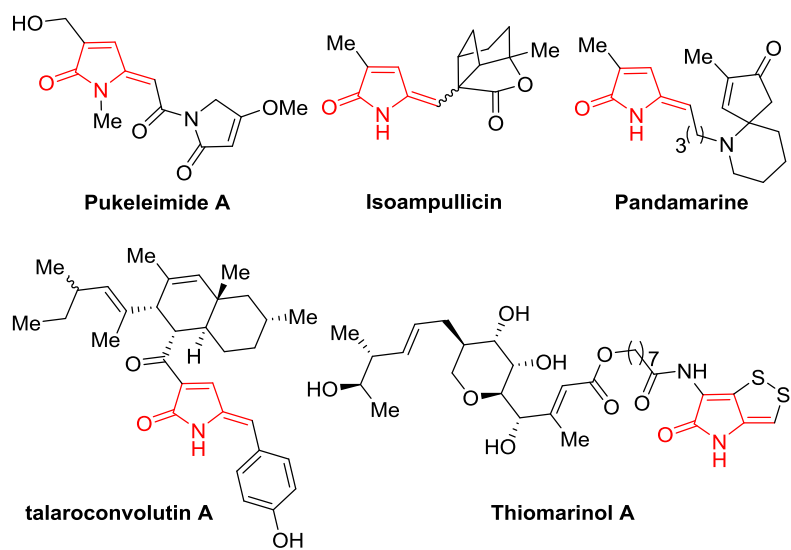

**Figure S1** Representative examples of biologically active molecules with a 5-alkylidene-3-pyrrolin-2-one core

## 2. Optimization of reaction conditions.

**Table S1** Optimization of reaction conditions

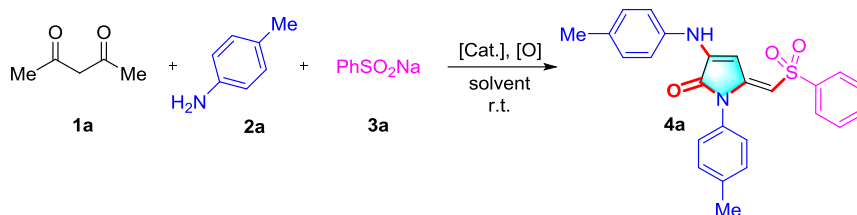

| Entry           | Oxidant (eq.)                                      | Catalyst (mol%)                    | Solvent (v/v = 1/1)                 | Time (h) | Yield (%)         |
|-----------------|----------------------------------------------------|------------------------------------|-------------------------------------|----------|-------------------|
| 1               | TBHP (2.0)                                         | KI (40)                            | DMSO/HCO <sub>2</sub> H             | 12       | 57                |
| 2               | TBHP (2.0)                                         | KI (40)                            | DMSO/TFA                            | 18       | n.d. <sup>g</sup> |
| 3               | TBHP (2.0)                                         | KI (40)                            | DMSO/HCl                            | 18       | n.d.              |
| 4               | TBHP (2.0)                                         | KI (40)                            | DMSO/TSOH                           | 18       | trace             |
| 5               | TBHP (2.0)                                         | KI (40)                            | DMSO/EtCO <sub>2</sub> H            | 15       | 37                |
| 6               | TBHP (2.0)                                         | KI (40)                            | DMSO/H <sub>2</sub> SO <sub>4</sub> | 12       | n.d.              |
| 7               | TBHP (2.0)                                         | KI (40)                            | DMSO/HNO <sub>3</sub>               | 12       | n.d.              |
| 8               | TBHP (2.0)                                         | KI (40)                            | DMSO/AcOH                           | 12       | 62                |
| 9 <sup>d</sup>  | TBHP (2.0)                                         | KI (40)                            | DMSO/AcOH                           | 12       | 59                |
| 10 <sup>e</sup> | TBHP (2.0)                                         | KI (40)                            | DMSO/AcOH                           | 12       | 60                |
| 11              | TBHP (2.0)                                         | I <sub>2</sub> (40)                | DMSO/AcOH                           | 12       | 60                |
| 12              | TBHP (2.0)                                         | LiI (40)                           | DMSO/AcOH                           | 12       | 59                |
| 13              | TBHP (2.0)                                         | NH <sub>4</sub> I (40)             | DMSO/AcOH                           | 12       | 50                |
| 14              | TBHP (2.0)                                         | CuI (40)                           | DMSO/AcOH                           | 12       | 37                |
| 15              | TBHP (2.0)                                         | I <sub>2</sub> O <sub>5</sub> (40) | DMSO/AcOH                           | 12       | 34                |
| 16              | TBHP (2.0)                                         | NaI (40)                           | DMSO/AcOH                           | 12       | 53                |
| 17 <sup>f</sup> | TBHP (2.0)                                         | KI (40)                            | DMSO/AcOH                           | 12       | 60                |
| 18              | DTBP (2.0)                                         | KI (40)                            | DMSO/AcOH                           | 23       | trace             |
| 19              | BPO (2.0)                                          | KI (40)                            | DMSO/AcOH                           | 12       | 58                |
| 20              | TBPP (2.0)                                         | KI (40)                            | DMSO/AcOH                           | 12       | 33                |
| 21              | CHP (2.0)                                          | KI (40)                            | DMSO/AcOH                           | 12       | 45                |
| 22              | K <sub>2</sub> S <sub>2</sub> O <sub>8</sub> (2.0) | KI (40)                            | DMSO/AcOH                           | 18       | trace             |
| 23              | Oxone (2.0)                                        | KI (40)                            | DMSO/AcOH                           | 18       | trace             |
| 24              | TBHP (2.0)                                         | KI (40)                            | Cyclohexane /AcOH                   | 12       | 49                |
| 25              | TBHP (2.0)                                         | KI (40)                            | 1,4-dioxane/AcOH                    | 13       | 50                |
| 26              | TBHP (2.0)                                         | KI (40)                            | THF/AcOH                            | 15       | 52                |
| 27              | TBHP (2.0)                                         | KI (40)                            | Toluene/AcOH                        | 12       | 55                |
| 28              | TBHP (2.0)                                         | KI (40)                            | PE/AcOH                             | 12       | 36                |
| 29              | TBHP (2.0)                                         | KI (40)                            | EA/AcOH                             | 12       | 58                |
| 30              | TBHP (2.0)                                         | KI (40)                            | DCM/AcOH                            | 12       | 60                |
| 31              | TBHP (2.0)                                         | KI (40)                            | Water/AcOH                          | 12       | n.r. <sup>h</sup> |
| 32              | TBHP (2.0)                                         | KI (40)                            | MeCN/AcOH                           | 12       | 40                |
| 33              | TBHP (2.0)                                         | KI (40)                            | DMF/AcOH                            | 12       | 58                |
| 34              | TBHP (2.0)                                         | KI (40)                            | MTBE/AcOH                           | 12       | 62                |
| 35              | TBHP (2.0)                                         | KI (40)                            | Et <sub>2</sub> O/AcOH              | 12       | 64                |
| 36              | TBHP (2.0)                                         | KI (40)                            | Anisole/AcOH                        | 12       | 78                |
| 37              | TBHP (3.0)                                         | KI (40)                            | Anisole/AcOH                        | 9        | 62                |
| 38              | TBHP (1.0)                                         | KI (40)                            | Anisole/AcOH                        | 12       | 46                |
| 39              | TBHP (2.0)                                         | KI (30)                            | Anisole/AcOH                        | 10       | 82                |
| 40              | TBHP (2.0)                                         | KI (20)                            | Anisole/AcOH                        | 12       | 95                |
| 41              | TBHP (2.0)                                         | KI (10)                            | Anisole/AcOH                        | 12       | 60                |
| 42              | TBHP (2.0)                                         | KI (20)                            | Anisole                             | 15       | n.r.              |
| 43              | TBHP (2.0)                                         | KI (20)                            | AcOH                                | 15       | trace             |
| 44              | TBHP (2.0)                                         | -                                  | Anisole/AcOH                        | 15       | n.r.              |
| 45              | -                                                  | KI (20)                            | Anisole/AcOH                        | 15       | trace             |

<sup>a</sup>Reaction conditions: **1** (0.5 mmol), **2** (1.25 mmol), **3** (1 mmol), oxidant, catalyst in 4 mL of solvent. <sup>b</sup>Isolated yield. <sup>c</sup>Determined by <sup>1</sup>H NMR of the crude products *E/Z* > 99:1; <sup>d</sup>V(DMSO)/V(AcOH) = 1/2; <sup>e</sup>V(DMSO)/V(AcOH) = 2/1; <sup>f</sup>TBHP in decane; <sup>g</sup>n.d. = not detected; <sup>h</sup>n.r. = no reaction.

### 3. General procedure.

#### 3.1 Synthesis of 5-alkylidene-pyrrolin-2-ones 4-8.

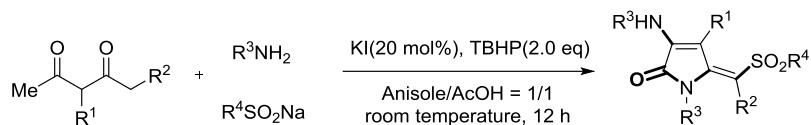

2,4-Pentanediones **1** (0.5 mmol), primary amines **2** (1.25 mmol), sodium sulfinates (1.0 mmol), KI (20 mol%), TBHP (70 wt.% in water, 2.0 eq.) and anisole/acetic acid (2.0 mL, v/v = 1/1) were charged into a 10 mL Ace Glass tubes, and the mixture was stirred at room temperature for 12.0 h until 2,4-pentanediones were completely consumed. EtOAc (15 mL × 2) were added. The organic phase was washed with water (10 mL), dried over Na<sub>2</sub>SO<sub>4</sub>, concentrated and purified by flash column chromatography to afford 5-alkylidene-3-pyrrolin-2-ones **4-8**.

#### 3.2 <sup>18</sup>O labeling reaction.

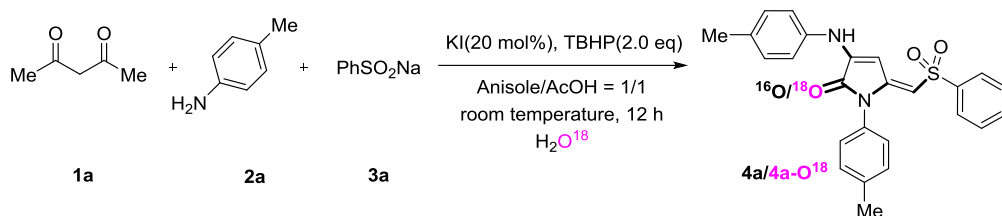

2,4-Pentanediones **1a** (0.25 mmol), primary amines **2a** (0.62 mmol), sodium sulfinates (0.5 mmol), KI (20 mol%), TBHP (in decene, 2.0 eq.), anisole/acetic acid (0.5 mL, v/v = 1/1), and H<sub>2</sub>O<sup>18</sup> (0.5 mL) were charged into a 10 mL Ace Glass tubes, and the mixture was stirred at room temperature for 12.0 h until 2,4-pentanediones were completely consumed. EtOAc (15 mL × 2) were added. The organic phase was washed with water (10 mL), dried over Na<sub>2</sub>SO<sub>4</sub>, concentrated and purified by flash column chromatography to afford 5-alkylidene-3-pyrrolin-2-ones **4a/4a-O<sup>18</sup>**.

#### 4. Confirmation of Z/E configuration of compound 7c.

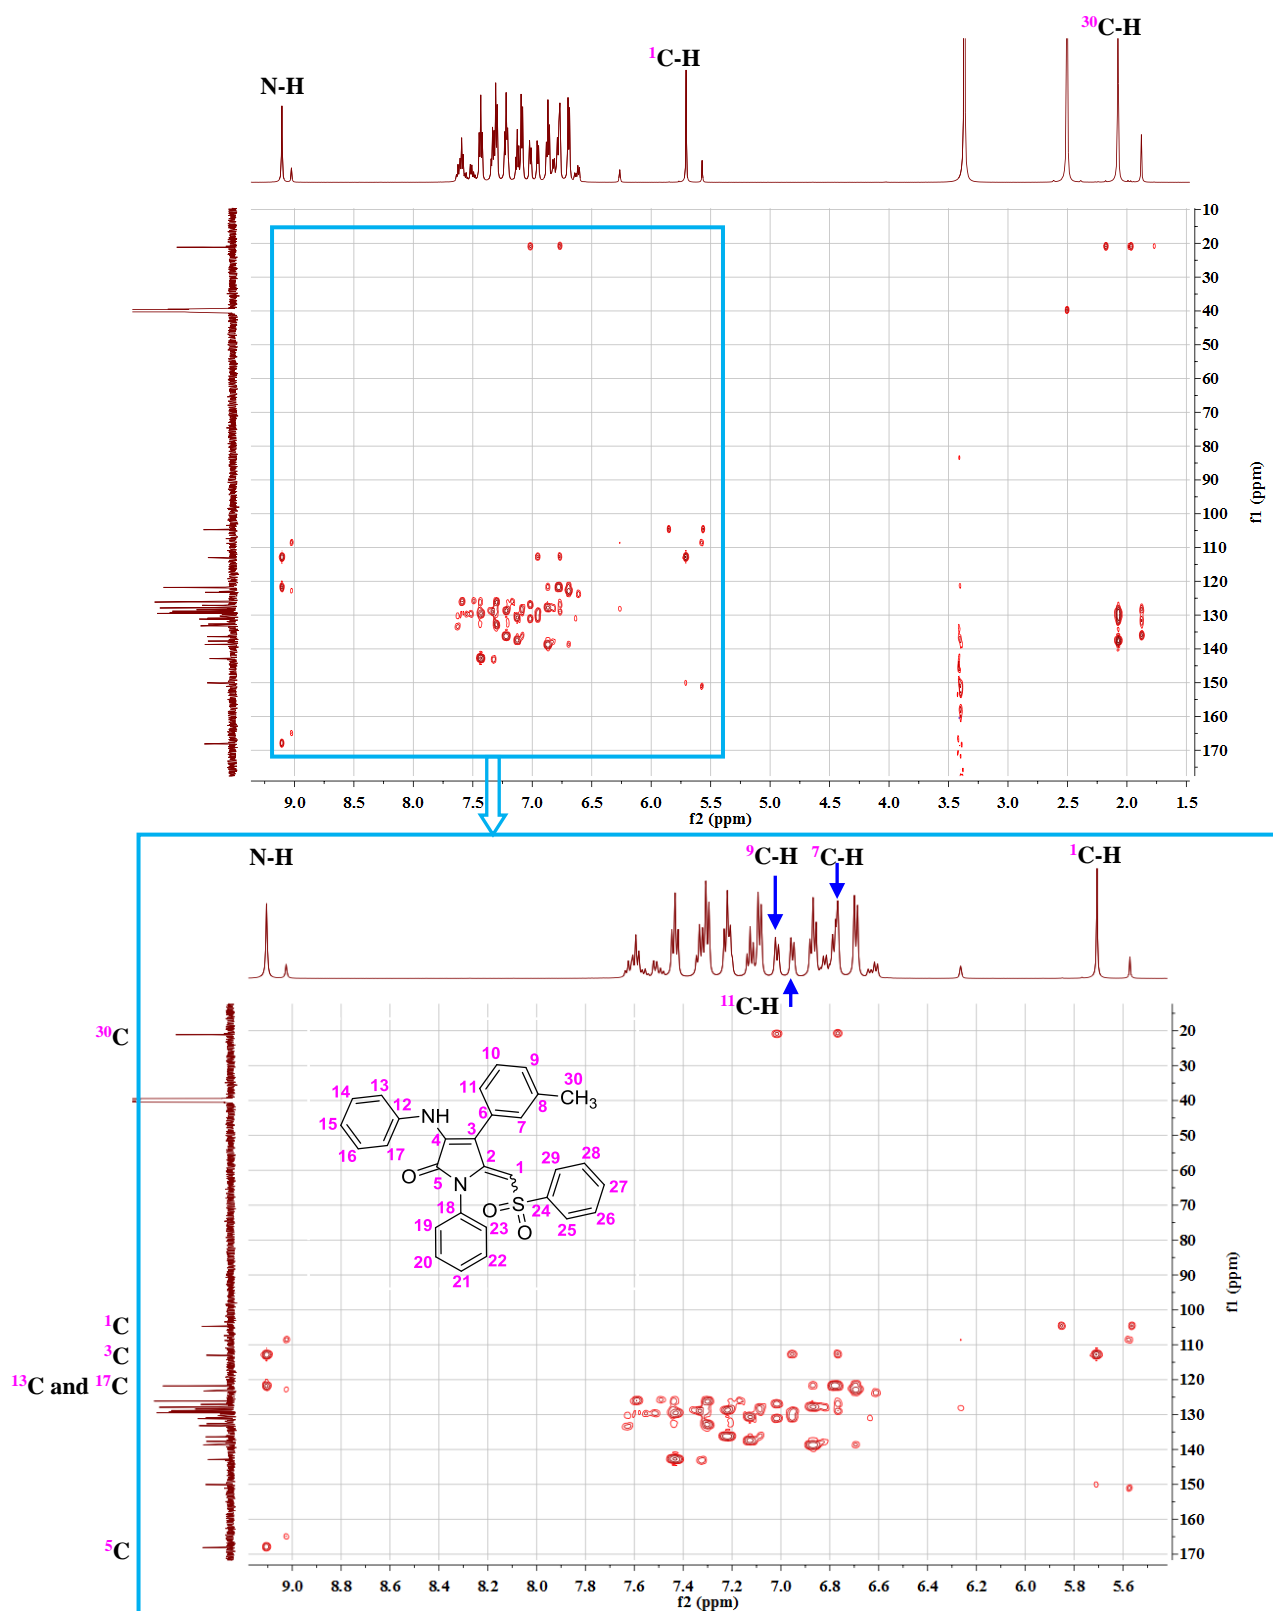

Figure S2. HMBC (600 MHz, DMSO- $d_6$ ) spectra of compound 7c

After the analysis of HMBC, the positions of  $^{13}\text{C}$ -H,  $^7\text{C}$ -H,  $^9\text{C}$ -H and  $^{11}\text{C}$ -H in the structure of compound 7c in  $^1\text{H}$  NMR spectrum is confirmed.

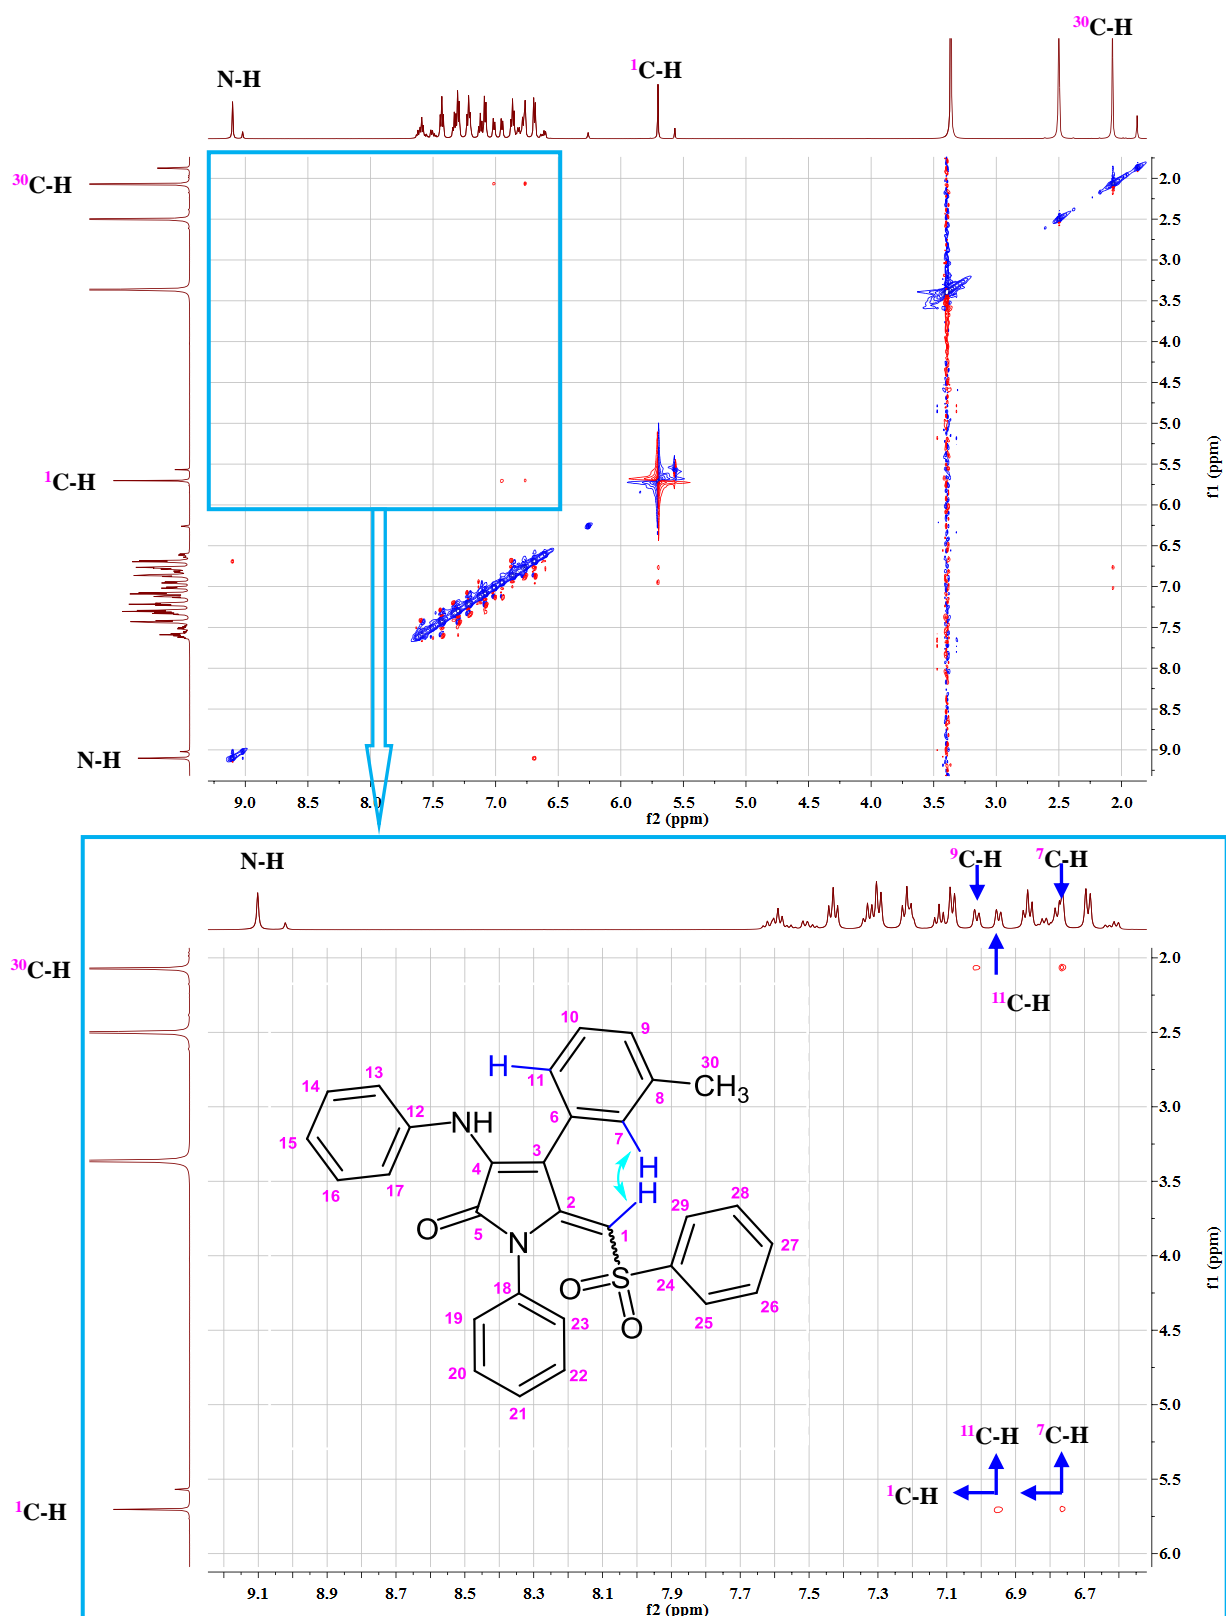

**Figure S3.** ROSEY (600 MHz,  $\text{DMSO-}d_6$ ) spectra of compound **7c**

After the analysis of ROSEY, it is confirmed that  $^{13}\text{C}$ -H in the structure of compound **7c** is only associated with  $^7\text{C}$ -H and  $^{11}\text{C}$ -H, not  $^{19}\text{C}$ -H and  $^{23}\text{C}$ -H. Therefore, it is proved that the structure configuration of major product in compound **7c** is the Z-type.

## 5. Spectroscopic data.

**(E)-5-((Phenylsulfonyl)methylene)-1-(p-tolyl)-3-(p-tolylamino)-1,5-dihydro-2H-pyrrol-2-one.**

**(4a)**

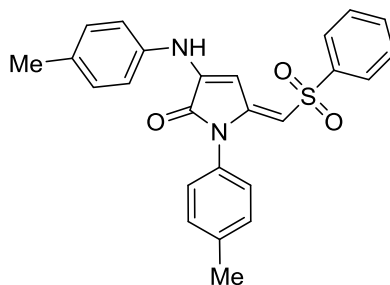

$V_{\text{Petroleum ether}}/V_{\text{Ethyl acetate}} = 18:1$ ,  $R_f = 0.2$ ; Yellow solid: 204 mg (95%), mp = 211–213 °C;

**$^1\text{H NMR}$**  (600 MHz,  $\text{CDCl}_3$ ):  $\delta = 7.89$  (d,  $J = 7.6$  Hz, 2H, ArH), 7.59–7.56 (m, 1H, ArH), 7.52–7.49 (m, 2H, ArH), 7.28 (s, 2H, ArH), 7.22 (d,  $J = 8.0$  Hz, 2H, ArH), 7.16–7.13 (m, 3H, ArH+NH), 7.09 (s, 2H, ArH), 7.08 (s, 1H, C=CH), 5.63 (s, 1H, C=CH), 2.40 (s, 3H, ArCH<sub>3</sub>), 2.37 (s, 3H, ArCH<sub>3</sub>);  **$^{13}\text{C NMR}$**  (150 MHz,  $\text{CDCl}_3$ ):  $\delta = 165.9$ , 152.1, 142.8, 139.3, 136.5, 136.1, 133.6, 133.0, 130.4, 130.4, 130.3, 130.3, 129.7, 129.3, 129.3, 127.9, 127.9, 126.9, 126.9, 118.4, 118.4, 105.3, 92.0, 21.3, 20.9; **HRMS** (TOF ES+): m/z calcd for  $\text{C}_{25}\text{H}_{23}\text{N}_2\text{O}_3\text{S}$  [(M+H)<sup>+</sup>], 431.1424, found, 431.1430.

**(E)-5-((Phenylsulfonyl)methylene)-1-(m-tolyl)-3-(m-tolylamino)-1,5-dihydro-2H-pyrrol-2-one**

**(4b)**

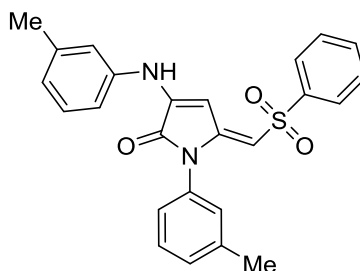

$V_{\text{Petroleum ether}}/V_{\text{Ethyl acetate}} = 10:1$ ,  $R_f = 0.2$ ; Yellow solid: 200 mg (93%), mp = 147–149 °C;  **$^1\text{H NMR}$**  (600 MHz,  $\text{CDCl}_3$ ):  $\delta = 7.90$  (d,  $J = 7.4$  Hz, 2H, ArH), 7.60–7.57 (m, 1H, ArH), 7.53–7.51 (m, 2H, ArH), 7.38–7.30 (m, 2H, ArH), 7.24–7.21 (m, 1H, ArH), 7.21 (s, 1H, C=CH), 7.09 (d,  $J = 5.8$  Hz, 1H, ArH), 7.04–7.02 (m, 3H, ArH+NH), 6.99 (d,  $J = 7.9$  Hz, 1H, ArH), 6.97 (d,  $J = 7.6$  Hz, 1H, ArH), 5.66 (s, 1H, C=CH), 2.41 (s, 3H, ArCH<sub>3</sub>), 2.38 (s, 3H, ArCH<sub>3</sub>);  **$^{13}\text{C NMR}$**  (150 MHz,  $\text{CDCl}_3$ ):  $\delta = 165.7$ , 151.9, 142.7, 140.0, 139.8, 138.9, 135.8, 133.0, 132.2, 130.0, 129.7, 129.5, 129.3, 129.3, 128.8, 126.9, 126.9, 125.1, 124.7, 119.1, 115.2, 105.6, 92.5, 21.6, 21.3; **HRMS** (TOF ES+): m/z calcd for  $\text{C}_{25}\text{H}_{23}\text{N}_2\text{O}_3\text{S}$  [(M+H)<sup>+</sup>], 431.1424, found, 431.1430.

**(E)-5-((Phenylsulfonyl)methylene)-1-(o-tolyl)-3-(o-tolylamino)-1,5-dihydro-2H-pyrrol-2-one**

**(4c)**



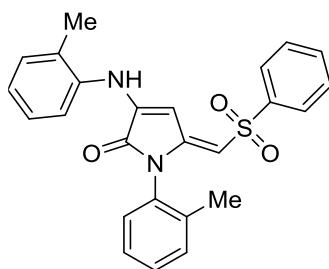

$V_{\text{Petroleum ether}}/V_{\text{Ethyl acetate}} = 18:1$ ,  $R_f = 0.2$ ; Yellow oli: 196 mg (91%);  $^1\text{H NMR}$  (600 MHz,  $\text{CDCl}_3$ ):  $\delta = 7.87$  (d,  $J = 7.4$  Hz, 2H, ArH), 7.59–7.57 (m, 1H, ArH), 7.52–7.50 (m, 2H, ArH), 7.46 (d,  $J = 7.9$  Hz, 1H, ArH), 7.38–7.36 (m, 2H, ArH), 7.33–7.30 (m, 1H, ArH), 7.28–7.27 (m, 2H, ArH), 7.12 (s, 1H, C=CH), 7.11–7.10 (m, 2H, ArH), 6.87 (s, 1H, NH), 5.41 (s, 1H, C=CH), 2.36 (s, 3H, ArCH<sub>3</sub>), 2.06 (s, 3H, ArCH<sub>3</sub>);  $^{13}\text{C NMR}$  (150 MHz,  $\text{CDCl}_3$ ):  $\delta = 165.5$ , 151.6, 142.7, 137.3, 137.1, 136.5, 133.0, 131.5, 131.2, 131.2, 129.9, 129.3, 129.3, 129.1, 127.9, 127.5, 127.3, 126.8, 126.8, 124.2, 118.3, 105.4, 92.2, 17.6, 17.5; **HRMS** (TOF ES<sup>+</sup>):  $m/z$  calcd for  $\text{C}_{25}\text{H}_{23}\text{N}_2\text{O}_3\text{S}$  [(M+H)<sup>+</sup>], 431.1424, found, 431.1430.

**(E)-1-(3,4-Dimethylphenyl)-3-((3,4-dimethylphenyl)amino)-5-((phenylsulfonyl)methylene)-1,5-dihydro-2H-pyrrol-2-one. (4d)**

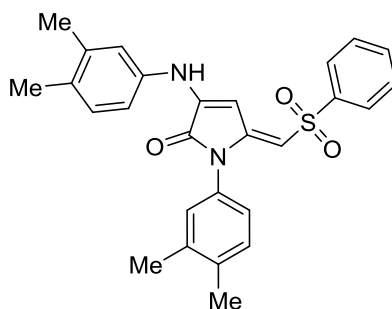

$V_{\text{Petroleum ether}}/V_{\text{Ethyl acetate}} = 18:1$ ,  $R_f = 0.2$ ; Yellow solid: 203 mg (89%), mp = 177–179 °C;  $^1\text{H NMR}$  (600 MHz,  $\text{CDCl}_3$ ):  $\delta = 7.90$ –7.88 (m, 2H, ArH), 7.59–7.56 (m, 1H, ArH), 7.52–7.50 (m, 2H, ArH), 7.22–7.18 (dd, 13.7, 8.0 Hz, 2H, ArH), 7.12 (s, 1H, C=CH), 7.04–7.02 (dd,  $J = 8.0$ , 2.3 Hz, 1H, ArH), 6.99–6.98 (m, 3H, ArH+NH), 6.93–6.91 (dd,  $J = 7.9$ , 2.0 Hz, 1H, ArH), 5.63 (s, 1H, C=CH), 2.31 (s, 3H, ArCH<sub>3</sub>), 2.29 (s, 3H, ArCH<sub>3</sub>), 2.28 (s, 3H, ArCH<sub>3</sub>), 2.27 (s, 3H, ArCH<sub>3</sub>);  $^{13}\text{C NMR}$  (150 MHz,  $\text{CDCl}_3$ ):  $\delta = 165.9$ , 152.4, 142.9, 138.4, 138.2, 138.1, 136.7, 136.2, 132.9, 132.4, 130.8, 130.8, 129.9, 129.3, 129.3, 129.1, 126.9, 126.9, 125.5, 119.9, 115.6, 105.2, 91.8, 20.1, 19.9, 19.6, 19.3; **HRMS** (TOF ES<sup>+</sup>):  $m/z$  calcd for  $\text{C}_{27}\text{H}_{27}\text{N}_2\text{O}_3\text{S}$  [(M+H)<sup>+</sup>], 459.1737, found, 459.1745.

**(E)-1-(4-Methoxyphenyl)-3-((4-methoxyphenyl)amino)-5-((phenylsulfonyl)methylene)-1,5-dihydro-2H-pyrrol-2-one. (4e)**

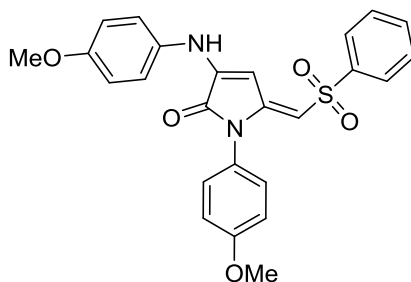

$V_{\text{Petroleum ether}}/V_{\text{Ethyl acetate}} = 25:1$ ,  $R_f = 0.2$ ; Yellow solid: 221 mg (96%), mp = 217–218 °C;  $^1\text{H NMR}$  (600 MHz,  $\text{CDCl}_3$ ):  $\delta = 7.89\text{--}7.88$  (m, 2H, ArH), 7.59–7.56 (m, 1H, ArH), 7.52–7.50 (m, 2H, ArH), 7.19 (d,  $J = 8.9$  Hz, 2H, ArH), 7.12 (d,  $J = 8.9$  Hz, 2H, ArH), 7.07 (s, 1H, C=CH), 7.01 (s, 1H, NH), 6.97 (d,  $J = 2.2$  Hz, 2H, ArH), 6.96 (d,  $J = 2.2$  Hz, 2H, ArH), 5.59 (s, 1H, C=CH), 3.85 (s, 3H,  $\text{ArOCH}_3$ ), 3.84 (s, 3H,  $\text{ArOCH}_3$ );  $^{13}\text{C NMR}$  (150 MHz,  $\text{CDCl}_3$ ):  $\delta = 165.9, 159.9, 156.2, 152.5, 142.8, 136.6, 132.9, 132.2, 129.5, 129.5, 129.3, 129.3, 126.8, 126.8, 124.8, 120.1, 120.1, 115.0, 115.0, 115.0, 115.0, 104.9, 90.9, 55.6, 55.6$ ; **HRMS** (TOF ES+): m/z calcd for  $\text{C}_{25}\text{H}_{23}\text{N}_2\text{O}_5\text{S}$  [(M+H)<sup>+</sup>], 463.1322, found, 463.1328.

**(E)-1-(3-Methoxyphenyl)-3-((3-methoxyphenyl)amino)-5-((phenylsulfonyl)methylene)-1,5-dihydro-2H-pyrrol-2-one. (4f)**

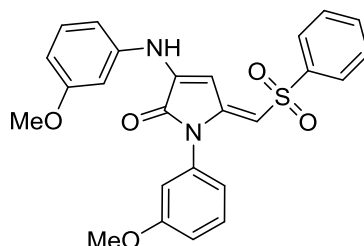

$V_{\text{Petroleum ether}}/V_{\text{Ethyl acetate}} = 8:1$ ,  $R_f = 0.2$ ; Yellow solid: 207 mg (90%), mp = 171–172 °C;  $^1\text{H NMR}$  (600 MHz,  $\text{CDCl}_3$ ):  $\delta = 7.91\text{--}7.89$  (m, 2H, ArH), 7.60–7.57 (m, 1H, ArH), 7.52 (dd,  $J = 8.4$  Hz, 7.0 Hz, 2H, ArH), 7.39–7.36 (m, 1H, ArH), 7.35–7.32 (m, 1H, ArH), 7.25 (s, 1H, C=CH), 7.07 (s, 1H, NH), 6.98–6.97 (dd,  $J = 8.4$  Hz, 1.9 Hz, 1H, ArH), 6.86–6.84 (dd,  $J = 8.0$  Hz, 1.7 Hz, 1H, ArH), 6.79–6.77 (m, 2H, ArH), 6.73 (t, 1H,  $J = 2.1$  Hz, ArH), 6.70–6.69 (dd,  $J = 8.3, 2.0$  Hz, 1H, ArH), 5.72 (s, 1H, C=CH), 3.86 (s, 3H,  $\text{ArOCH}_3$ ), 3.79 (s, 3H,  $\text{ArOCH}_3$ );  $^{13}\text{C NMR}$  (150 MHz,  $\text{CDCl}_3$ ):  $\delta = 165.5, 160.7, 160.4, 151.5, 142.6, 140.1, 135.7, 133.3, 133.0, 130.7, 130.5, 129.3, 129.3, 126.9, 126.9, 120.2, 114.9, 113.8, 110.7, 109.4, 106.0, 104.3, 93.1, 55.5, 55.4$ ; **HRMS** (TOF ES+): m/z calcd for  $\text{C}_{25}\text{H}_{23}\text{N}_2\text{O}_5\text{S}$  [(M+H)<sup>+</sup>], 463.1322, found, 463.1329.

**(E)-5-((Phenylsulfonyl)methylene)-1-(3,4,5-trimethoxyphenyl)-3-((3,4,5-trimethoxyphenyl)amino)-1,5-dihydro-2H-pyrrol-2-one. (4g)**

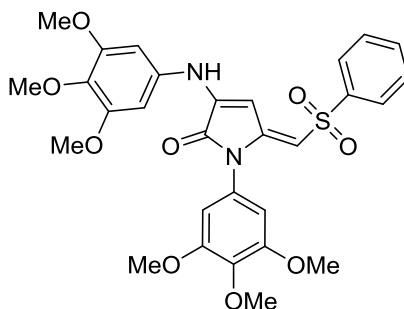

$V_{\text{Petroleum ether}}/V_{\text{Ethyl acetate}} = 8:1$ ,  $R_f = 0.2$ ; Yellow solid: 244 mg (84%), mp = 198–199 °C;  $^1\text{H NMR}$  (600 MHz,  $\text{CDCl}_3$ ):  $\delta = 7.89$  (d,  $J = 7.6$  Hz, 2H, ArH), 7.61–7.59 (m, 1H, ArH), 7.54–7.51 (m, 2H, ArH), 7.25 (s, 1H, C=CH), 6.96 (s, 1H, NH), 6.50 (s, 2H, ArH), 6.40 (s, 2H, ArH), 5.71 (s, 1H, C=CH), 3.93 (s, 6H,  $\text{ArOCH}_3$ ), 3.88 (s, 6H,  $\text{ArOCH}_3$ ), 3.81 (s, 6H,  $\text{ArOCH}_3$ );  $^{13}\text{C NMR}$  (150 MHz,  $\text{CDCl}_3$ ):  $\delta = 165.6, 154.0, 154.0, 153.8, 153.8, 151.7, 142.6, 138.5, 135.9, 135.0, 134.4, 133.1, 129.3, 129.3, 127.7, 126.8, 126.8, 106.0, 105.5, 105.5, 96.2, 96.2, 92.7, 61.1, 60.9, 56.2$ .

56.2, 56.2, 56.2; **HRMS** (TOF ES+): m/z calcd for C<sub>29</sub>H<sub>31</sub>N<sub>2</sub>O<sub>9</sub>S [(M+H)<sup>+</sup>], 583.1745, found, 583.1750.

**(E)-1-Phenyl-3-(phenylamino)-5-((phenylsulfonyl)methylene)-1,5-dihydro-2H-pyrrol-2-one (4h)**

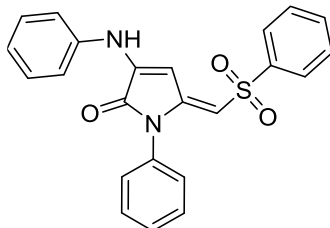

V<sub>Petroleum ether</sub>/V<sub>Ethyl acetate</sub> = 18:1, R<sub>f</sub> = 0.2; Yellow solid: 177 mg (88%), mp = 204–205 °C; **<sup>1</sup>H NMR** (600 MHz, CDCl<sub>3</sub>): δ = 7.90 (d, J = 7.6 Hz, 2H, ArH), 7.59–7.57 (m, 1H, ArH), 7.53–7.42 (m, 8H, ArH), 7.25–7.21 (m, 4H, ArH+C=CH), 7.16–7.13 (m, 2H, ArH+NH), 5.68 (s, 1H, C=CH); **<sup>13</sup>C NMR** (150 MHz, CDCl<sub>3</sub>): δ = 165.7, 151.7, 142.6, 139.0, 135.8, 133.1, 132.4, 129.8, 129.8, 129.8, 129.8, 129.3, 129.3, 129.1, 128.2, 128.2, 126.9, 126.9, 123.8, 118.3, 118.3, 105.8, 92.7; **HRMS** (TOF ES+): m/z calcd for C<sub>23</sub>H<sub>19</sub>N<sub>2</sub>O<sub>5</sub>S [(M+H)<sup>+</sup>], 403.1111, found, 403.1115.

**(E)-1-(4-Fluorophenyl)-3-((4-fluorophenyl)amino)-5-((phenylsulfonyl)methylene)-1,5-dihydro-2H-pyrrol-2-one. (4i)**

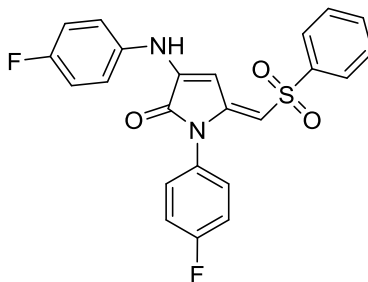

V<sub>Petroleum ether</sub>/V<sub>Ethyl acetate</sub> = 10:1, R<sub>f</sub> = 0.2; Yellow solid: 206 mg (94%), mp = 245–246 °C; **<sup>1</sup>H NMR** (600 MHz, CDCl<sub>3</sub>): δ = 7.90–7.87 (m, 2H, ArH), 7.62–7.58 (m, 1H, ArH), 7.53 (dd, J = 8.4, 7.1 Hz, 2H, ArH), 7.23–7.19 (m, 4H, ArH+NH), 7.19–7.17 (m, 3H, ArH), 7.15–7.12 (m, 2H, ArH), 7.06 (s, 1H, C=CH), 5.61 (s, 1H, C=CH); **<sup>13</sup>C NMR** (150 MHz, CDCl<sub>3</sub>): δ = 165.6, 162.60 (d, J = 250.0 Hz), 159.07 (d, J = 244.4 Hz), 151.4, 142.4, 136.1, 135.0 (d, J = 2.8 Hz), 133.2, 130.1 (d, J = 8.9 Hz), 130.1 (d, J = 8.9 Hz), 129.4, 129.4, 128.2 (d, J = 3.2 Hz), 126.9, 126.9, 120.1 (d, J = 7.9 Hz), 120.1 (d, J = 7.9 Hz), 116.9 (d, J = 22.8 Hz), 116.9 (d, J = 22.8 Hz), 116.7 (d, J = 23.0 Hz), 116.7 (d, J = 23.0 Hz), 105.9, 92.3; **HRMS** (TOF ES+): m/z calcd for C<sub>23</sub>H<sub>17</sub>N<sub>2</sub>F<sub>2</sub>O<sub>5</sub>S [(M+H)<sup>+</sup>], 439.0922, found, 439.0928.

**(E)-1-(3-Fluorophenyl)-3-((3-fluorophenyl)amino)-5-((phenylsulfonyl)methylene)-1,5-dihydro-2H-pyrrol-2-one. (4j).**

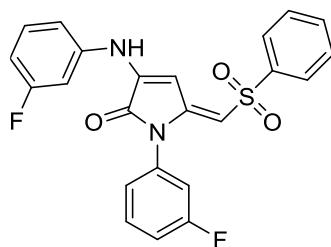

$V_{\text{Petroleum ether}}/V_{\text{Ethyl acetate}} = 15:1$ ,  $R_f = 0.2$ ; Yellow solid: 201 mg (92%), mp = 218–219 °C;  $^1\text{H NMR}$  (600 MHz,  $\text{CDCl}_3$ ):  $\delta = 7.91$  (d,  $J = 7.6$  Hz, 2H, ArH), 7.62–7.60 (m, 1H, ArH), 7.56–7.53 (m, 2H, ArH), 7.49–7.45 (m, 1H, ArH), 7.41–7.37 (m, 1H, ArH), 7.29 (s, 1H, C=CH), 7.19–7.16 (m, 2H, ArH+NH), 7.04–7.02 (m, 2H, ArH), 6.97 (d,  $J = 8.9$  Hz, 1H, ArH), 6.94 (d,  $J = 10.0$  Hz, 1H, ArH), 5.74 (s, 1H, C=CH);  $^{13}\text{C NMR}$  (150 MHz,  $\text{CDCl}_3$ ):  $\delta = 165.2$ , 163.4 ( $J = 244.5$  Hz), 162.8 ( $J = 247.5$  Hz), 150.5, 142.2, 140.4 ( $J = 10.3$  Hz), 135.3, 133.5 ( $J = 10.0$  Hz), 133.3, 131.2 ( $J = 9.5$  Hz), 131.0 ( $J = 9.0$  Hz), 129.4, 129.4, 127.0, 127.0, 123.9, 116.5 ( $J = 20.8$  Hz), 115.7 ( $J = 23.2$  Hz), 113.9, 110.7 ( $J = 21.4$  Hz), 106.8, 105.7 ( $J = 25.4$  Hz), 94.0; **HRMS** (TOF ES+):  $m/z$  calcd for  $\text{C}_{23}\text{H}_{17}\text{N}_2\text{F}_2\text{O}_3\text{S}$  [(M+H)<sup>+</sup>], 439.0922, found, 439.0927.

**(E)-1-(4-Chlorophenyl)-3-((4-chlorophenyl)amino)-5-((phenylsulfonyl)methylene)-1,5-dihydro-2H-pyrrol-2-one (4k)**

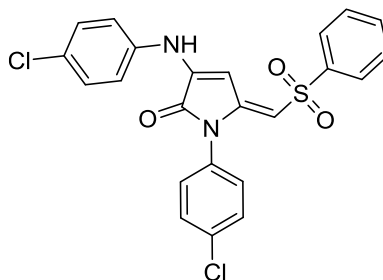

$V_{\text{Petroleum ether}}/V_{\text{Ethyl acetate}} = 20:1$ ,  $R_f = 0.2$ ; Yellow solid: 171mg (73%), mp = 245–246 °C;  $^1\text{H NMR}$  (600 MHz,  $\text{CDCl}_3$ ):  $\delta = 7.90$ –7.89 (m, 2H, ArH), 7.62–7.59 (m, 1H, ArH), 7.54–7.52 (m, 2H, ArH), 7.47–7.45 (m, 2H, ArH), 7.39–7.38 (m, 2H, ArH), 7.25 (s, 1H, C=CH), 7.18–7.15 (m, 4H, ArH), 7.12 (s, 1H, NH), 5.66 (s, 1H, C=CH);  $^{13}\text{C NMR}$  (150 MHz,  $\text{CDCl}_3$ ):  $\delta = 165.4$ , 150.8, 142.2, 137.5, 135.5, 135.3, 133.3, 130.7, 130.1, 130.1, 129.9, 129.9, 129.4, 129.4, 129.4, 129.4, 129.0, 126.9, 126.9, 119.5, 119.5, 106.4, 93.3; **HRMS** (TOF ES+):  $m/z$  calcd for  $\text{C}_{23}\text{H}_{17}\text{Cl}_2\text{N}_2\text{O}_3\text{S}$  [(M+H)<sup>+</sup>], 471.0331, found, 471.0334.

**(E)-1-(3-Chlorophenyl)-3-((3-chlorophenyl)amino)-5-((phenylsulfonyl)methylene)-1,5-dihydro-2H-pyrrol-2-one (4l)**

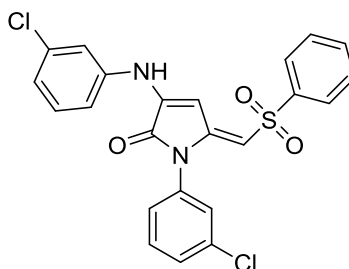

$V_{\text{Petroleum ether}}/V_{\text{Ethyl acetate}} = 10:1$ ,  $R_f = 0.2$ ; Yellow solid: 162 mg (69%), mp = 213–214 °C;  $^1\text{H NMR}$  (600 MHz,  $\text{CDCl}_3$ ):  $\delta = 7.92$  (d,  $J = 7.6$  Hz, 2H, ArH), 7.63–7.60 (m, 1H, ArH), 7.56–7.54 (m, 2H, ArH), 7.44–7.43 (m, 2H, ArH), 7.38–7.36 (m, 1H, ArH), 7.27 (s, 1H, C=CH), 7.24 (s, 1H, ArH), 7.20 (s, 1H, ArH), 7.16 (d,  $J = 8.1$  Hz, 1H), 7.13–7.11 (m, 3H, ArH+NH), 5.72 (s, 1H, C=CH);  $^{13}\text{C NMR}$  (150 MHz,  $\text{CDCl}_3$ ):  $\delta = 165.2, 150.6, 142.2, 140.0, 135.4, 135.4, 135.3, 133.3, 133.3, 130.9, 130.7, 129.6, 129.4, 129.4, 128.4, 127.0, 127.0, 126.4, 124.0, 118.6, 116.2, 106.9, 94.1$ ; **HRMS** (TOF ES+): m/z calcd for  $\text{C}_{23}\text{H}_{17}\text{Cl}_2\text{N}_2\text{O}_3\text{S}$  [(M+H)<sup>+</sup>], 471.0331, found, 471.0331.

**(E)-1-(3-Bromophenyl)-3-((3-bromophenyl)amino)-5-((phenylsulfonyl)methylene)-1,5-dihydro-2H-pyrrol-2-one. (4m)**

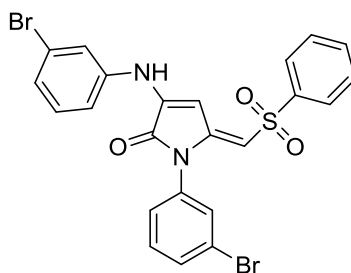

$V_{\text{Petroleum ether}}/V_{\text{Ethyl acetate}} = 10:1$ ,  $R_f = 0.2$ ; Yellow solid: 251 mg (90%), mp = 212–214 °C;  $^1\text{H NMR}$  (600 MHz,  $\text{CDCl}_3$ ):  $\delta = 7.92$  (d,  $J = 7.3$  Hz, 2H, ArH), 7.62–7.54 (m, 4H, ArH+NH), 7.39–7.36 (m, 3H, ArH), 7.32–7.29 (m,  $J = 7.8$  Hz, 3H, ArH), 7.21 (d,  $J = 7.0$  Hz, 1H, ArH), 7.17 (d,  $J = 7.4$  Hz, 1H, ArH), 7.05 (s, 1H, C=CH), 5.72 (s, 1H, C=CH);  $^{13}\text{C NMR}$  (150 MHz,  $\text{CDCl}_3$ ):  $\delta = 165.1, 150.6, 142.2, 140.1, 135.2, 133.4, 133.3, 132.5, 131.3, 131.2, 131.0, 129.4, 129.4, 127.0, 127.0, 126.9, 126.8, 123.4, 123.1, 121.5, 116.7, 106.9, 94.1$ ; **HRMS** (TOF ES+): m/z calcd for  $\text{C}_{23}\text{H}_{17}\text{Br}_2\text{N}_2\text{O}_3\text{S}$  [(M+H)<sup>+</sup>], 558.9321, found, 558.9323.

**(E)-5-((Phenylsulfonyl)methylene)-1-(4-(trifluoromethyl)phenyl)-3-((4-(trifluoromethyl)phenyl)amino)-1,5-dihydro-2H-pyrrol-2-one.(4n)**

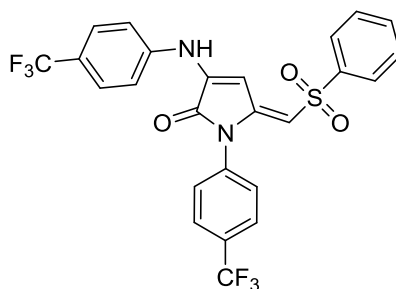

$V_{\text{Petroleum ether}}/V_{\text{Ethyl acetate}} = 11:1$ ,  $R_f = 0.2$ ; Yellow solid: 207 mg (77%), mp = 271–273 °C;  $^1\text{H NMR}$  (600 MHz,  $\text{CDCl}_3$ ):  $\delta = 7.91$  (d,  $J = 7.7$  Hz, 1H, ArH), 7.77 (d,  $J = 8.1$  Hz, 1H, ArH), 7.69 (d,  $J = 8.2$  Hz, 1H, ArH), 7.62 (s, 1H, NH), 7.56–7.53 (m, 1H, ArH), 7.45 (s, 1H, C=CH), 7.38 (d,  $J = 8.1$  Hz, 1H, ArH), 7.33 (d,  $J = 8.2$  Hz, 1H, ArH), 5.75 (s, 1H, C=CH);  $^{13}\text{C NMR}$  (600 MHz,  $\text{CDCl}_3$ ):  $\delta = 165.1, 149.8, 141.9, 141.9, 135.4, 134.8, 133.4, 131.2$  (d,  $J = 34.1$  Hz), 129.4, 129.4, 128.4, 128.4, 127.1, 127.1, 127.0, 127.0, 127.0, 127.0, 125.52 (d,  $J = 33.0$  Hz), 123.9 (d,  $J = 268.5$  Hz), 123.4 (d,  $J = 274.5$  Hz), 117.8, 117.8, 107.4, 95.1; **HRMS** (TOF ES+): m/z calcd for  $\text{C}_{27}\text{H}_{17}\text{N}_2\text{F}_6\text{O}_3\text{S}$  [(M+H)<sup>+</sup>], 539.0859, found, 539.0858.

**(E)-1-(4-(Methylsulfonyl)phenyl)-3-((4-(methylsulfonyl)phenyl)amino)-5-((phenylsulfonyl)methylene)-1,5-dihydro-2H-pyrrol-2-one. (4o).**

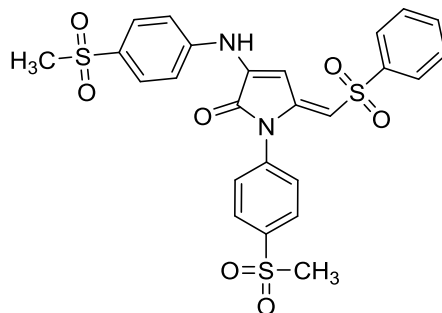

$V_{\text{Petroleum ether}}/V_{\text{Ethyl acetate}} = 5:1$ ,  $R_f = 0.2$ ; Yellow solid: 131 mg (47%), mp = 304–306 °C;  $^1\text{H NMR}$  (600 MHz, DMSO- $d_6$ ):  $\delta = 10.04$  (s, 1H, NH), 8.09 (d,  $J = 8.4$  Hz, 2H, ArH), 8.01 (d,  $J = 8.7$  Hz, 2H, ArH), 7.97 (d,  $J = 7.5$  Hz, 2H, ArH), 7.71–7.68 (m, 1H, ArH), 7.66–7.64 (m, 3H, ArH), 7.62 (d,  $J = 8.4$  Hz, 3H, ArH), 7.29 (s, 1H, C=CH), 5.94 (s, 1H, C=CH), 3.31 (s, 3H, CH<sub>3</sub>), 3.24 (s, 3H, CH<sub>3</sub>);  $^{13}\text{C NMR}$  (150 MHz, DMSO- $d_6$ ):  $\delta = 165.0, 150.8, 145.2, 142.8, 141.2, 137.5, 136.9, 134.7, 133.9, 130.1, 130.1, 129.9, 129.9, 129.4, 129.4, 129.0, 129.0, 127.2, 127.2, 119.1, 119.1, 105.9, 95.4, 44.2, 43.8$ ; **HRMS** (TOF ES<sup>+</sup>):  $m/z$  calcd for C<sub>25</sub>H<sub>23</sub>N<sub>2</sub>O<sub>7</sub>S<sub>3</sub> [(M+H)<sup>+</sup>], 559.0662, found, 559.0662.

**(E)-1-(4-Hydroxyphenyl)-3-((4-hydroxyphenyl)amino)-5-((phenylsulfonyl)methylene)-1,5-dihydro-2H-pyrrol-2-one.(4p)**

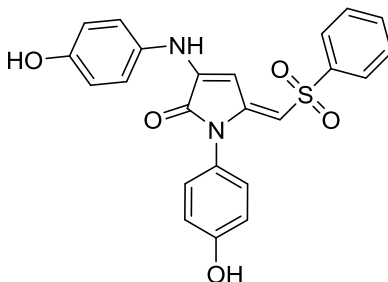

$V_{\text{Petroleum ether}}/V_{\text{Ethyl acetate}} = 2:1$ ,  $R_f = 0.2$ ; Orange solid: 169 mg (78%), mp = 241–243 °C;  $^1\text{H NMR}$  (600 MHz, DMSO- $d_6$ ):  $\delta = 9.91$  (s, 1H, NH), 9.49 (s, 1H, ArOH), 9.35 (s, 1H, ArOH), 7.86 (d,  $J = 7.7$  Hz, 2H, ArH), 7.68–7.65 (m, 1H, ArH), 7.61–7.59 (m, 2H, ArH), 7.21 (d,  $J = 8.4$  Hz, 2H, ArH), 7.09 (d,  $J = 8.2$  Hz, 2H, ArH), 6.87–6.84 (m, 4H, ArH), 6.71 (s, 1H, C=CH), 5.35 (s, 1H, C=CH);  $^{13}\text{C NMR}$  (150 MHz, DMSO- $d_6$ ):  $\delta = 165.6, 158.3, 154.3, 153.6, 143.5, 138.9, 133.5, 131.9, 130.3, 130.3, 130.0, 130.0, 126.8, 126.8, 123.8, 121.7, 121.7, 116.5, 116.5, 116.4, 116.4, 102.3, 88.9$ ; **HRMS** (TOF ES<sup>+</sup>):  $m/z$  calcd for C<sub>23</sub>H<sub>19</sub>N<sub>2</sub>O<sub>5</sub>S [(M+H)<sup>+</sup>], 435.1009, found, 435.1010.

**(E)-1-(3-hydroxyphenyl)-3-((3-hydroxyphenyl)amino)-5-((phenylsulfonyl)methylene)-1,5-dihydro-2H-pyrrol-2-one. (4q)**

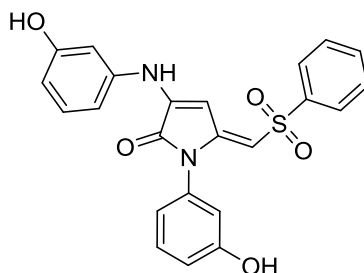

$V_{\text{Petroleum ether}}/V_{\text{Ethyl acetate}} = 1:1$ ,  $R_f = 0.2$ ; Yellow solid: 163 mg (75%), mp = 251–252 °C;  $^1\text{H NMR}$  (500 MHz,  $\text{DMSO-}d_6$ ):  $\delta = 9.91$  (s, 1H, NH), 9.74 (s, 1H, ArOH), 9.44 (s, 1H, ArOH), 7.89 (d,  $J = 7.2$  Hz, 2H, ArH), 7.67–7.66 (m, 1H, ArH), 7.62–7.61 (m, 2H, ArH), 7.31 (t,  $J = 7.7$  Hz, 1H, ArH), 7.22 (t,  $J = 7.6$  Hz, 1H, ArH), 6.95 (s, 1H, C=CH), 6.88–6.84 (m, 3H, ArH), 6.71–6.70 (m, 1H, ArH), 6.67 (s, 1H, ArH), 6.53 (d,  $J = 8.2$  Hz, 1H, ArH), 5.53 (s, 1H, C=CH);  $^{13}\text{C NMR}$  (150 MHz,  $\text{DMSO-}d_6$ ):  $\delta = 165.2, 158.6, 158.6, 152.5, 143.2, 141.6, 137.9, 133.9, 133.7, 130.8, 130.6, 130.1, 130.1, 126.9, 126.9, 119.3, 116.5, 115.8, 111.1, 110.5, 106.6, 103.5, 91.6$ ; **HRMS** (TOF ES+):  $m/z$  calcd for  $\text{C}_{23}\text{H}_{19}\text{N}_2\text{O}_5\text{S}$  [(M+H)<sup>+</sup>], 435.1009, found, 435.1010.

**(E)-4-((1-(4-Carboxyphenyl)-2-oxo-5-((phenylsulfonyl)methylene)-2,5-dihydro-1H-pyrrol-3-yl)amino)benzoic acid. (4r)**

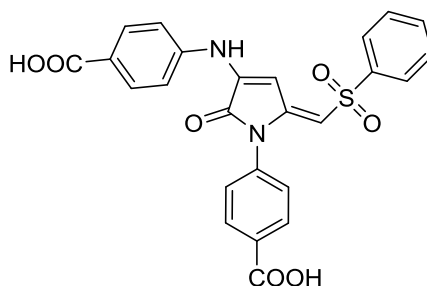

$V_{\text{Methanol}}/V_{\text{Ethyl acetate}} = 2:1$ ,  $R_f = 0.2$ ; Yellow solid: 125 mg (51%), mp = 343–345 °C;  $^1\text{H NMR}$  (600 MHz,  $\text{DMSO-}d_6$ ):  $\delta = 9.89$  (s, 1H, NH), 8.08 (d,  $J = 8.2$  Hz, 2H, ArH), 8.02 (d,  $J = 8.4$  Hz, 2H, ArH), 7.94 (d,  $J = 7.8$  Hz, 2H, ArH), 7.69–7.67 (m, 1H, ArH), 7.62–7.60 (m, 2H, ArH), 7.48 (dd,  $J = 13.9, 8.3$  Hz, 5H, ArH), 7.20 (s, 1H, C=CH), 5.81 (s, 1H, C=CH);  $^{13}\text{C NMR}$  (150 MHz,  $\text{DMSO-}d_6$ ):  $\delta = 167.3, 167.1, 165.0, 151.2, 144.6, 142.9, 137.0, 136.9, 133.8, 131.5, 131.5, 131.1, 131.1, 130.1, 130.1, 129.1, 129.1, 127.2, 127.2, 125.3, 118.7, 118.7, 118.7, 105.3, 94.5$ ; **HRMS** (TOF ES+):  $m/z$  calcd for  $\text{C}_{25}\text{H}_{19}\text{N}_2\text{O}_7\text{S}$  [(M+H)<sup>+</sup>], 491.0907, found, 491.0908.

**(E)-1-(Naphthalen-1-yl)-3-(naphthalen-1-ylamino)-5-((phenylsulfonyl)methylene)-1,5-dihydro-2H-pyrrol-2-one. (4s)**

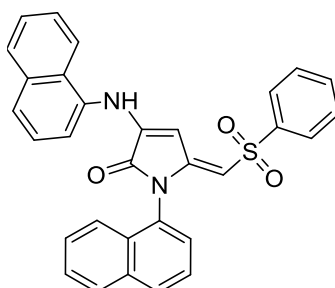

$V_{\text{Petroleum ether}}/V_{\text{Ethyl acetate}} = 10:1$ ,  $R_f = 0.2$ ; Yellow solid: 93mg (37%), mp = 219–220 °C; **<sup>1</sup>H NMR** (600 MHz, CDCl<sub>3</sub>):  $\delta = 8.03\text{--}8.02$  (m, 1H, ArH), 7.99 (d,  $J = 8.3$  Hz, 1H, ArH), 7.96–7.93 (m, 2H, ArH), 7.81–7.79 (m, 2H, ArH), 7.75 (d,  $J = 8.1$  Hz, 1H, ArH), 7.68–7.67 (m, 1H, ArH), 7.63–7.59 (m, 3H, ArH), 7.58–7.54 (m, 4H, ArH), 7.48–7.42 (m, 5H, ArH+NH), 7.27 (s, 1H, C=CH), 5.41 (s, 1H, C=CH); **<sup>13</sup>C NMR** (150 MHz, CDCl<sub>3</sub>):  $\delta = 166.2, 152.1, 142.6, 137.2, 134.6, 134.4, 134.1, 133.0, 130.5, 130.4, 129.2, 129.2, 129.0, 128.8, 128.7, 127.8, 127.6, 127.0, 126.8, 126.8, 126.7, 126.7, 126.1, 126.0, 125.6, 125.1, 122.3, 120.4, 116.1, 106.5, 93.2$ ; **HRMS** (TOF ES<sup>+</sup>): m/z calcd for C<sub>31</sub>H<sub>23</sub>N<sub>2</sub>O<sub>3</sub>S [(M+H)<sup>+</sup>], 503.1424, found, 503.1429.

**(E)-3-((1*H*-Indol-5-yl)amino)-1-(1*H*-indol-5-yl)-5-((phenylsulfonyl)methylene)-1,5-dihydro-2*H*-pyrrol-2-one. (4t)**

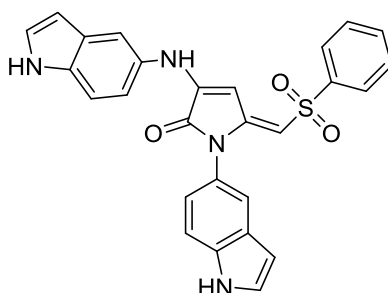

$V_{\text{Petroleum ether}}/V_{\text{Ethyl acetate}} = 13:1$ ,  $R_f = 0.2$ ; Orange yellow solid: 120 mg (50%), mp = 267–268 °C; **<sup>1</sup>H NMR** (600 MHz, DMSO-*d*<sub>6</sub>):  $\delta = 11.42$  (s, 1H, NH), 11.22 (s, 1H, NH), 9.45 (s, 1H, NH), 7.84 (d,  $J = 7.8$  Hz, 2H, ArH), 7.67–7.74 (m, 1H, ArH), 7.60–7.58 (m, 2H, ArH), 7.54–7.52 (m, 1H, ArH), 7.49–7.47 (m, 4H, ArH), 7.42–7.41 (m, 1H, ArH), 7.23 (d,  $J = 8.6$  Hz, 1H, C=CH), 6.96 (d,  $J = 8.4$  Hz, 1H, C=CH), 6.82 (s, 1H, C=CH), 6.50 (d,  $J = 12.0$  Hz, 2H, C=CH), 5.33 (s, 1H, C=CH); **<sup>13</sup>C NMR** (150 MHz, DMSO-*d*<sub>6</sub>):  $\delta = 166.0, 154.4, 143.6, 139.4, 136.0, 133.5, 133.4, 132.3, 130.0, 130.0, 128.3, 128.3, 127.6, 127.1, 126.7, 126.7, 124.3, 121.6, 121.0, 115.6, 112.7, 112.6, 111.3, 102.1, 102.1, 101.7, 88.6$ ; **HRMS** (TOF ES<sup>+</sup>): m/z calcd for C<sub>27</sub>H<sub>21</sub>N<sub>4</sub>O<sub>3</sub>S [(M+H)<sup>+</sup>], 481.1329, found, 481.1334.

**(E)-1-Ethyl-3-(ethylamino)-5-((phenylsulfonyl)methylene)-1,5-dihydro-2*H*-pyrrol-2-one. (4u)**

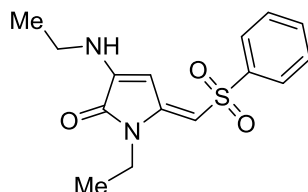

$V_{\text{Petroleum ether}}/V_{\text{Ethyl acetate}} = 8:1$ ,  $R_f = 0.2$ ; Light yellow solid: 61 mg (40%), mp = 152–154 °C; **<sup>1</sup>H NMR** (600 MHz, DMSO-*d*<sub>6</sub>):  $\delta = 7.92$  (d,  $J = 7.6$  Hz, 2H, ArH), 7.67–7.65 (m, 1H, ArH), 7.63–7.61 (m, 2H, ArH), 7.31 (t,  $J = 5.5$  Hz, 1H, NH), 6.19 (s, 1H, C=CH), 5.99 (s, 1H, C=CH), 3.55 (q,  $J = 6.9$  Hz, 2H, CH<sub>2</sub>), 3.16–3.11 (m, 2H, CH<sub>2</sub>), 1.15–1.12 (t,  $J = 7.2$  Hz, 3H, CH<sub>3</sub>), 0.98–0.96 (t,  $J = 7.0$  Hz, 3H, CH<sub>3</sub>); **<sup>13</sup>C NMR** (150 MHz, DMSO-*d*<sub>6</sub>):  $\delta = 165.3, 151.5, 144.1, 144.0, 133.2, 129.9, 129.9, 126.6, 126.6, 100.6, 85.8, 38.8, 34.2, 14.3, 13.8$ ; **HRMS** (TOF ES<sup>+</sup>): m/z calcd for C<sub>15</sub>H<sub>19</sub>N<sub>2</sub>O<sub>3</sub>S [(M+H)<sup>+</sup>], 307.1111, found, 307.1111.

**(E)-1-Butyl-3-(butylamino)-5-((phenylsulfonyl)methylene)-1,5-dihydro-2*H*-pyrrol-2-one. (4v)**



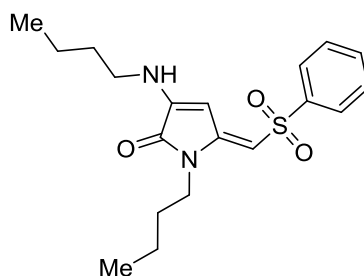

$V_{\text{Petroleum ether}}/V_{\text{Ethyl acetate}} = 10:1$ ,  $R_f = 0.2$ ; Yellow solid: 83 mg (46%), mp = 152–154 °C;  $^1\text{H NMR}$  (600 MHz,  $\text{DMSO-}d_6$ ):  $\delta = 7.90$  (d,  $J = 7.3$  Hz, 2H, ArH), 7.67–7.65 (m, 1H, ArH), 7.62–7.60 (m, 2H, ArH), 7.32 (t,  $J = 5.8$  Hz, 1H, NH), 6.15 (s, 1H, C=CH), 5.97 (s, 1H, C=CH), 3.51–3.48 (t,  $J = 7.1$  Hz, 2H,  $\text{CH}_2$ ), 3.11–3.07 (q,  $J = 6.8$  Hz, 2H,  $\text{CH}_2$ ), 1.54–1.49 (m, 2H,  $\text{CH}_2$ ), 1.37–1.35 (m, 2H,  $\text{CH}_2$ ), 1.33–1.29 (m, 2H,  $\text{CH}_2$ ), 1.19–1.15 (m, 2H,  $\text{CH}_2$ ), 0.89 (t,  $J = 7.1$  Hz, 3H,  $\text{CH}_3$ ), 0.82 (t,  $J = 7.1$  Hz, 3H,  $\text{CH}_3$ );  $^{13}\text{C NMR}$  (150 MHz,  $\text{DMSO-}d_6$ ):  $\delta = 165.5$ , 152.0, 144.1, 144.0, 133.2, 129.8, 129.8, 126.6, 126.6, 100.7, 85.6, 43.7, 39.0, 30.8, 30.3, 20.1, 19.7, 14.2, 14.1; **HRMS** (TOF ES<sup>+</sup>): m/z calcd for  $\text{C}_{19}\text{H}_{27}\text{N}_2\text{O}_3\text{S}$  [(M+H)<sup>+</sup>], 363.1737, found, 363.1738.

**(E)-1-Benzyl-3-(benzylamino)-5-((phenylsulfonyl)methylene)-1,5-dihydro-2H-pyrrol-2-one. (4w)**

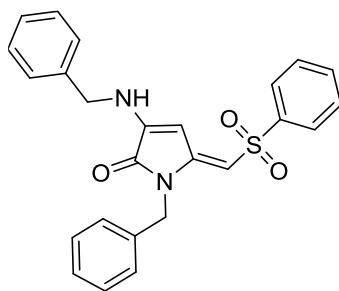

$V_{\text{Petroleum ether}}/V_{\text{Ethyl acetate}} = 6:1$ ,  $R_f = 0.2$ ; Yellow solid: 77 mg (36%), mp = 178–179 °C;  $^1\text{H NMR}$  (600 MHz,  $\text{DMSO-}d_6$ ):  $\delta = 8.02$  (t,  $J = 5.9$  Hz, 1H, NH), 7.66 (d,  $J = 7.7$  Hz, 2H, ArH), 7.63–7.60 (m, 1H, ArH), 7.53–7.50 (m, 2H, ArH), 7.40–7.37 (m, 2H, ArH), 7.34–7.32 (m, 3H, ArH), 7.29–7.27 (m, 2H, ArH), 7.24–7.22 (m, 1H, ArH), 7.11 (d,  $J = 7.4$  Hz, 2H, ArH), 6.08 (s, 1H, C=CH), 5.97 (s, 1H, C=CH), 4.74 (s, 2H,  $\text{CH}_2$ ), 4.36 (d,  $J = 5.9$  Hz, 2H,  $\text{CH}_2$ );  $^{13}\text{C NMR}$  (150 MHz,  $\text{DMSO-}d_6$ ):  $\delta = 165.8$ , 151.5, 143.8, 143.7, 138.2, 137.2, 133.2, 129.8, 129.8, 129.0, 129.0, 129.0, 129.0, 127.9, 127.9, 127.8, 127.7, 127.2, 127.2, 126.5, 126.5, 102.1, 87.8, 47.4, 42.4; **HRMS** (TOF ES<sup>+</sup>): m/z calcd for  $\text{C}_{25}\text{H}_{23}\text{N}_2\text{O}_3\text{S}$  [(M+H)<sup>+</sup>], 431.1424, found, 431.1428.

**(E)-1-Phenethyl-3-(phenethylamino)-5-((phenylsulfonyl)methylene)-1,5-dihydro-2H-pyrrol-2-one. (4x)**

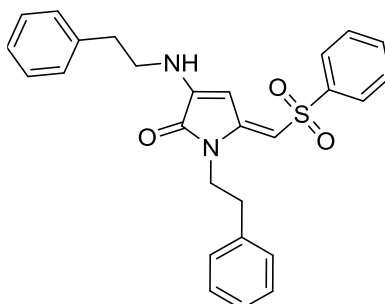

$V_{\text{Petroleum ether}}/V_{\text{Ethyl acetate}} = 4:1$ ,  $R_f = 0.2$ ; Yellow solid: 105 mg (46%), mp = 148–150 °C;  $^1\text{H NMR}$  (600 MHz,  $\text{DMSO-}d_6$ ):  $\delta = 7.87$  (d,  $J = 7.8$  Hz, 2H, ArH), 7.68–7.66 (m, 1H, ArH), 7.64–7.61 (m, 2H, ArH), 7.32–7.30 (m, 2H, ArH), 7.26 (t,  $J = 5.7$  Hz, 1H, NH), 7.23 (d,  $J = 7.3$  Hz, 3H, ArH), 7.18–7.15 (m, 2H, ArH), 7.12 (d,  $J = 7.1$  Hz, 1H, ArH), 7.07 (d,  $J = 7.3$  Hz, 2H, ArH), 6.15 (s, 1H, C=CH), 6.01 (s, 1H, C=CH), 3.75 (t,  $J = 7.0$  Hz, 2H,  $\text{CH}_2$ ), 3.35–3.31 (m, 2H,  $\text{CH}_2$ ), 2.83 (t,  $J = 7.2$  Hz, 2H,  $\text{CH}_2$ ), 2.70 (t,  $J = 7.0$  Hz, 2H,  $\text{CH}_2$ );  $^{13}\text{C NMR}$  (150 MHz,  $\text{DMSO-}d_6$ ):  $\delta = 165.3$ , 151.7, 144.0, 143.6, 139.5, 138.5, 133.2, 129.8, 129.8, 129.2, 129.2, 129.1, 129.1, 128.8, 128.8, 128.6, 128.6, 126.8, 126.7, 126.7, 126.7, 101.2, 86.3, 45.5, 40.6, 34.4, 34.0; **HRMS** (TOF ES<sup>+</sup>): m/z calcd for  $\text{C}_{27}\text{H}_{27}\text{N}_2\text{O}_3\text{S}$  [(M+H)<sup>+</sup>], 459.1737, found, 459.1738.

**(E)-1-(4-Methoxyphenethyl)-3-((4-methoxyphenethyl)amino)-5-((phenylsulfonyl)methylene)-1,5-dihydro-2H-pyrrol-2-one. (4y)**

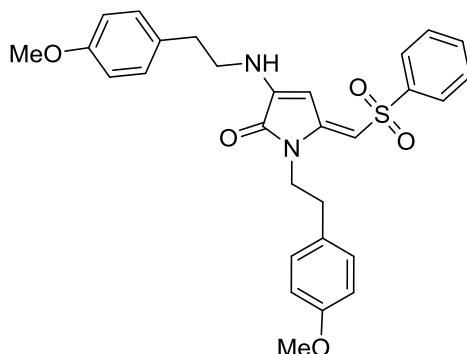

$V_{\text{Petroleum ether}}/V_{\text{Ethyl acetate}} = 10:1$ ,  $R_f = 0.2$ ; Orange solid: 130 mg (50%), mp = 139–141 °C;  $^1\text{H NMR}$  (600 MHz,  $\text{DMSO-}d_6$ ):  $\delta = 7.88$  (d,  $J = 7.3$  Hz, 2H, ArH), 7.68–7.65 (m,  $J = 7.3$  Hz, 1H, ArH), 7.63–7.60 (m, 2H, ArH), 7.24 (t,  $J = 5.8$  Hz, 1H, NH), 7.14–7.10 (m, 2H, ArH), 6.99 (d,  $J = 8.2$  Hz, 2H, ArH), 6.87 (d,  $J = 8.5$  Hz, 2H, ArH), 6.74 (d,  $J = 8.4$  Hz, 2H, ArH), 6.18 (s, 1H, C=CH), 5.99 (s, 1H, C=CH), 3.72 (s, 3H,  $\text{ArOCH}_3$ ), 3.70 (m, 2H,  $\text{CH}_2$ ), 3.68 (s, 3H,  $\text{ArOCH}_3$ ), 3.29–3.26 (m, 2H,  $\text{CH}_2$ ), 2.76 (t,  $J = 7.3$  Hz, 2H,  $\text{CH}_2$ ), 2.63 (t,  $J = 7.2$  Hz, 2H,  $\text{CH}_2$ );  $^{13}\text{C NMR}$  (150 MHz,  $\text{DMSO-}d_6$ ):  $\delta = 165.3$ , 158.2, 158.2, 151.7, 144.1, 143.6, 133.2, 131.3, 130.3, 130.2, 130.2, 130.1, 130.1, 129.8, 129.8, 126.6, 126.6, 114.2, 114.2, 114.0, 114.0, 101.1, 86.2, 55.4, 55.4, 45.8, 40.8, 33.6, 33.1; **HRMS** (TOF ES<sup>+</sup>): m/z calcd for  $\text{C}_{29}\text{H}_{31}\text{N}_2\text{O}_5\text{S}$  [(M+H)<sup>+</sup>], 519.1948, found, 519.1948.

**(E)-5-((Phenylsulfonyl)methylene)-1-(((tetrahydrofuran-2-yl)methyl)-3-(((tetrahydrofuran-2-yl)methyl)amino)-1,5-dihydro-2H-pyrrol-2-one. (4z)**

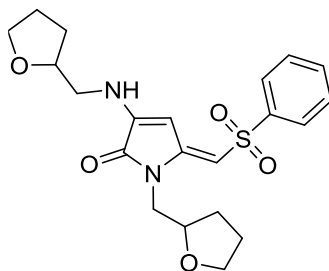

$V_{\text{Petroleum ether}}/V_{\text{Ethyl acetate}} = 3:1$ ,  $R_f = 0.2$ ; Yellow solid: 107 mg (51%), mp = 151–153 °C;  $^1\text{H NMR}$  (600 MHz,  $\text{DMSO-}d_6$ ):  $\delta = 7.89$  (d,  $J = 7.4$  Hz, 2H, ArH), 7.66–7.60 (m, 3H, ArH), 7.20 (t,  $J = 6.2$  Hz, 1H, NH), 6.20 (s, 1H, C=CH), 6.09 (s, 1H, C=CH), 4.02–3.98 (m, 1H, CH), 3.93–3.89 (m, 1H,

CH), 3.77–3.73 (m, 1H, CH<sub>2</sub>), 3.65–3.61 (m, 1H, CH<sub>2</sub>), 3.60–3.55 (m, 2H, CH<sub>2</sub>), 3.53–3.48 (m, 2H, CH<sub>2</sub>), 3.20–3.11 (m, 2H, CH<sub>2</sub>), 1.93–1.89 (m, 1H, CH<sub>2</sub>), 1.87–1.81 (m, 3H, CH<sub>2</sub>), 1.77–1.74 (m, 1H, CH<sub>2</sub>), 1.73–1.69 (m, 1H, CH<sub>2</sub>), 1.60–1.56 (m, 1H, CH<sub>2</sub>), 1.47–1.43 (m, 1H, CH<sub>2</sub>); <sup>13</sup>C NMR (150 MHz, DMSO-*d*<sub>6</sub>): δ = 165.8, 152.2, 144.1, 144.0, 133.2, 129.8, 129.8, 126.6, 126.6, 101.7, 86.7, 77.1, 76.4, 67.6, 67.4, 48.3, 43.32, 29.1, 28.7, 25.6, 25.3; HRMS (TOF ES<sup>+</sup>): *m/z* calcd for C<sub>21</sub>H<sub>27</sub>N<sub>2</sub>O<sub>5</sub>S [(M+H)<sup>+</sup>], 419.1635, found, 419.1635.

**(*E*)-1-(Furan-2-ylmethyl)-3-((furan-2-ylmethyl)amino)-5-((phenylsulfonyl)methylene)-1,5-dihydro-2*H*-pyrrol-2-one. (4a')**

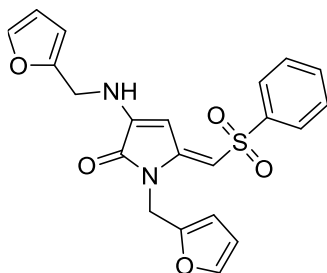

V<sub>Petroleum ether</sub>/V<sub>Ethyl acetate</sub> = 3:1, R<sub>f</sub> = 0.2; Light yellow solid: 84 mg (41%), mp = 150–152 °C; <sup>1</sup>H NMR (600 MHz, DMSO-*d*<sub>6</sub>): δ = 7.82–7.80 (m, 3H, ArH+NH), 7.66–7.64 (m, 1H, ArH), 7.63–7.57 (m, 3H, ArH+C=CH), 7.53–7.51 (m, 1H, C=CH), 6.46–6.45 (m, 1H, C=CH), 6.36–6.34 (m, 2H, C=CH), 6.31 (d, *J* = 2.9 Hz, 1H, C=CH), 6.27 (s, 1H, C=CH), 6.12 (s, 1H, C=CH), 4.75 (s, 2H, CH<sub>2</sub>), 4.33 (m, 2H, CH<sub>2</sub>); <sup>13</sup>C NMR (150 MHz, DMSO-*d*<sub>6</sub>): δ = 165.2, 151.1, 151.0, 149.9, 143.8, 143.2, 143.2, 143.1, 133.3, 129.9, 129.9, 126.6, 126.6, 110.9, 110.9, 108.8, 108.7, 102.4, 88.3, 40.5, 36.0; HRMS (TOF ES<sup>+</sup>): *m/z* calcd for C<sub>21</sub>H<sub>19</sub>N<sub>2</sub>O<sub>5</sub>S [(M+H)<sup>+</sup>], 411.1009, found, 411.1009.

**(*E*)-5-((Methylsulfonyl)methylene)-1-(*p*-tolyl)-3-(*p*-tolylamino)-1,5-dihydro-2*H*-pyrrol-2-one. (5a)**

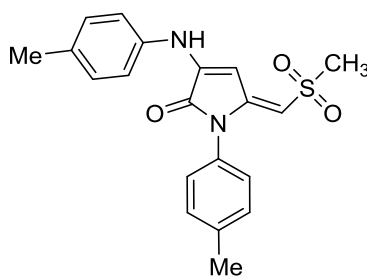

V<sub>Petroleum ether</sub>/V<sub>Ethyl acetate</sub> = 18:1, R<sub>f</sub> = 0.2; Yellow solid: 153 mg (83%), mp = 242–244 °C; <sup>1</sup>H NMR (600 MHz, CDCl<sub>3</sub>): δ = 7.32 (d, *J* = 7.9 Hz, 2H, ArH), 7.20 (s, 1H, NH), 7.19 (s, 1H, ArH), 7.15 (d, *J* = 8.1 Hz, 2H, ArH), 7.13–7.10 (m, 3H, ArH), 6.96 (s, 1H, C=CH), 5.62 (s, 1H, C=CH), 3.04 (s, 3H, CH<sub>3</sub>), 2.43 (s, 3H, ArCH<sub>3</sub>), 2.35 (s, 3H, ArCH<sub>3</sub>); <sup>13</sup>C NMR (150 MHz, CDCl<sub>3</sub>): δ = 165.9, 153.1, 139.5, 136.3, 136.2, 133.6, 130.5, 130.5, 130.3, 130.3, 129.7, 128.0, 128.0, 118.4, 118.4, 104.1, 91.4, 45.4, 21.3, 20.9; HRMS (TOF ES<sup>+</sup>): *m/z* calcd for C<sub>20</sub>H<sub>21</sub>N<sub>2</sub>O<sub>3</sub>S [(M+H)<sup>+</sup>], 369.1267, found, 369.1268.

**(*E*)-5-((Ethylsulfonyl)methylene)-1-(*p*-tolyl)-3-(*p*-tolylamino)-1,5-dihydro-2*H*-pyrrol-2-one. (5b)**

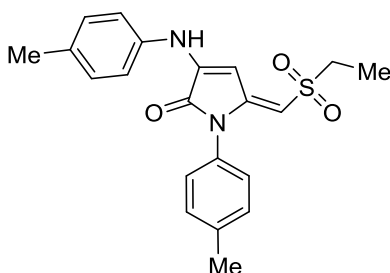

$V_{\text{Petroleum ether}}/V_{\text{Ethyl acetate}} = 4:1$ ,  $R_f = 0.2$ ; Yellow solid: 31 mg (0.1 mmol, 80%), mp = 221–223 °C;  $^1\text{H NMR}$  (600 MHz,  $\text{DMSO-}d_6$ ):  $\delta = 9.39$  (s, 1H, NH), 7.37 (d,  $J = 8.0$  Hz, 2H, ArH), 7.28–7.25 (m, 4H, ArH), 7.22 (d,  $J = 8.2$  Hz, 2H, ArH), 6.80 (s, 1H, C=CH), 5.32 (s, 1H, C=CH), 3.15 (q,  $J = 7.4$  Hz, 2H,  $\text{CH}_2$ ), 2.38 (s, 3H, Ar $\text{CH}_3$ ), 2.28 (s, 3H, Ar $\text{CH}_3$ ), 1.16 (t,  $J = 7.3$  Hz, 3H,  $\text{CH}_3$ );  $^{13}\text{C NMR}$  (150 MHz,  $\text{DMSO-}d_6$ ):  $\delta = 165.6, 153.1, 139.0, 138.0, 137.8, 132.9, 130.6, 130.6, 130.3, 130.3, 128.8, 128.8, 119.7, 119.7, 119.7, 101.2, 91.4, 50.7, 21.2, 20.9, 7.8$ ; **HRMS** (TOF ES+): m/z calcd for  $\text{C}_{21}\text{H}_{23}\text{N}_2\text{O}_3\text{S}$  [(M+H) $^+$ ], 383.1424, found, 383.1423.

**(E)-1-(p-Tolyl)-3-(p-tolylamino)-5-(tosylmethylene)-1,5-dihydro-2H-pyrrol-2-one. (5c)**

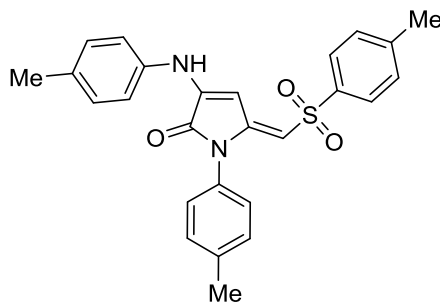

$V_{\text{Petroleum ether}}/V_{\text{Ethyl acetate}} = 18:1$ ,  $R_f = 0.2$ ; Yellow solid: 200mg (90%), mp = 239–241 °C;  $^1\text{H NMR}$  (600 MHz,  $\text{CDCl}_3$ ):  $\delta = 7.77$  (d,  $J = 8.3$  Hz, 2H, ArH), 7.30 (d,  $J = 8.0$  Hz, 2H, ArH), 7.27–7.26 (m, 2H, ArH), 7.23 (d,  $J = 8.1$  Hz, 2H, ArH), 7.16–7.15 (m, 2H, ArH), 7.13 (s, 1H, C=CH), 7.08 (d,  $J = 8.2$  Hz, 2H, ArH), 7.03 (s, 1H, NH), 5.63 (s, 1H, C=CH), 2.41 (s, 3H,  $\text{CH}_3$ ), 2.40 (s, 3H,  $\text{CH}_3$ ), 2.37 (s, 3H,  $\text{CH}_3$ );  $^{13}\text{C NMR}$  (150 MHz,  $\text{CDCl}_3$ ):  $\delta = 165.8, 151.6, 143.9, 139.8, 139.2, 136.5, 135.9, 133.5, 130.3, 130.3, 130.3, 130.3, 129.9, 129.9, 129.7, 127.9, 127.9, 126.9, 126.9, 118.3, 118.3, 105.8, 92.0, 21.6, 21.2, 20.9$ ; **HRMS** (TOF ES+): m/z calcd for  $\text{C}_{26}\text{H}_{25}\text{N}_2\text{O}_3\text{S}$  [(M+H) $^+$ ], 445.1580, found, 445.1580.

**(E)-5-(((4-Chlorophenyl)sulfonyl)methylene)-1-(p-tolyl)-3-(p-tolylamino)-1,5-dihydro-2H-pyrrol-2-one. (5d)**

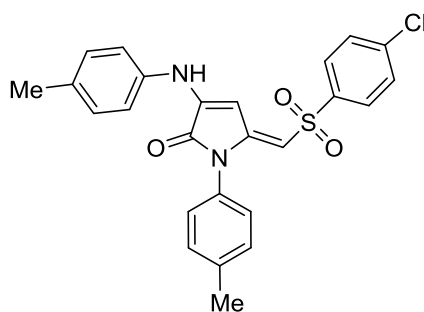

$V_{\text{Petroleum ether}}/V_{\text{Ethyl acetate}} = 18:1$ ,  $R_f = 0.2$ ; Yellow solid: 218 mg (94%), mp = 264–266 °C;  $^1\text{H NMR}$  (600 MHz,  $\text{CDCl}_3$ ):  $\delta = 7.82$  (d,  $J = 8.6$  Hz, 2H, ArH), 7.47 (d,  $J = 8.6$  Hz, 2H, ArH), 7.28 (s, 1H, NH), 7.27 (s, 1H, ArH), 7.23 (d,  $J = 8.1$  Hz, 2H, ArH), 7.14 (d,  $J = 8.3$  Hz, 2H, ArH), 7.11 (s, 1H, C=CH), 7.08 (d,  $J = 8.0$  Hz, 3H, ArH), 5.58 (s, 1H, C=CH), 2.40 (s, 3H, ArCH<sub>3</sub>), 2.37 (s, 3H, ArCH<sub>3</sub>);  $^{13}\text{C NMR}$  (150 MHz,  $\text{CDCl}_3$ ):  $\delta = 163.3, 150.1, 138.9, 137.1, 137.0, 133.9, 133.9, 131.3, 128.0, 128.0, 127.9, 127.9, 127.9, 127.1, 127.1, 125.9, 125.9, 125.5, 125.5, 116.0, 116.0, 102.2, 89.2, 18.8, 18.5$ ; **HRMS** (TOF ES<sup>+</sup>): m/z calcd for  $\text{C}_{25}\text{H}_{22}\text{ClN}_2\text{O}_3\text{S}$  [(M+H)<sup>+</sup>], 465.1034, found, 465.1033.

**(E)-5-(((4-Fluorophenyl)sulfonyl)methylene)-1-(p-tolyl)-3-(p-tolylamino)-1,5-dihydro-2H-pyrrol-2-one. (5e)**

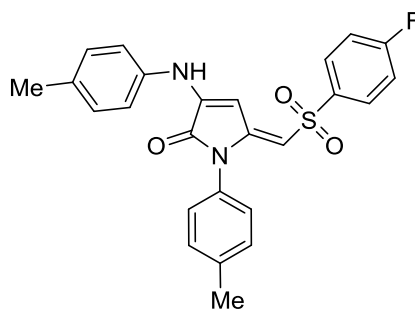

$V_{\text{Petroleum ether}}/V_{\text{Ethyl acetate}} = 10:1$ ,  $R_f = 0.2$ ; Brown yellow solid: 190 mg (85%), mp = 245–247 °C;  $^1\text{H NMR}$  (600 MHz,  $\text{CDCl}_3$ ):  $\delta = 7.92$ –7.85 (m, 2H, ArH), 7.28 (s, 1H, NH), 7.27 (s, 1H, ArH), 7.23 (d,  $J = 8.1$  Hz, 2H, ArH), 7.19–7.16 (m, 2H, ArH), 7.15–7.12 (m, 3H, ArH), 7.11–7.07 (m, 2H, ArH), 7.05 (s, 1H, C=CH), 5.59 (s, 1H, C=CH), 2.40 (s, 3H, ArCH<sub>3</sub>), 2.38 (s, 3H, ArCH<sub>3</sub>);  $^{13}\text{C NMR}$  (600 MHz,  $\text{CDCl}_3$ ):  $\delta = 163.7, 163.2$  ( $J = 253.5$  Hz), 150.1, 137.3, 136.8 (d,  $J = 3.1$  Hz), 134.3, 134.1, 131.6, 128.3, 128.3, 128.2, 128.2, 127.5 (d,  $J = 9.2$  Hz), 127.5 (d,  $J = 9.2$  Hz), 127.5, 125.9, 125.9, 116.3, 116.3, 114.4 (d,  $J = 22.6$  Hz), 114.4 (d,  $J = 22.6$  Hz), 102.9, 89.6, 19.2, 18.8; **HRMS** (TOF ES<sup>+</sup>): m/z calcd for  $\text{C}_{25}\text{H}_{22}\text{N}_2\text{FO}_3\text{S}$  [(M+H)<sup>+</sup>], 449.1330, found, 449.1334.

**(E)-1-Phenyl-3-(phenylamino)-5-(1-(phenylsulfonyl)ethylidene)-1,5-dihydro-2H-pyrrol-2-one (6a)**

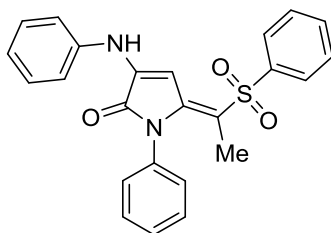

$V_{\text{Petroleum ether}}/V_{\text{Ethyl acetate}} = 13:1$ ,  $R_f = 0.2$ ; Yellow solid: 158 mg (76%), mp = 216–217 °C;  $^1\text{H NMR}$  (600 MHz,  $\text{DMSO-}d_6$ ):  $\delta = 9.24$  (s, 1H, NH), 7.89 (d,  $J = 7.5$  Hz, 2H, ArH), 7.73–7.71 (m, 1H, ArH), 7.68–7.65 (m, 2H, ArH), 7.51–7.48 (m, 2H, ArH), 7.46–7.42 (m, 3H, ArH), 7.40 (s, 1H, C=CH), 7.34 (d,  $J = 7.8$  Hz, 2H, ArH), 7.30 (d,  $J = 7.8$  Hz, 2H, ArH), 7.07 (t,  $J = 7.3$  Hz, 1H, ArH), 1.42 (s, 3H, C-CH<sub>3</sub>).  $^{13}\text{C NMR}$  (150 MHz,  $\text{DMSO-}d_6$ ):  $\delta = 167.4, 147.3, 141.7, 141.0, 136.8, 135.5, 133.9, 130.2, 130.2, 129.9, 129.9, 129.9, 129.9, 129.1, 129.0, 129.0, 127.1, 127.1, 123.1, 119.0, 119.0, 114.0, 97.4, 15.7$ ; **HRMS** (TOF ES<sup>+</sup>): m/z calcd for  $\text{C}_{24}\text{H}_{21}\text{N}_2\text{O}_3\text{S}$  [(M+H)<sup>+</sup>], 417.1267, found, 417.1270.

**(E)-1-Phenyl-3-(phenylamino)-5-(1-(phenylsulfonyl)propylidene)-1,5-dihydro-2H-pyrrol-2-one. (6b)**

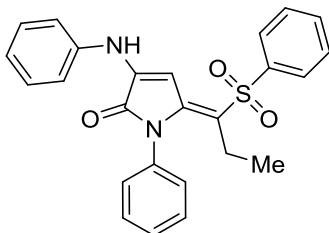

$V_{\text{Petroleum ether}}/V_{\text{Ethyl acetate}} = 10:1$ ,  $R_f = 0.2$ ; Yellow solid: 146 mg (68%), mp = 183–184 °C;  **$^1\text{H NMR}$**  (600 MHz,  $\text{DMSO-}d_6$ ):  $\delta = 9.24$  (s, 1H, NH), 7.90 (d,  $J = 7.3$  Hz, 2H, ArH), 7.73–7.67 (m, 3H, ArH), 7.52–7.47 (m, 3H, ArH), 7.43–7.40 (m, 4H, ArH+C=CH), 7.28–7.26 (m, 3H, ArH), 7.07 (t,  $J = 7.3$  Hz, 1H, ArH), 1.94 (q,  $J = 7.2$  Hz, 2H,  $\text{CH}_2$ ), 0.61 (t,  $J = 7.2$  Hz, 3H,  $\text{CH}_3$ );  **$^{13}\text{C NMR}$**  (150 MHz,  $\text{DMSO-}d_6$ ):  $\delta = 167.5$ , 147.7, 142.9, 140.9, 136.8, 135.3, 133.7, 130.1, 130.1, 129.9, 129.9, 129.9, 129.5, 129.5, 129.5, 129.5, 127.0, 127.0, 123.1, 120.7, 119.0, 119.0, 97.6, 21.3, 15.2; **HRMS** (TOF ES<sup>+</sup>): m/z calcd for  $\text{C}_{25}\text{H}_{23}\text{N}_2\text{O}_3\text{S}$  [(M+H)<sup>+</sup>], 431.1424, found, 431.1434.

**(E)-1-Phenyl-3-(phenylamino)-5-(1-(phenylsulfonyl)undecylidene)-1,5-dihydro-2H-pyrrol-2-one. (6c)**

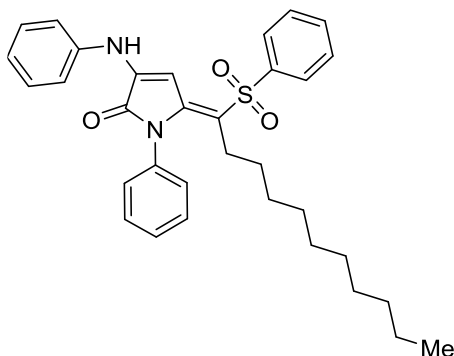

$V_{\text{Petroleum ether}}/V_{\text{Ethyl acetate}} = 15:1$ ,  $R_f = 0.2$ ; Light yellow solid: 217 mg (80%), mp = 154–156 °C;  **$^1\text{H NMR}$**  (600 MHz,  $\text{DMSO-}d_6$ ):  $\delta = 9.21$  (s, 1H, NH), 7.89 (d,  $J = 7.4$  Hz, 2H, ArH), 7.74–7.68 (m, 1H, ArH), 7.68–7.66 (m, 2H, ArH), 7.51–7.46 (m, 3H, ArH), 7.47–7.46 (m, 4H, ArH), 7.26 (s, 2H, ArH), 7.24 (s, 1H, C=CH), 7.06 (t,  $J = 7.3$  Hz, 1H, ArH), 1.88–1.85 (m, 2H,  $\text{CH}_2$ ), 1.27–1.18 (m, 6H,  $\text{CH}_2$ ), 1.14–1.10 (m, 2H,  $\text{CH}_2$ ), 1.07–1.01 (m, 4H,  $\text{CH}_2$ ), 0.92–0.89 (m, 2H,  $\text{CH}_2$ ), 0.72–0.84 (t,  $J = 7.1$  Hz, 3H,  $\text{CH}_3$ ), 0.55–0.51 (m, 2H,  $\text{CH}_2$ );  **$^{13}\text{C NMR}$**  (150 MHz,  $\text{DMSO-}d_6$ ):  $\delta = 167.5$ , 147.5, 142.9, 140.9, 136.6, 135.2, 133.7, 130.1, 130.1, 129.8, 129.8, 129.8, 129.5, 129.5, 129.4, 127.0, 123.1, 119.8, 118.9, 118.9, 97.6, 31.7, 31.7, 30.4, 29.3, 29.2, 29.1, 28.7, 28.2, 22.6, 22.6, 14.5, 14.5; **HRMS** (TOF ES<sup>+</sup>): m/z calcd for  $\text{C}_{33}\text{H}_{39}\text{N}_2\text{O}_3\text{S}$  [(M+H)<sup>+</sup>], 543.2676, found, 543.2677.

**(E)-1-Phenyl-3-(phenylamino)-5-(1-(phenylsulfonyl)pentadecylidene)-1,5-dihydro-2H-pyrrol-2-one. (6d)**

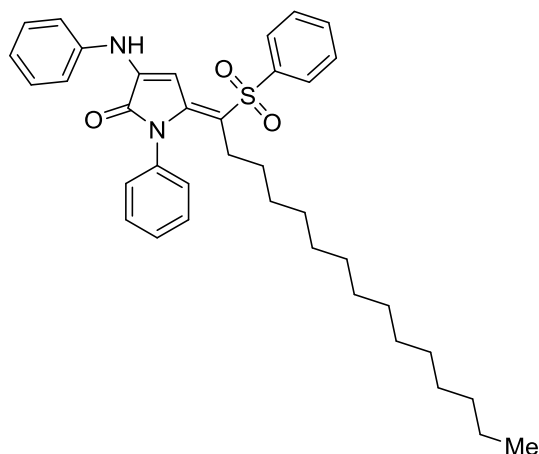

$V_{\text{Petroleum ether}}/V_{\text{Ethyl acetate}} = 15:1$ ,  $R_f = 0.2$ ; Light yellow solid: 188 mg (63%), mp = 158–160 °C;  $^1\text{H NMR}$  (600 MHz,  $\text{DMSO-}d_6$ ):  $\delta = 9.21$  (s, 1H, NH), 7.88 (d,  $J = 7.4$  Hz, 2H, ArH), 7.72–7.69 (m, 1H, ArH), 7.72–7.69 (m, 2H, ArH), 7.49 (d,  $J = 7.4$  Hz, 3H, ArH), 7.42–7.37 (m, 4H, ArH), 7.22 (s, 2H, ArH), 7.24 (s, 1H, ArH, C=CH), 7.06 (t,  $J = 7.3$  Hz, 1H, ArH), 1.87–1.85 (m, 2H,  $\text{CH}_2$ ), 1.27–1.18 (m, 15H,  $\text{CH}_3+\text{CH}_2$ ), 1.14–1.10 (m, 2H,  $\text{CH}_2$ ), 1.06–1.03 (m, 4H,  $\text{CH}_2$ ), 0.92–0.88 (m, 2H,  $\text{CH}_2$ ), 0.86–0.83 (m, 2H,  $\text{CH}_2$ ), 0.56–0.51 (m, 2H,  $\text{CH}_2$ );  $^{13}\text{C NMR}$  (150 MHz,  $\text{DMSO-}d_6$ ):  $\delta = 167.5, 147.58, 142.9, 140.9, 136.6, 135.2, 133.7, 130.0, 130.0, 129.8, 129.8, 129.8, 129.8, 129.5, 129.5, 129.3, 126.9, 126.9, 123.1, 119.8, 118.9, 118.9, 97.6, 31.8, 30.4, 29.5, 29.5, 29.5, 29.5, 29.4, 29.3, 29.2, 29.2, 28.7, 28.2, 22.6, 14.5$ ; **HRMS** (TOF ES+):  $m/z$  calcd for  $\text{C}_{37}\text{H}_{47}\text{N}_2\text{O}_3\text{S}$  [(M+H)<sup>+</sup>], 599.3302, found, 599.3301.

**(E)-1-Phenyl-5-(2-phenyl-1-(phenylsulfonyl)ethylidene)-3-(phenylamino)-1,5-dihydro-2H-pyrrol-2-one. (6e)**

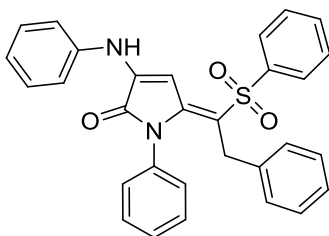

$V_{\text{Petroleum ether}}/V_{\text{Ethyl acetate}} = 13:1$ ,  $R_f = 0.2$ ; Yellow solid: 123 mg (50%), mp = 205–207 °C;  $^1\text{H NMR}$  (600 MHz,  $\text{DMSO-}d_6$ ):  $\delta = 9.34$  (s, 1H, NH), 7.75 (d,  $J = 7.7$  Hz, 2H, ArH), 7.66–7.63 (m, 1H, ArH), 7.59–7.56 (m, 2H, ArH), 7.46–7.44 (m, 2H, ArH), 7.36–7.32 (m, 2H, ArH), 7.31 (s, 1H, C=CH), 7.30–7.24 (m, 3H, ArH), 7.11 (d,  $J = 7.6$  Hz, 6H, ArH), 6.78 (d,  $J = 6.5$  Hz, 2H, ArH), 3.45 (s, 2H,  $\text{CH}_2$ );  $^{13}\text{C NMR}$  (150 MHz,  $\text{DMSO-}d_6$ ):  $\delta = 167.4, 149.2, 142.9, 140.8, 138.7, 135.9, 135.7, 133.7, 129.9, 129.9, 129.9, 129.5, 129.5, 129.3, 129.3, 129.2, 129.2, 128.4, 128.4, 128.1, 128.1, 127.1, 127.1, 126.4, 123.3, 119.2, 119.2, 117.4, 97.3, 33.2$ ; **HRMS** (TOF ES+):  $m/z$  calcd for  $\text{C}_{30}\text{H}_{25}\text{N}_2\text{O}_3\text{S}$  [(M+H)<sup>+</sup>], 493.1580, found 493.1580.

**(E)-1-Phenyl-5-(phenyl(phenylsulfonyl)methylene)-3-(phenylamino)-1,5-dihydro-2H-pyrrol-2-one. (6f)**

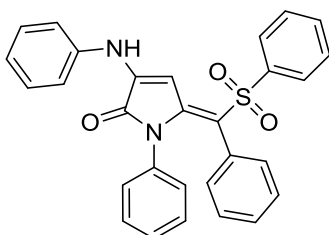

$V_{\text{Petroleum ether}}/V_{\text{Ethyl acetate}} = 13:1$ ,  $R_f = 0.2$ ; Yellow solid: 155 mg (65%), mp = 218–219 °C;  $^1\text{H NMR}$  (600 MHz,  $\text{DMSO-}d_6$ ):  $\delta = 9.40$  (s, 1H, NH), 7.64–7.61 (m 1H, ArH), 7.59 (d,  $J = 7.6$  Hz, 3H, ArH), 7.53 (t,  $J = 7.7$  Hz, 2H, ArH), 7.49–7.46 (m, 2H, ArH), 7.41 (d,  $J = 7.8$  Hz, 2H, ArH), 7.12 (t,  $J = 7.2$  Hz, 1H, ArH), 6.99–6.96 (m, 3H, ArH+C=CH), 6.95–6.92 (m, 1H, ArH), 6.86–6.79 (m, 4H, ArH), 6.72 (d,  $J = 7.4$  Hz, 2H, ArH);  $^{13}\text{C NMR}$  (150 MHz,  $\text{DMSO-}d_6$ ):  $\delta = 167.6, 148.7, 141.7, 140.9, 136.3, 135.5, 133.7, 133.5, 113.5, 131.0, 129.9, 129.9, 129.7, 129.7, 129.5, 129.5, 128.6, 128.6, 128.4, 127.7, 127.4, 127.4, 127.4, 127.4, 123.4, 119.5, 119.3, 119.3, 96.8$ ; **HRMS** (TOF ES+): m/z calcd for  $\text{C}_{29}\text{H}_{23}\text{N}_2\text{O}_3\text{S}$  [(M+H)<sup>+</sup>], 479.1424, found, 479.1434.

**(E)-5-((4-Chlorophenyl)(phenylsulfonyl)methylene)-1-phenyl-3-(phenylamino)-1,5-dihydro-2H-pyrrol-2-one. (6g)**

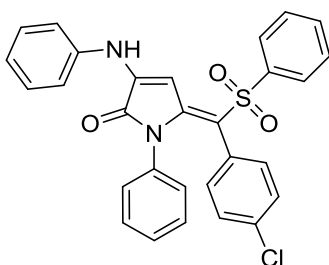

$V_{\text{Petroleum ether}}/V_{\text{Ethyl acetate}} = 13:1$ ,  $R_f = 0.2$ ; Yellow solid: 159 mg (62%), mp = 248–250 °C;  $^1\text{H NMR}$  (600 MHz,  $\text{DMSO-}d_6$ ):  $\delta = 9.45$  (s, 1H, NH), 7.66–7.63 (m, 1H, ArH), 7.62–7.60 (m, 2H, ArH), 7.57–7.54 (m, 3H, ArH), 7.49–7.46 (m, 2H, ArH), 7.42 (s, 1H, C=CH), 7.40 (s, 1H, ArH), 7.13–7.11 (m, 1H, ArH), 7.08–7.05 (m 1H, ArH), 7.03–7.01 (m, 2H, ArH), 6.87 (dd,  $J = 7.8, 3.4$  Hz, 4H, ArH), 6.72 (d,  $J = 8.4$  Hz, 2H, ArH);  $^{13}\text{C NMR}$  (150 MHz,  $\text{DMSO-}d_6$ ):  $\delta = 167.5, 149.2, 141.5, 140.8, 136.5, 135.5, 135.2, 135.2, 133.8, 133.5, 130.1, 129.9, 129.9, 129.9, 129.9, 129.9, 129.8, 129.7, 128.7, 128.7, 127.8, 127.4, 127.4, 127.4, 123.5, 119.4, 119.4, 117.8, 96.5$ ; **HRMS** (TOF ES+): m/z calcd for  $\text{C}_{29}\text{H}_{22}\text{ClN}_2\text{O}_3\text{S}$  [(M+H)<sup>+</sup>], 513.1034, found, 513.1039.

**1,4-Diphenyl-3-(phenylamino)-5-((phenylsulfonyl)methylene)-1,5-dihydro-2H-pyrrol-2-one. (7a)**

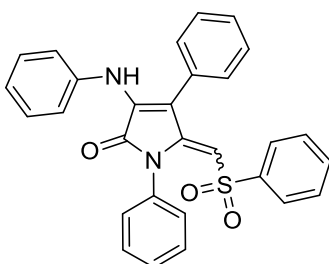

$V_{\text{Petroleum ether}}/V_{\text{Ethyl acetate}} = 13:1$ ,  $R_f = 0.2$ ; Yellow solid: 162 mg (68%),  $Z/E = 11/1$ , mp = 234–235 °C; **Major:**  $^1\text{H NMR}$  (600 MHz,  $\text{DMSO-}d_6$ )  $\delta = 9.12$  (s, 1H, NH), 7.60–7.58 (m, 1H, ArH),



7.44–7.41 (m, 2H, ArH), 7.36–7.32 (m, 1H, ArH), 7.29 (d,  $J = 7.4$  Hz, 2H, ArH), 7.25–7.17 (m, 5H, ArH), 7.10–7.08 (m, 4H, ArH), 6.87–6.84 (m, 2H, ArH), 6.78–6.75 (m, 1H, ArH), 6.70 (d,  $J = 7.5$  Hz, 2H, ArH), 5.68 (s, 1H, C=CH);  $^{13}\text{C NMR}$  (150 MHz, DMSO- $d_6$ ):  $\delta = 168.2$ , 151.2 (minor), 150.2, 143.4 (minor), 142.8, 138.6, 138.1 (minor), 137.6 (minor), 136.4, 135.1 (minor), 133.6 (minor), 133.2, 132.8 (minor), 132.6, 131.6 (minor), 131.2, 131.1 (minor), 130.3 (minor), 130.2, 130.2, 129.8 (minor), 129.5, 129.5, 129.3 (minor), 129.2, 129.2, 128.8, 128.8, 128.5, 128.5, 128.5, 128.4, 128.0, 128.0, 127.9 (minor), 127.4 (minor), 126.1, 126.1, 123.8 (minor), 123.2, 121.7, 121.7, 113.0, 104.7; **HRMS** (TOF ES $^+$ ):  $m/z$  calcd for  $\text{C}_{29}\text{H}_{23}\text{N}_2\text{O}_3\text{S}$  [(M+H) $^+$ ], 479.1424, found, 479.1425.

**(E)-1-Phenyl-3-(phenylamino)-5-((phenylsulfonyl)methylene)-4-(*p*-tolyl)-1,5-dihydro-2H-pyrrol-2-one. (7b)**

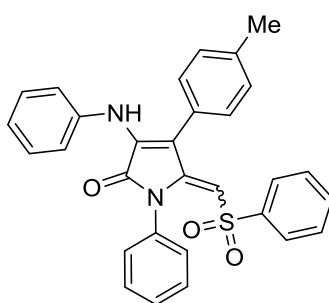

$V_{\text{Petroleum ether}}/V_{\text{Ethyl acetate}} = 13:1$ ,  $R_f = 0.2$ ; Yellow solid: 133 mg (54%),  $Z/E = 9/1$ ,  $mp = 223\text{--}225$  °C; **Major**:  $^1\text{H NMR}$  (600 MHz, DMSO- $d_6$ )  $\delta = 9.05$  (s, 1H, NH), 7.62–7.58 (m, 1H, ArH), 7.44–7.42 (m, 2H, ArH), 7.34–7.32 (m, 1H, ArH), 7.29 (d,  $J = 7.8$  Hz, 2H, ArH), 7.23–7.20 (m, 2H, ArH), 7.08 (d,  $J = 7.7$  Hz, 2H, ArH), 7.03 (d,  $J = 7.9$  Hz, 2H, ArH), 6.99 (d,  $J = 7.9$  Hz, 2H, ArH), 6.89–6.86 (m, 2H, ArH), 6.79–6.77 (m, 1H, ArH), 6.71 (d,  $J = 7.8$  Hz, 2H, ArH), 5.69 (s, 1H, C=CH), 2.24 (s, 3H, ArCH $_3$ ).  $^{13}\text{C NMR}$  (150 MHz, DMSO- $d_6$ ):  $\delta = 168.2$ , 165.1 (minor), 151.2 (minor), 150.2, 143.3 (minor), 142.8, 138.8, 138.8 (minor), 137.8, 137.6 (minor), 136.4, 133.6 (minor), 133.2, 132.4, 130.9 (minor), 130.3 (minor), 130.0, 130.0, 129.8 (minor), 129.5, 129.5, 129.2, 129.2, 129.2, 128.8, 128.8, 128.5, 128.2, 128.0, 128.0, 127.8 (minor), 126.1, 126.1, 126.0 (minor), 123.5 (minor), 123.0, 122.9 (minor), 109.6 (minor), 107.6 (minor), 121.4, 121.4, 113.8, 104.9, 21.3; **HRMS** (TOF ES $^+$ ):  $m/z$  calcd for  $\text{C}_{30}\text{H}_{25}\text{N}_2\text{O}_3\text{S}$  [(M+H) $^+$ ], 493.1580, found, 493.1579.

**(Z)-1-Phenyl-3-(phenylamino)-5-((phenylsulfonyl)methylene)-4-(*m*-tolyl)-1,5-dihydro-2H-pyrrol-2-one. (7c)**

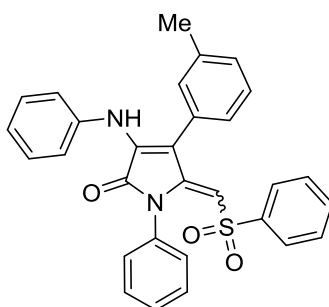

V<sub>Petroleum ether</sub>/V<sub>Ethyl acetate</sub> = 10:1, R<sub>f</sub> = 0.2; Yellow solid: 128 mg (52%), Z/E = 6/1, mp = 209–211 °C; **Major:** <sup>1</sup>H NMR (600 MHz, DMSO-*d*<sub>6</sub>) δ = 9.11 (s, 1H, NH), 7.59–7.58 (m, 1H, ArH), 7.43 (t, *J* = 7.8 Hz, 2H, ArH), 7.33–7.29 (m, 3H, ArH), 7.23–7.21 (m, 2H, ArH), 7.13 (t, *J* = 7.6 Hz, 1H, ArH), 7.09 (d, *J* = 7.5 Hz, 2H, ArH), 7.02 (d, *J* = 7.5 Hz, 1H, ArH), 6.95 (d, *J* = 7.5 Hz, 1H, ArH), 6.88–6.86 (m, 2H, ArH), 6.79–6.77 (m, 2H, ArH), 6.69 (d, *J* = 7.7 Hz, 2H, ArH), 5.71 (s, 1H, C=CH), 2.08 (s, 3H, ArCH<sub>3</sub>); <sup>13</sup>C NMR (150 MHz, DMSO-*d*<sub>6</sub>): δ = 168.1, 150.1, 142.9, 138.7, 137.7, 136.4, 133.2, 132.6, 131.2, 130.9, 130.3 (minor), 129.8 (minor), 129.5, 129.5, 129.2, 129.2, 128.9, 128.8, 128.8, 128.5, 128.4, 127.9, 127.9, 127.7 (minor), 127.2 (minor), 127.1, 126.1, 126.1, 125.9 (minor), 123.3, 123.0 (minor), 121.8, 121.8, 113.0, 104.8, 21.2; **HRMS** (TOF ES<sup>+</sup>): *m/z* calcd for C<sub>30</sub>H<sub>25</sub>N<sub>2</sub>O<sub>3</sub>S [(M+H)<sup>+</sup>], 493.1580, found, 493.1579.

**(Z)-4-(4-Fluorophenyl)-1-phenyl-3-(phenylamino)-5-((phenylsulfonyl)methylene)-1,5-dihydro-2H-pyrrol-2-one. (7d)**

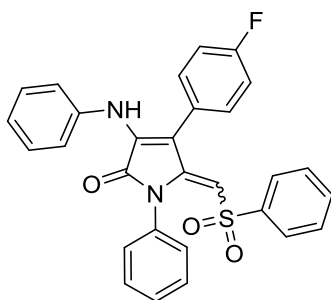

V<sub>Petroleum ether</sub>/V<sub>Ethyl acetate</sub> = 9:1, R<sub>f</sub> = 0.2; Yellow solid: 82 mg (33%), Z/E = 3/1, mp = 221–223 °C; **Major:** <sup>1</sup>H NMR (600 MHz, DMSO-*d*<sub>6</sub>): δ = 9.16 (s, 1H, NH), 7.63–7.56 (m, 2H, ArH), 7.44–7.41 (m, 2H, ArH), 7.30–7.26 (m, 2H, ArH), 7.22–7.20 (m, 2H, ArH), 7.14–7.10 (m, 2H, ArH), 7.08 (d, *J* = 7.4 Hz, 2H, ArH), 7.04–7.01 (m, 2H, ArH), 6.92–6.89 (m, 2H, ArH), 6.71 (d, *J* = 7.5 Hz, 3H, ArH), 5.64 (s, 1H, C=CH); <sup>13</sup>C NMR (150 MHz, DMSO-*d*<sub>6</sub>): δ = 168.1, 165.0, 162.1 (d, *J* = 245.9 Hz), 150.2, 143.5 (minor), 142.9, 138.5, 138.0 (minor), 136.4, 133.5 (minor), 133.2 (minor), 133.2, 133.1, 133.0 (minor), 132.4 (d, *J* = 8.5 Hz), 132.4 (d, *J* = 8.5 Hz), 130.3 (minor), 129.8, (minor), 129.5, 129.5, 129.3 (minor), 129.2, 129.2, 128.8, 128.8, 128.5 (minor), 128.0, 128.0, 127.9 (minor), 127.6 (d, *J* = 2.7 Hz), 126.1, 126.1, 125.8 (minor), 124.1 (minor), 123.6, 123.4, 122.1, 122.1, 115.5 (d, *J* = 21.5 Hz), 114.1 (minor), 111.8, 107.0 (minor), 104.5; **HRMS** (TOF ES<sup>+</sup>): *m/z* calcd for C<sub>29</sub>H<sub>22</sub>N<sub>2</sub>FO<sub>3</sub>S [(M+H)<sup>+</sup>], 497.1330, found, 497.1342.

**(Z)-4-(4-Chlorophenyl)-1-phenyl-3-(phenylamino)-5-((phenylsulfonyl)methylene)-1,5-dihydro-2H-pyrrol-2-one. (7e)**

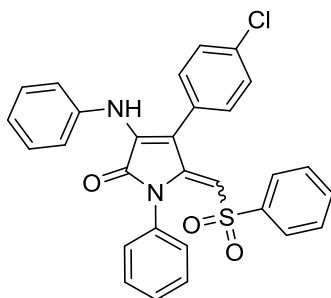

$V_{\text{Petroleum ether}}/V_{\text{Ethyl acetate}} = 13:1$ ,  $R_f = 0.2$ ; Yellow solid: 76 mg (30%),  $Z/E = 3/1$ , mp = 210–212 °C; **Major:**  $^1\text{H NMR}$  (600 MHz,  $\text{DMSO-}d_6$ ):  $\delta = 9.20$  (s, 1H, NH), 7.61–7.58 (m, 1H, ArH), 7.44–7.41 (m, 2H ArH), 7.29 (d,  $J = 7.8$  Hz, 2H, ArH), 7.25 (d,  $J = 8.4$  Hz, 2H, ArH), 7.22 (d,  $J = 7.7$  Hz, 2H, ArH), 7.07 (d,  $J = 7.6$  Hz, 4H, ArH), 6.93–6.90 (m, 2H, ArH), 6.84–6.82 (m, 2H, ArH), 6.75–6.70 (m, 2H, ArH), 5.65 (s, 1H, C=CH);  $^{13}\text{C NMR}$  (150 MHz,  $\text{DMSO-}d_6$ ):  $\delta = 167.9$ , 164.9 (minor), 151.1 (minor), 149.9, 143.3 (minor), 142.8, 138.5, 138.2 (minor), 138.0 (minor), 136.4, 133.5 (minor), 133.2, 133.2, 133.1, 132.9 (minor), 132.4 (minor), 132.0, 132.0, 130.3 (minor), 130.1 (minor), 129.8 (minor), 129.4, 129.4, 129.3, 129.2, 129.2, 128.9, 128.9, 128.5, 128.5, 128.1, 128.1, 128.0 (minor), 127.7, 127.2 (minor), 126.2, 126.2, 125.9, 124.2 (minor), 123.7 (minor), 123.5 (minor), 122.2, 122.2, 111.5, 106.9 (minor), 104.2; **HRMS** (TOF ES+):  $m/z$  calcd for  $\text{C}_{29}\text{H}_{22}\text{ClN}_2\text{O}_3\text{S}$  [(M+H)<sup>+</sup>], 513.1034, found, 513.1043.

**(Z)-4-([1,1'-Biphenyl]-4-yl)-1-phenyl-3-(phenylamino)-5-((phenylsulfonyl)methylene)-1,5-dihydro-2H-pyrrol-2-one. (7f)**

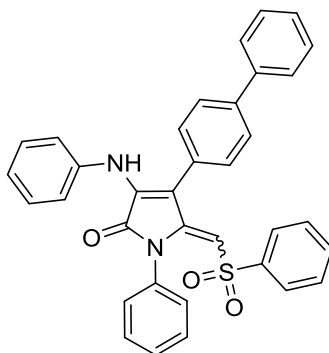

$V_{\text{Petroleum ether}}/V_{\text{Ethyl acetate}} = 9:1$ ,  $R_f = 0.2$ ; Yellow solid: 130 mg (47%),  $Z/E = 5/1$ , mp = 224–226 °C; **Major:**  $^1\text{H NMR}$  (600 MHz,  $\text{DMSO-}d_6$ ):  $\delta = 9.17$  (s, 1H, NH), 7.62–7.61 (m, 3H, ArH), 7.50–7.46 (m, 4H, ArH), 7.43–7.42 (m, 2H, ArH), 7.39–7.37 (m, 1H, ArH), 7.30 (d,  $J = 7.6$  Hz, 2H, ArH), 7.23–7.21 (m, 2H, ArH), 7.17 (d,  $J = 7.8$  Hz, 2H, ArH), 7.10 (d,  $J = 7.7$  Hz, 2H, ArH), 6.88–6.86 (m, 2H, ArH), 6.74 (d,  $J = 8.1$  Hz, 2H, ArH), 5.78 (s, 1H, C=CH);  $^{13}\text{C NMR}$  (150 MHz,  $\text{DMSO-}d_6$ ):  $\delta = 168.1$ , 165.0 (minor), 151.2 (minor), 150.1, 143.3 (minor), 142.8, 140.0, 139.9, 138.7, 138.2 (minor), 137.9 (minor), 136.4, 133.6 (minor), 133.2, 132.9, 132.8 (minor), 131.6 (minor), 130.7, 130.7, 130.3 (minor), 130.3, 129.8 (minor), 129.5, 129.5, 129.4 (minor), 129.5, 129.5, 129.2, 129.4, 128.9, 128.9, 128.5, 128.1 (minor), 128.0, 128.0, 127.8 (minor), 127.1, 127.1, 127.0, 126.7, 126.7, 126.1, 126.1, 125.9 (minor), 125.6 (minor), 123.8 (minor), 123.4 (minor), 123.2, 121.9, 121.9, 112.8, 108.1 (minor), 104.7; **HRMS** (TOF ES+):  $m/z$  calcd for  $\text{C}_{35}\text{H}_{27}\text{N}_2\text{O}_3\text{S}$  [(M+H)<sup>+</sup>], 555.1737, found, 555.1737.

**Methyl(Z)-4-(5-oxo-1-phenyl-4-(phenylamino)-2-((phenylsulfonyl)methylene)-2,5-dihydro-1H-pyrrol-3-yl)benzoate. (7g)**

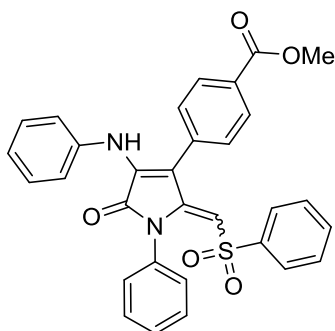

$V_{\text{Petroleum ether}}/V_{\text{Ethyl acetate}} = 8:1$ ,  $R_f = 0.2$ ; Yellow solid: 93 mg (37%),  $Z/E = 3/1$ , mp = 230–232 °C; **Major:**  $^1\text{H NMR}$  (600 MHz, DMSO- $d_6$ )  $\delta = 9.30$  (s, 1H, NH), 7.74 (d,  $J = 7.0$  Hz, 2H, ArH), 7.60–7.58 (m, 2H, ArH), 7.44–7.41 (m, 2H, ArH), 7.30–7.29 (m, 3H, ArH), 7.22 (d,  $J = 6.2$  Hz, 4H, ArH), 7.09 (d,  $J = 6.8$  Hz, 2H, ArH), 6.87–6.85 (m, 2H, ArH), 6.72 (d,  $J = 7.2$  Hz, 2H, ArH), 5.67 (s, 1H, C=CH), 3.83 (s, 3H, OCH<sub>3</sub>);  $^{13}\text{C NMR}$  (150 MHz, DMSO- $d_6$ ):  $\delta = 167.9$ , 166.3, 149.7, 142.8, 142.2 (minor), 138.5, 138.1 (minor), 137.9 (minor), 137.2 (minor), 136.4, 136.4, 133.5, 133.2, 133.1 (minor), 131.3, 130.6, 130.6, 130.3 (minor), 129.7 (minor), 129.5, 129.5, 129.4 (minor), 129.2, 129.2, 129.2, 129.2, 128.9, 128.9, 128.9, 128.9, 128.5, 128.1, 128.1, 127.9 (minor), 126.2, 126.2, 126.0 (minor), 123.7 (minor), 123.6 (minor), 122.2, 111.1, 104.5, 52.7; **HRMS** (TOF ES<sup>+</sup>): m/z calcd for C<sub>31</sub>H<sub>25</sub>N<sub>2</sub>O<sub>5</sub>S [(M+H)<sup>+</sup>], 537.1479, found, 537.1480.

**1-Phenyl-3-(phenylamino)-7-(phenylsulfonyl)-1,4,5,6-tetrahydro-2H-indol-2-one. (8a)**

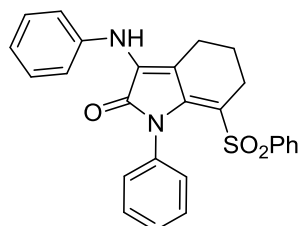

$V_{\text{Petroleum ether}}/V_{\text{Ethyl acetate}} = 8:1$ ,  $R_f = 0.2$ ; Yellow solid: 106 mg (48%), mp = 199–201 °C;  $^1\text{H NMR}$  (600 MHz, DMSO- $d_6$ )  $\delta = 8.60$  (s, 1H, NH), 7.63–7.61 (t,  $J = 7.4$  Hz, 1H, ArH), 7.47–7.44 (m 2H, ArH), 7.30–7.26 (m, 5H, ArH), 7.23–7.21 (m, 2H, ArH), 7.03 (dd,  $J = 12.8$ , 7.7 Hz, 4H, ArH), 6.98–6.96 (t,  $J = 7.4$  Hz, 1H, ArH), 2.51 (d,  $J = 2.0$  Hz, 2H, CH<sub>2</sub>), 2.18–2.16 (t,  $J = 6.2$  Hz, 2H, CH<sub>2</sub>), 1.81–1.62 (m, 2H, CH<sub>2</sub>);  $^{13}\text{C NMR}$  (150 MHz, DMSO- $d_6$ ):  $\delta = 169.2$ , 145.5, 141.3, 141.1, 138.7, 133.5, 129.6, 129.6, 129.2, 129.1, 129.1, 128.6, 128.6, 128.5, 128.5, 127.5, 126.8, 126.8, 122.5, 120.6, 120.6, 117.8, 115.4, 28.1, 24.8, 22.5; **HRMS** (TOF ES<sup>+</sup>): m/z calcd for C<sub>26</sub>H<sub>23</sub>N<sub>2</sub>O<sub>3</sub>S [(M+H)<sup>+</sup>], 443.1424, found, 443.1429.

**7-(Phenylsulfonyl)-1-(*p*-tolyl)-3-(*p*-tolylamino)-1,4,5,6-tetrahydro-2H-indol-2-one.(8b)**

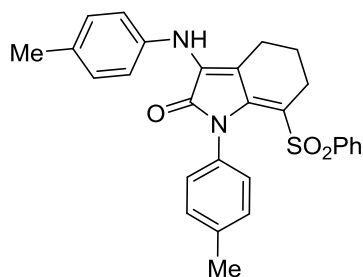

$V_{\text{Petroleum ether}}/V_{\text{Ethyl acetate}} = 8:1$ ,  $R_f = 0.2$ ; Yellow solid: 102 mg (46%), mp = 206–208 °C;  $^1\text{H NMR}$  (600 MHz,  $\text{DMSO-}d_6$ )  $\delta = 8.49$  (s, 1H, NH), 7.61–7.58 (m, 1H, ArH), 7.44–7.41 (m, 2H, ArH), 7.22 (d,  $J = 7.6$  Hz, 2H, ArH), 7.09 (d,  $J = 8.1$  Hz, 2H, ArH), 6.95–6.93 (m, 4H, ArH), 6.86 (d,  $J = 8.1$  Hz, 2H, ArH), 2.55 (t,  $J = 5.9$  Hz, 2H,  $\text{CH}_2$ ), 2.31 (s, 3H,  $\text{CH}_3$ ), 2.25 (s, 3H,  $\text{CH}_3$ ), 2.12 (t,  $J = 6.2$  Hz, 2H,  $\text{CH}_2$ ), 1.76–1.65 (m, 2H,  $\text{CH}_2$ );  $^{13}\text{C NMR}$  (150 MHz,  $\text{DMSO-}d_6$ ):  $\delta = 169.5$ , 146.4, 141.8, 138.2, 136.8, 135.8, 133.2, 131.8, 129.6, 129.5, 129.5, 129.4, 129.4, 129.0, 129.0, 128.4, 128.4, 126.5, 126.5, 121.3, 121.3, 115.7, 114.7, 28.2, 24.7, 22.5, 21.2, 20.8; **HRMS** (TOF  $\text{ES}^+$ ):  $m/z$  calcd for  $\text{C}_{28}\text{H}_{27}\text{N}_2\text{O}_3\text{S}$   $[(\text{M}+\text{H})^+]$ , 471.1737, found, 471.1737.

**1-(4-Methoxyphenyl)-3-((4-methoxyphenyl)amino)-7-(phenylsulfonyl)-1,4,5,6-tetrahydro-2H-indol-2-one.(8c)**

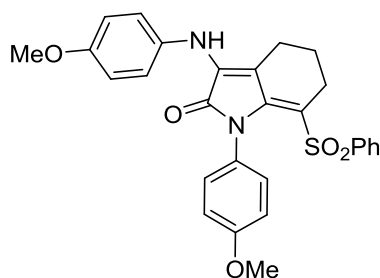

$V_{\text{Petroleum ether}}/V_{\text{Ethyl acetate}} = 8:1$ ,  $R_f = 0.2$ ; Yellow solid: 80 mg (32%), mp = 195–197 °C;  $^1\text{H NMR}$  (600 MHz,  $\text{DMSO-}d_6$ ):  $\delta = 8.39$  (s, 1H, NH), 7.60–7.57 (m, 1H, ArH), 7.42–7.40 (m, 2H, ArH), 7.27–7.19 (m, 2H, ArH), 7.05–6.98 (m, 2H, ArH), 6.90–6.81 (m, 4H, ArH), 6.66 (d,  $J = 8.9$  Hz, 1H, ArH), 3.75 (s, 3H, ArOMe), 3.73 (s, 3H, ArOMe), 2.56 (t,  $J = 5.8$  Hz, 2H,  $\text{CH}_2$ ), 2.07 (t,  $J = 6.3$  Hz, 2H,  $\text{CH}_2$ ), 1.75–1.62 (m, 2H,  $\text{CH}_2$ );  $^{13}\text{C NMR}$  (150 MHz,  $\text{DMSO-}d_6$ ):  $\delta = 169.6$ , 158.6, 155.8, 146.9, 142.2, 133.6, 133.2, 130.9, 130.3, 130.0, 130.0, 129.4, 129.4, 126.1, 126.1, 123.8, 123.8, 114.2, 114.2, 113.8, 113.6, 113.6, 113.2, 55.7, 55.6, 28.4, 24.4, 22.7; **HRMS** (TOF  $\text{ES}^+$ ):  $m/z$  calcd for  $\text{C}_{28}\text{H}_{27}\text{N}_2\text{O}_5\text{S}$   $[(\text{M}+\text{H})^+]$ , 503.1635, found, 503.1636.

**1-(4-Chlorophenyl)-3-((4-chlorophenyl)amino)-7-(phenylsulfonyl)-1,4,5,6-tetrahydro-2H-indol-2-one.(8d)**

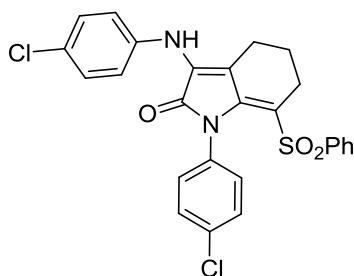

$V_{\text{Petroleum ether}}/V_{\text{Ethyl acetate}} = 8:1$ ,  $R_f = 0.2$ ; Yellow solid: 76 mg (30%), mp = 227–229 °C;  $^1\text{H NMR}$  (600 MHz,  $\text{DMSO-}d_6$ )  $\delta = 8.75$  (s, 1H, NH), 7.67–7.65 (m, 1H, ArH), 7.51–7.49 (m, 2H, ArH), 7.39 (d,  $J = 7.9$  Hz, 2H, ArH), 7.31 (d,  $J = 8.6$  Hz, 2H, ArH), 7.24 (d,  $J = 8.5$  Hz, 2H, ArH), 7.08 (d,  $J = 8.5$  Hz, 2H, ArH), 7.00 (d,  $J = 8.6$  Hz, 2H, ArH), 2.48 (d,  $J = 6.4$  Hz, 2H,  $\text{CH}_2$ ), 2.18 (t,  $J = 6.2$  Hz, 2H,  $\text{CH}_2$ ), 1.95–1.67 (m, 2H,  $\text{CH}_2$ );  $^{13}\text{C NMR}$  (150 MHz,  $\text{DMSO-}d_6$ ):  $\delta = 168.8$ , 144.9, 141.4, 140.2, 137.3, 133.6, 132.1, 130.3, 130.3, 129.6, 129.6, 128.9, 128.9, 128.8, 128.5, 128.5, 126.6, 126.6, 125.8, 121.7, 121.7, 119.5, 116.0, 28.2, 24.7, 22.4; **HRMS** (TOF  $\text{ES}^+$ ):  $m/z$  calcd for  $\text{C}_{26}\text{H}_{21}\text{Cl}_2\text{N}_2\text{O}_3\text{S}$   $[(\text{M}+\text{H})^+]$ , 511.0644, found, 511.0649.

**5-Methylene-1-(*p*-tolyl)-3-(*p*-tolylamino)-1,5-dihydro-2*H*-pyrrol-2-one.(10)**

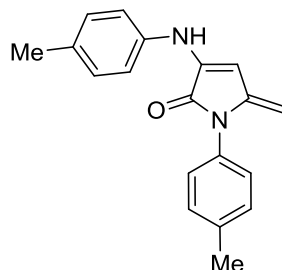

$V_{\text{Petroleum ether}}/V_{\text{Ethyl acetate}} = 25:1$ ,  $R_f = 0.2$ ; Gray-yellow solid: 77 mg (53%), mp = 153–155 °C;  **$^1\text{H NMR}$**  (600 MHz,  $\text{DMSO-}d_6$ )  $\delta = 8.52$  (s, 1H, NH), 7.33 (d,  $J = 8.1$  Hz, 2H, ArH), 7.26 (d,  $J = 8.4$  Hz, 2H, ArH), 7.20 (d,  $J = 8.2$  Hz, 2H, ArH), 7.13 (d,  $J = 8.3$  Hz, 2H, ArH), 6.48 (s, 1H, C=CH), 4.72 (s, 1H, C=CH<sub>2</sub>), 4.43 (s, 1H, C=CH<sub>2</sub>), 2.37 (s, 3H, ArCH<sub>3</sub>), 2.26 (s, 3H, ArCH<sub>3</sub>);  **$^{13}\text{C NMR}$**  (150 MHz,  $\text{DMSO-}d_6$ ):  $\delta = 166.0, 145.8, 139.4, 137.7, 133.9, 131.9, 130.5, 130.2, 130.2, 130.0, 130.0, 128.2, 128.2, 118.0, 118.0, 98.9, 92.3, 21.2, 20.8$ ; **HRMS** (TOF ES<sup>+</sup>): m/z calcd for C<sub>19</sub>H<sub>19</sub>N<sub>2</sub>O [(M+H)<sup>+</sup>], 291.1492, found, 291.1491.

**Ethyl (Z)-2-oxo-4-(phenylamino)pent-3-enoate.(12)**

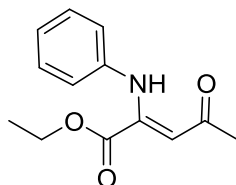

$V_{\text{Petroleum ether}}/V_{\text{Ethyl acetate}} = 25:1$ ,  $R_f = 0.2$ ; Yellow oli: 89 mg (76%);  **$^1\text{H NMR}$**  (600 MHz,  $\text{CDCl}_3$ ):  $\delta = 11.44$  (s, 1H, NH), 7.29 (dd,  $J = 15.1, 7.0$  Hz, 2H, ArH), 7.14 (t,  $J = 7.4$  Hz, 1H, ArH), 6.97 (d,  $J = 7.9$  Hz, 2H, ArH), 5.69 (s, 1H, CH=CH), 4.14 (q,  $J = 7.1$  Hz, 2H, CH<sub>2</sub>), 2.22 (s, 3H, Me), 1.07 (s, 1H, Me);  **$^{13}\text{C NMR}$**  (150 MHz,  $\text{CDCl}_3$ ):  $\delta = 199.3, 164.5, 148.3, 139.6, 129.1, 129.1, 128.8, 125.0, 121.8, 100.0, 62.1, 30.2, 13.6$ ; **HRMS** (TOF ES<sup>+</sup>): m/z calcd for C<sub>13</sub>H<sub>17</sub>NO<sub>3</sub> [(M+H)<sup>+</sup>], 234.1125, found, 234.1133.

***N*-((2*Z*,4*E*)-4-(Phenylimino)pent-2-en-2-yl)aniline.(13)**

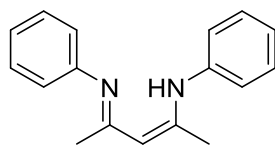

Light yellow solid: 1.38 g (86%);  **$^1\text{H NMR}$**  (600 MHz,  $\text{CDCl}_3$ ):  $\delta = 12.71$  (s, 1H, NH), 7.33–7.22 (m, 4H, ArH), 7.05 (t,  $J = 7.3$  Hz, 2H, ArH), 6.96 (d,  $J = 8.0$  Hz, 4H, ArH), 4.88 (s, 1H, CH=CH), 2.00 (s, 6H, 2CH<sub>3</sub>);  **$^{13}\text{C NMR}$**  (600 MHz,  $\text{CDCl}_3$ ):  $\delta = 158.3, 158.3, 144.5, 144.5, 127.6, 127.6, 127.6, 127.6, 122.0, 122.0, 121.4, 121.4, 121.4, 121.4, 96.1, 19.7, 19.7$ ; **HRMS** (TOF ES<sup>+</sup>): m/z calcd for C<sub>17</sub>H<sub>19</sub>N<sub>2</sub> [(M+H)<sup>+</sup>], 251.1543, found, 251.1536.

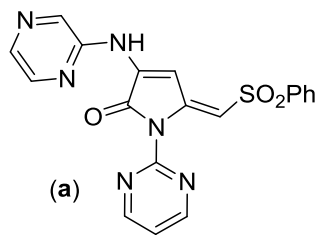

no reaction

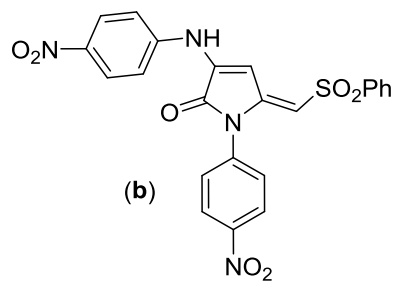

no reaction

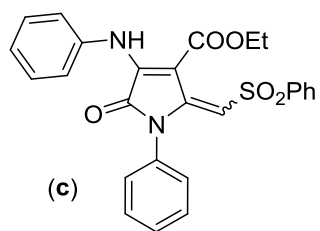

not detected

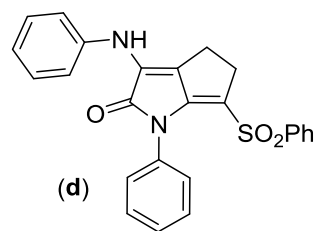

not detected

**Figure S4.** Unsuccessful examples.

## 6. X-ray Structure and Data<sup>3</sup> of 4a (CCDC 2145010).

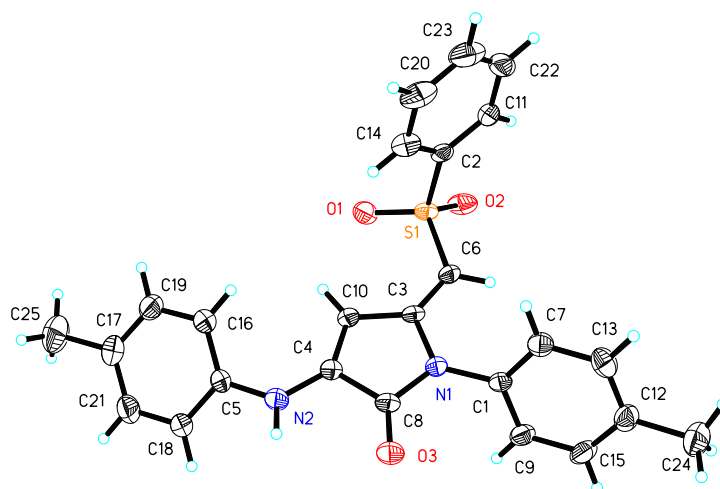

**Figure S5 X-Ray crystal structure of 4a.**

**Table S2** Crystal data and structure refinement for **4a**.

|                                   |                                                                 |                       |
|-----------------------------------|-----------------------------------------------------------------|-----------------------|
| Empirical formula                 | C <sub>25</sub> H <sub>22</sub> N <sub>2</sub> O <sub>3</sub> S |                       |
| Formula weight                    | 430.50                                                          |                       |
| Temperature                       | 296.15 K                                                        |                       |
| Wavelength                        | 0.71073 Å                                                       |                       |
| Crystal system, space group       | monoclinic, P 1 21/c 1                                          |                       |
| Unit cell dimensions              | a = 8.1561(9) Å                                                 | alpha = 90 deg.       |
|                                   | b = 20.032(2) Å                                                 | beta = 95.626(2) deg. |
|                                   | c = 13.5195(15) Å                                               | gamma = 90 deg.       |
| Volume                            | 2198.2(4) Å <sup>3</sup>                                        |                       |
| Z, Calculated density             | 4, 1.301 Mg/m <sup>3</sup>                                      |                       |
| Absorption coefficient            | 0.176 mm <sup>-1</sup>                                          |                       |
| F(000)                            | 904                                                             |                       |
| Theta range for data collection   | 2.51 to 27.27 deg.                                              |                       |
| Limiting indices                  | -10 ≤ h ≤ 10, -25 ≤ k ≤ 26, -16 ≤ l ≤ 17                        |                       |
| Completeness to theta = 25.242    | 99.8%                                                           |                       |
| Absorption correction             | Multi-scan                                                      |                       |
| Refinement method                 | SHELXL-2018/3 (Sheldrick 2015)                                  |                       |
| Data/restraints/parameters        | 4873 / 0 / 282                                                  |                       |
| Goodness-of-fit on F <sup>2</sup> | 1.025                                                           |                       |
| Final R indices [I > 2σ(I)]       | R1 = 0.1292, wR2 = 0.1252                                       |                       |
| R indices (all data)              | R1 = 0.0731, wR2 = 0.1406                                       |                       |
| Largest diff. peak and hole       | 0.453 and -0.281 e.Å <sup>-3</sup>                              |                       |



**7.  $^1\text{H}$  NMR,  $^{13}\text{C}$  NMR and HRMS spectra for spectroscopic data.**

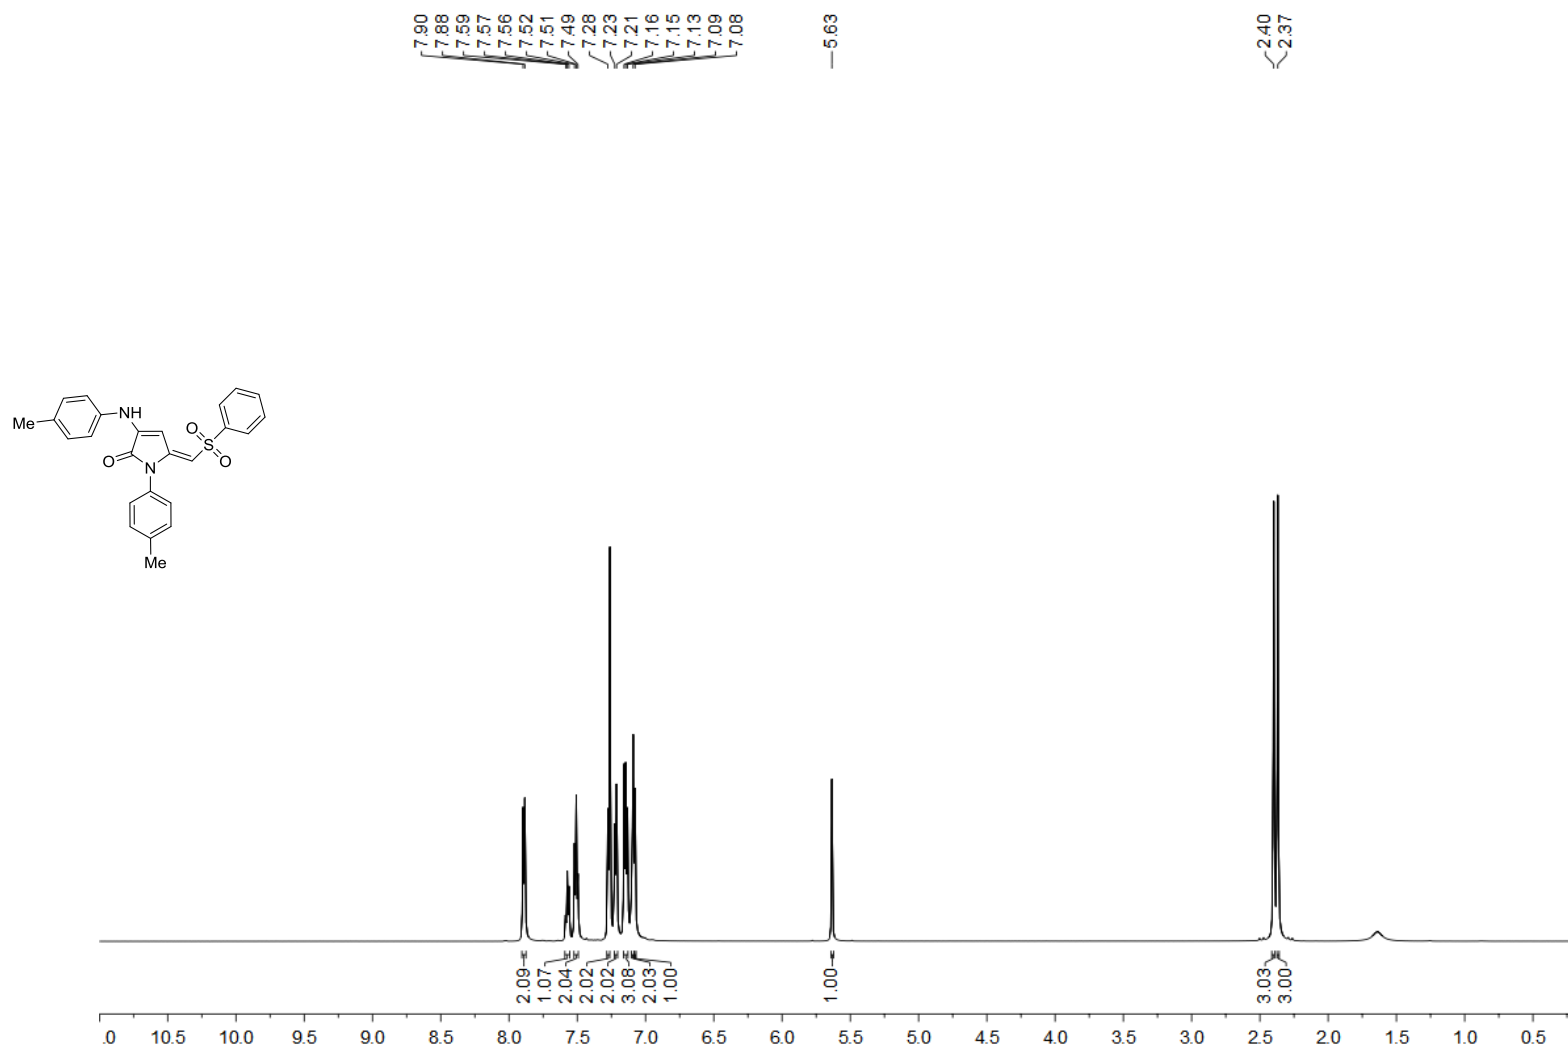

Figure S6. <sup>1</sup>H NMR (600 MHz, CDCl<sub>3</sub>) spectra of compound **4a**

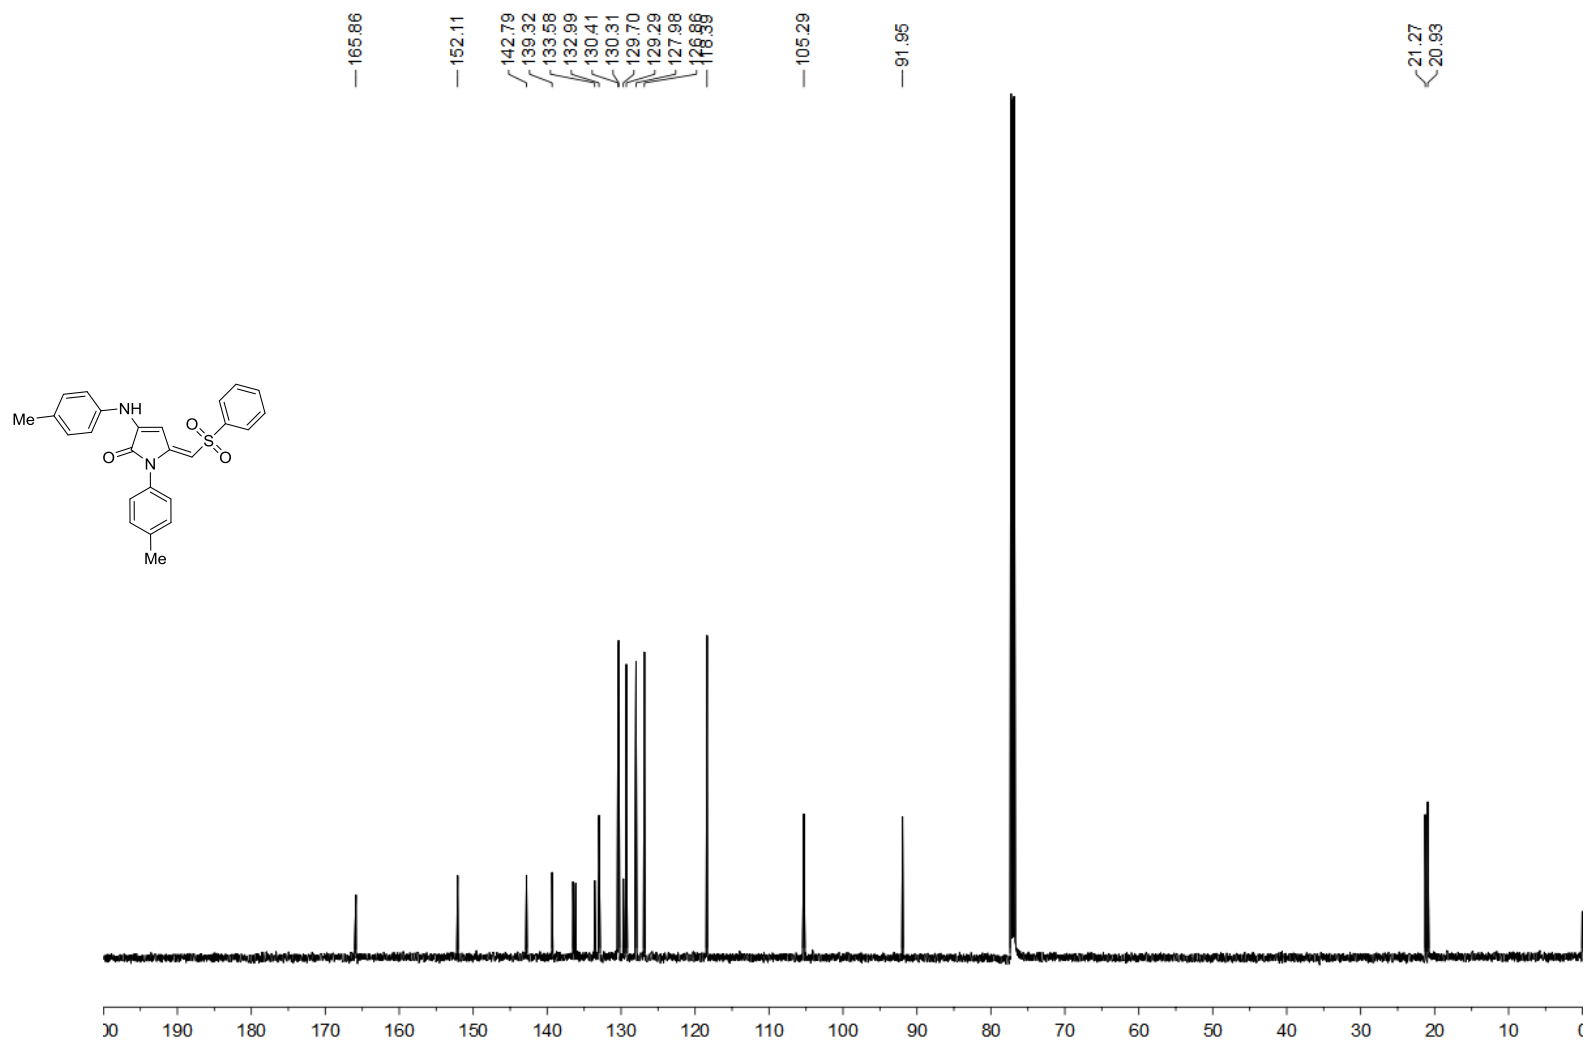

Figure S7. <sup>13</sup>C NMR (150 MHz, CDCl<sub>3</sub>) spectra of compound 4a

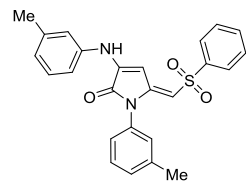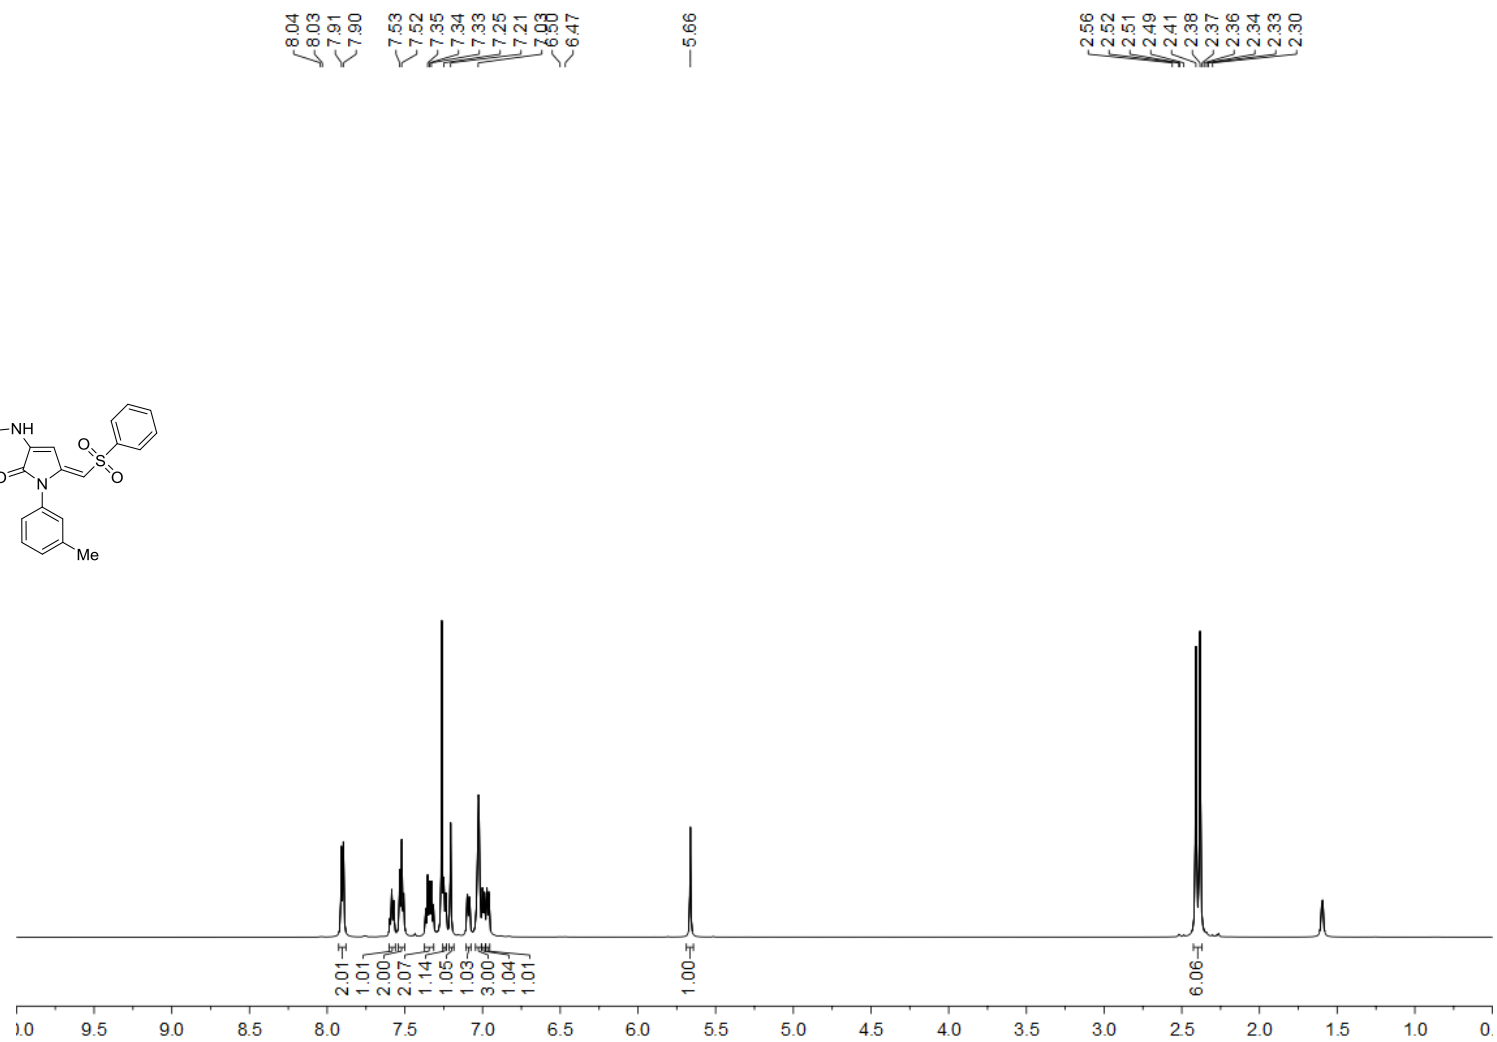

Figure S8.  $^1\text{H}$  NMR (600 MHz,  $\text{CDCl}_3$ ) spectra of compound **4b**

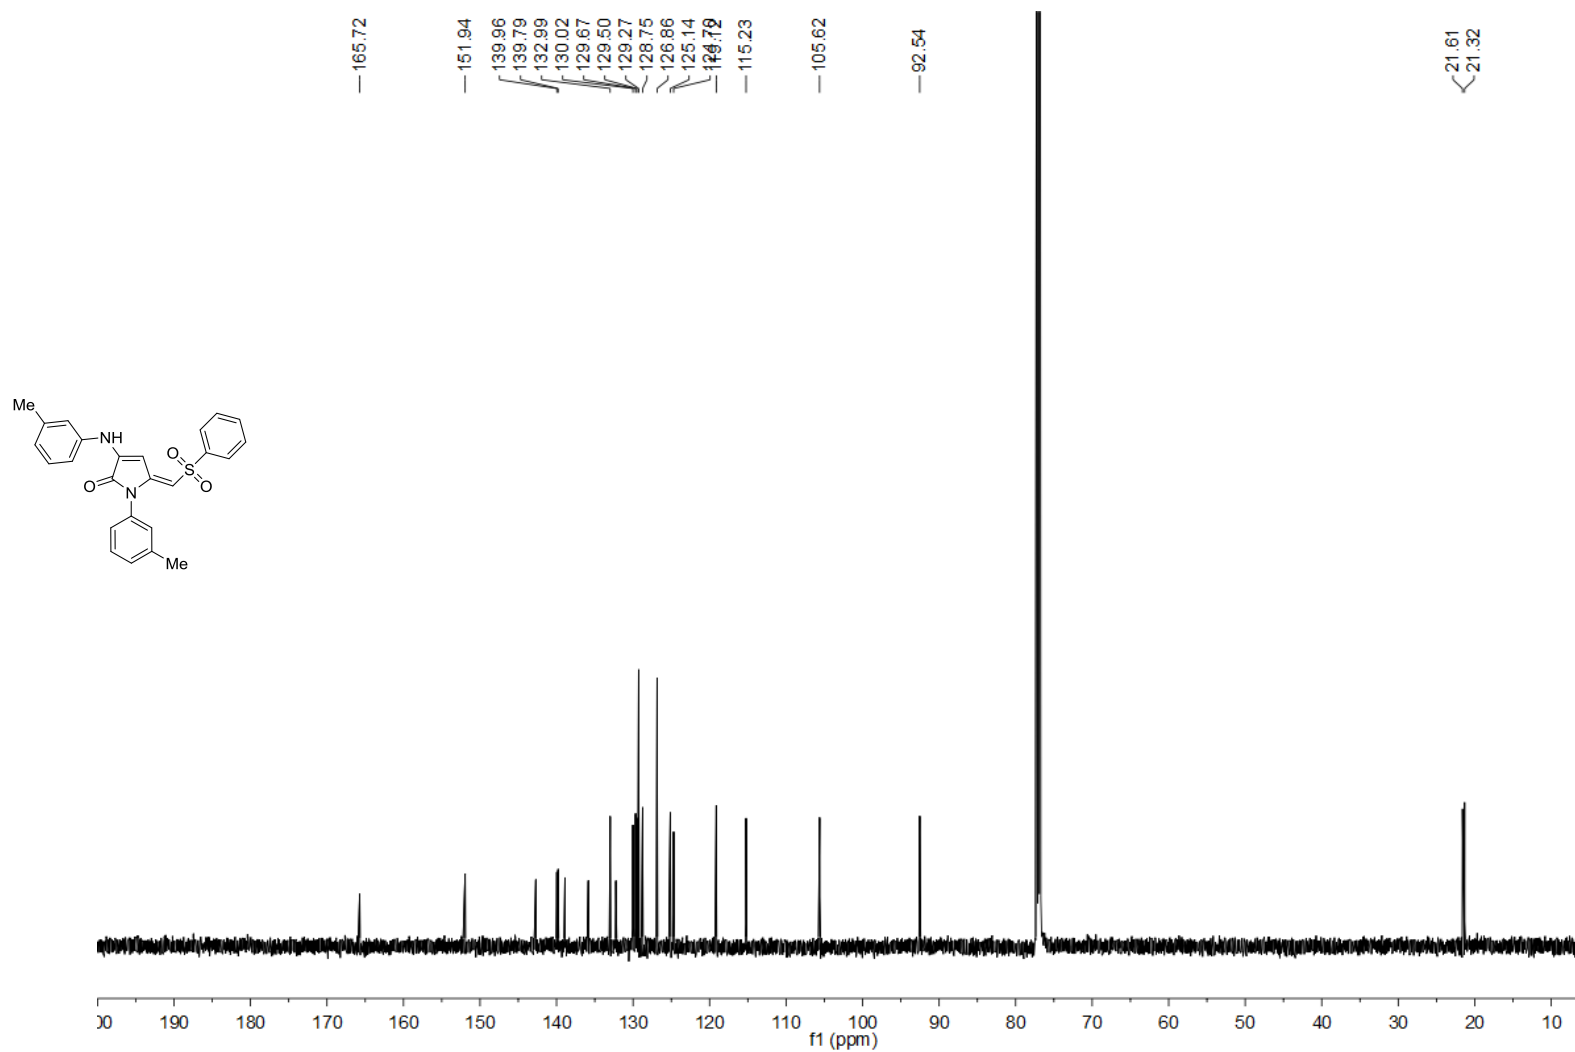

Figure S9. <sup>13</sup>C NMR (150 MHz, CDCl<sub>3</sub>) spectra of compound **4b**

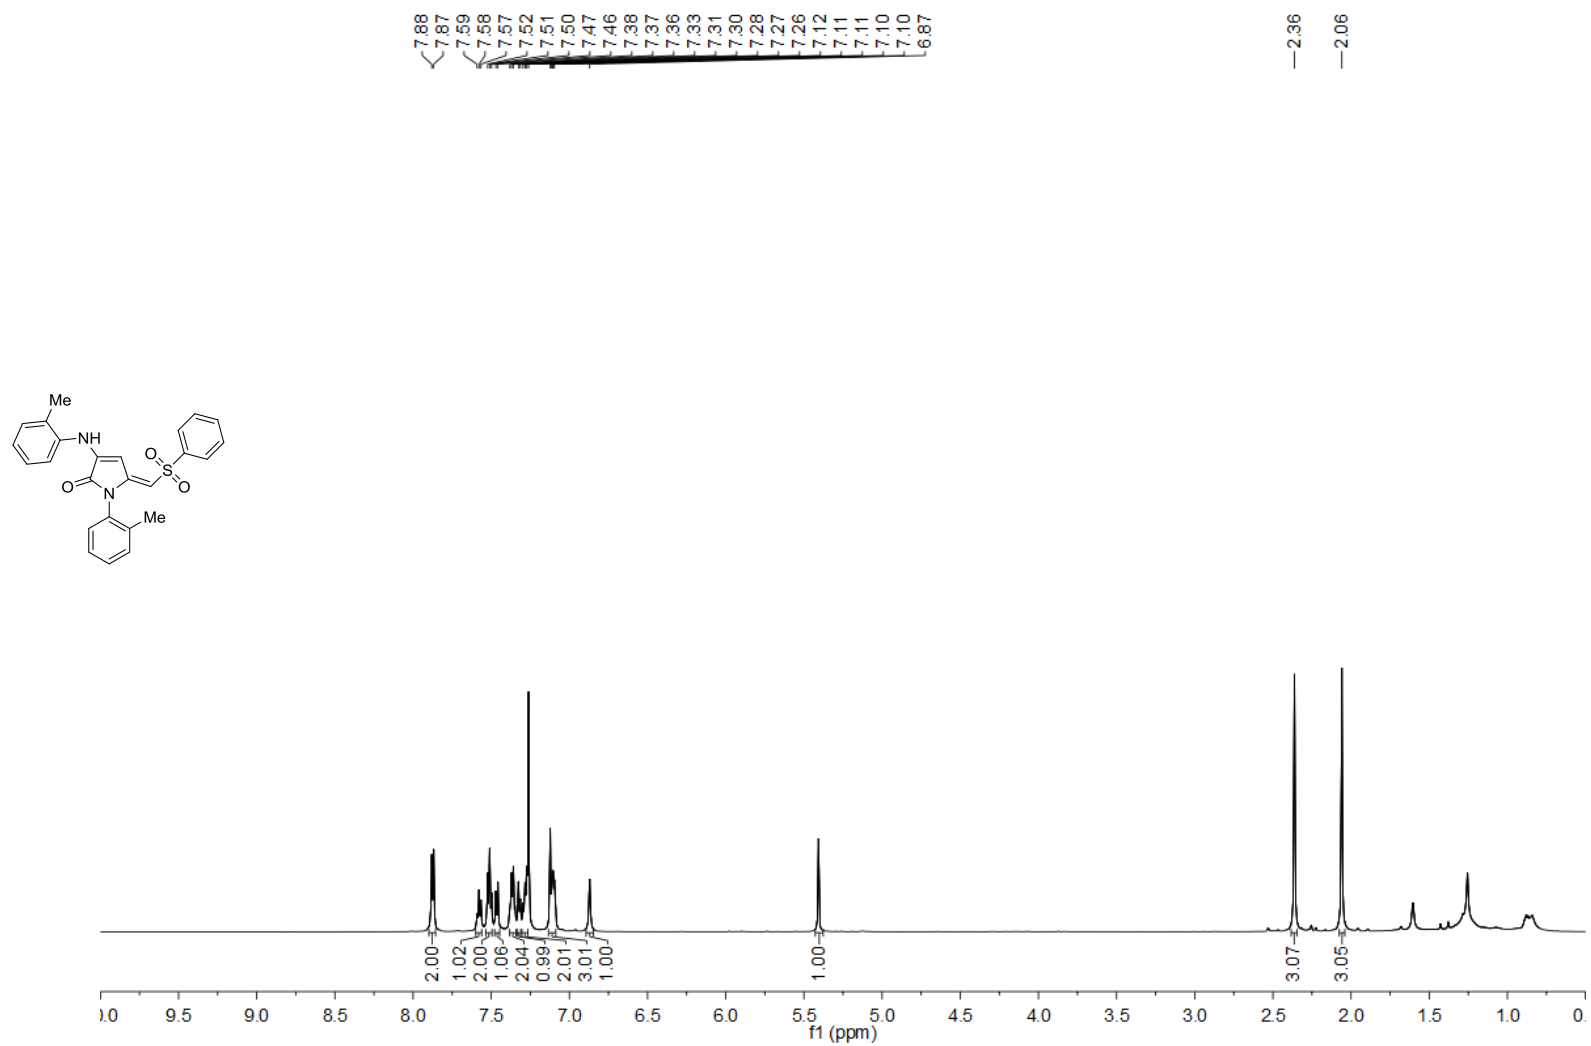

Figure S10. <sup>1</sup>H NMR (600 MHz, CDCl<sub>3</sub>) spectra of compound 4c

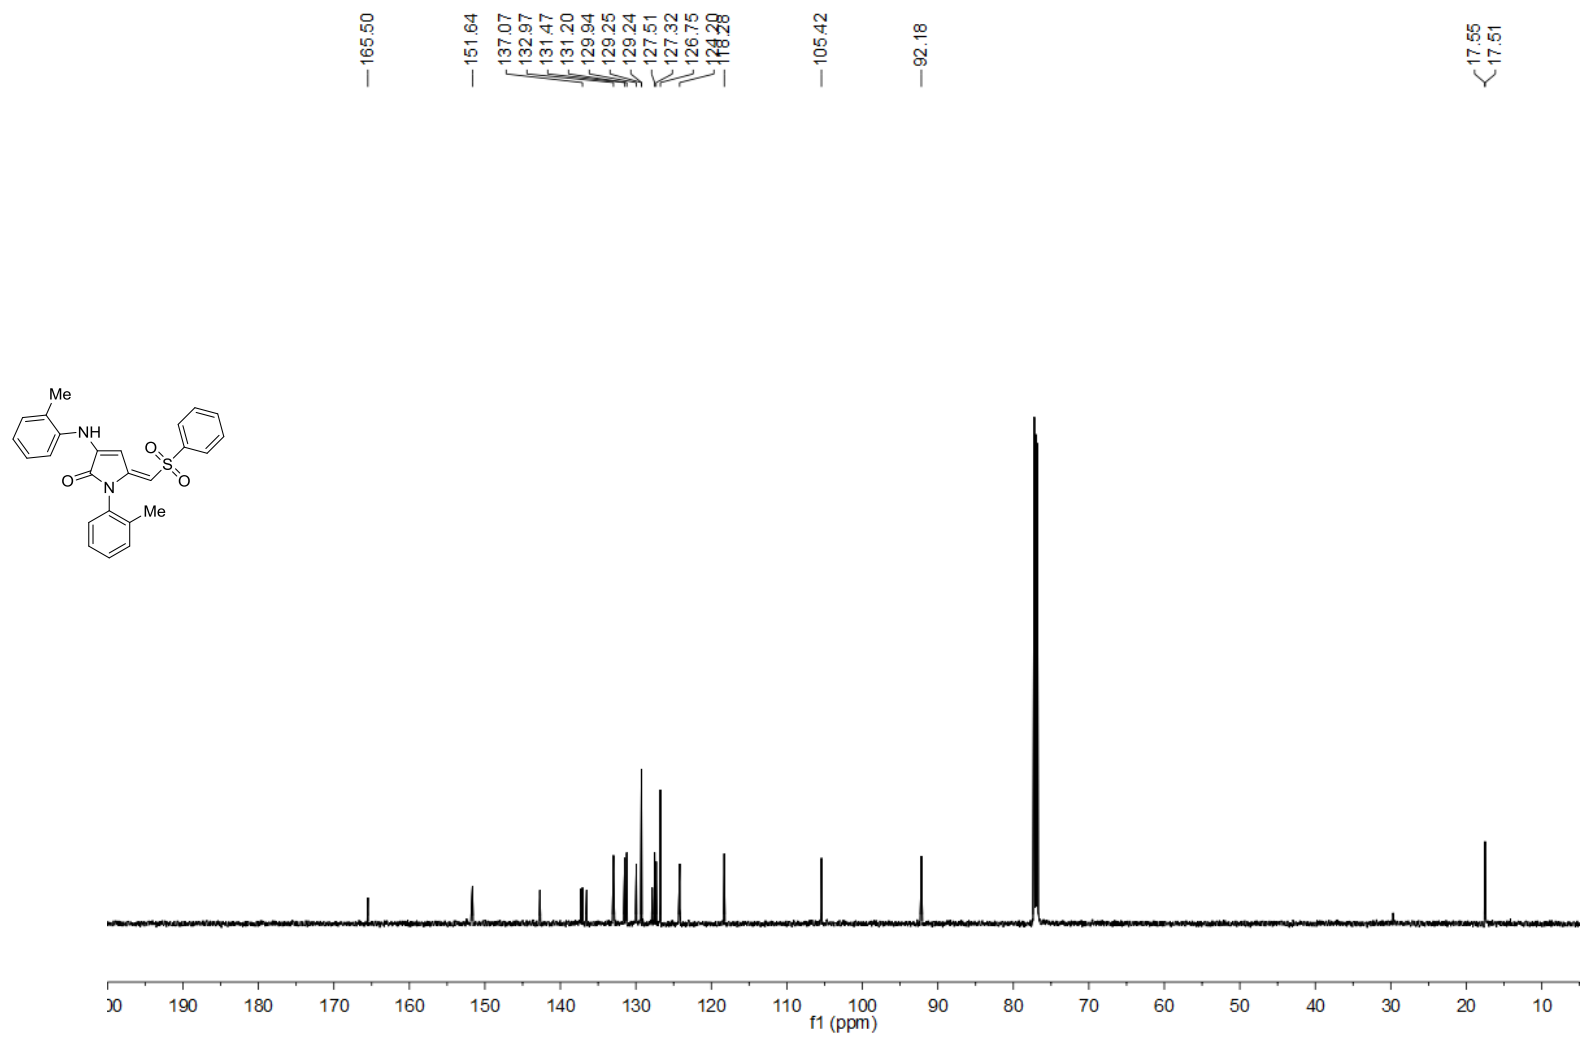

**Figure S11.** <sup>13</sup>C NMR (150 MHz, CDCl<sub>3</sub>) spectra of compound **4c**

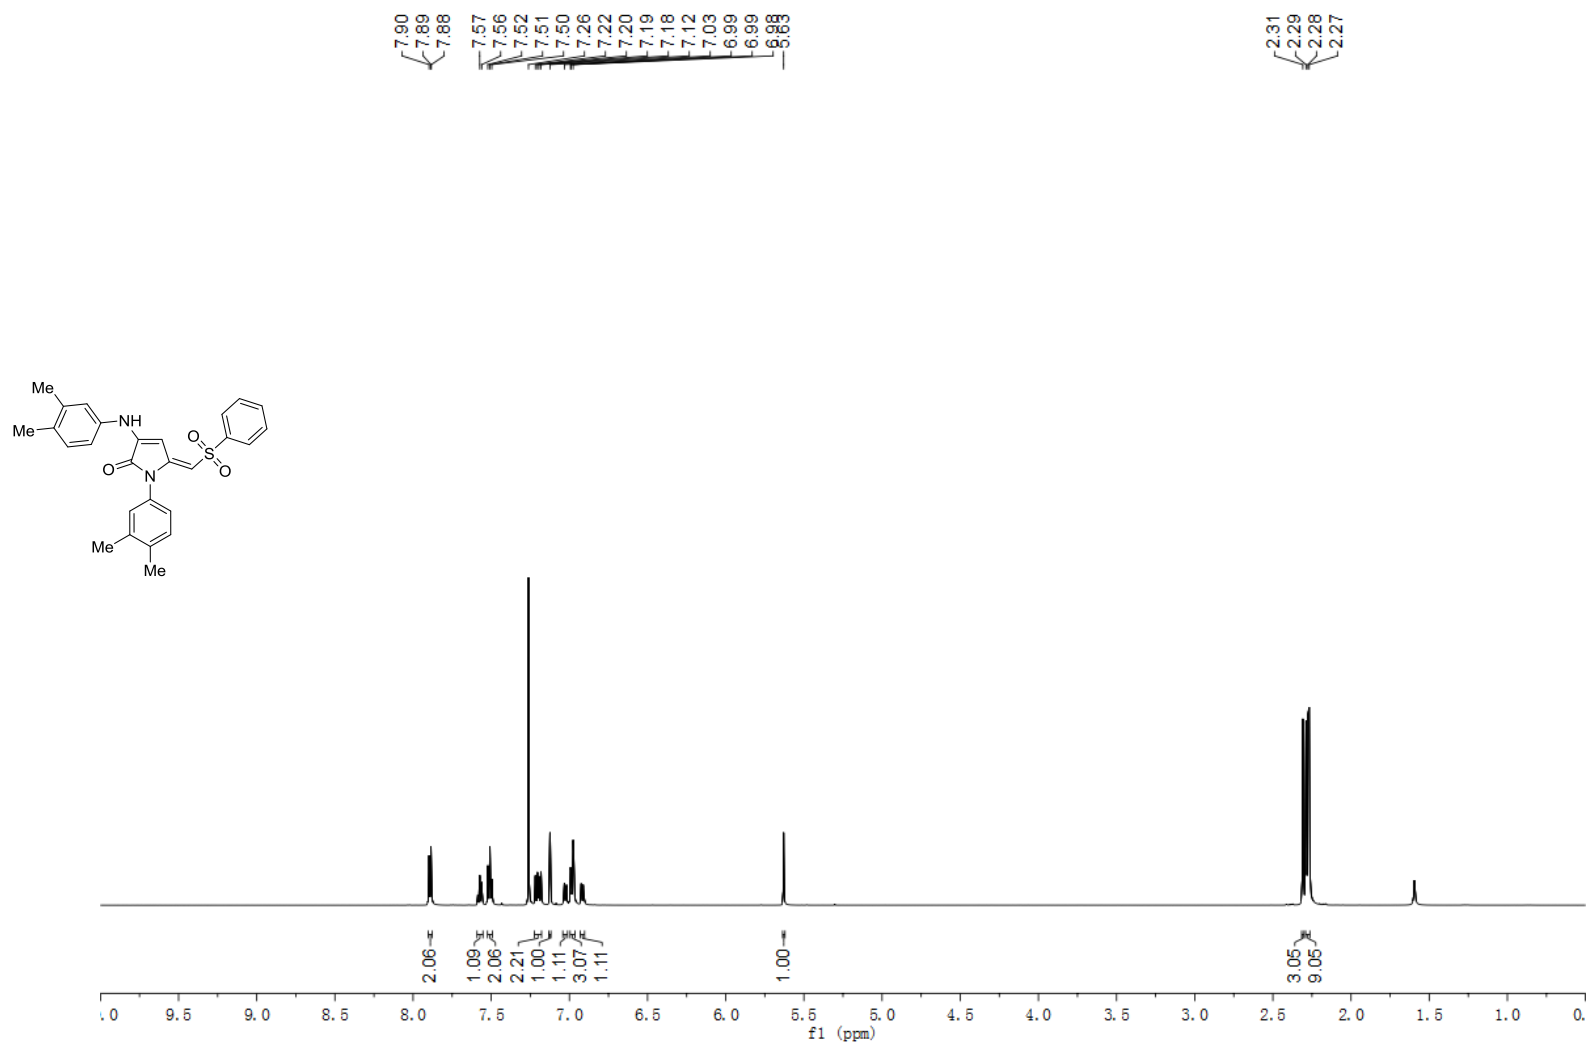

**Figure S12.**  $^1\text{H NMR}$  (600 MHz,  $\text{CDCl}_3$ ) spectra of compound **4d**



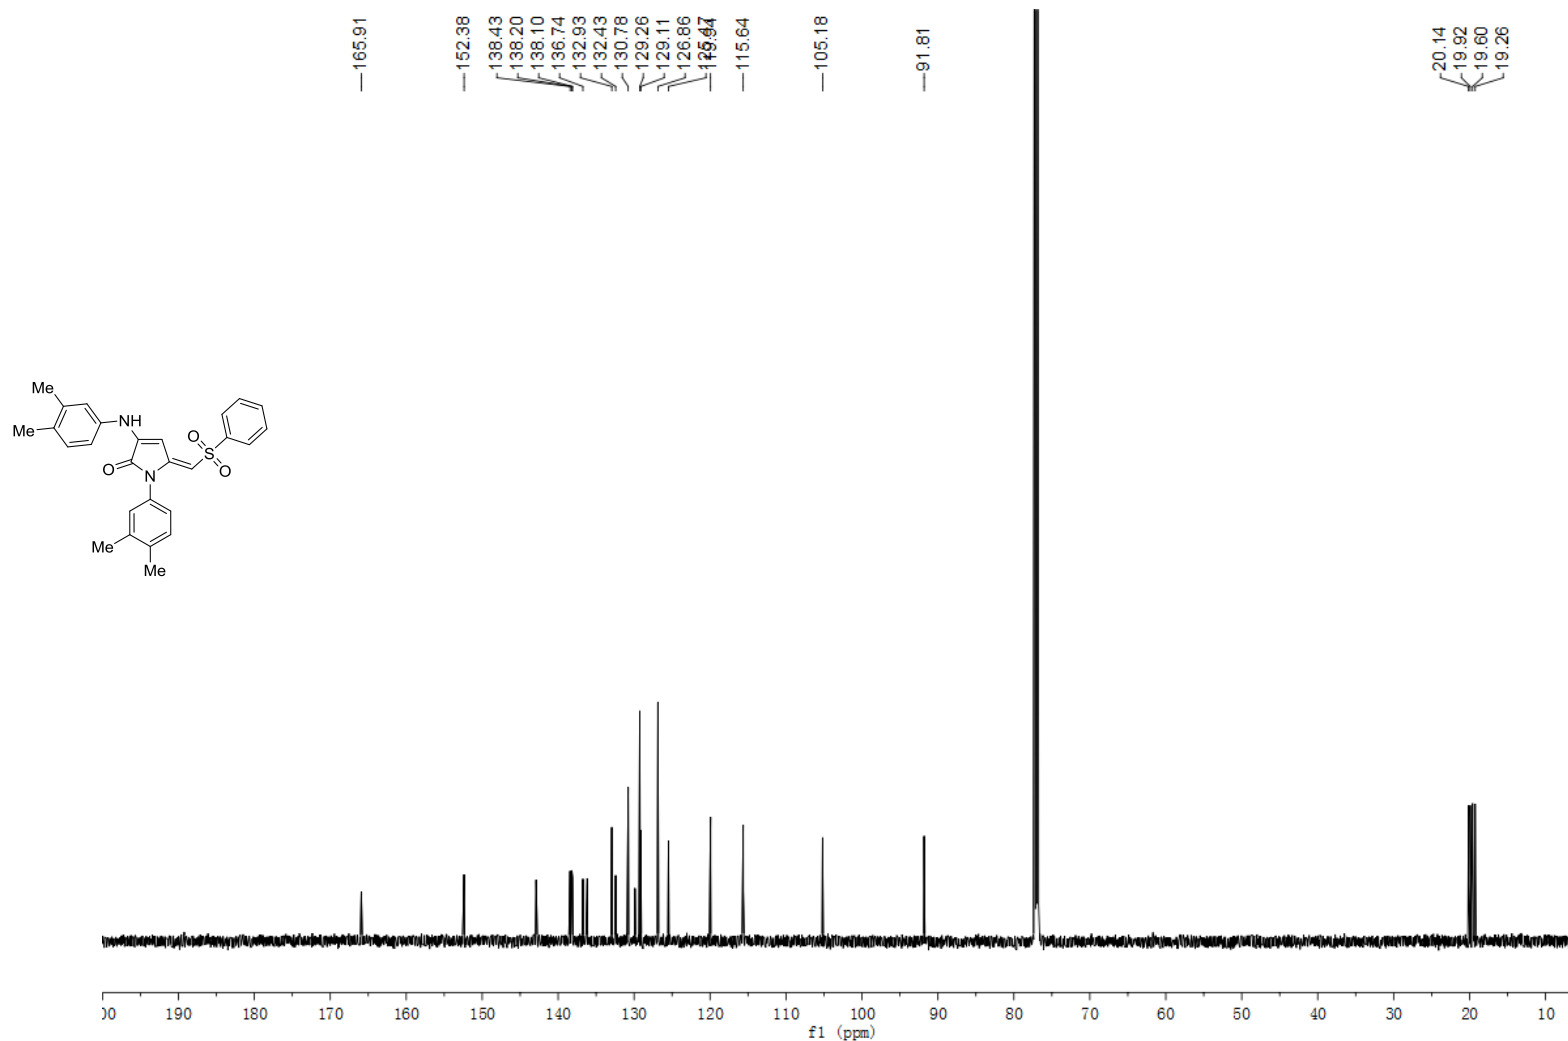

Figure S13. <sup>13</sup>C NMR (150 MHz, CDCl<sub>3</sub>) spectra of compound **4d**

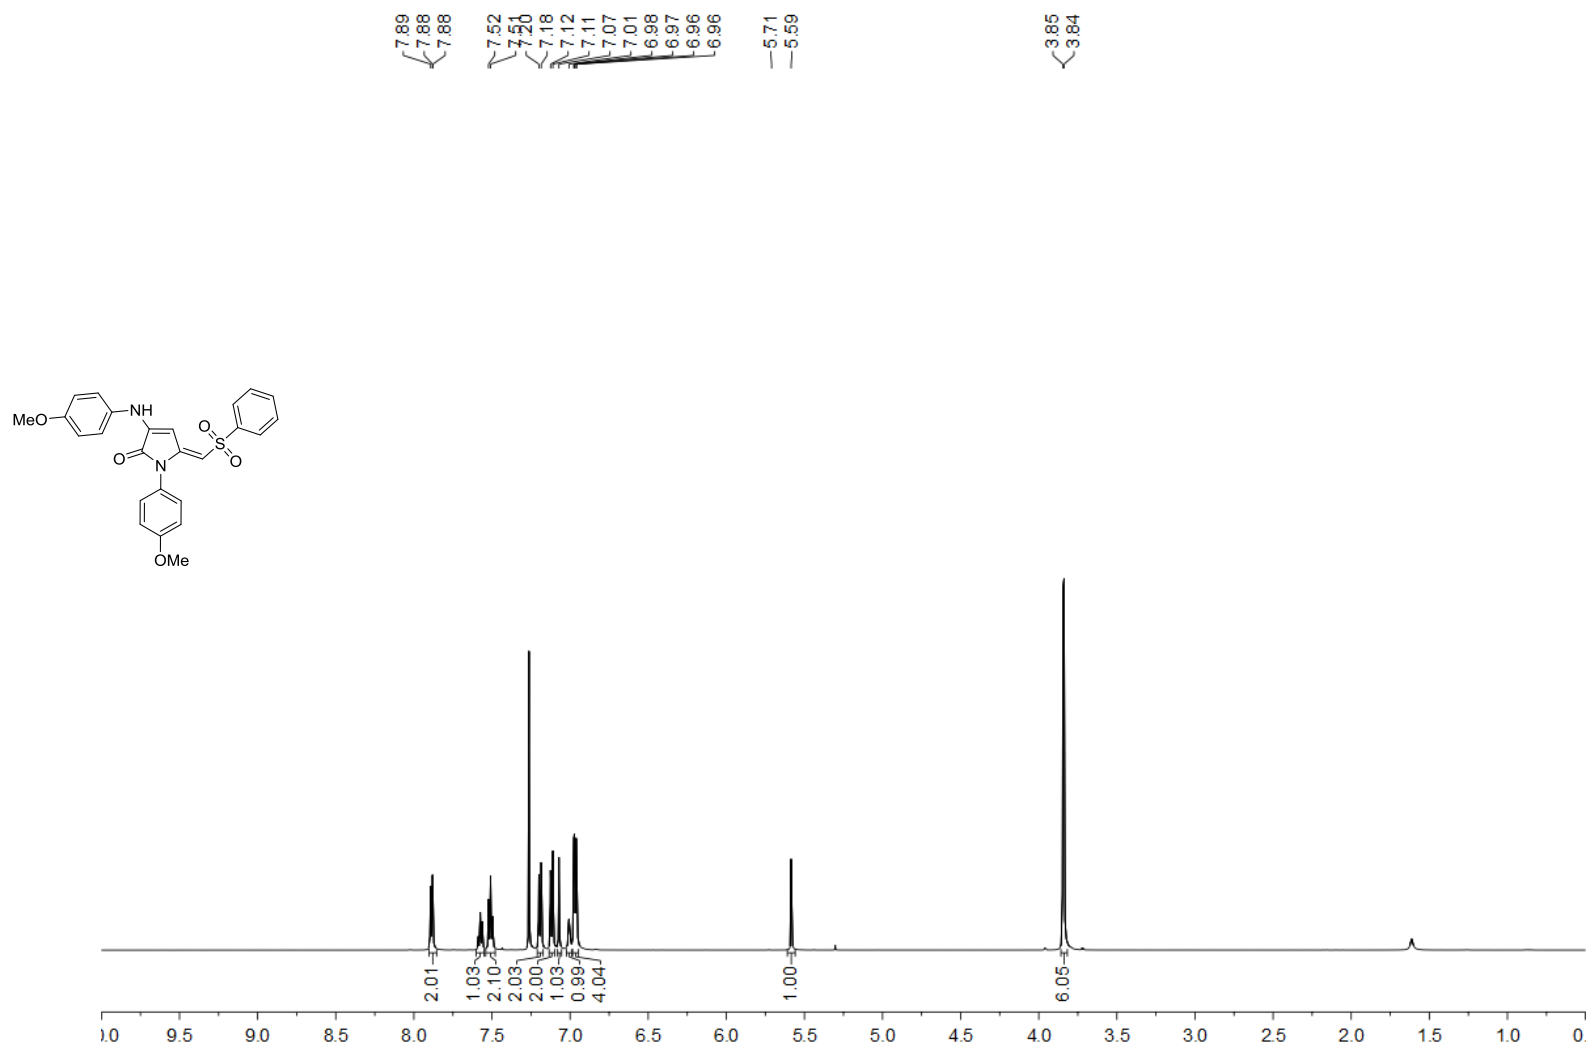

Figure S14. <sup>1</sup>H NMR (600 MHz, CDCl<sub>3</sub>) spectra of compound **4e**

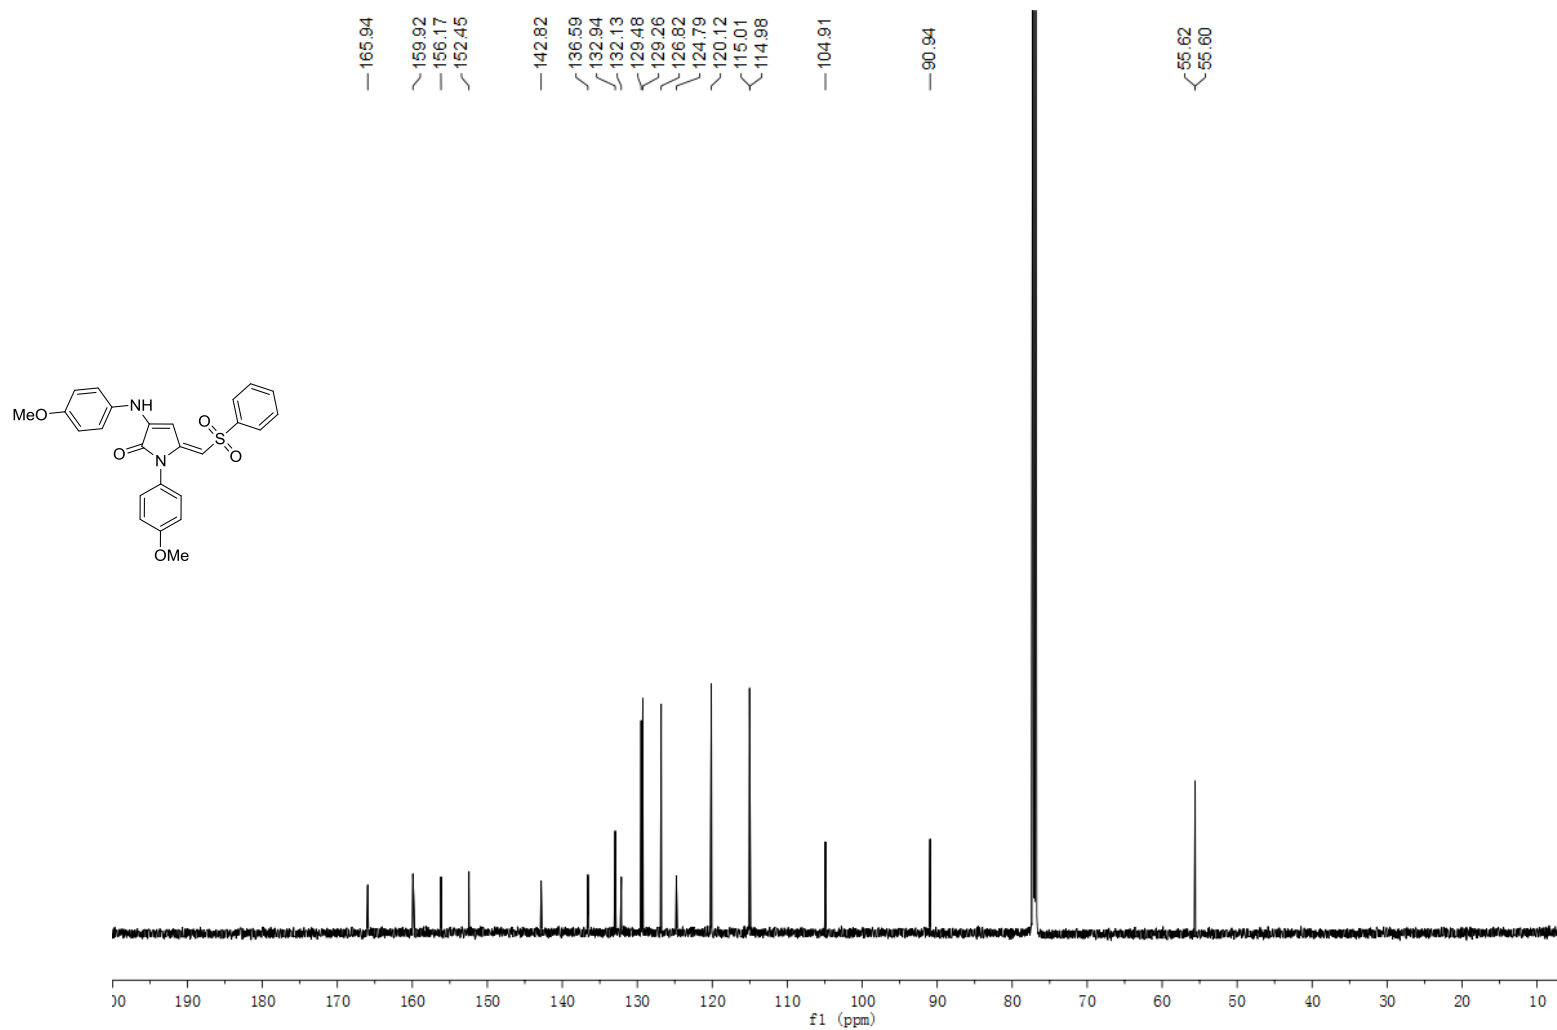

Figure S15. <sup>13</sup>C NMR (150 MHz, CDCl<sub>3</sub>) spectra of compound 4e

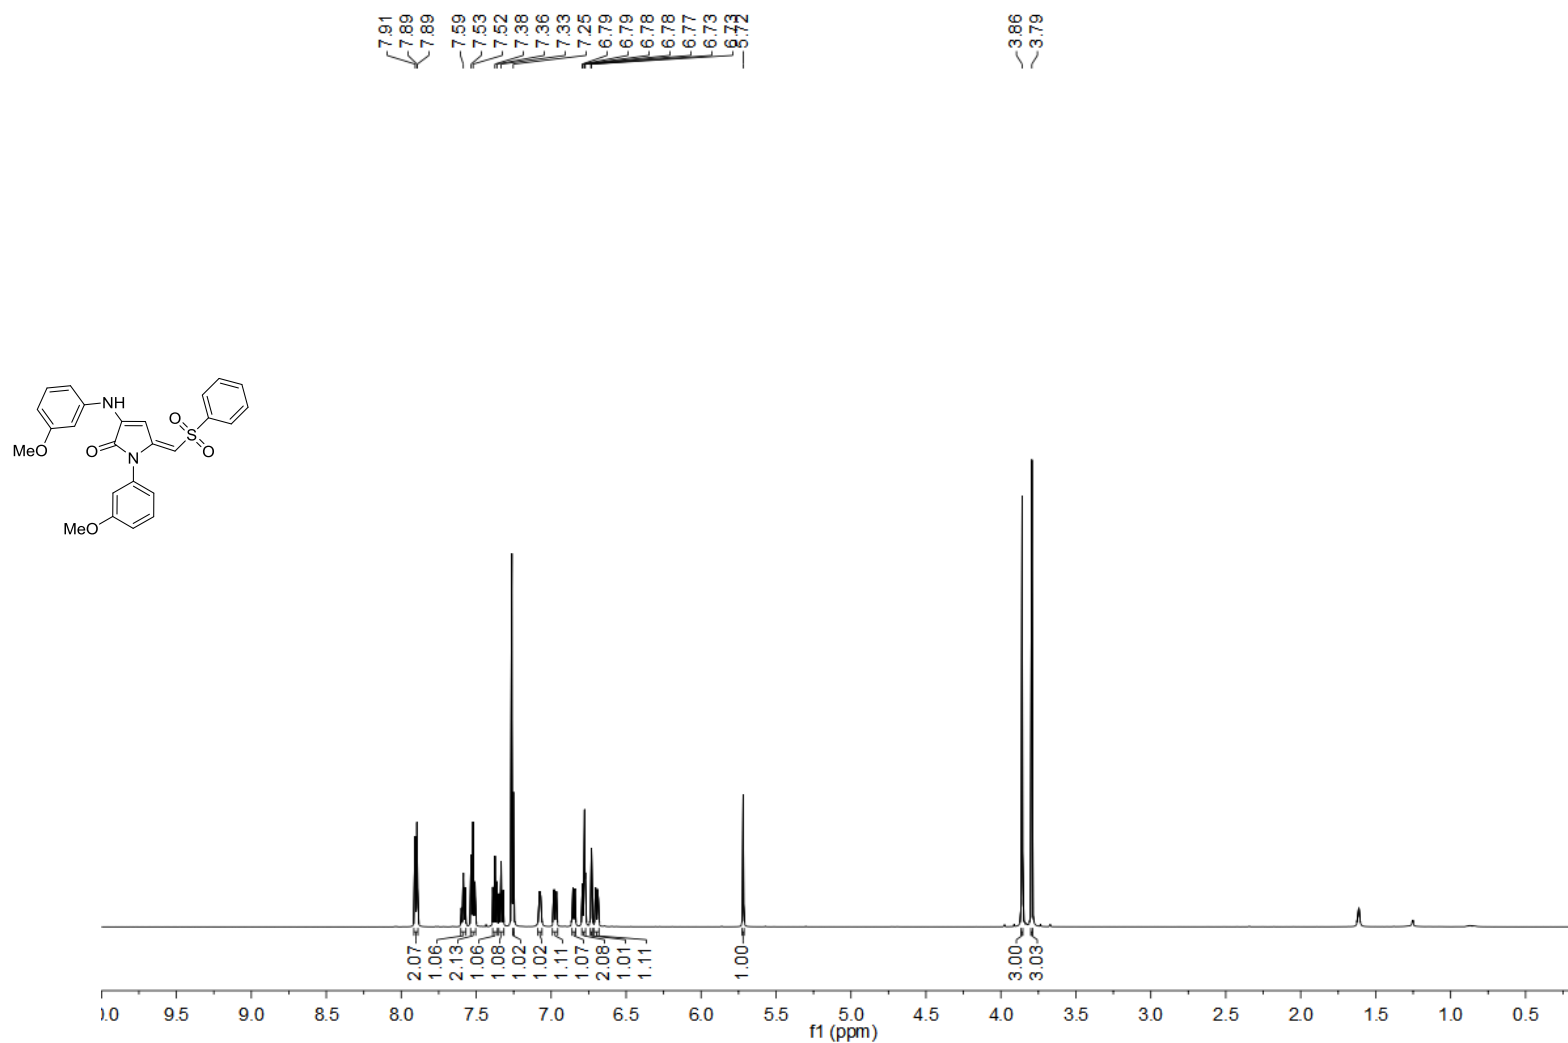

Figure S16. <sup>1</sup>H NMR (600 MHz, CDCl<sub>3</sub>) spectra of compound **4f**

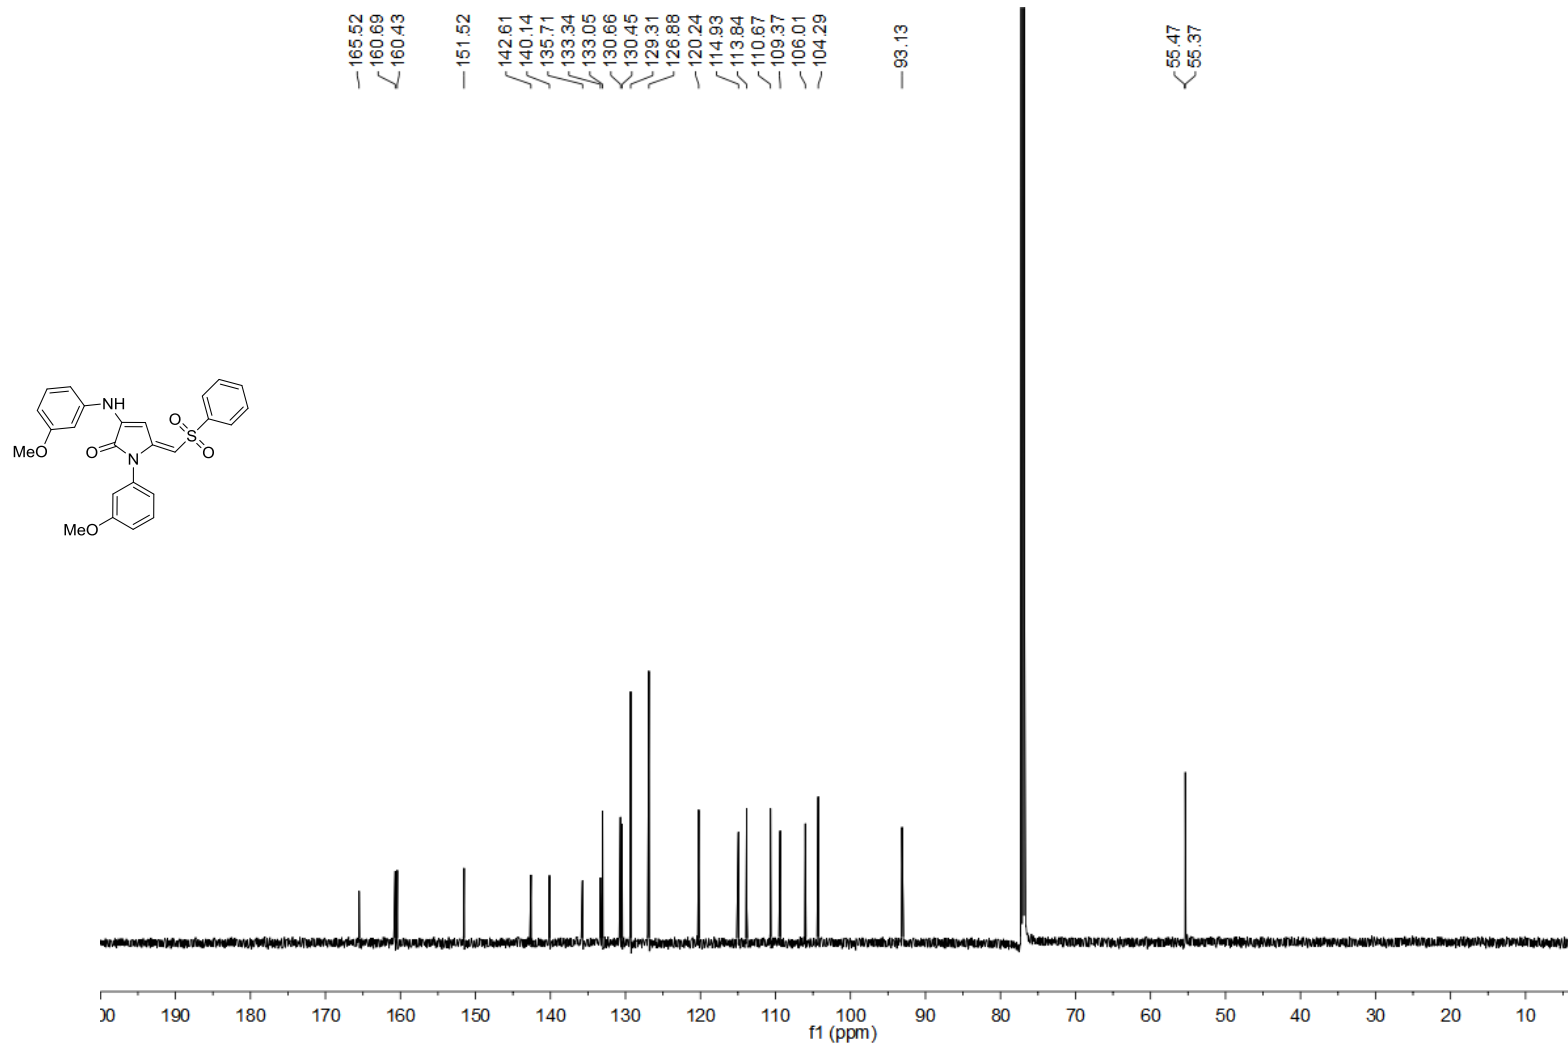

Figure S17. <sup>13</sup>C NMR (150 MHz, CDCl<sub>3</sub>) spectra of compound 4f

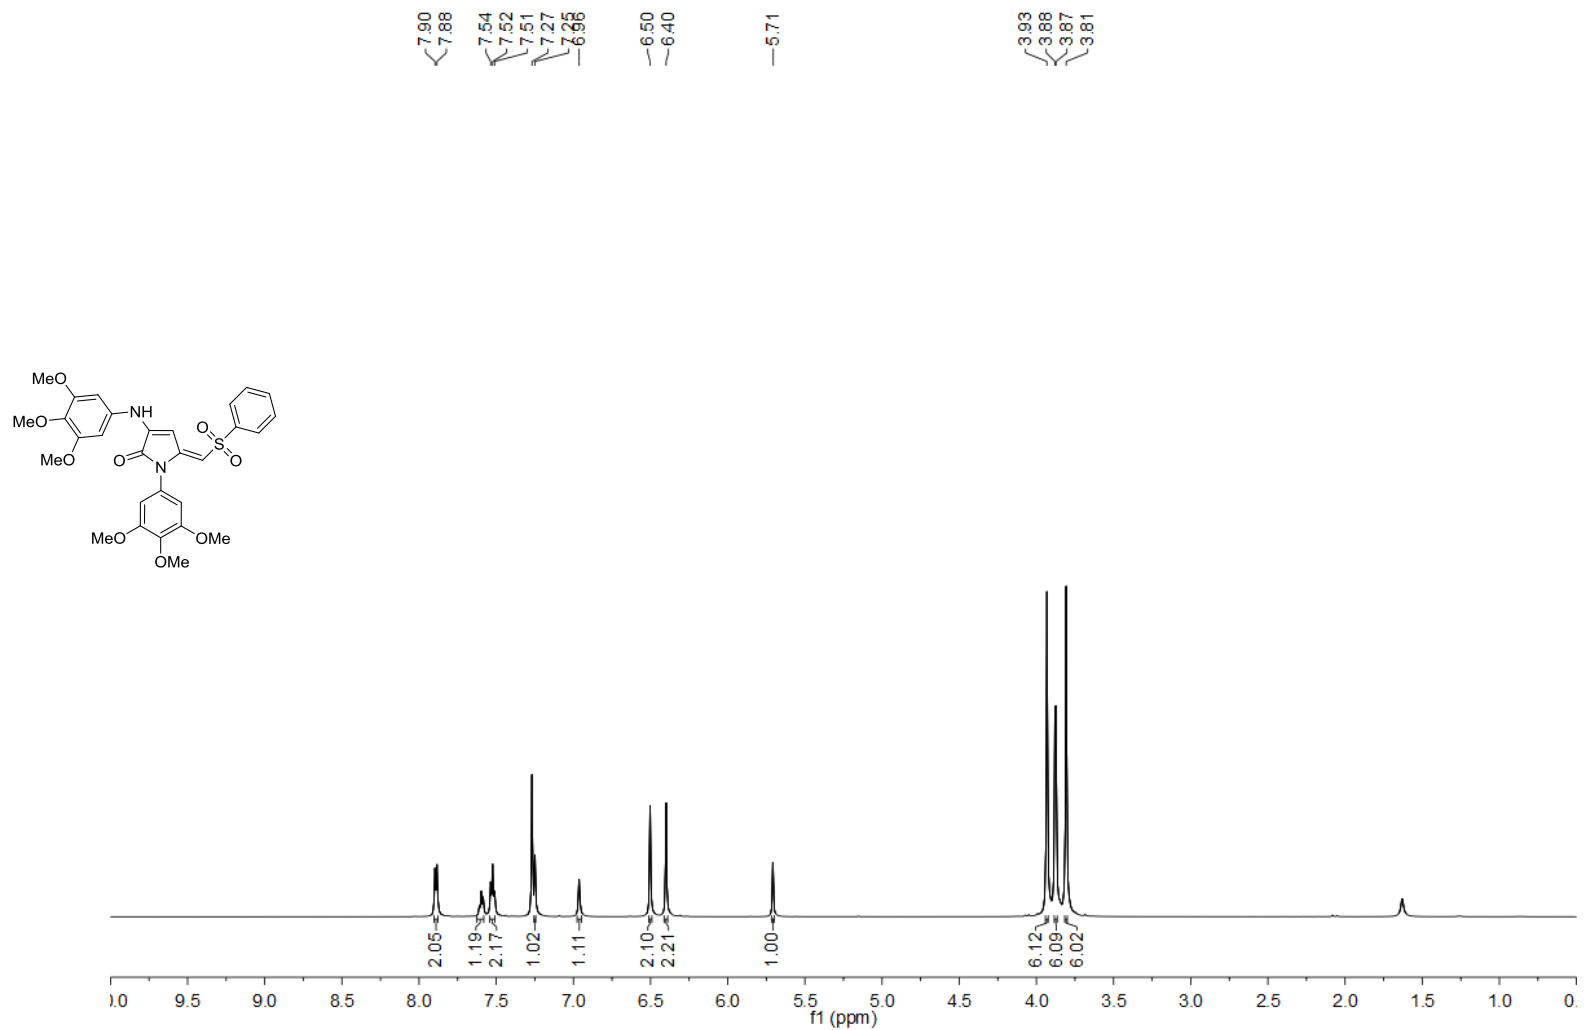

**Figure S18.** <sup>1</sup>H NMR (600 MHz, CDCl<sub>3</sub>) spectra of compound **4g**

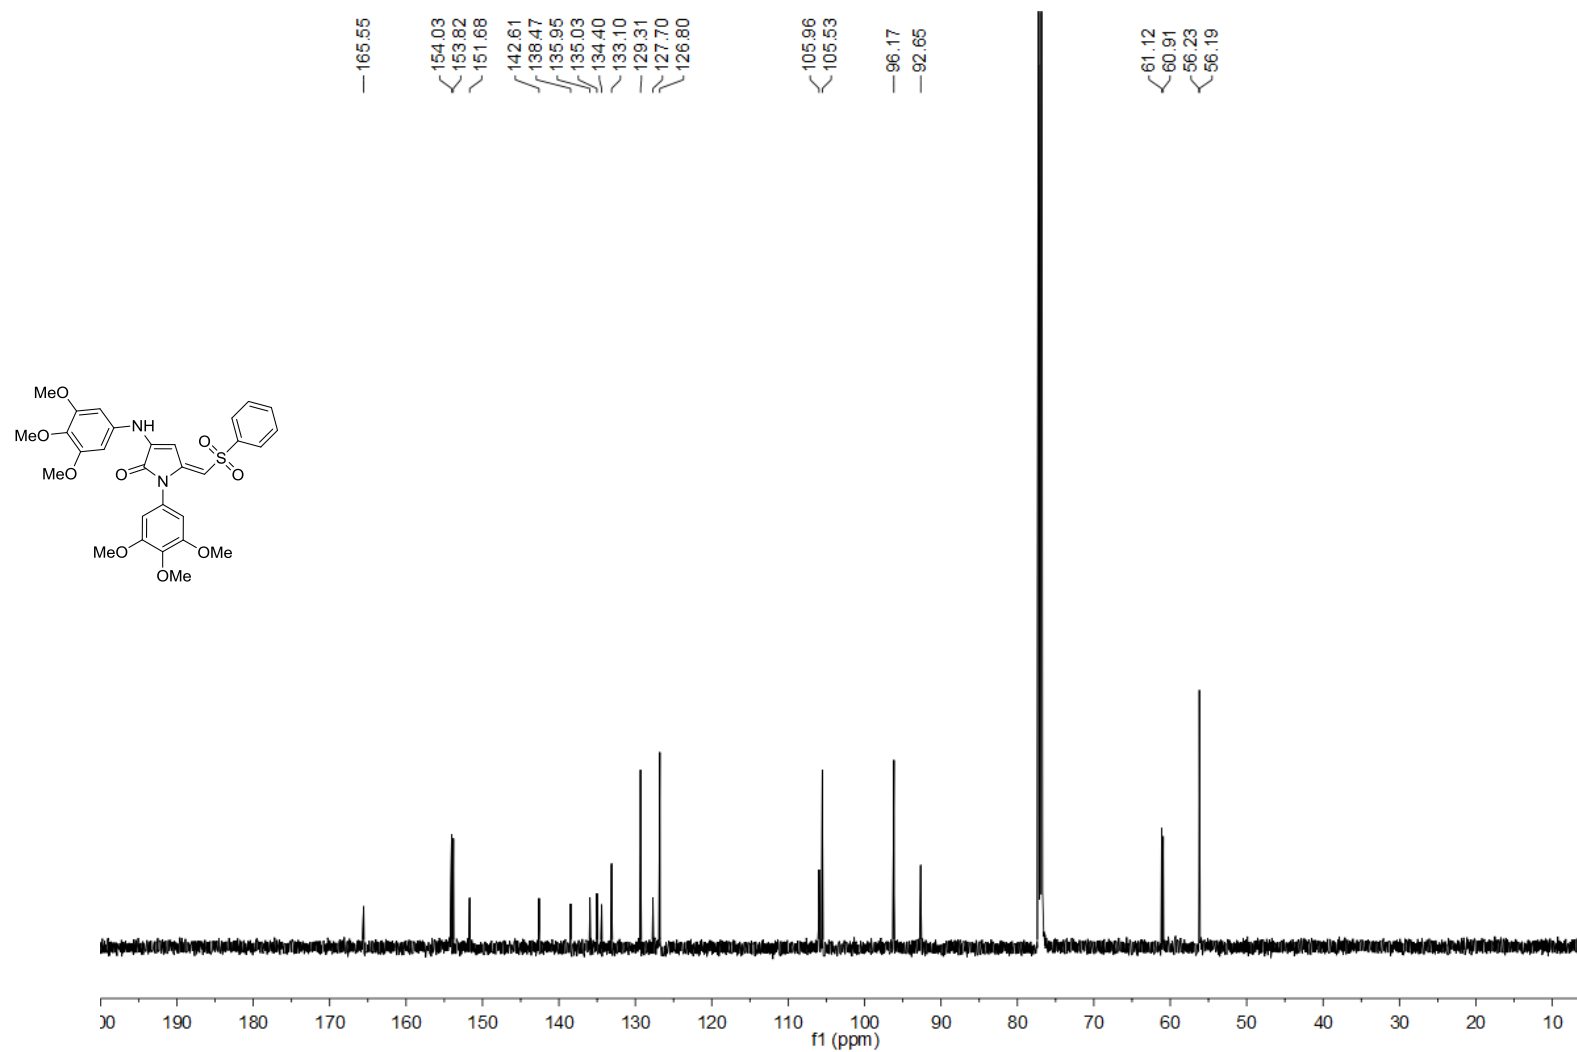

Figure S19. <sup>13</sup>C NMR (150 MHz, CDCl<sub>3</sub>) spectra of compound 4g

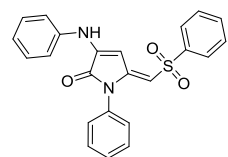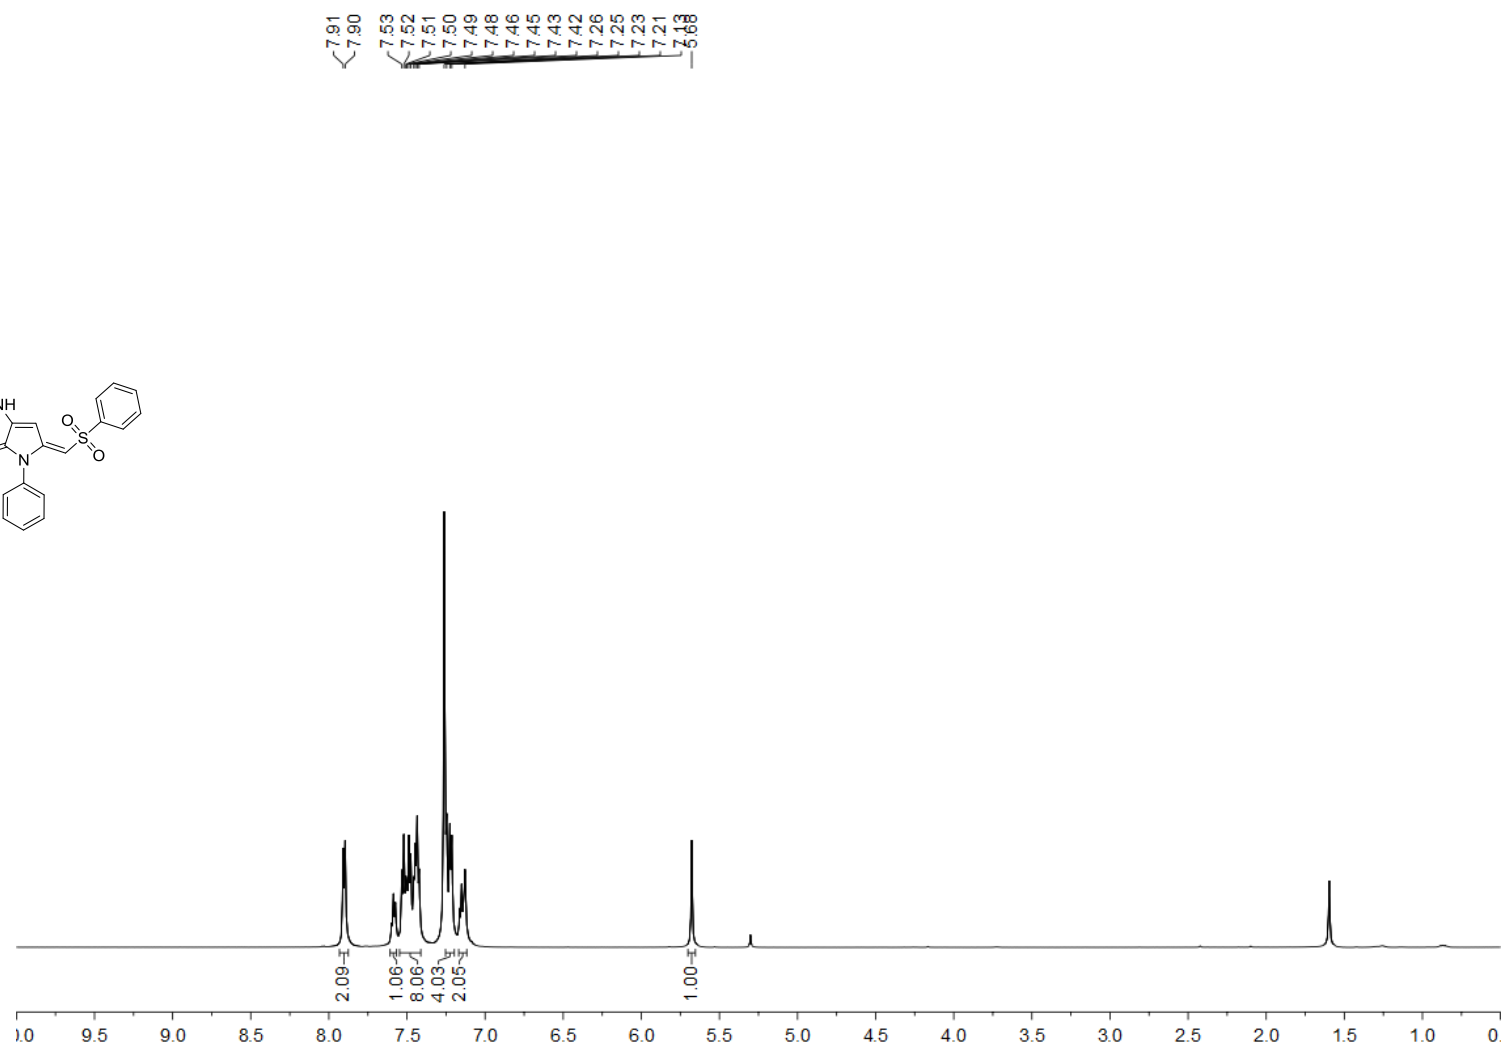

Figure S20.  $^1\text{H}$  NMR (600 MHz,  $\text{CDCl}_3$ ) spectra of compound **4h**



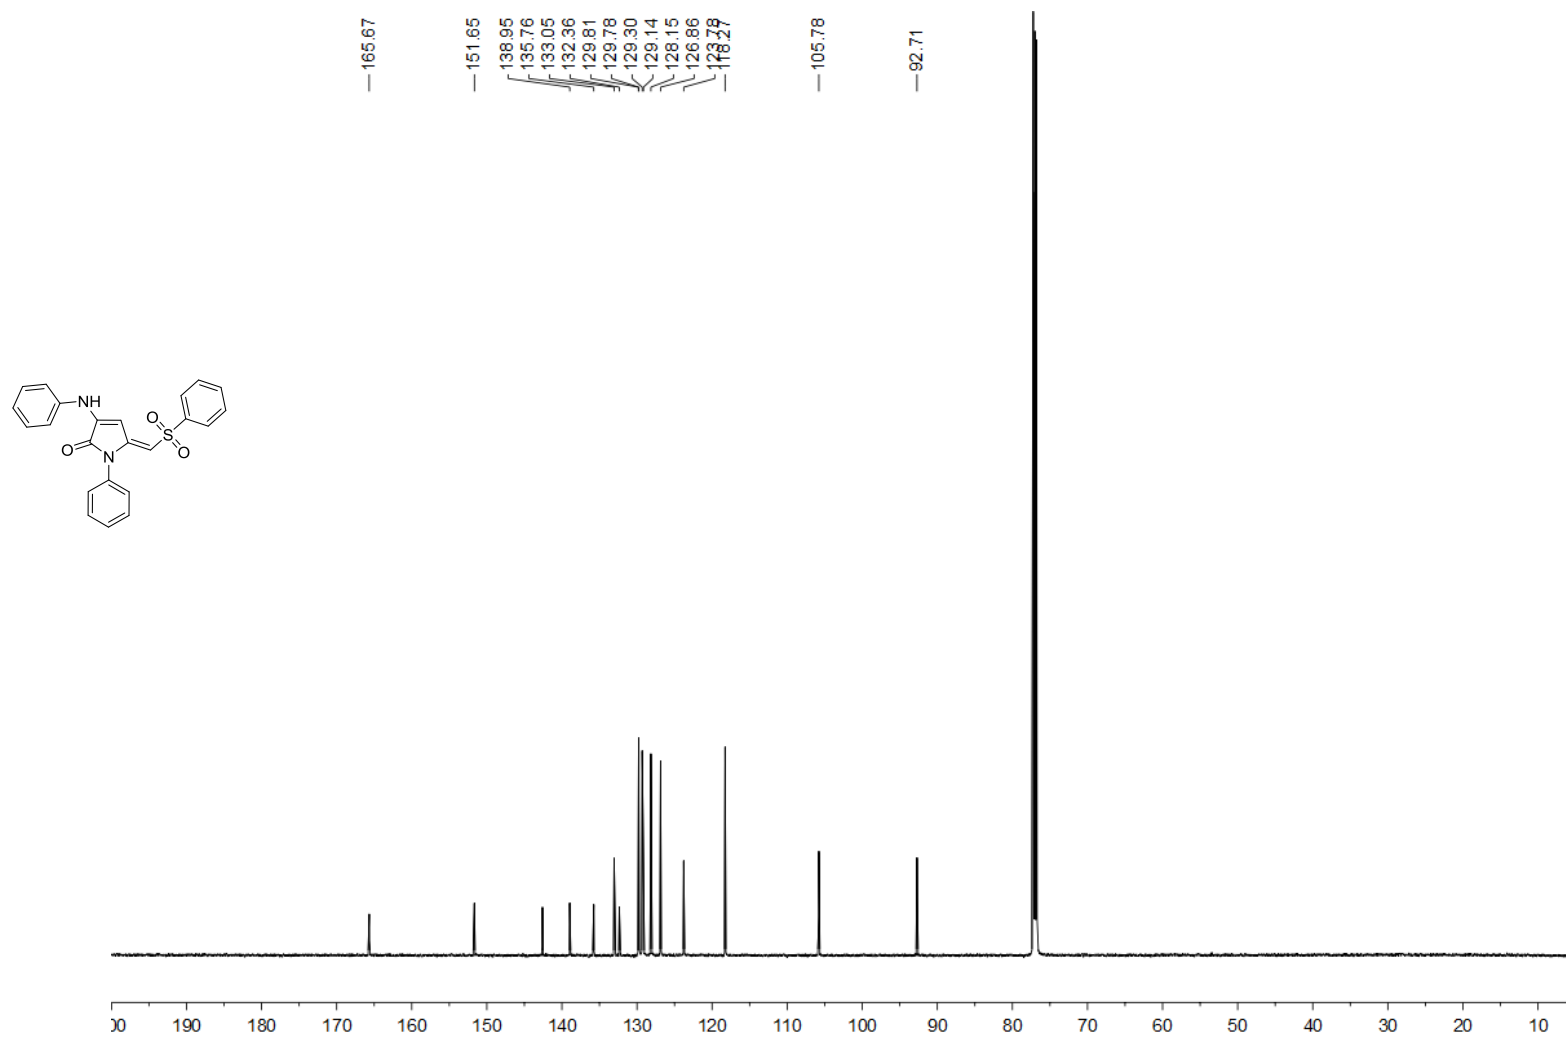

**Figure S21.** <sup>13</sup>C NMR (150 MHz, CDCl<sub>3</sub>) spectra of compound **4h**

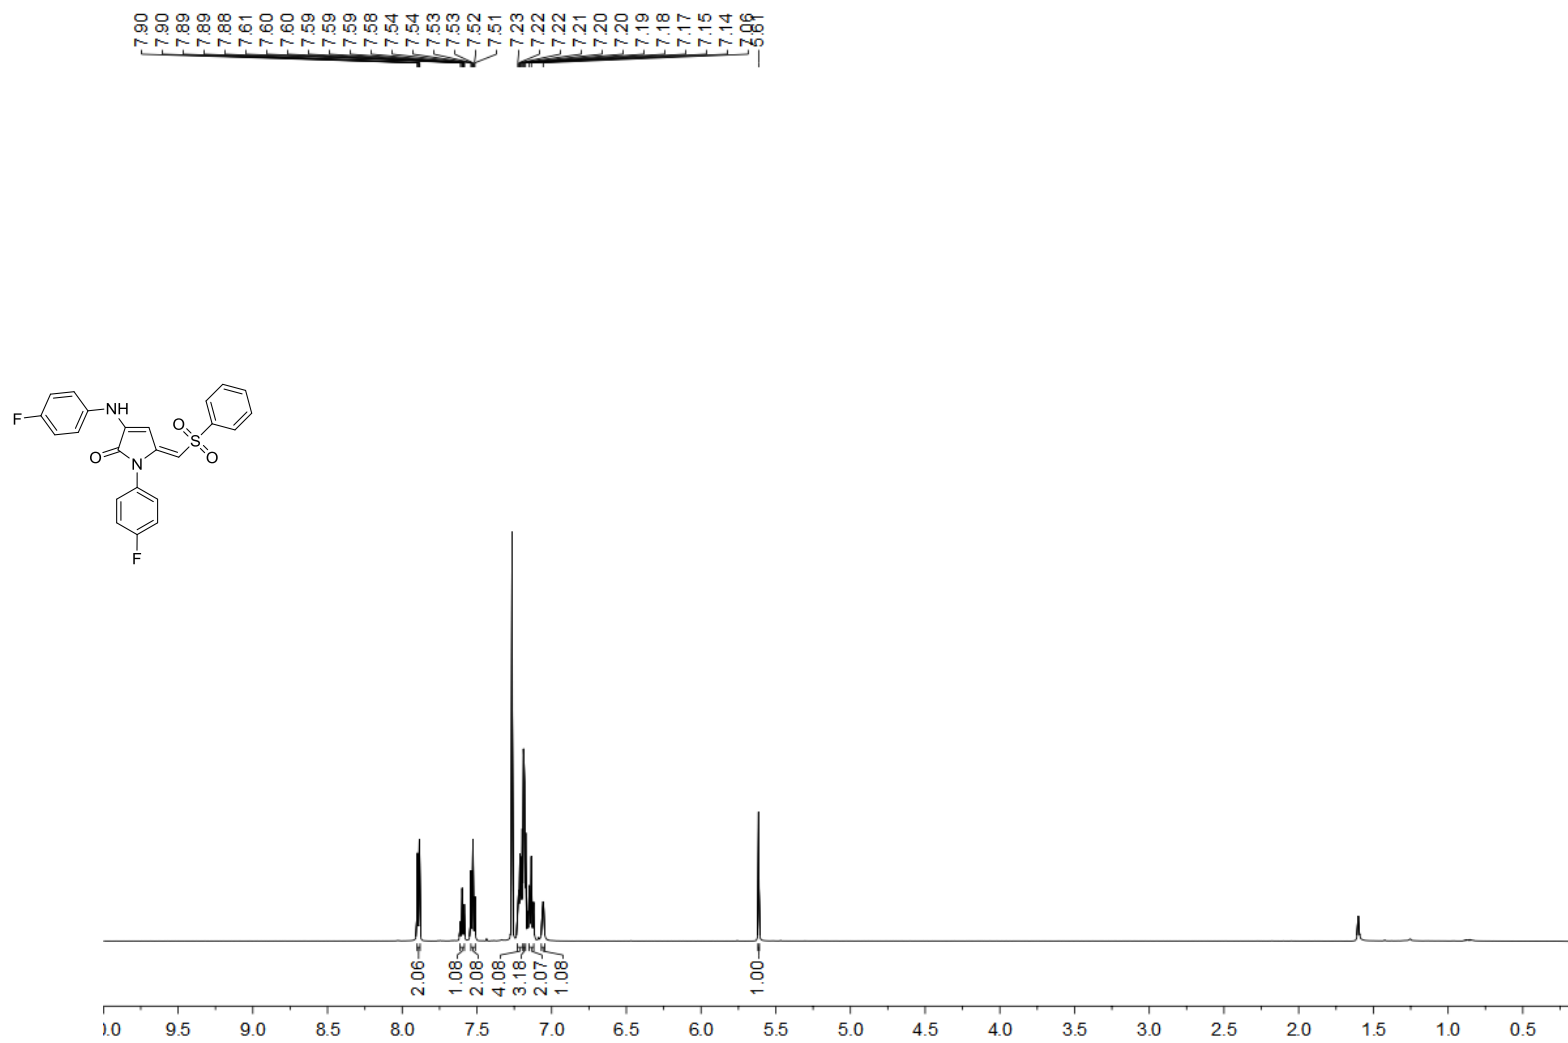

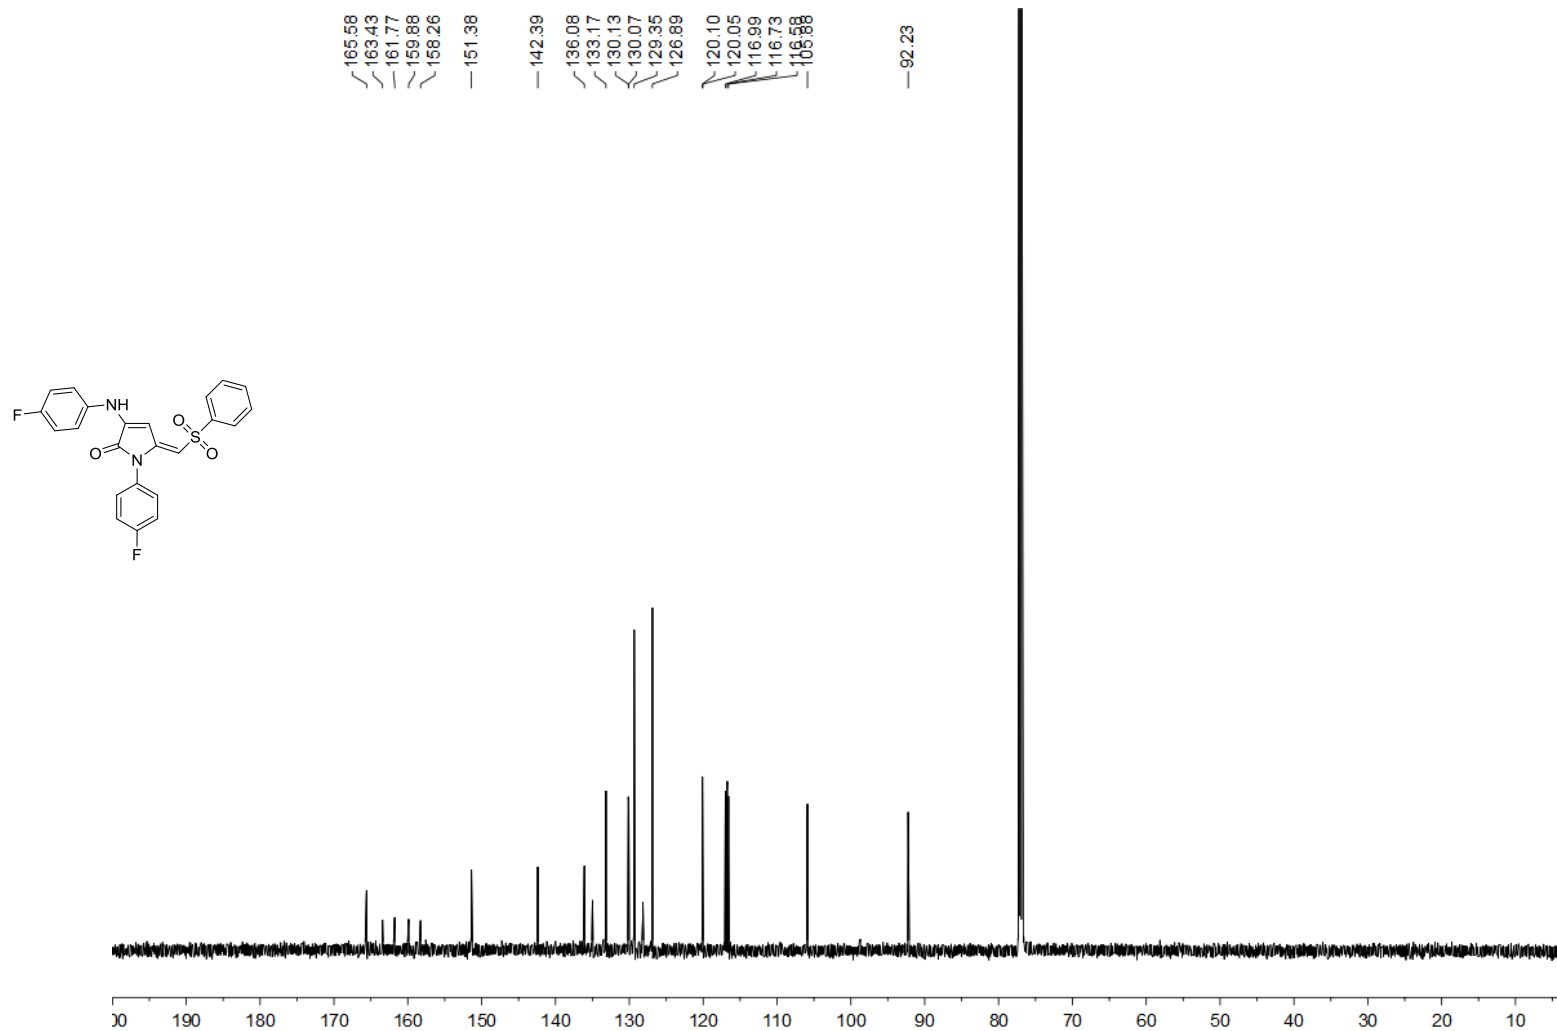

Figure S23. <sup>13</sup>C NMR (150 MHz, CDCl<sub>3</sub>) spectra of compound **4i**

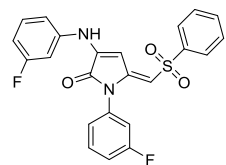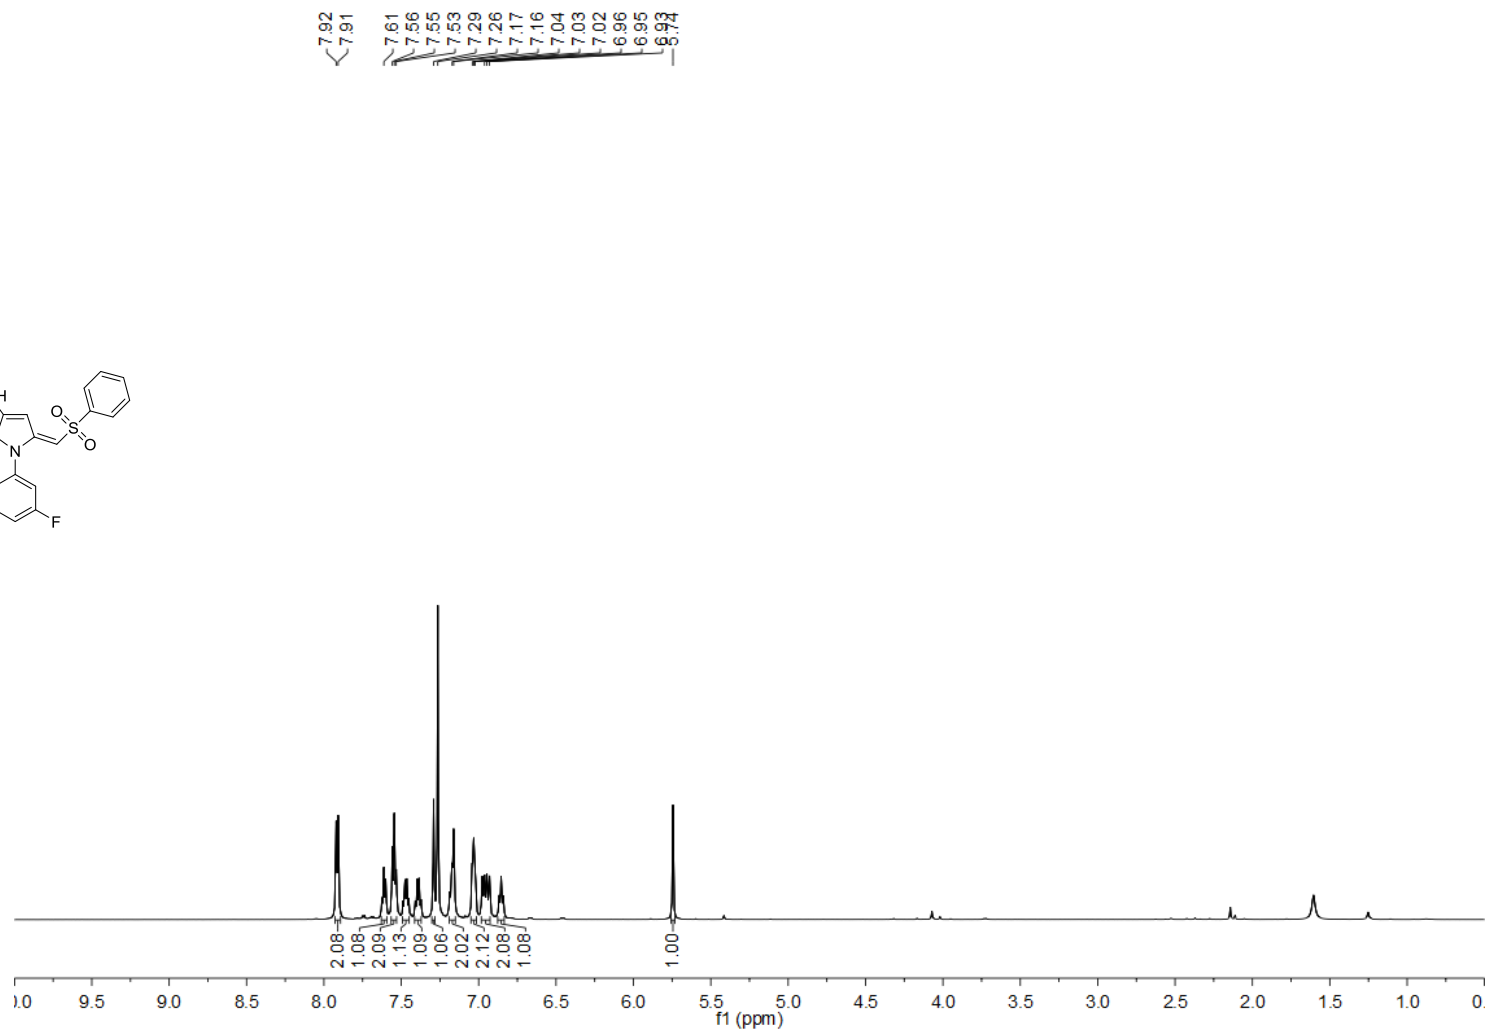

Figure S24.  $^1\text{H}$  NMR (600 MHz,  $\text{CDCl}_3$ ) spectra of compound **4j**

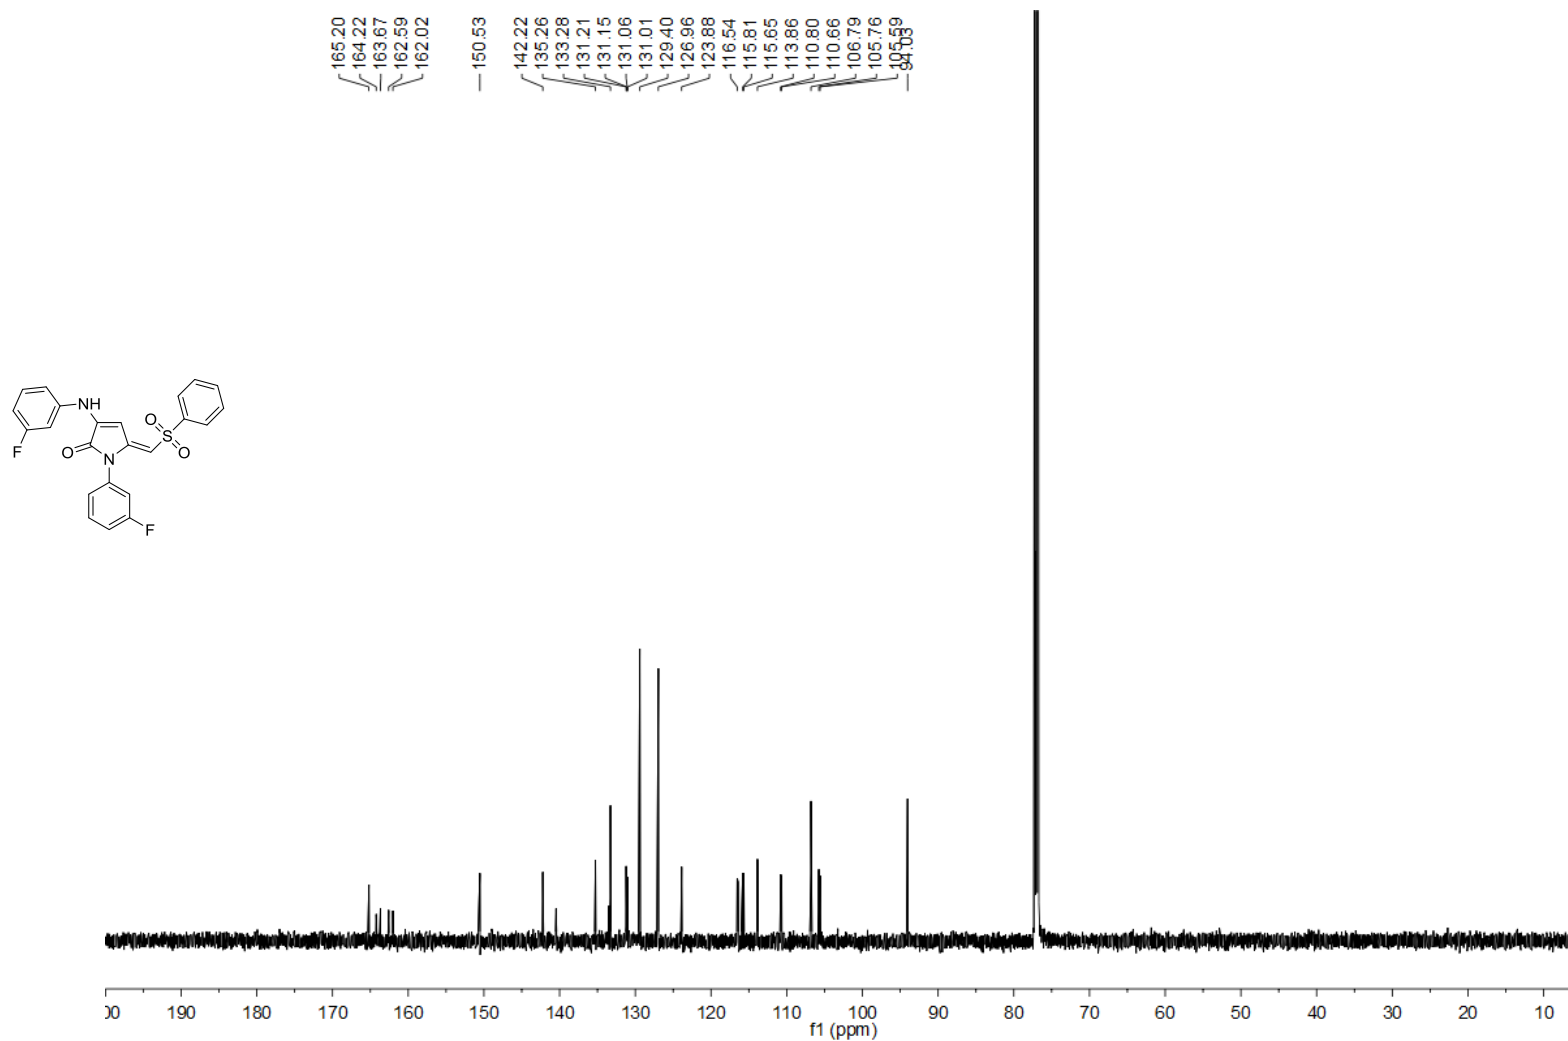

Figure S25. <sup>13</sup>C NMR (150 MHz, CDCl<sub>3</sub>) spectra of compound 4j

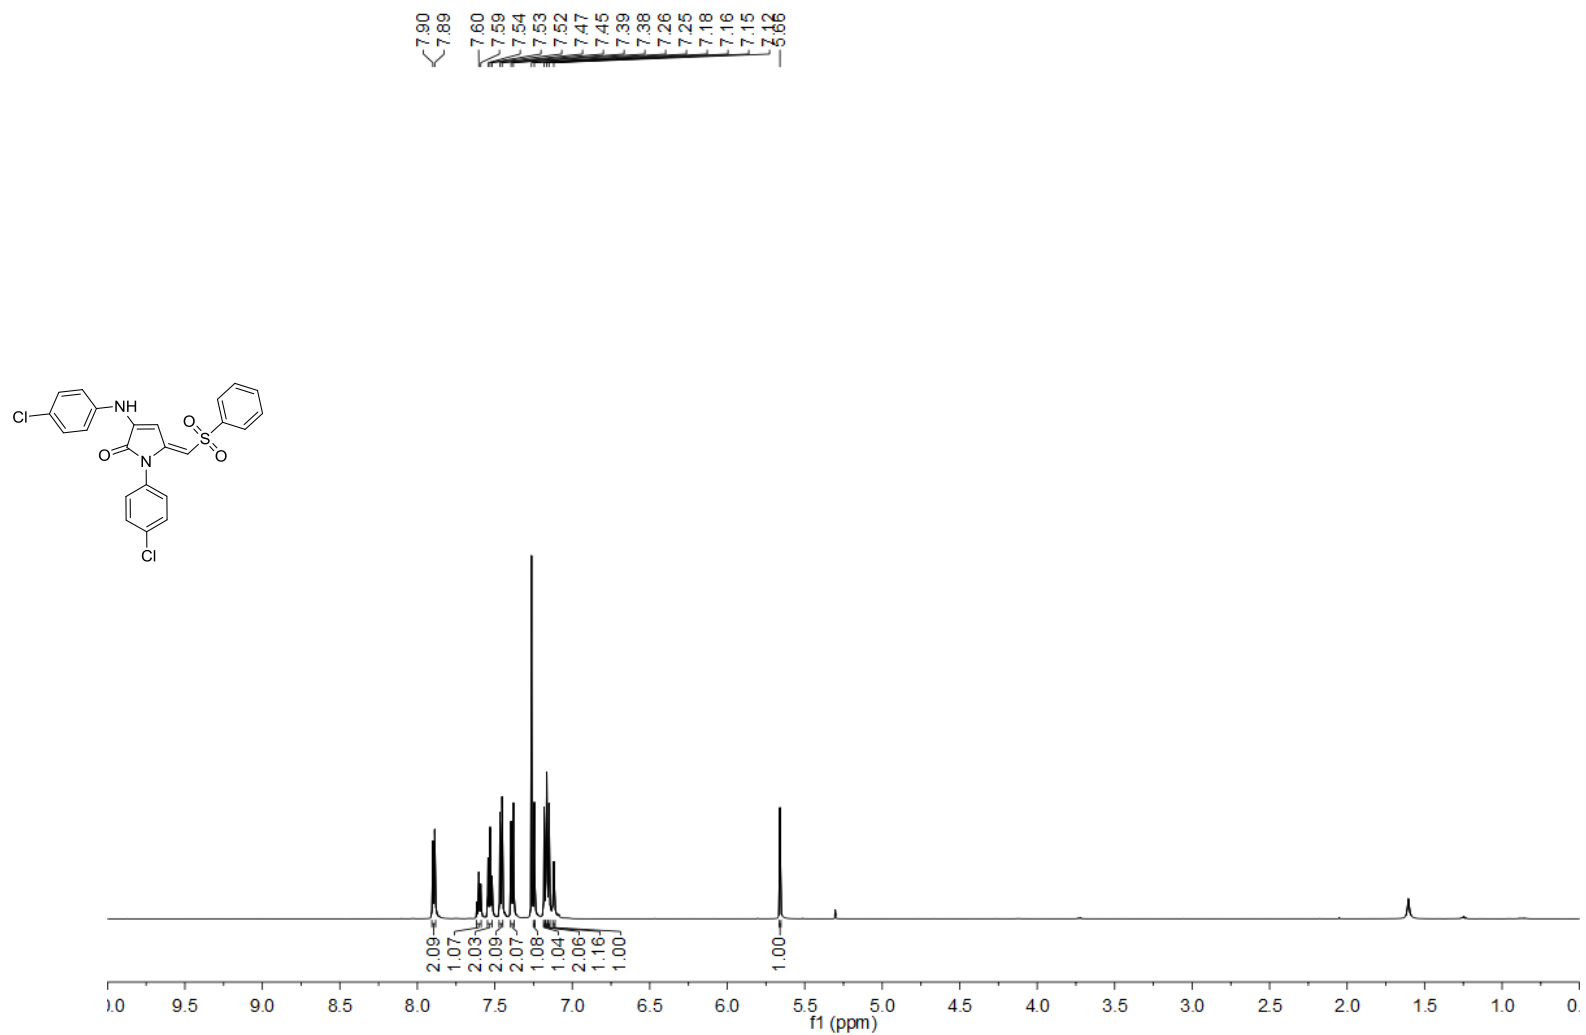

Figure S26. <sup>1</sup>H NMR (600 MHz, CDCl<sub>3</sub>) spectra of compound 4k

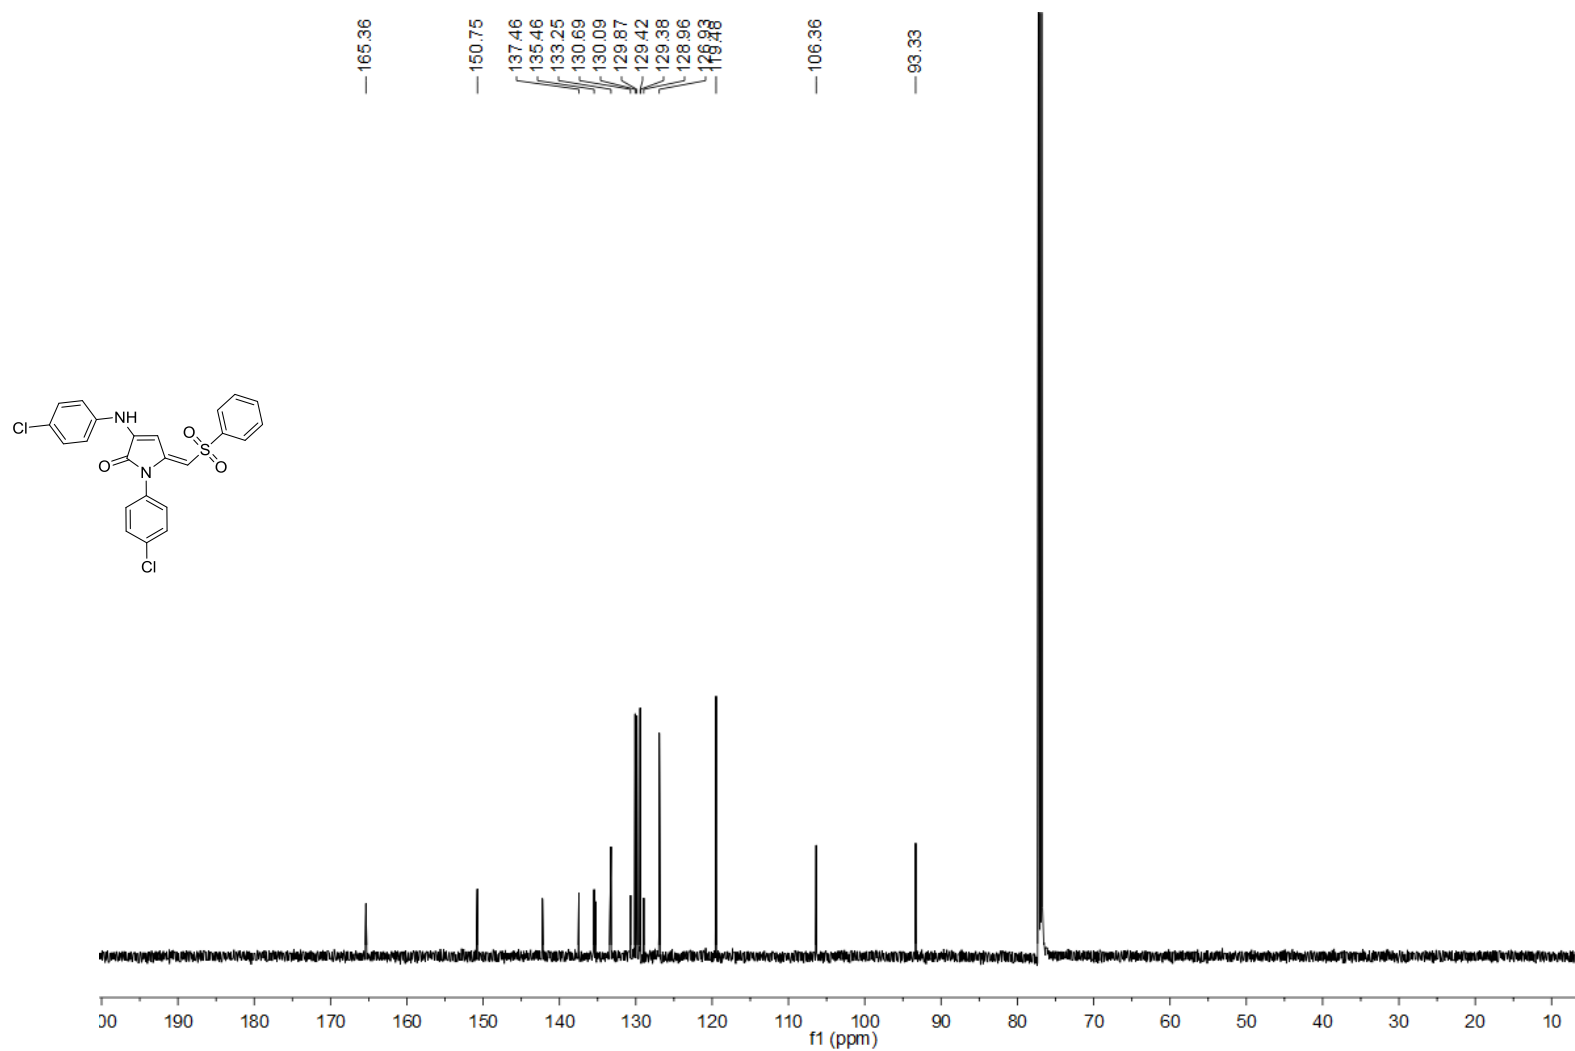

Figure S27. <sup>13</sup>C NMR (150 MHz, CDCl<sub>3</sub>) spectra of compound **4k**

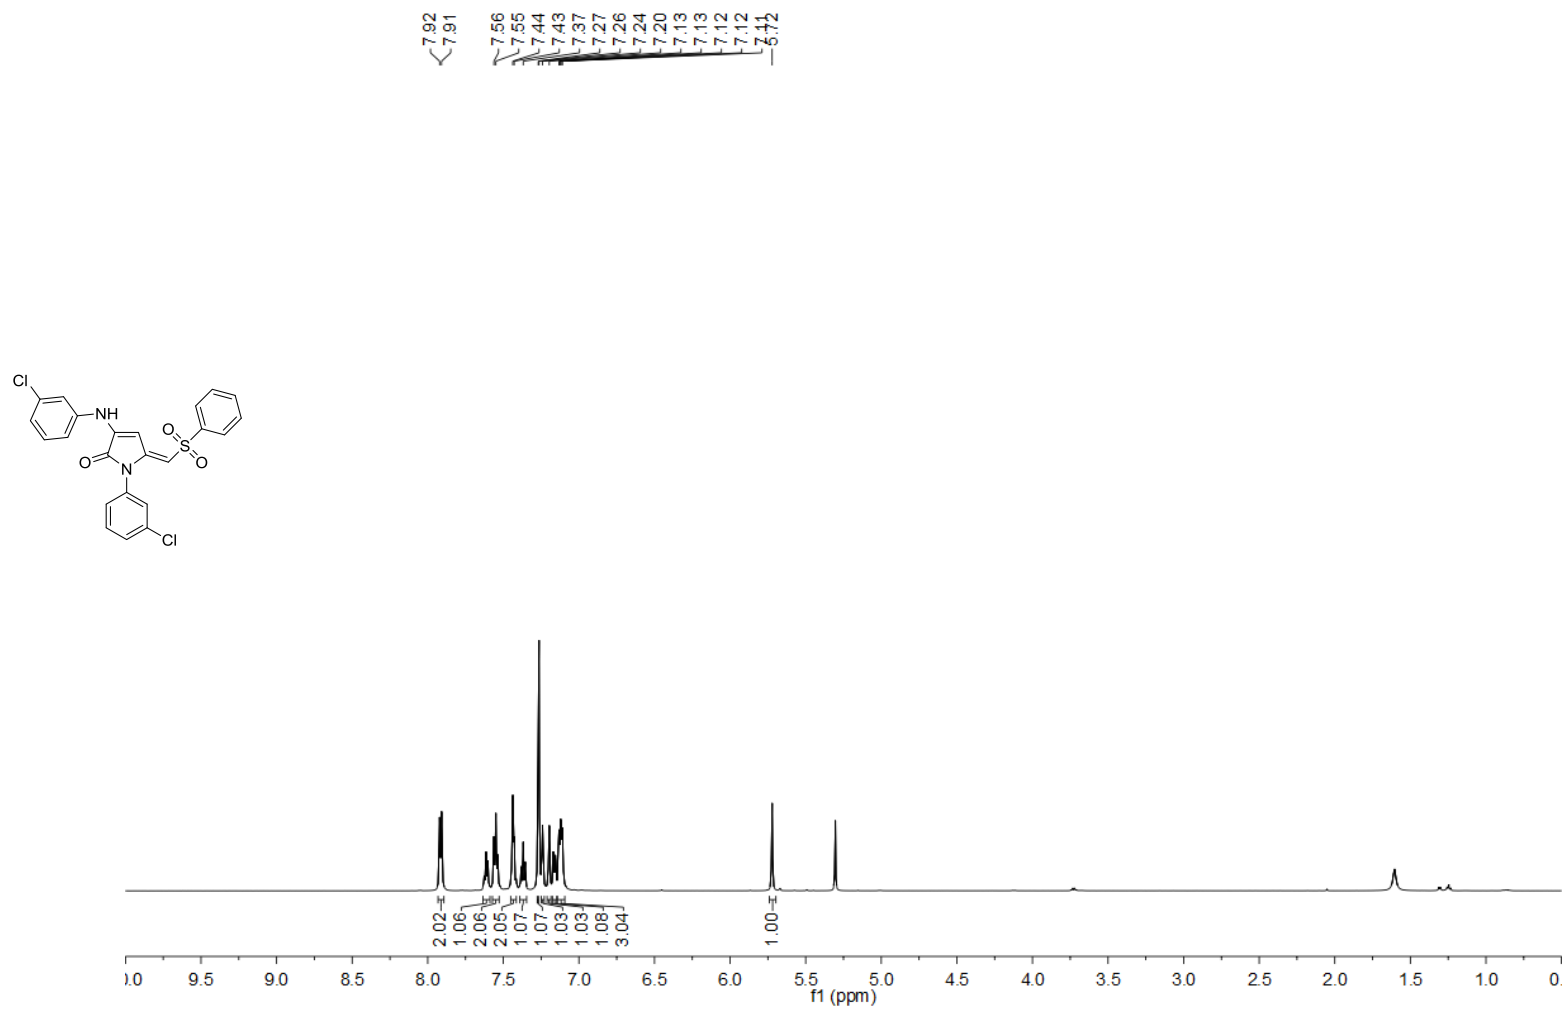

**Figure S28.** <sup>1</sup>H NMR (600 MHz, CDCl<sub>3</sub>) spectra of compound **41**



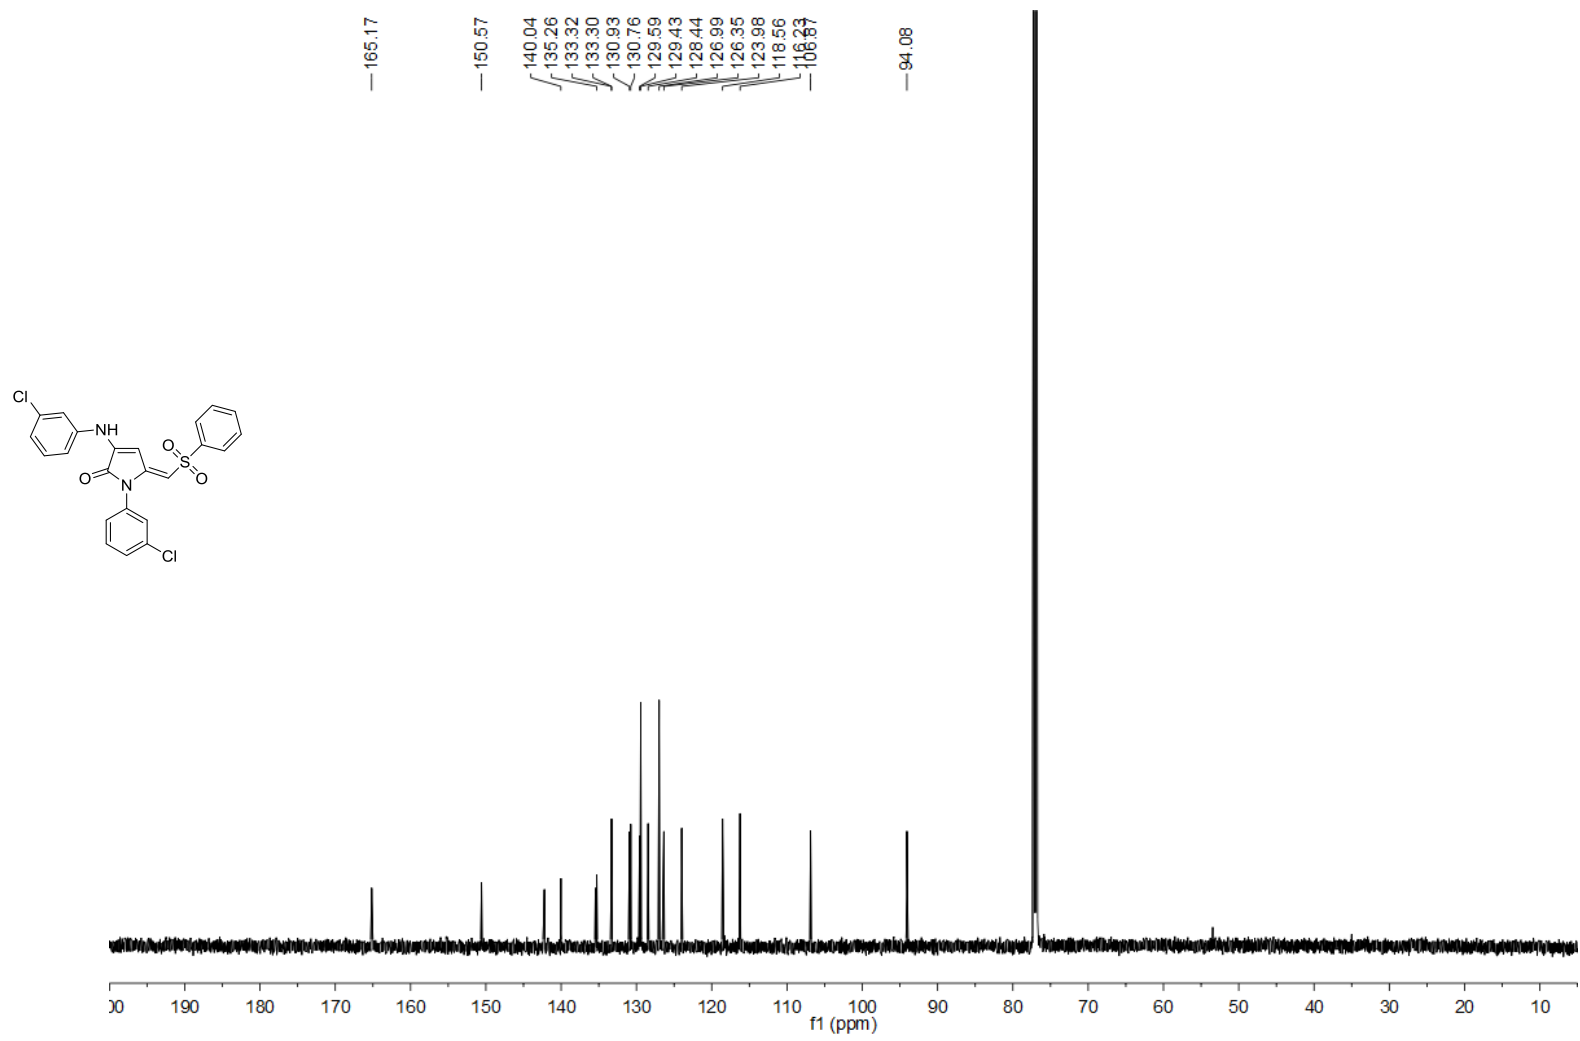

Figure S29. <sup>13</sup>C NMR (150 MHz, CDCl<sub>3</sub>) spectra of compound 4I

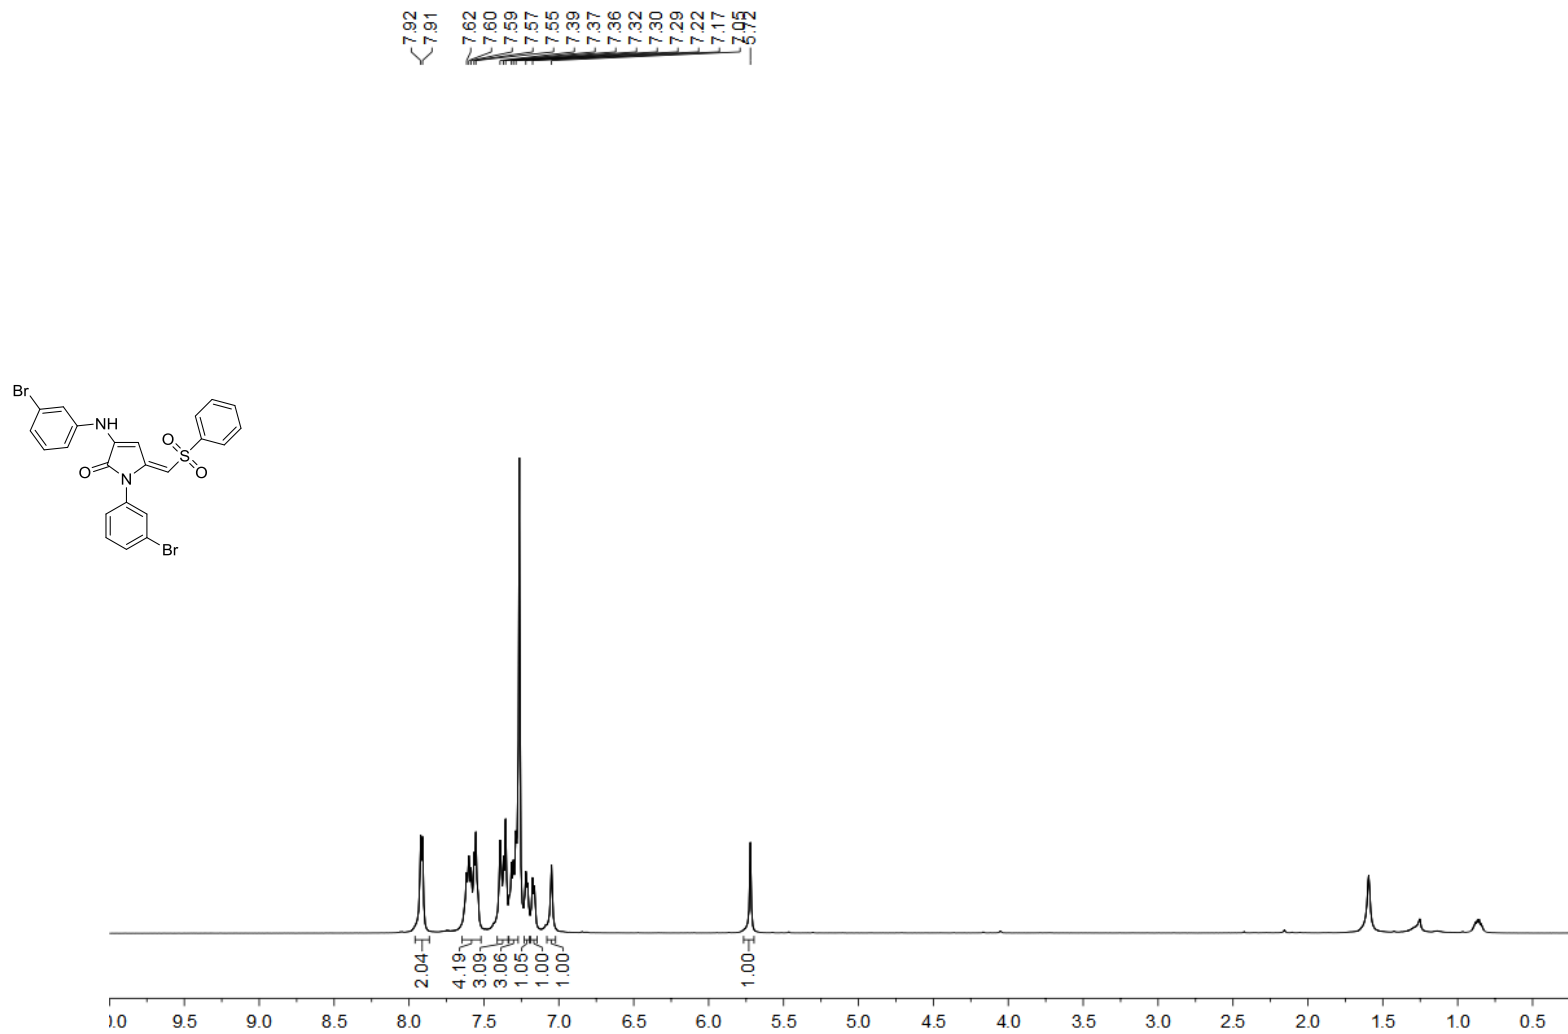

**Figure S30** <sup>1</sup>H NMR (600 MHz, CDCl<sub>3</sub>) spectra of compound **4m**

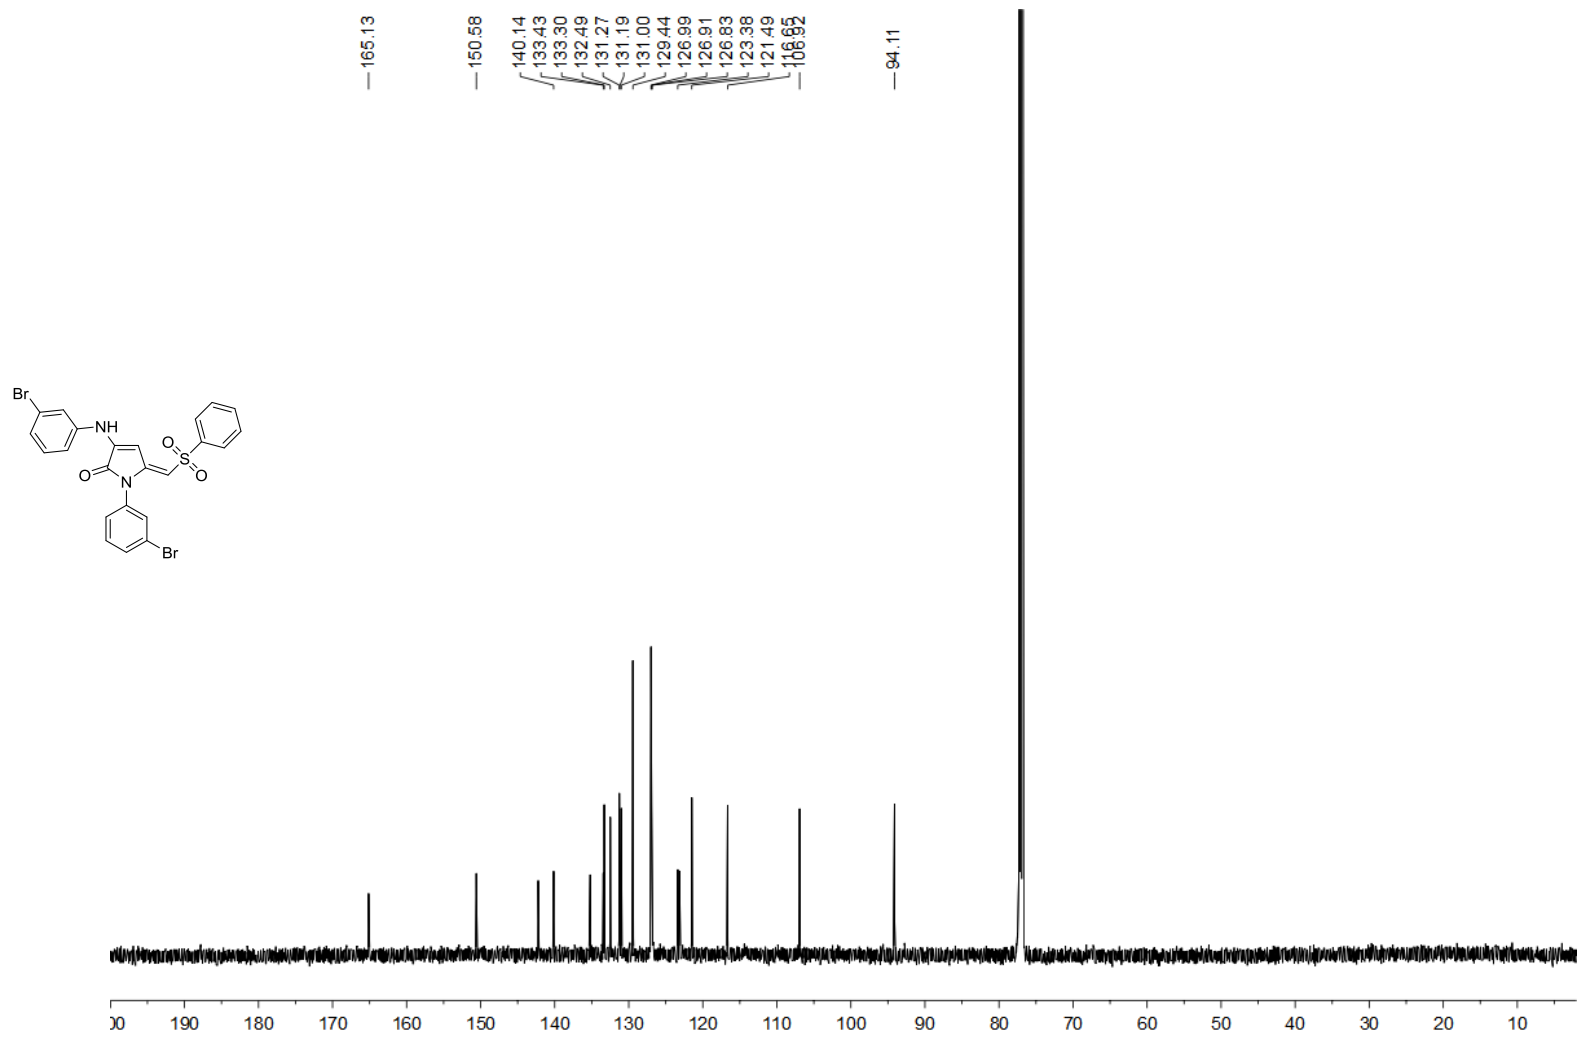

Figure S31. <sup>13</sup>C NMR (150 MHz, CDCl<sub>3</sub>) spectra of compound **4m**

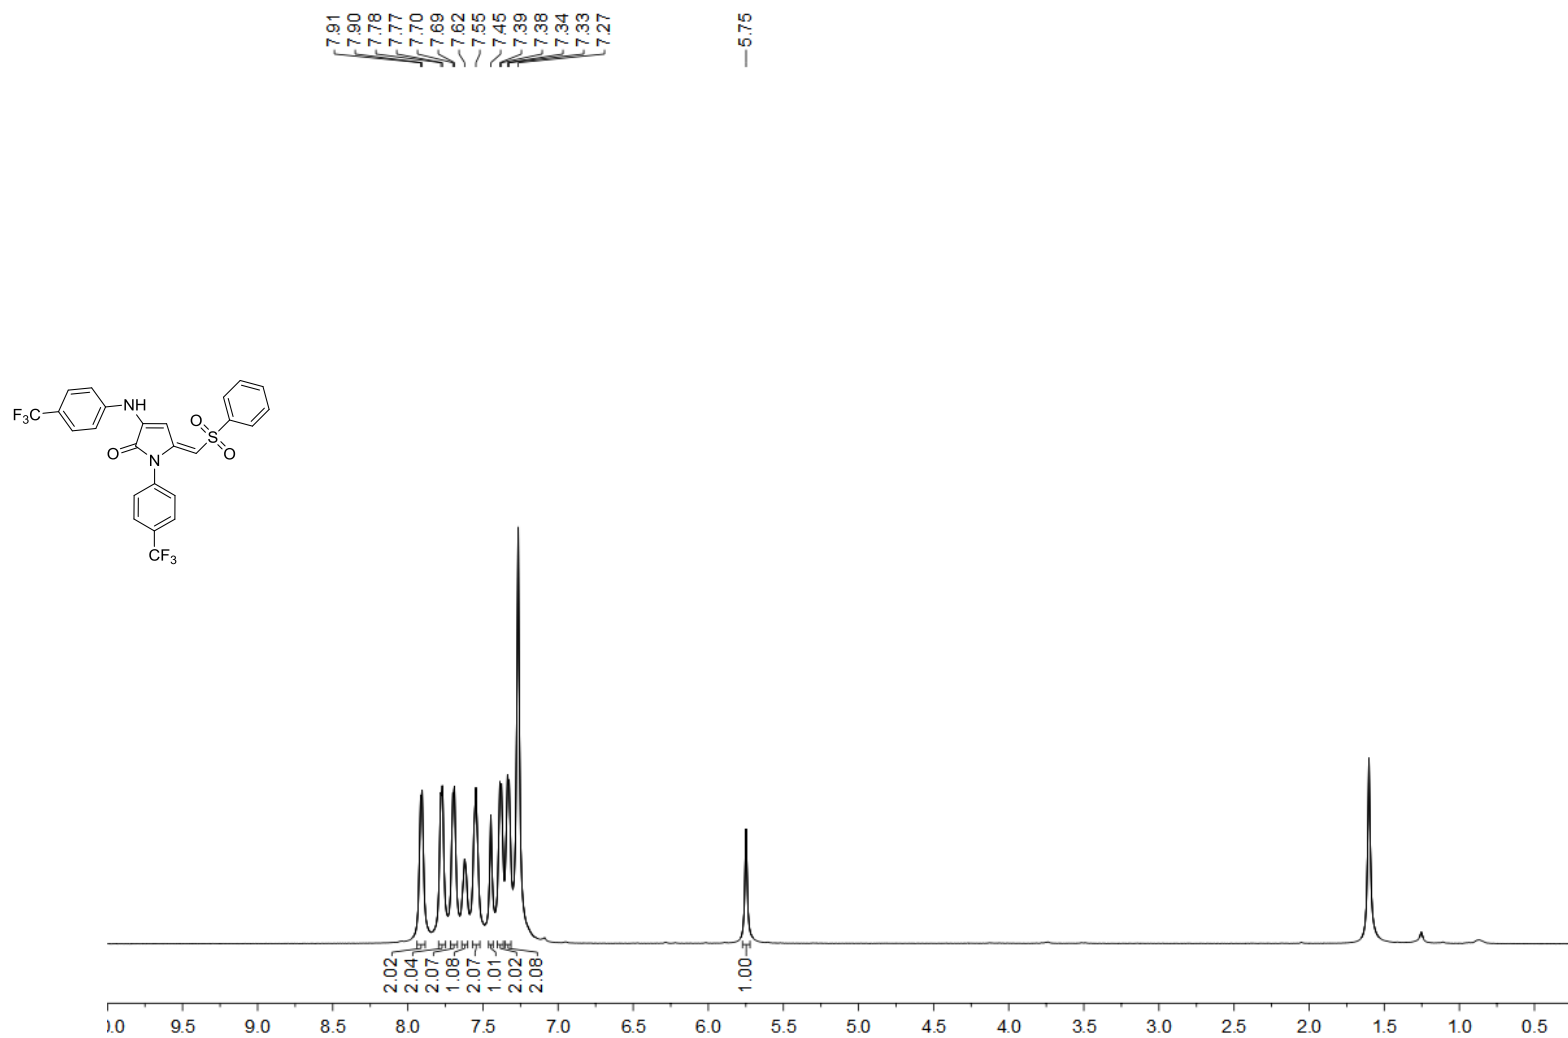

**Figure S32.** <sup>1</sup>H NMR (600 MHz, CDCl<sub>3</sub>) spectra of compound **4n**

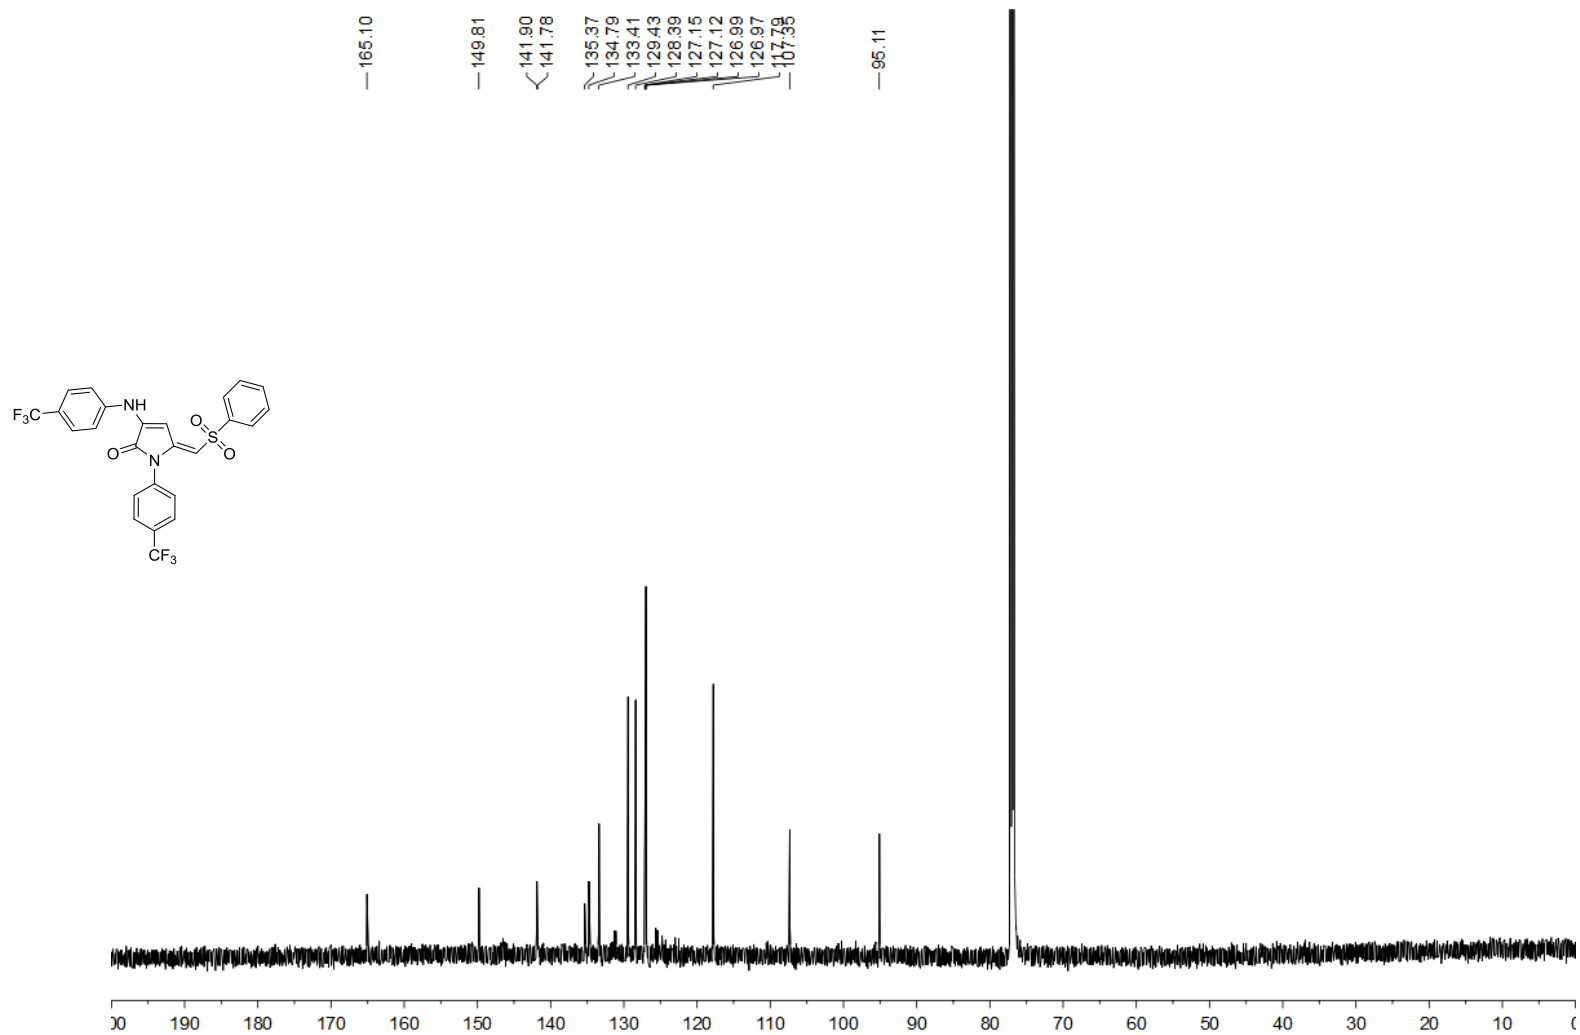

Figure S33. <sup>13</sup>C NMR (150 MHz, CDCl<sub>3</sub>) spectra of compound **4n**

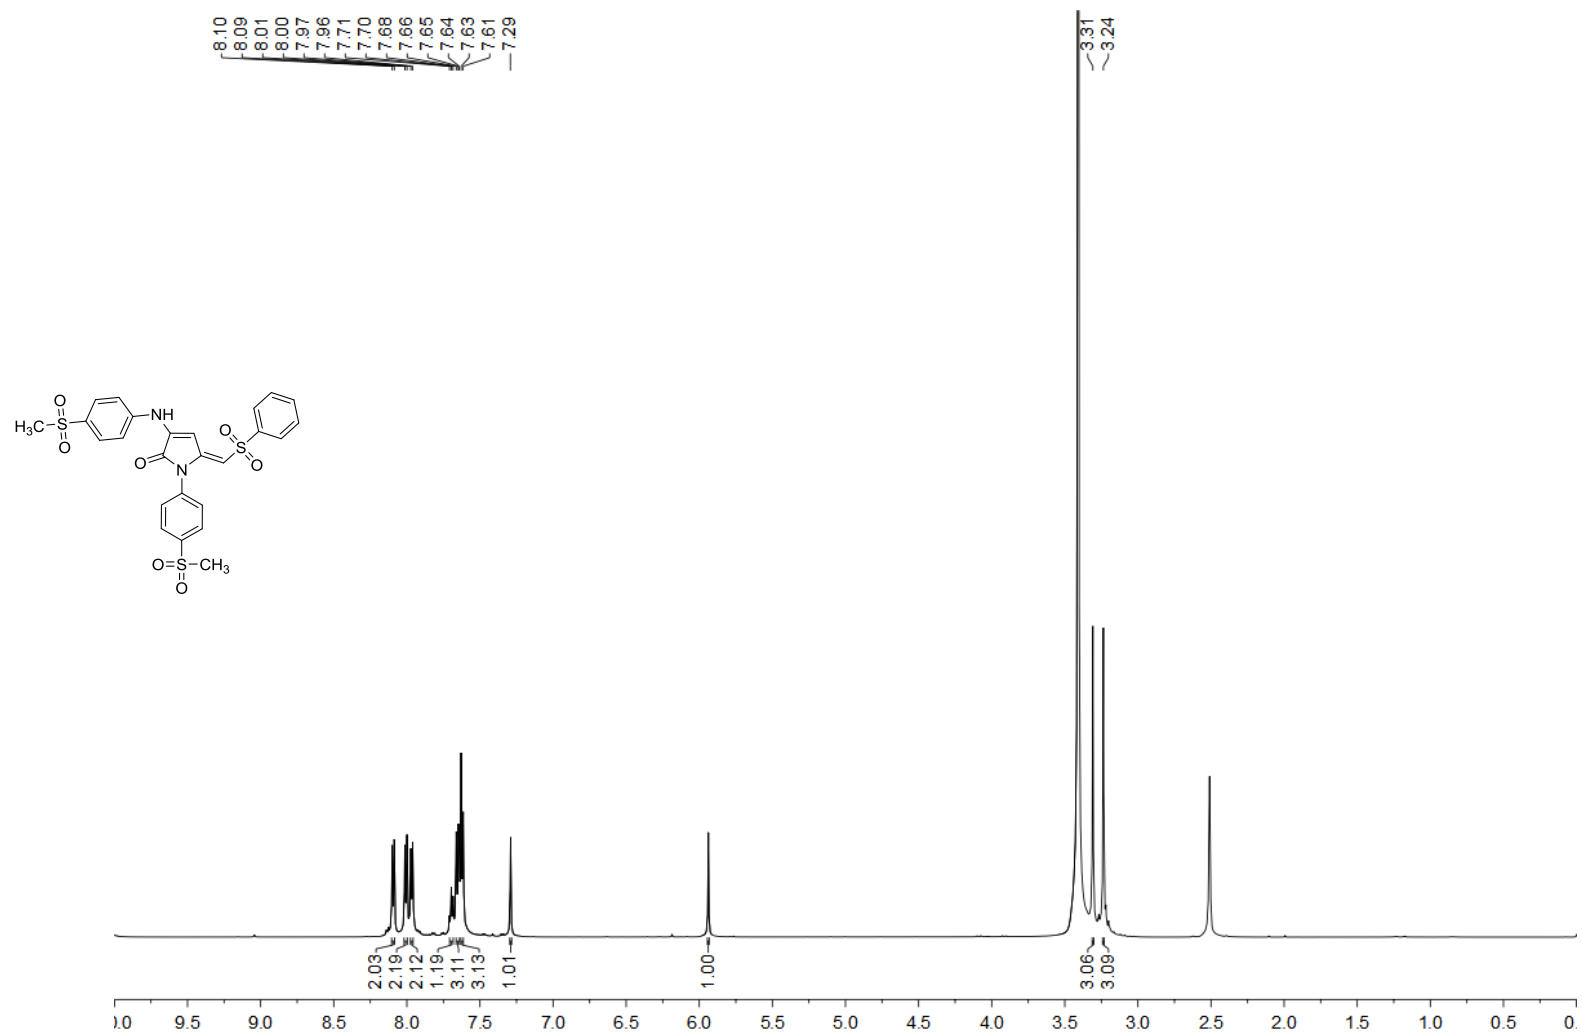

Figure S34. <sup>1</sup>H NMR (600 MHz, DMSO-*d*<sub>6</sub>) spectra of compound **4o**

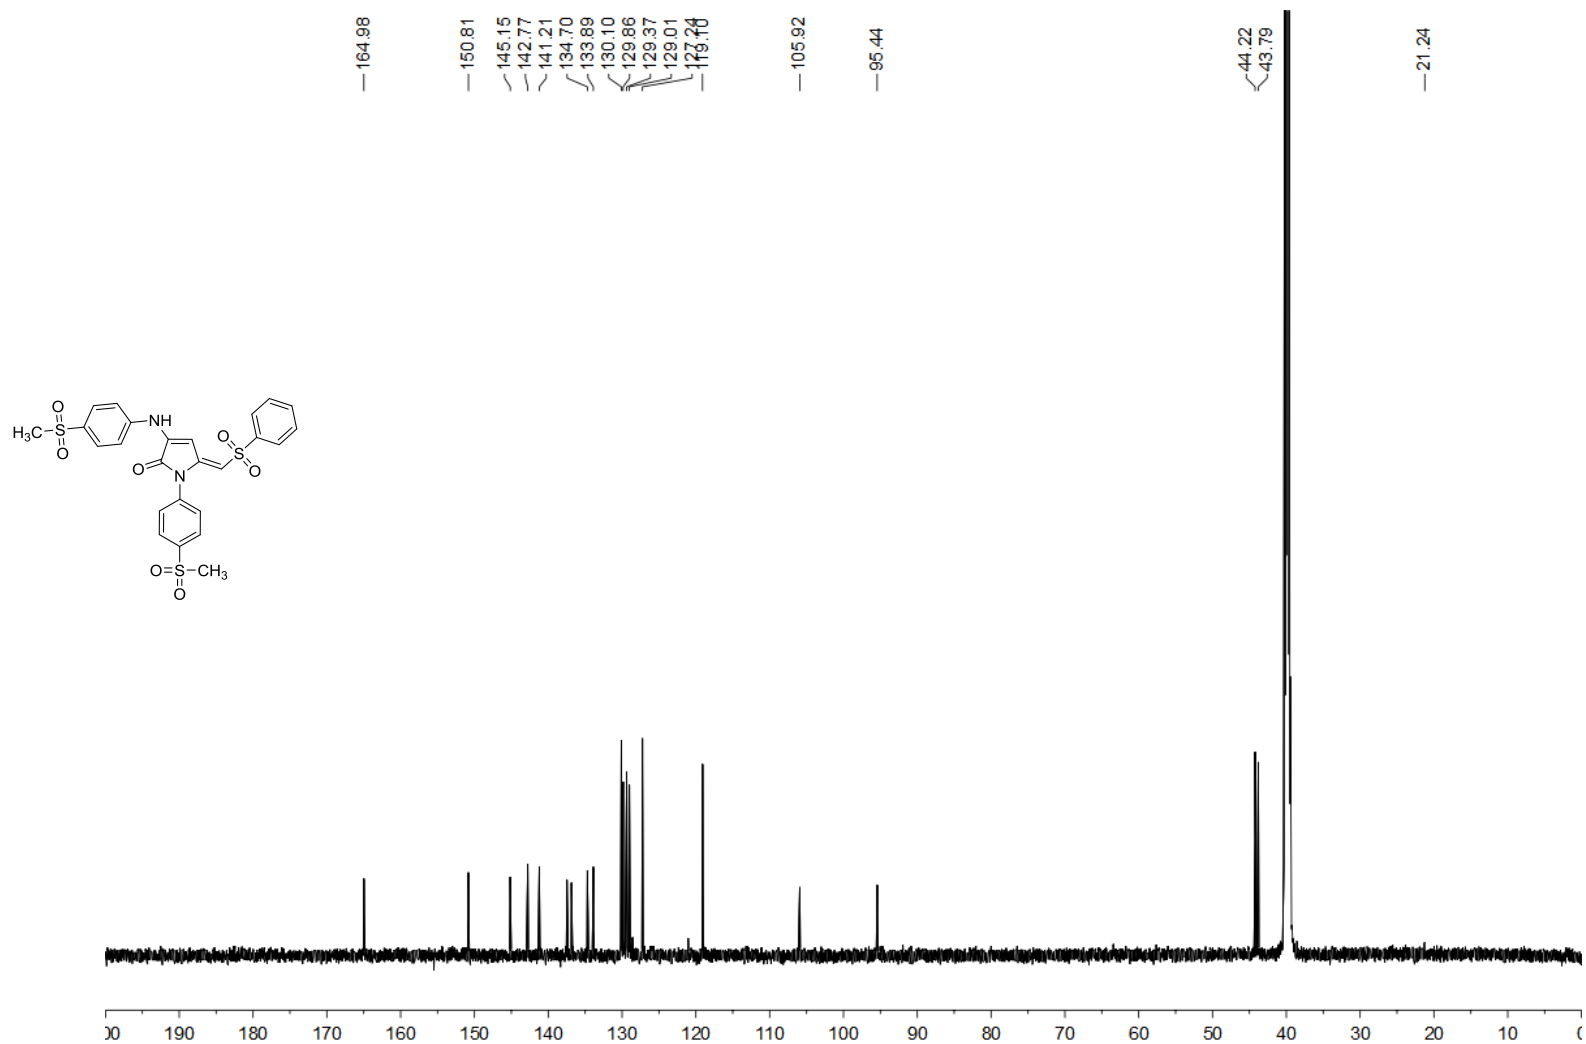

Figure S35. <sup>13</sup>C NMR (150 MHz, DMSO-*d*<sub>6</sub>) spectra of compound **4o**

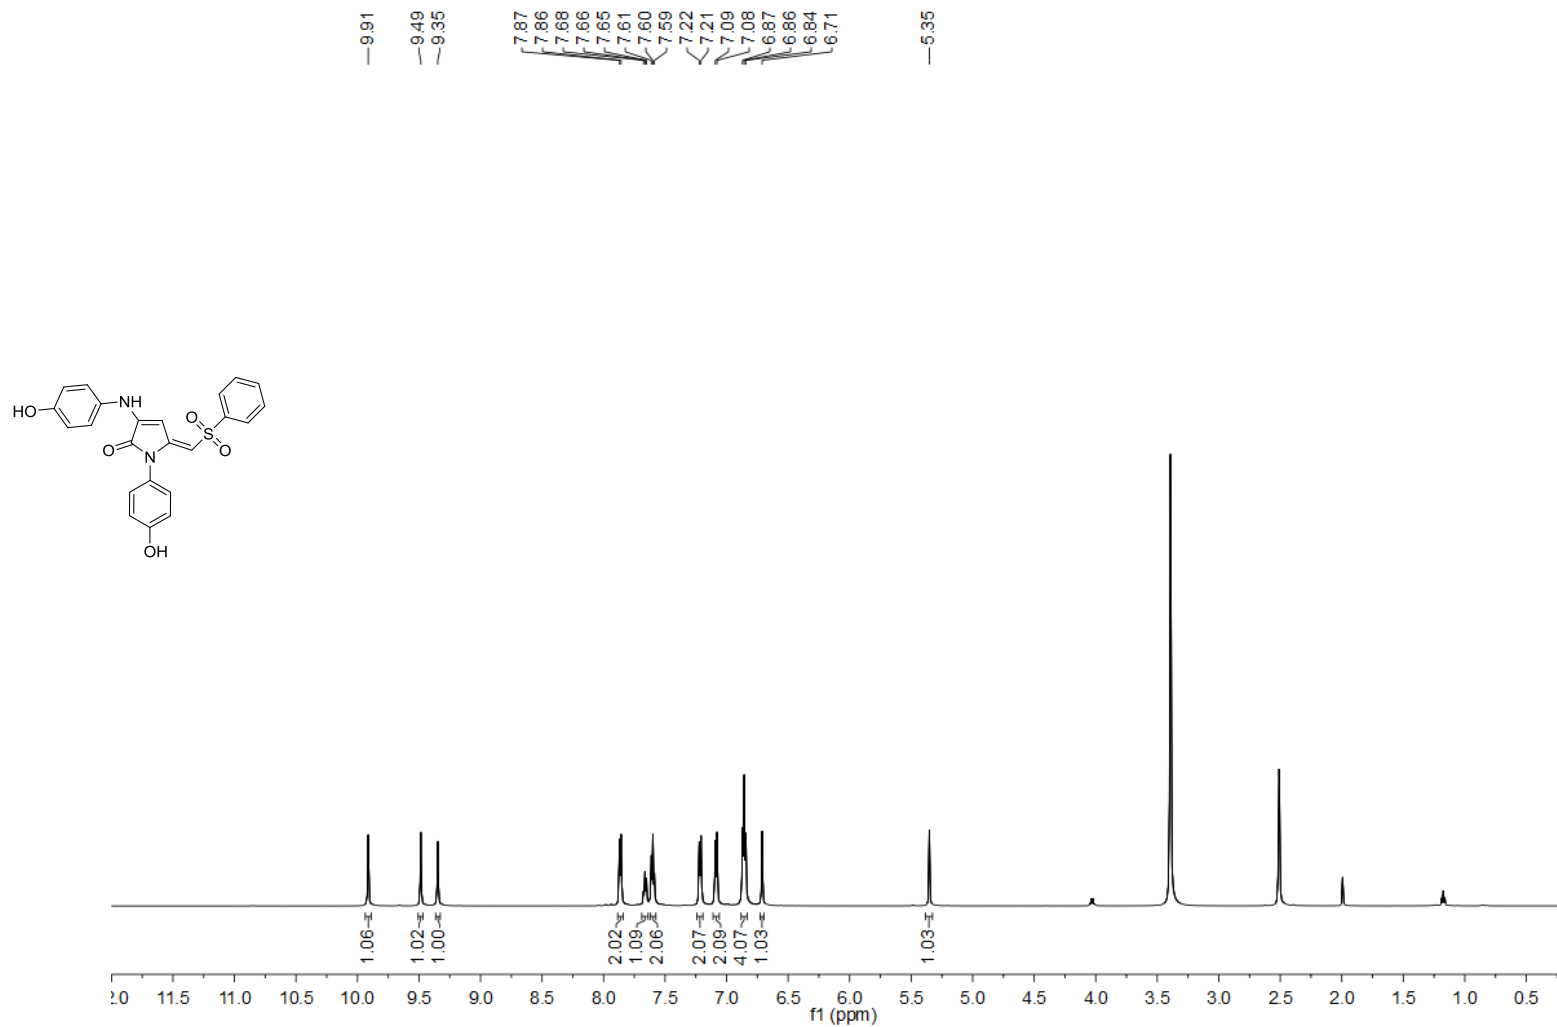

**Figure S36.** <sup>1</sup>H NMR (600 MHz, DMSO-*d*<sub>6</sub>) spectra of compound **4p**



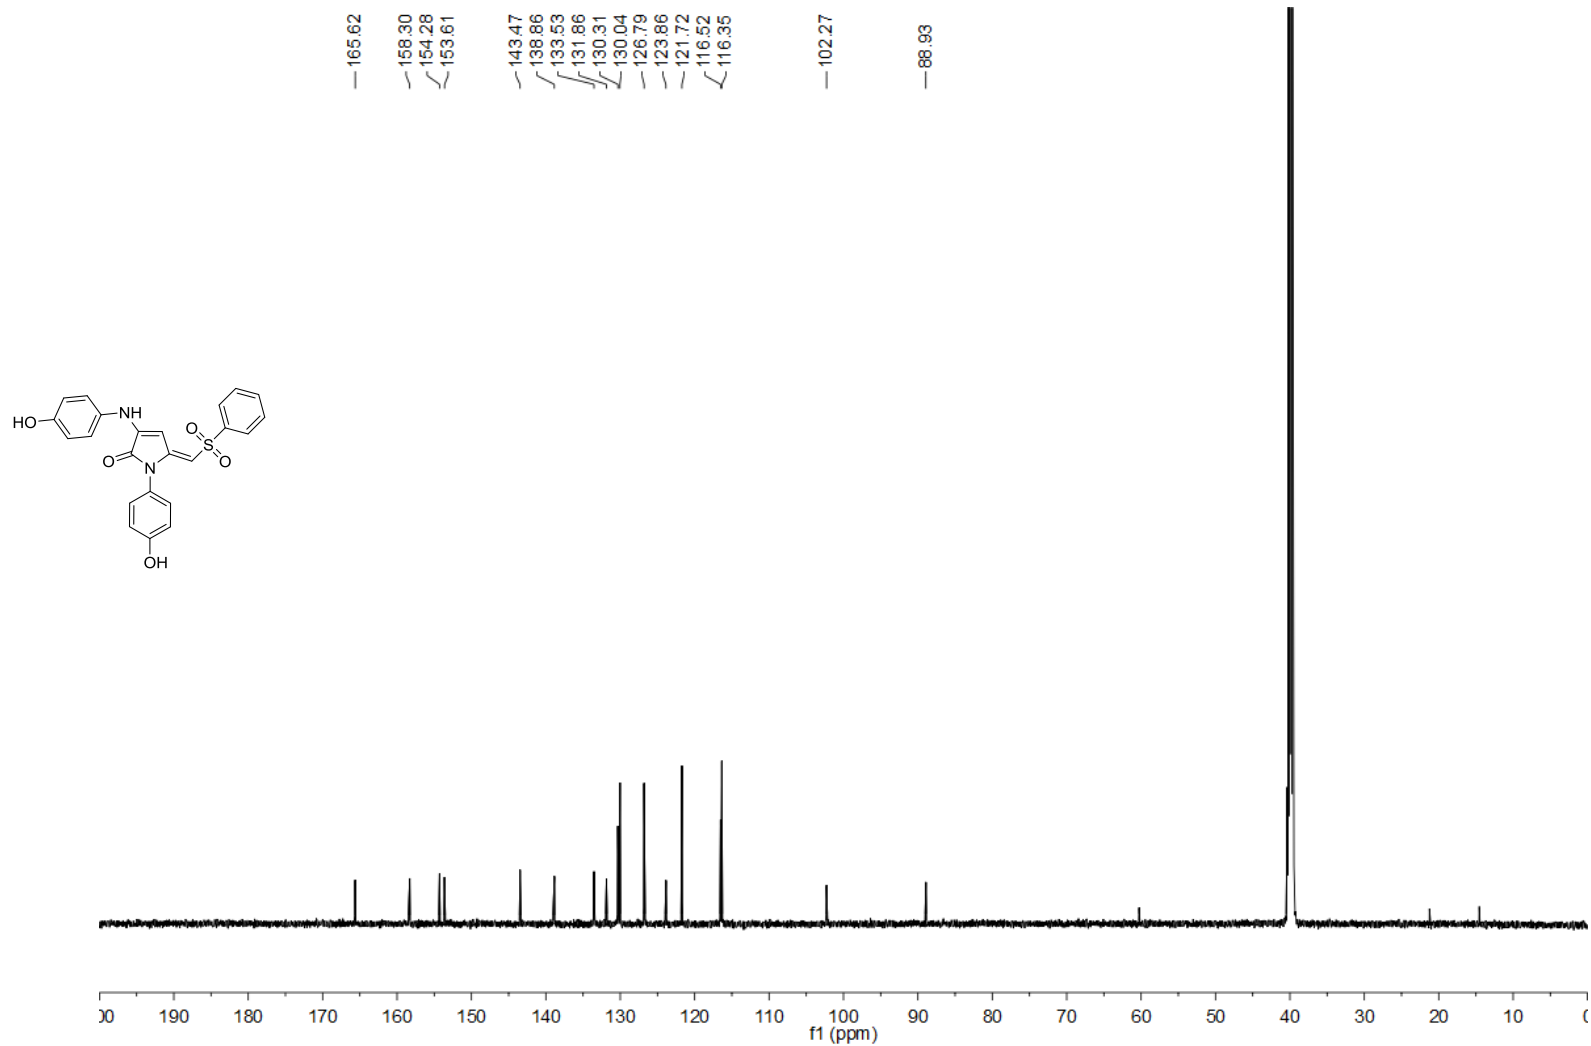

Figure S37. <sup>13</sup>C NMR (150 MHz, DMSO-*d*<sub>6</sub>) spectra of compound **4p**

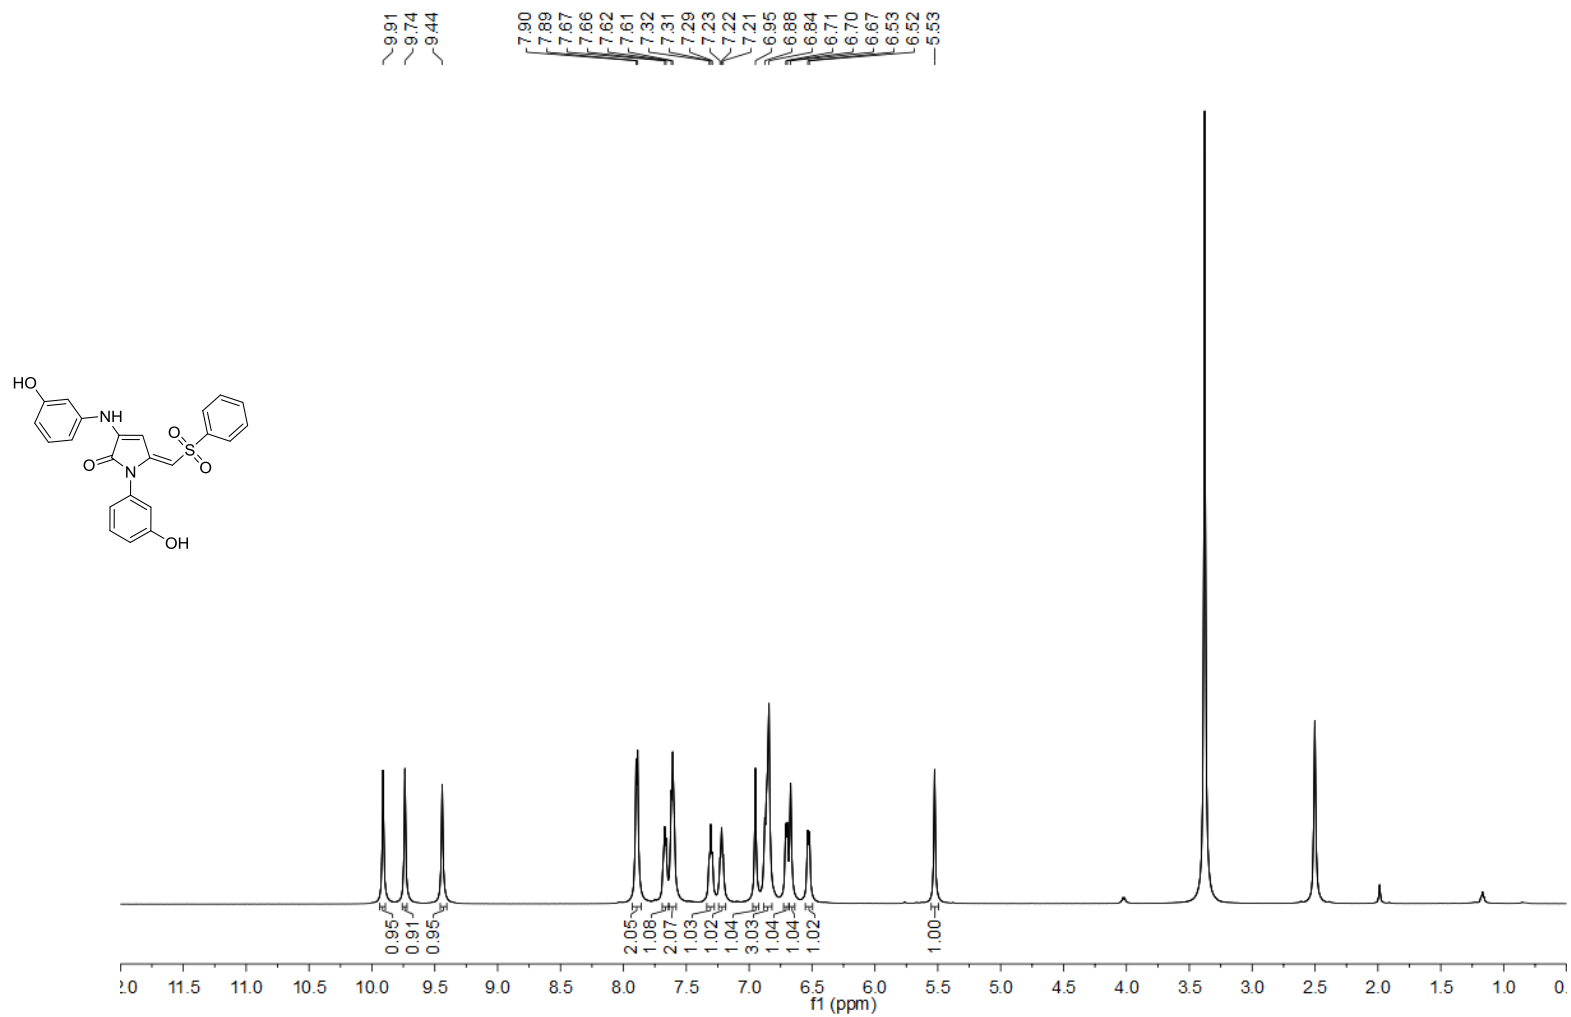

Figure S38. <sup>1</sup>H NMR (600 MHz, DMSO-*d*<sub>6</sub>) spectra of compound **4q**

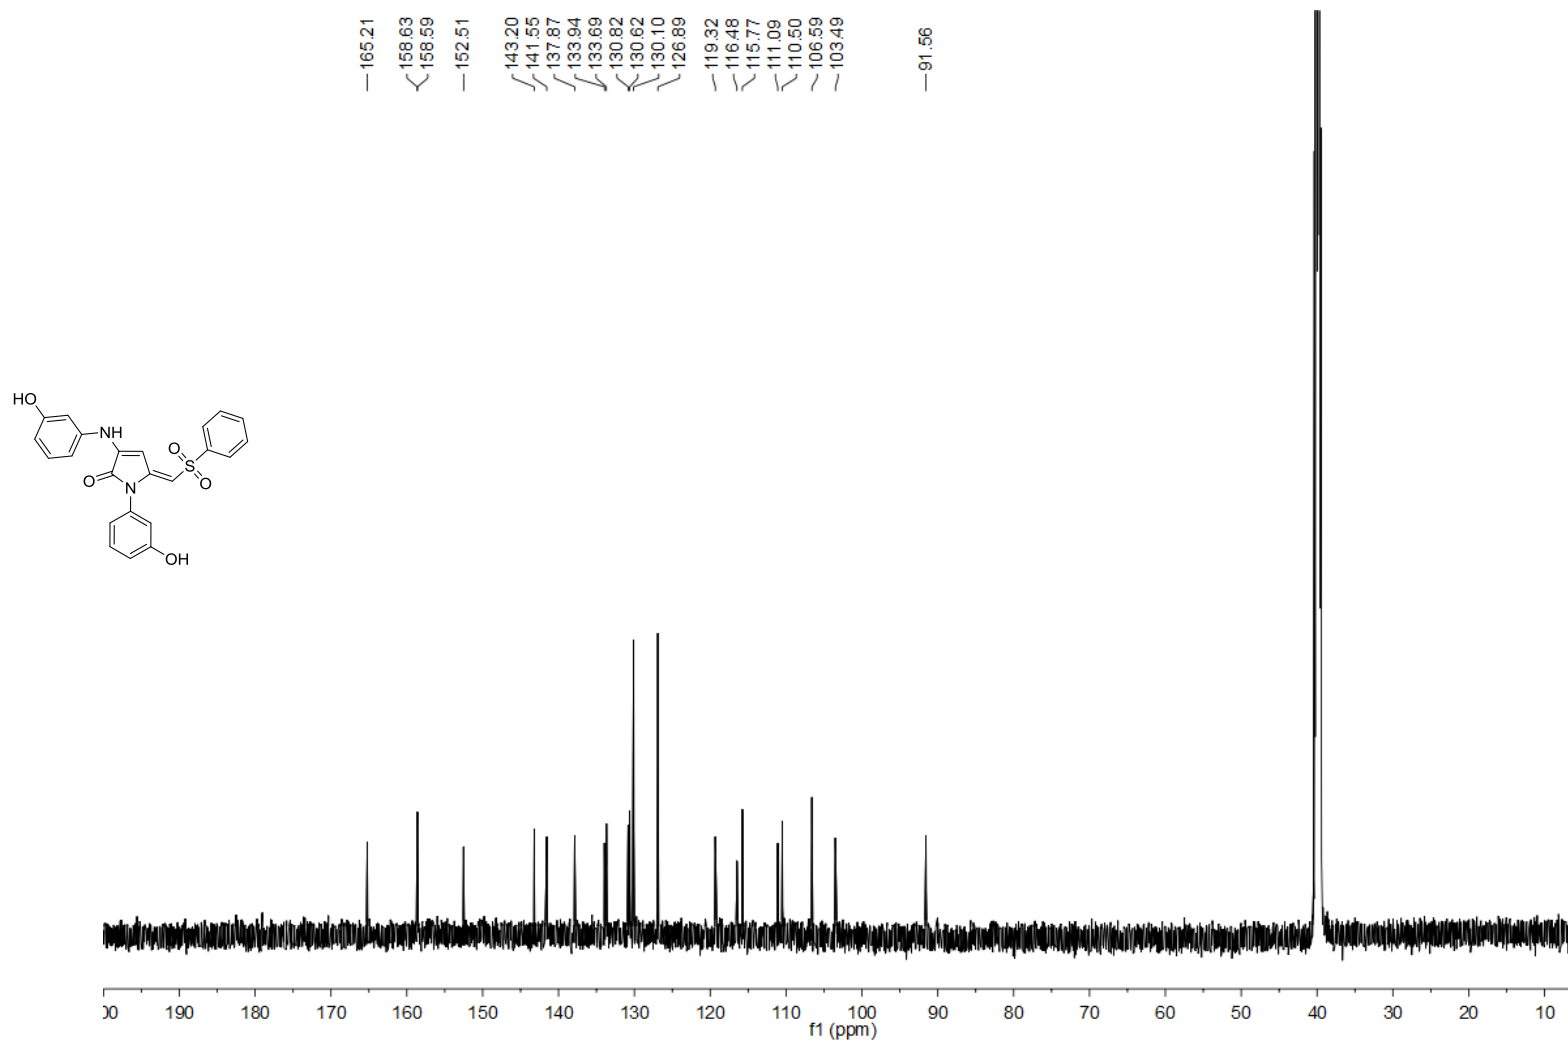

**Figure S39.** <sup>13</sup>C NMR (150 MHz, DMSO-*d*<sub>6</sub>) spectra of compound **4q**

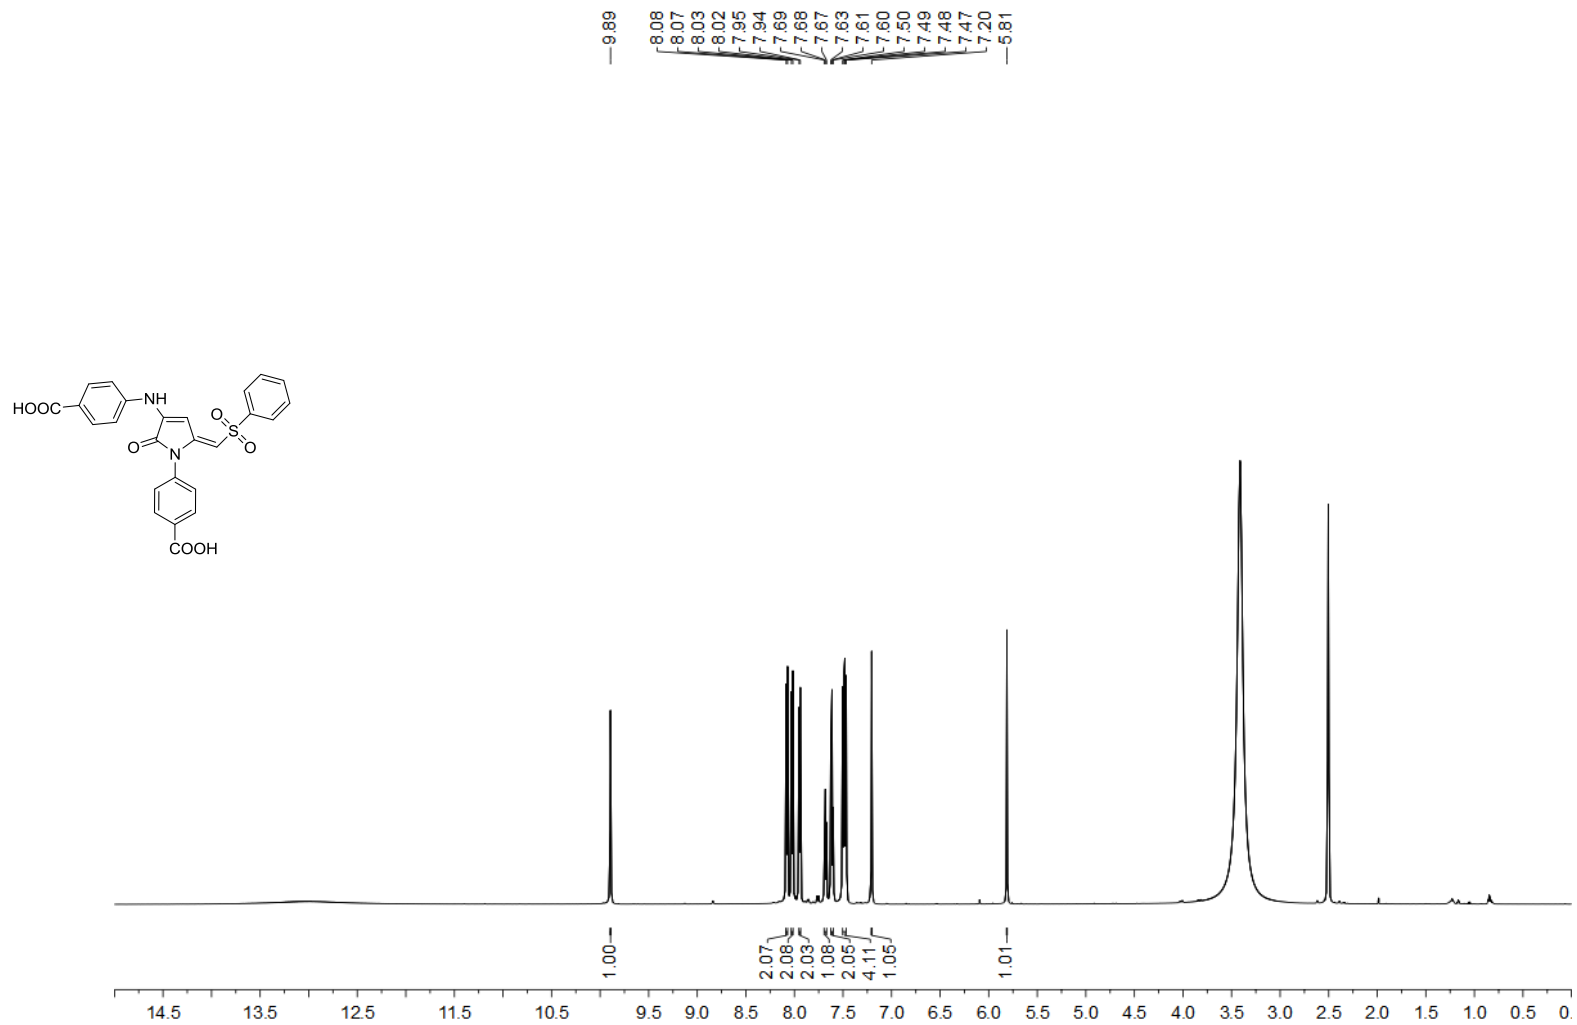

**Figure S40.**  $^1\text{H}$  NMR (600 MHz,  $\text{DMSO-}d_6$ ) spectra of compound **4r**

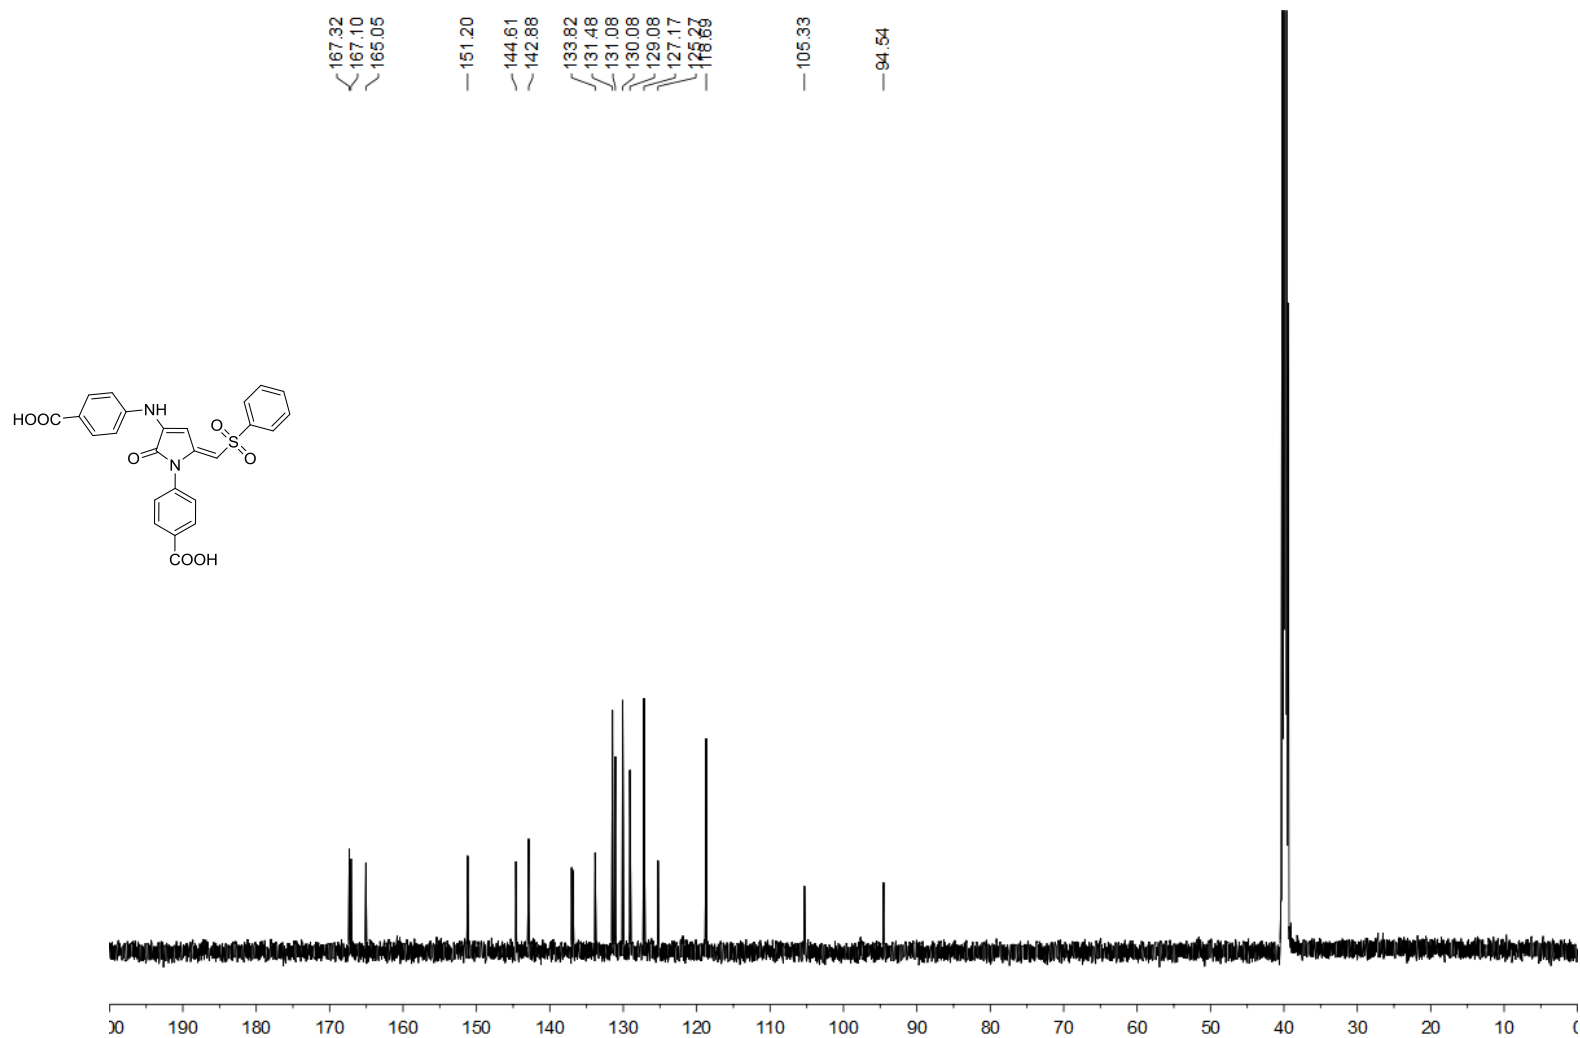

Figure S41. <sup>13</sup>C NMR (150 MHz, DMSO-*d*<sub>6</sub>) spectra of compound **4r**

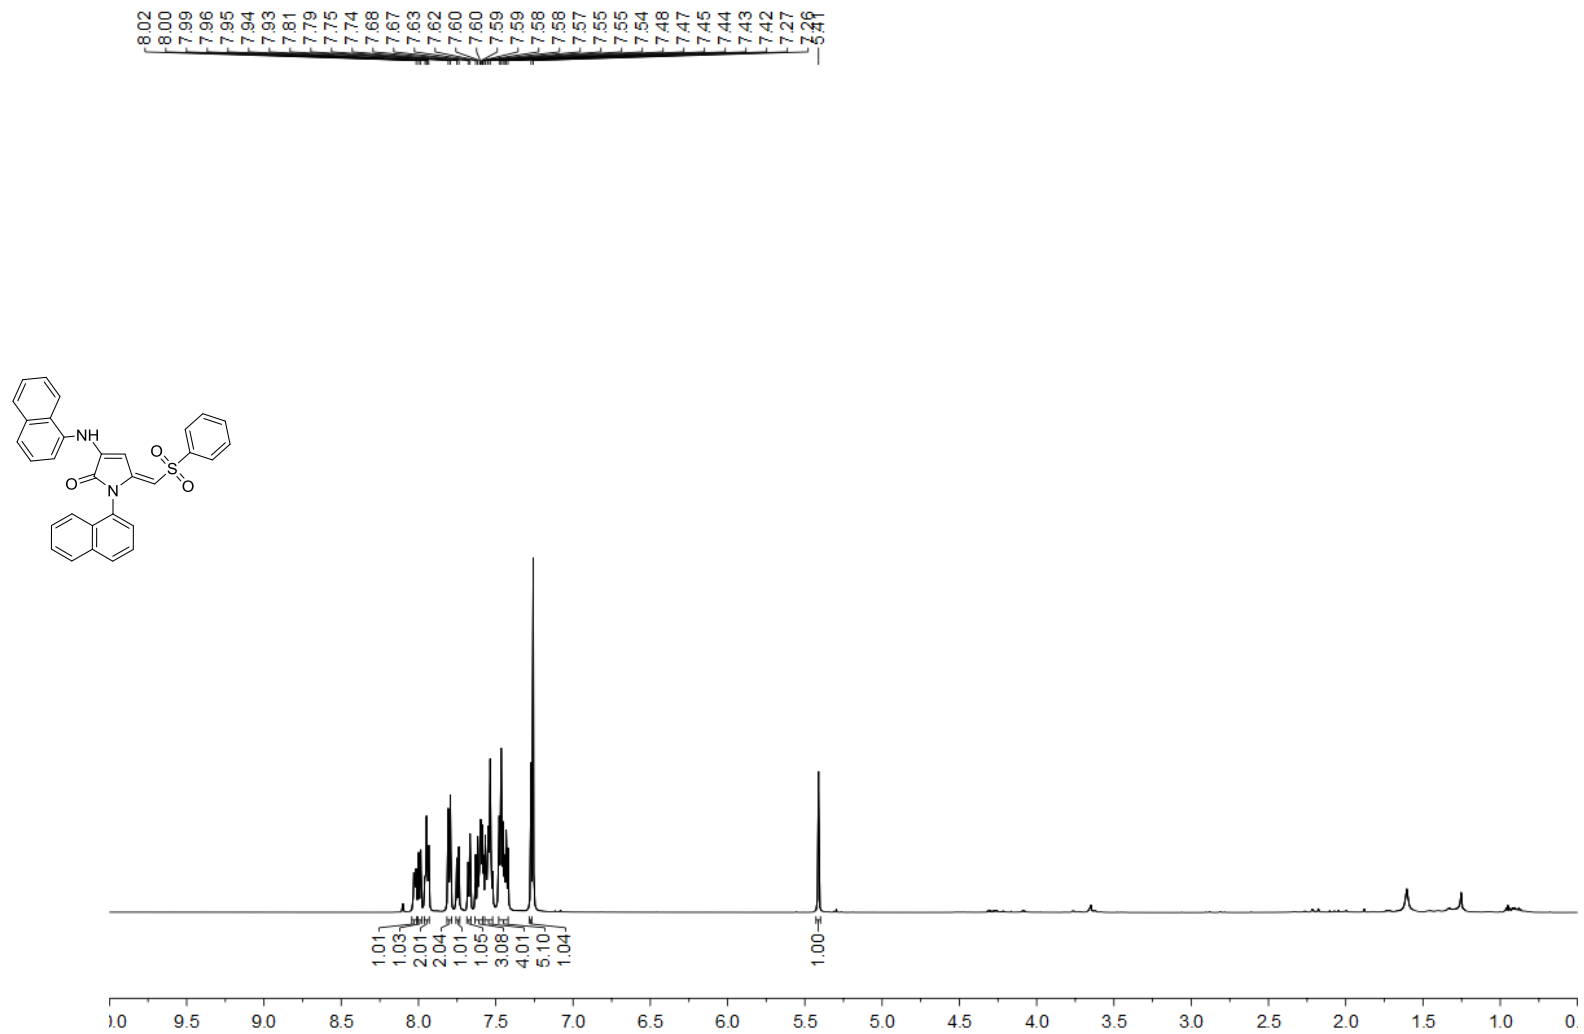

Figure S42. <sup>1</sup>H NMR (600 MHz, CDCl<sub>3</sub>) spectra of compound 4s

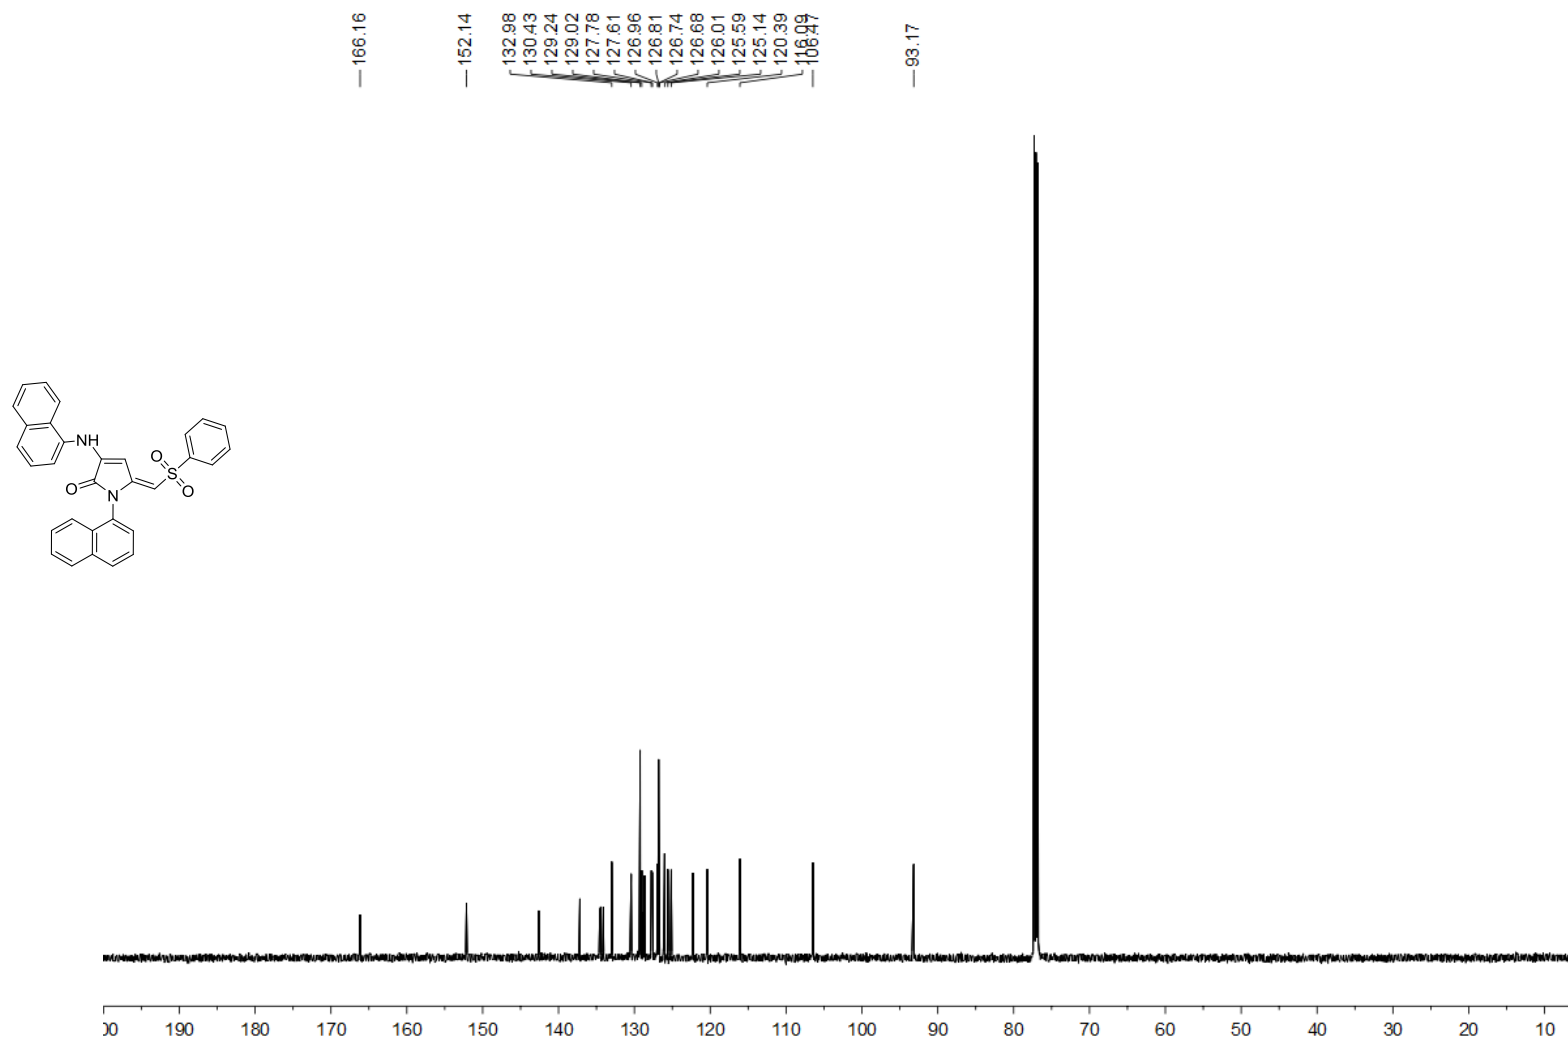

Figure S43. <sup>13</sup>C NMR (150 MHz, CDCl<sub>3</sub>) spectra of compound 4s

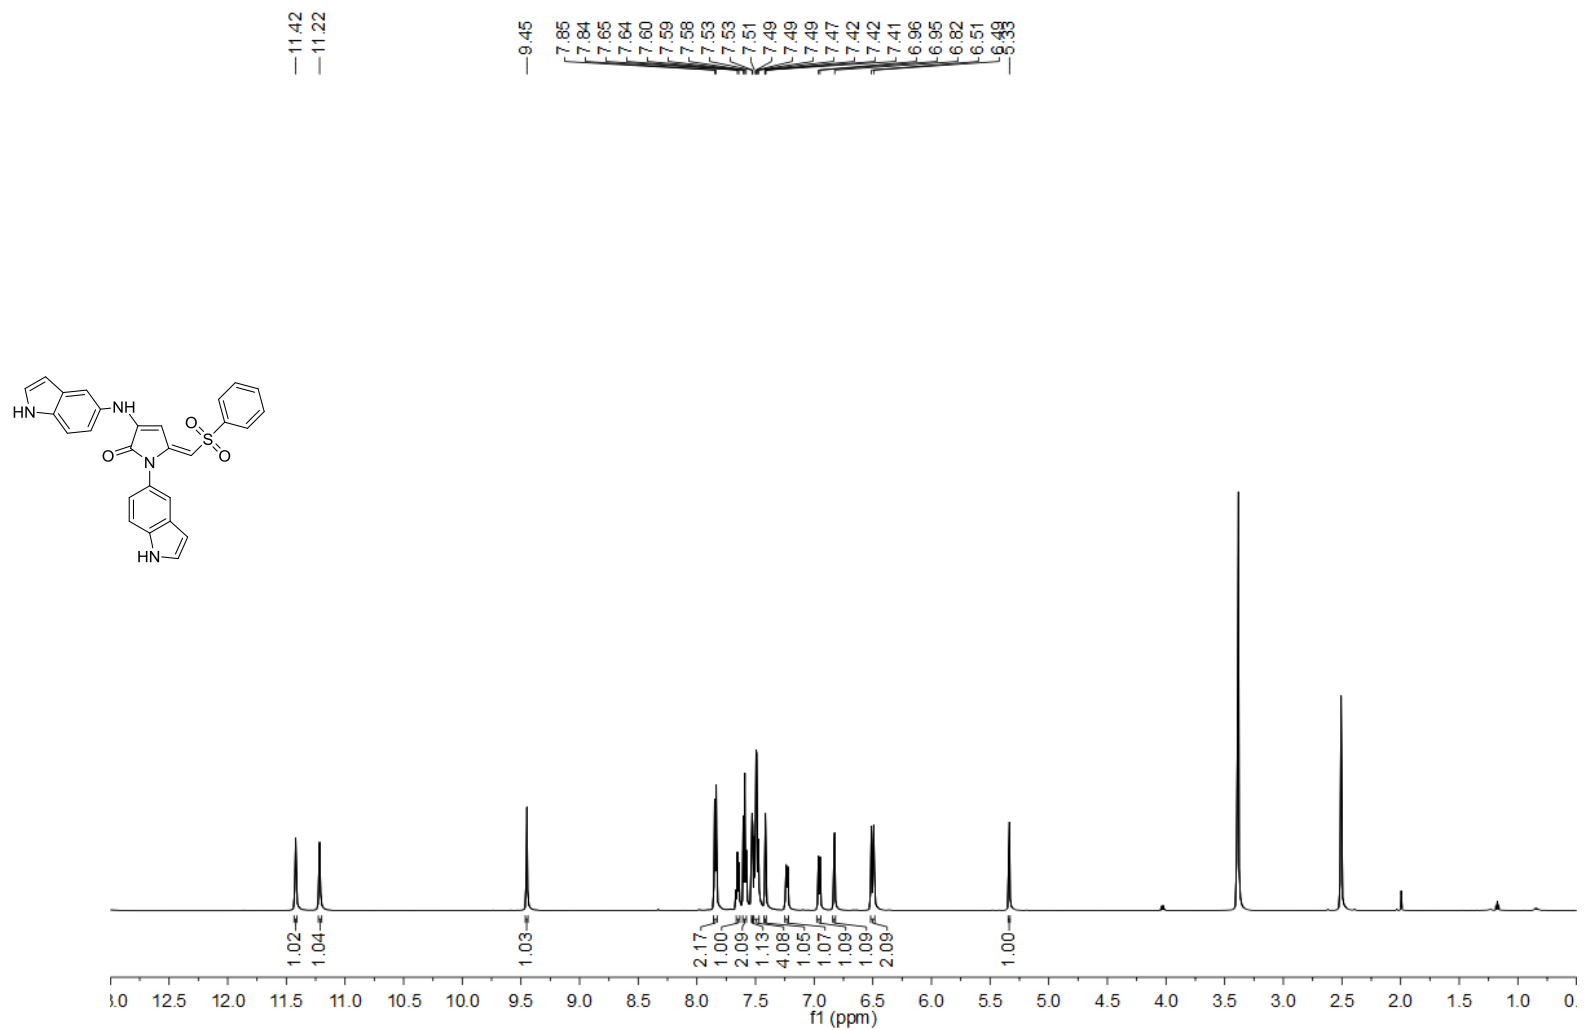

**Figure S44.** <sup>1</sup>H NMR (600 MHz, DMSO-*d*<sub>6</sub>) spectra of compound **4t**



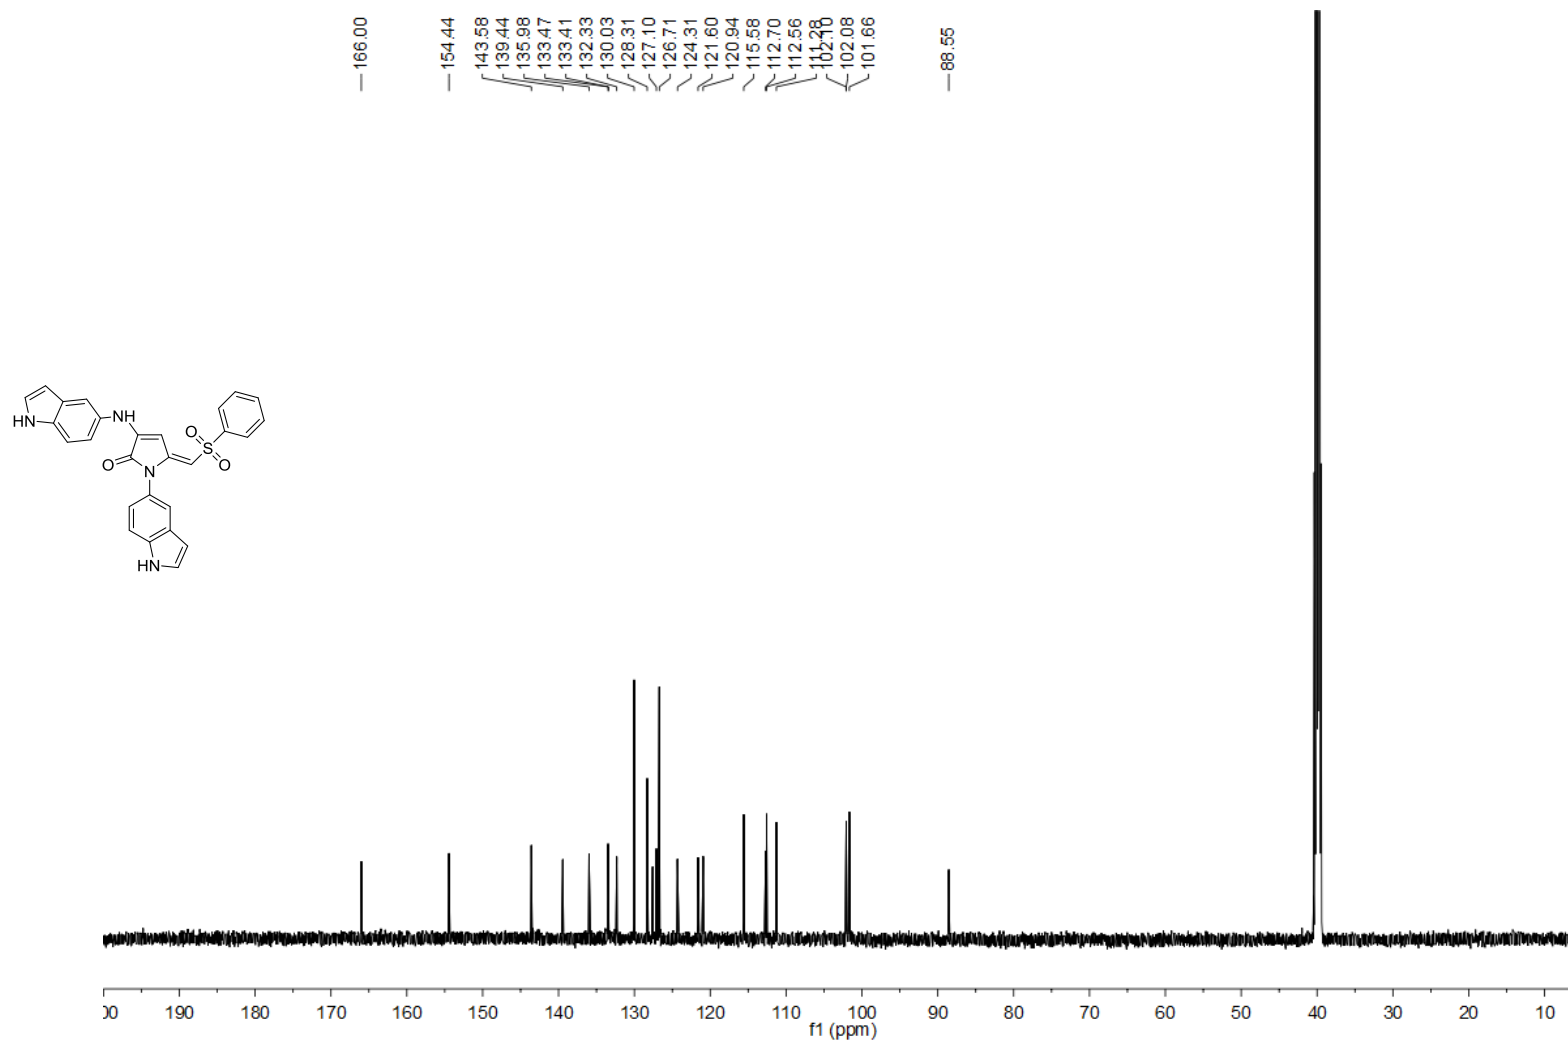

Figure S45. <sup>13</sup>C NMR (150 MHz, DMSO-*d*<sub>6</sub>) spectra of compound **4t**

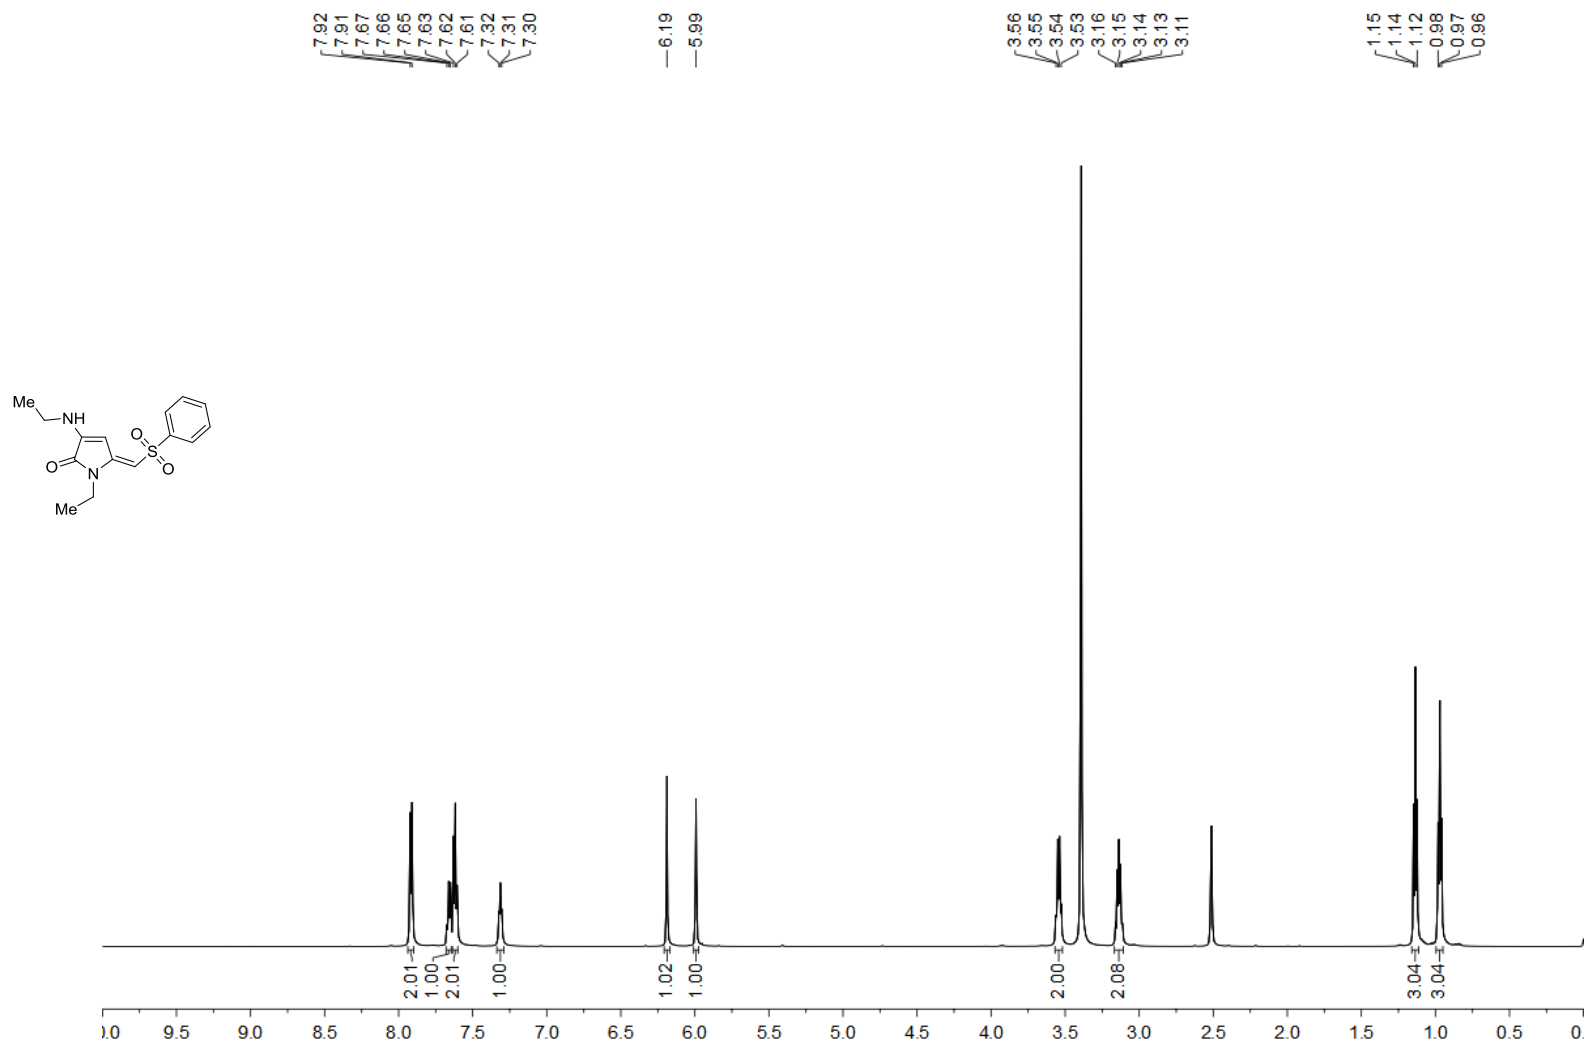

Figure S46. <sup>1</sup>H NMR (600 MHz, DMSO-*d*<sub>6</sub>) spectra of compound **4u**

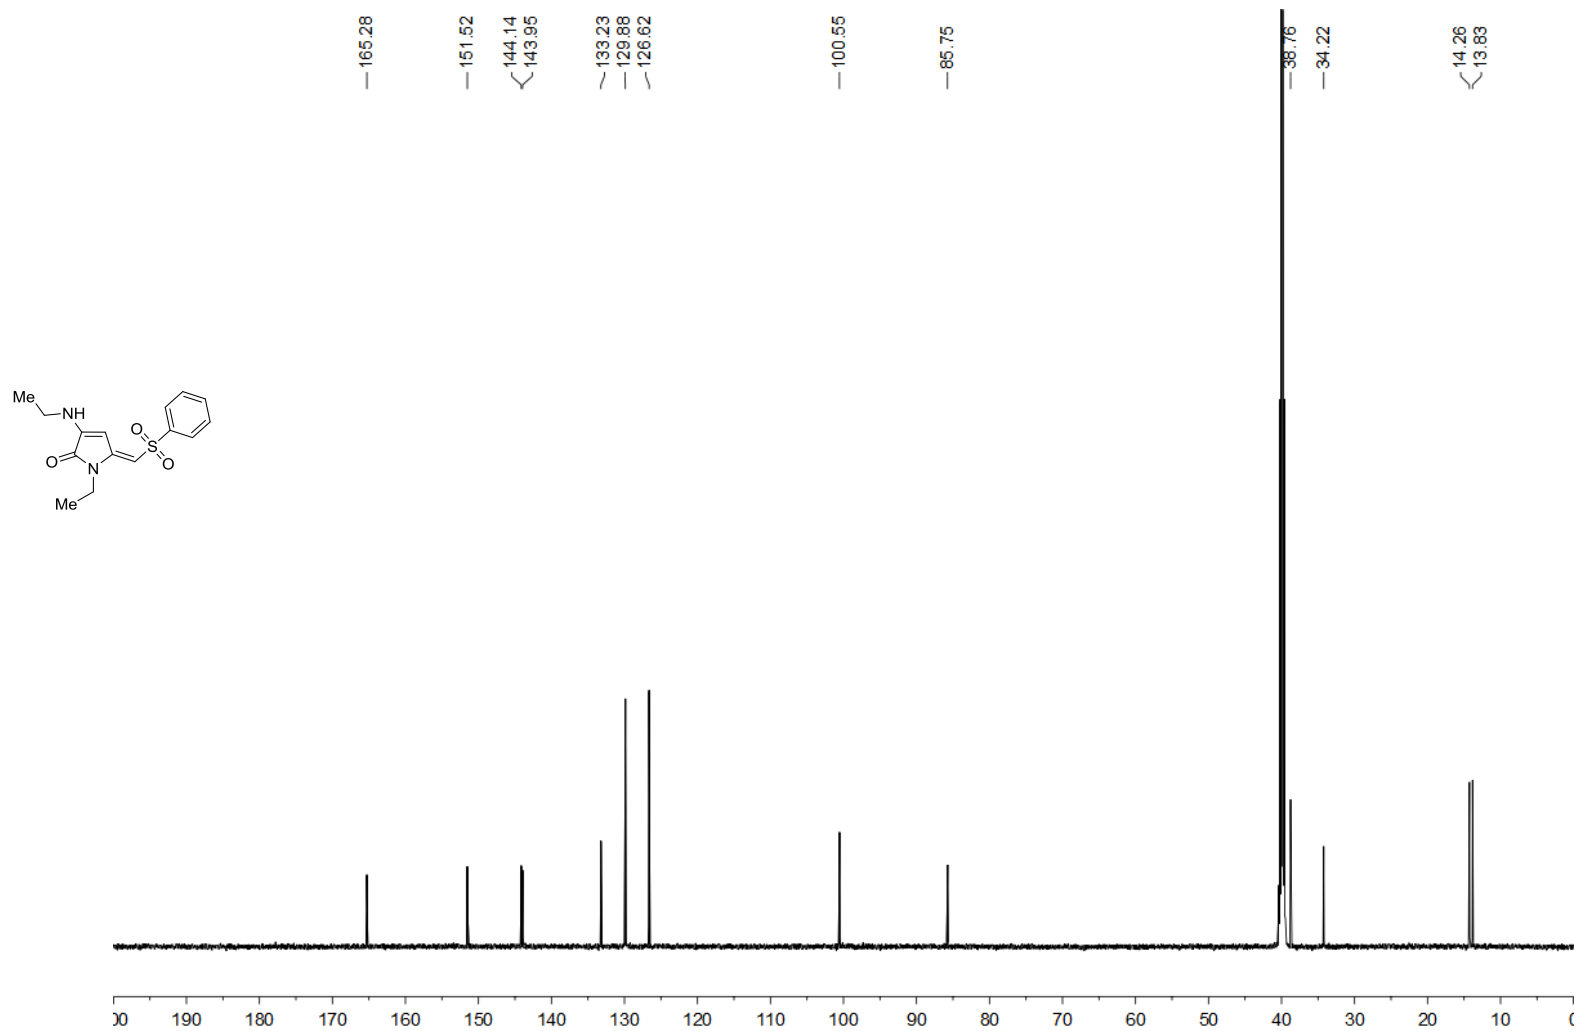

Figure S47.  $^{13}\text{C}$  NMR (150 MHz,  $\text{DMSO-}d_6$ ) spectra of compound **4u**

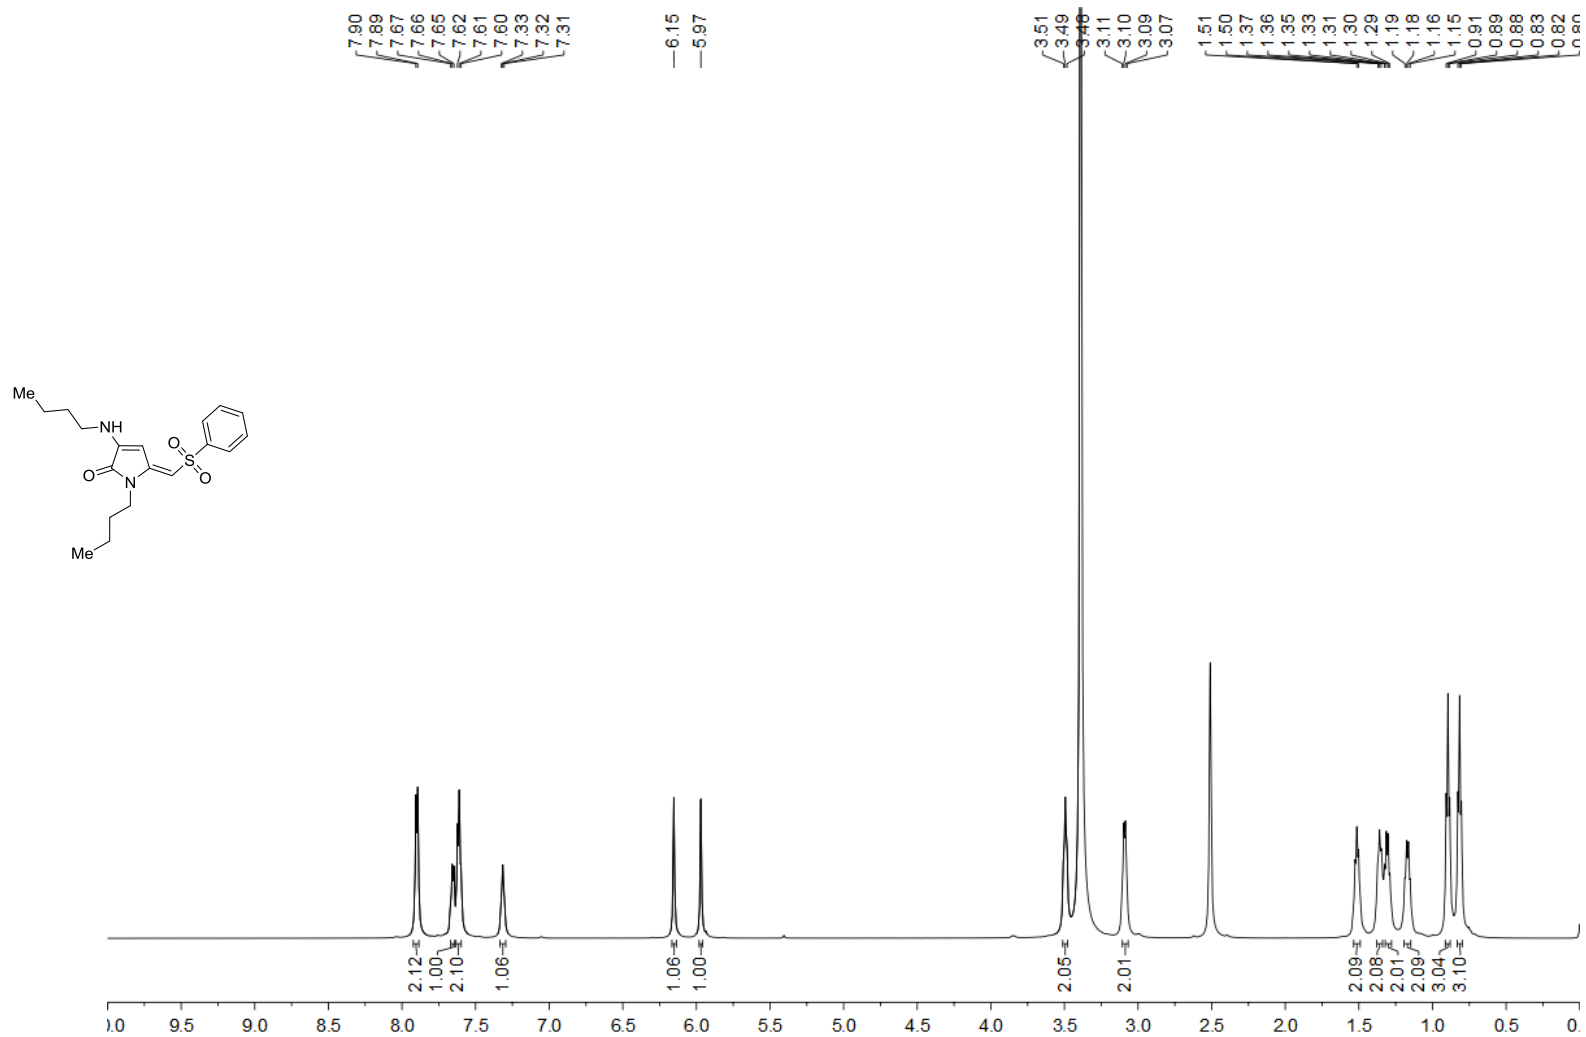

**Figure S48.** <sup>1</sup>H NMR (600 MHz, DMSO-*d*<sub>6</sub>) spectra of compound **4v**

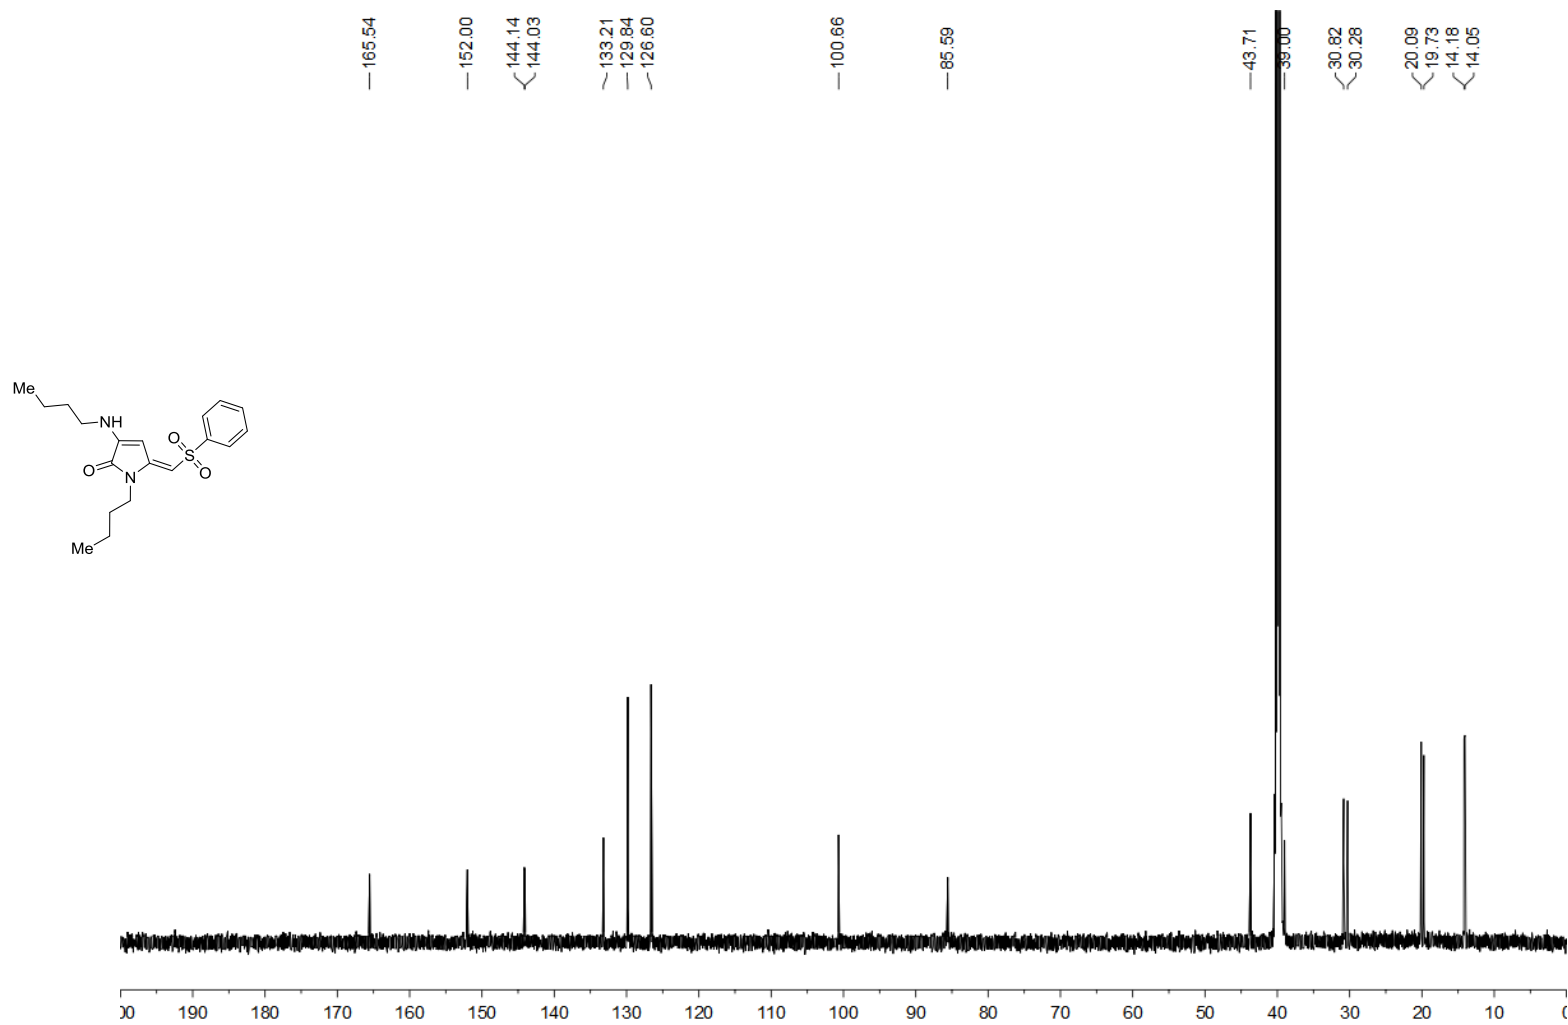

**Figure S49.**  $^{13}\text{C}$  NMR (150 MHz,  $\text{DMSO-}d_6$ ) spectra of compound **4v**

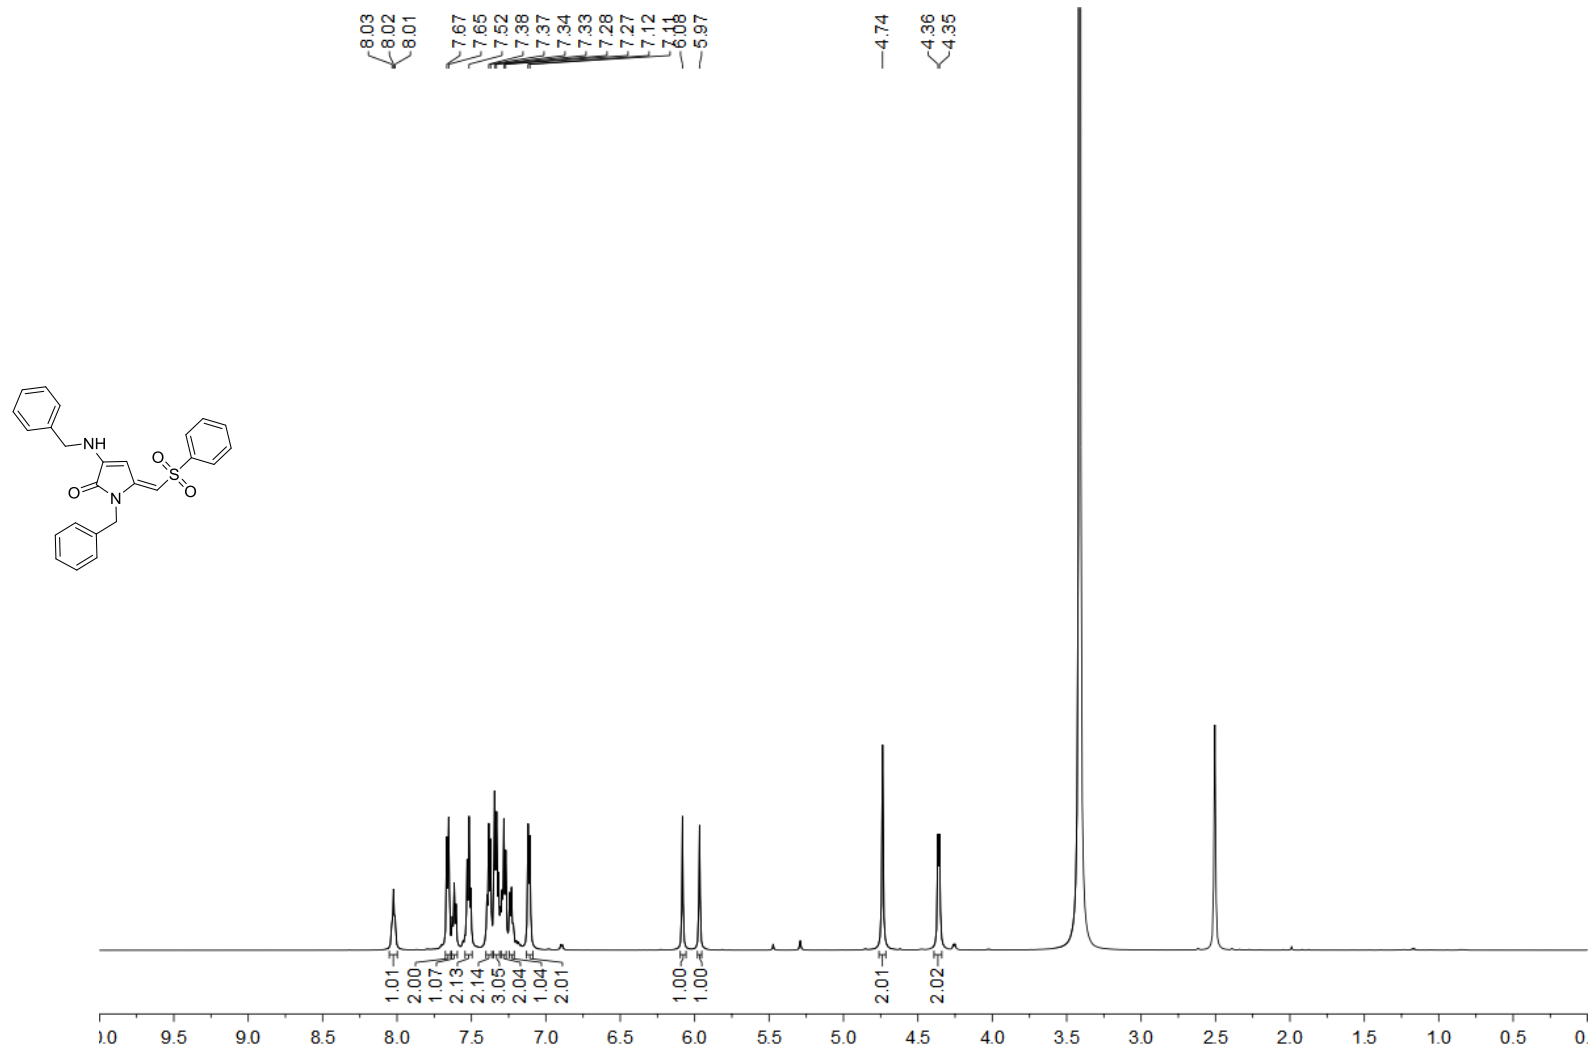

Figure S50. <sup>1</sup>H NMR (600 MHz, DMSO-*d*<sub>6</sub>) spectra of compound **4w**

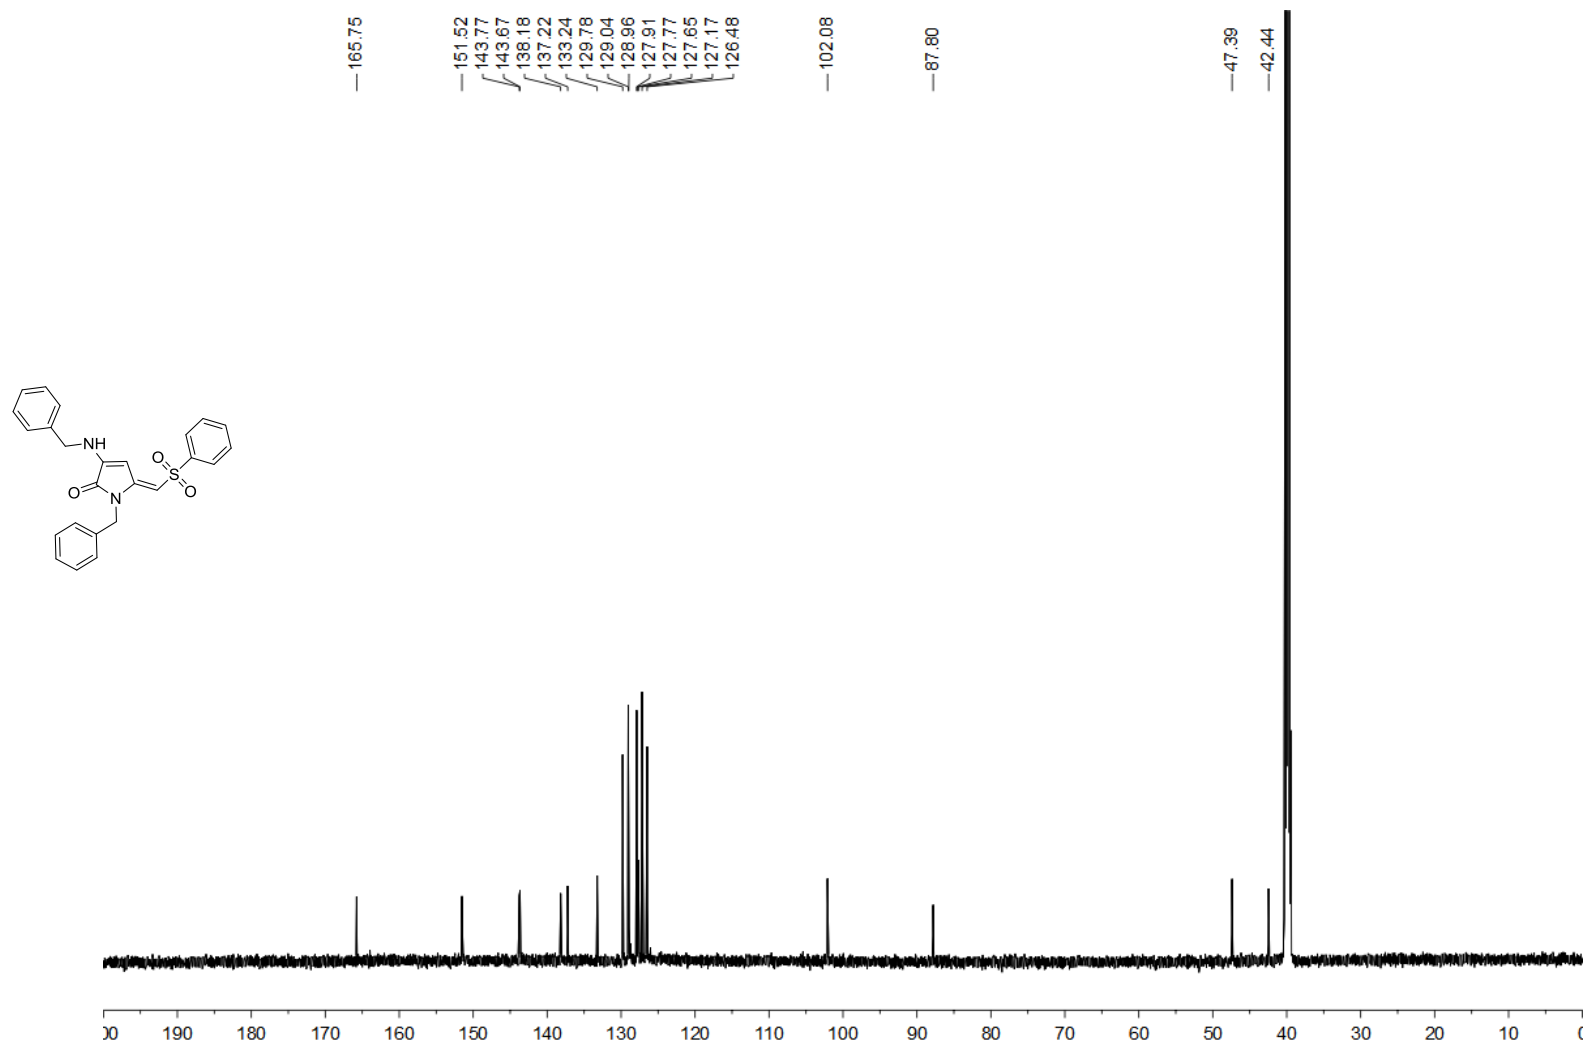

Figure S51.  $^{13}\text{C}$  NMR (150 MHz,  $\text{DMSO-}d_6$ ) spectra of compound 4w

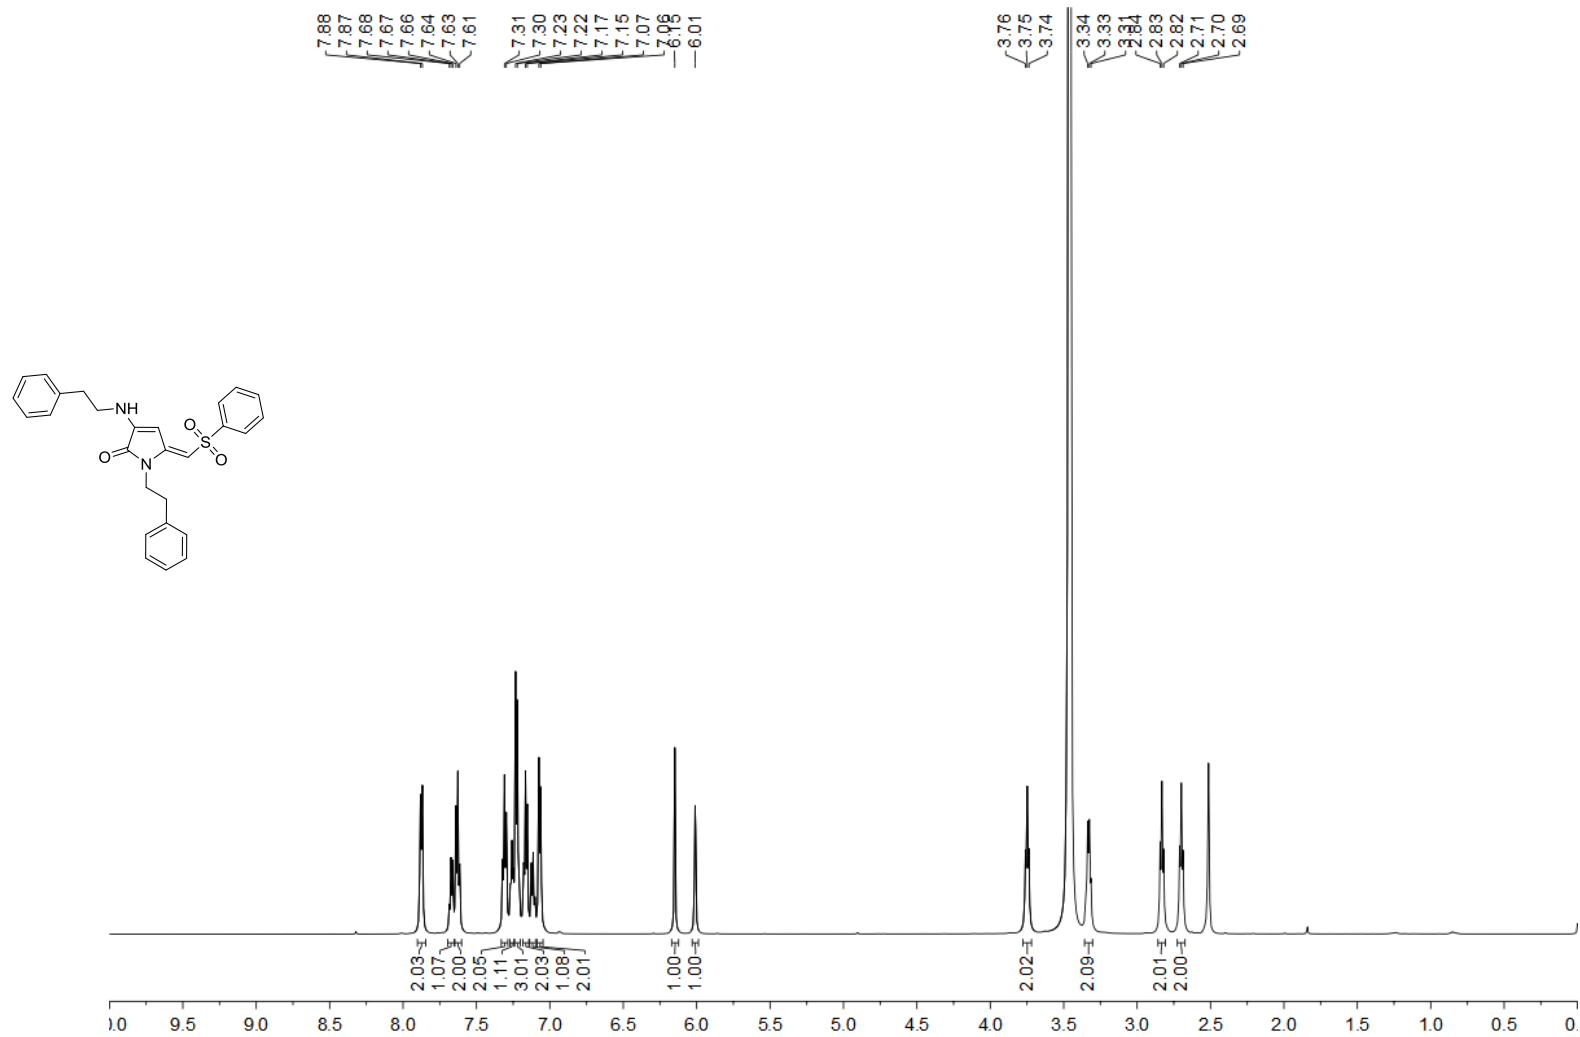

Figure S52. <sup>1</sup>H NMR (600 MHz, DMSO-*d*<sub>6</sub>) spectra of compound **4x**



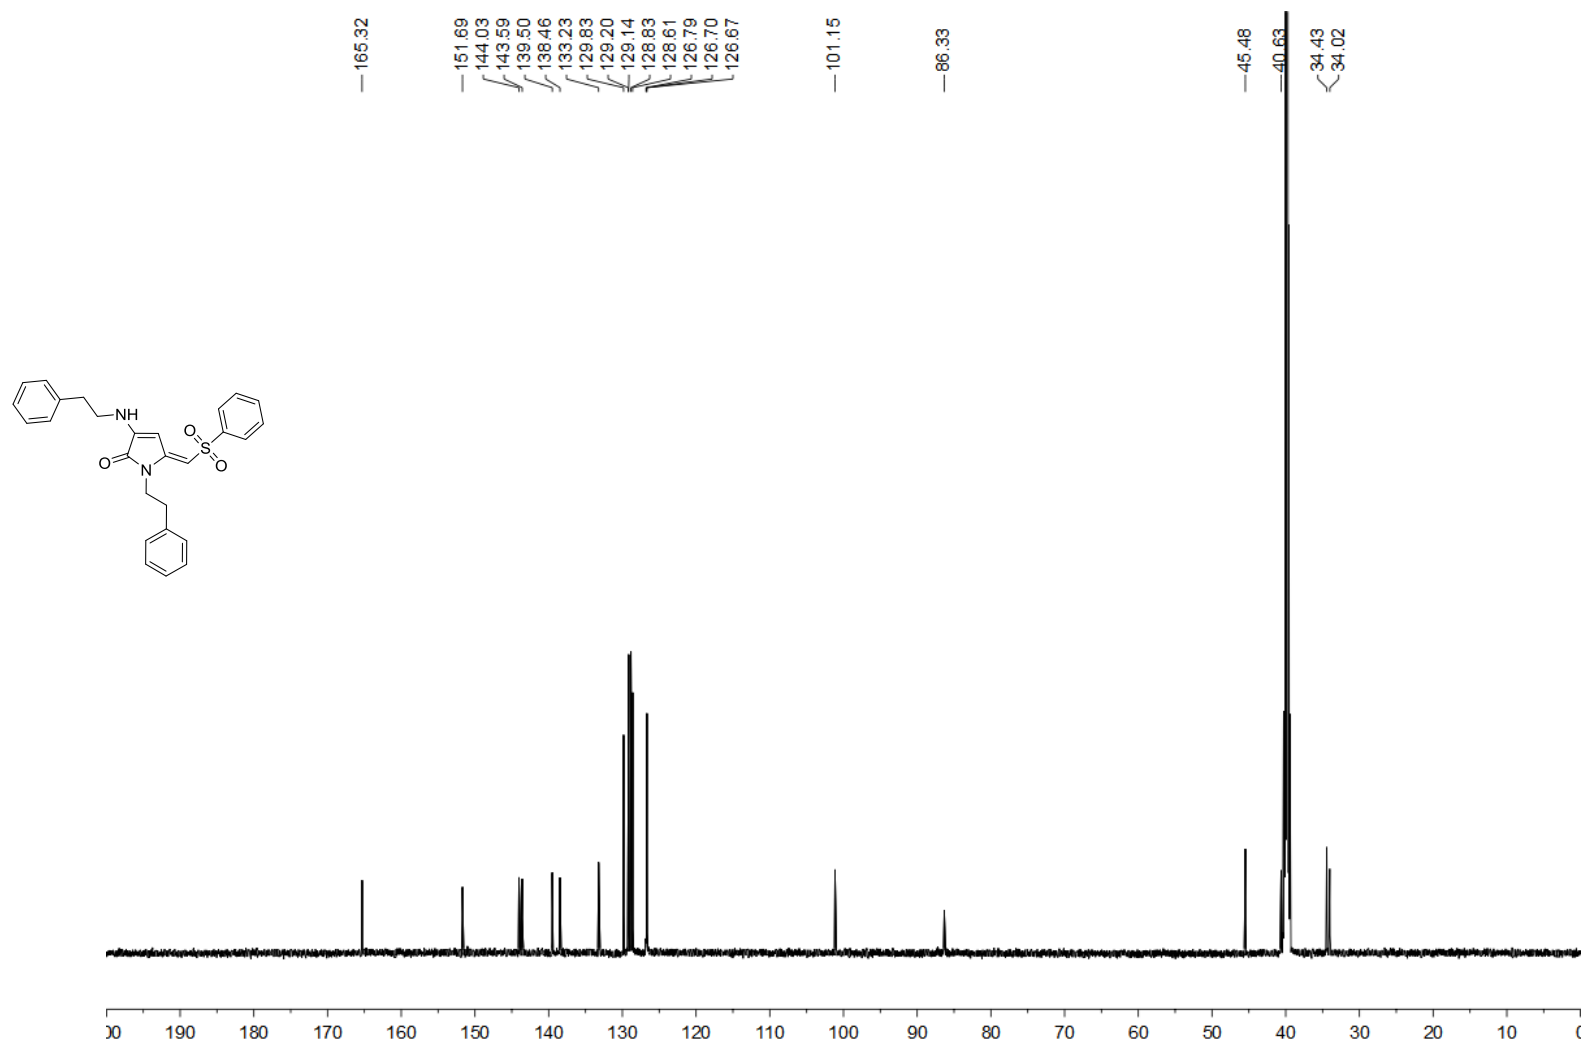

Figure S53. <sup>13</sup>C NMR (150 MHz, DMSO-*d*<sub>6</sub>) spectra of compound **4x**

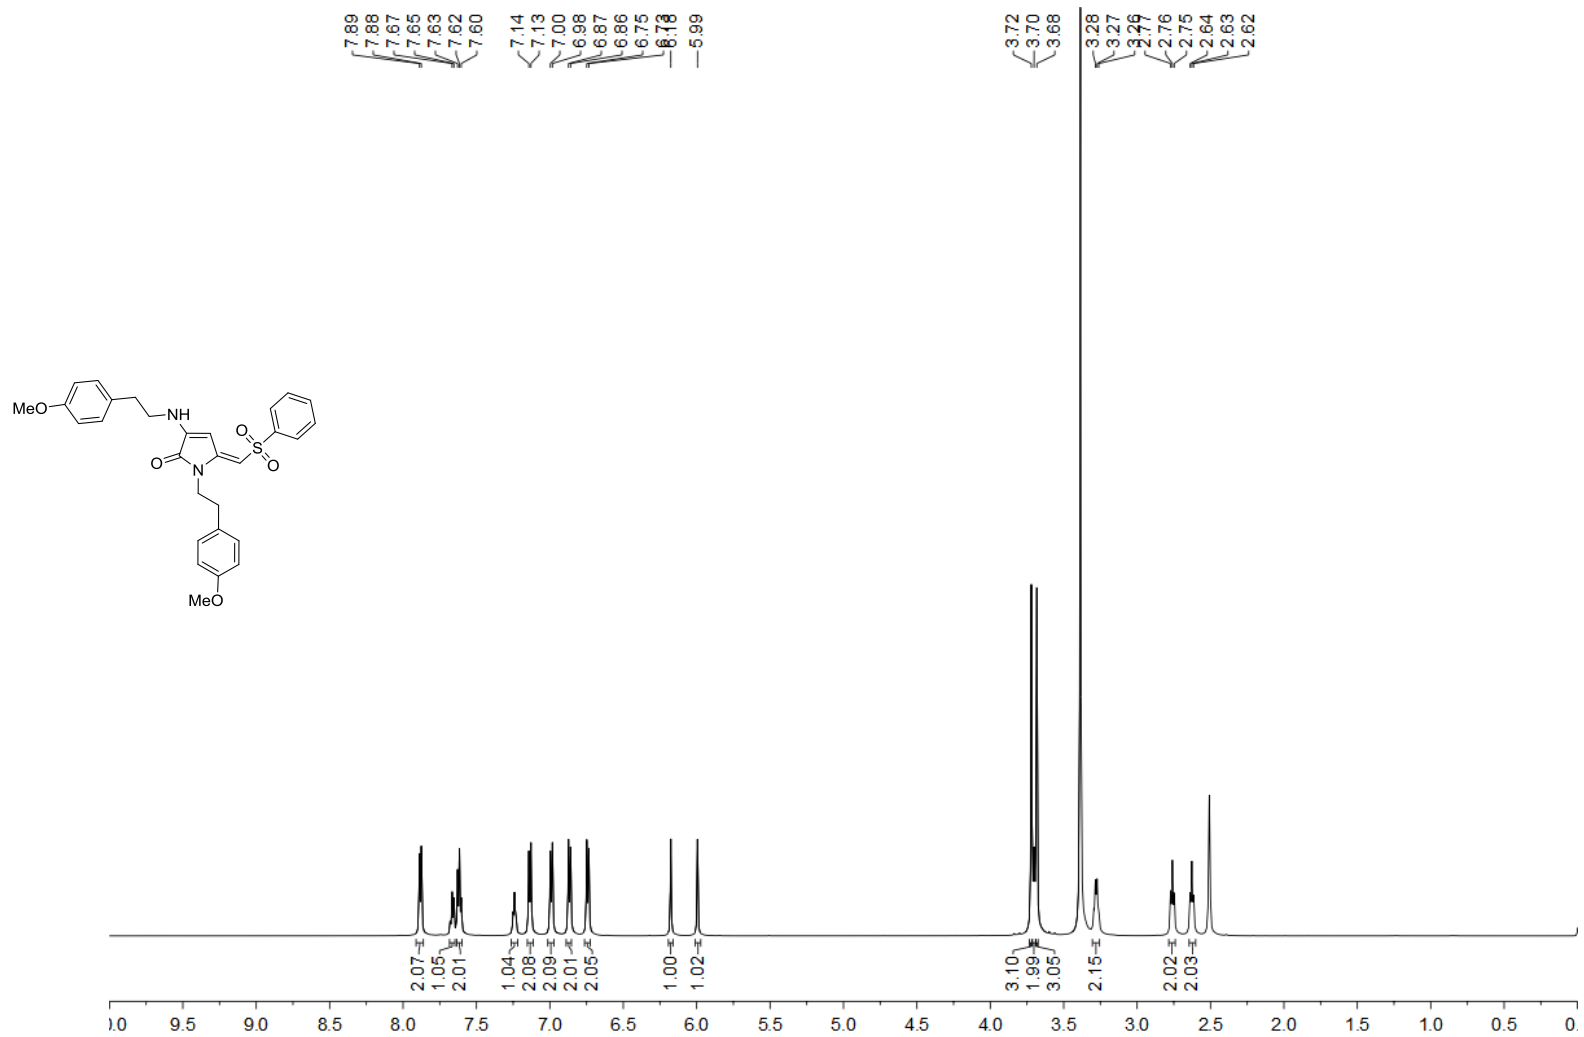

Figure S54. <sup>1</sup>H NMR (600 MHz, DMSO-*d*<sub>6</sub>) spectra of compound **4y**

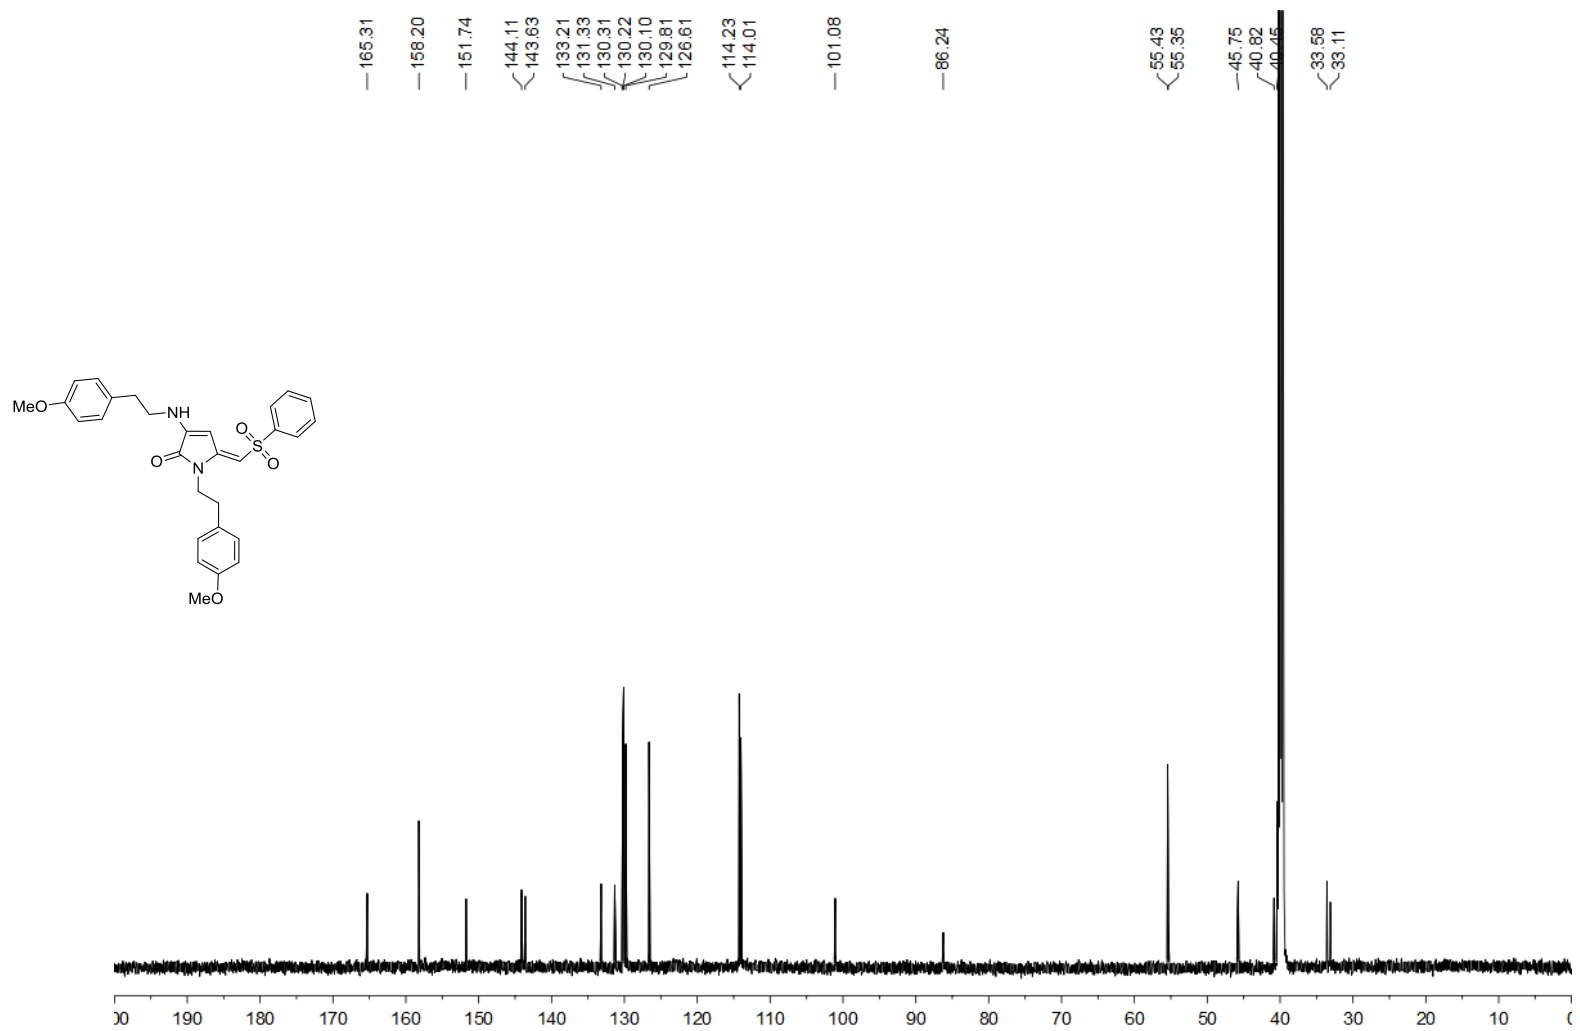

Figure S55.  $^{13}\text{C}$  NMR (150 MHz,  $\text{DMSO-}d_6$ ) spectra of compound **4y**

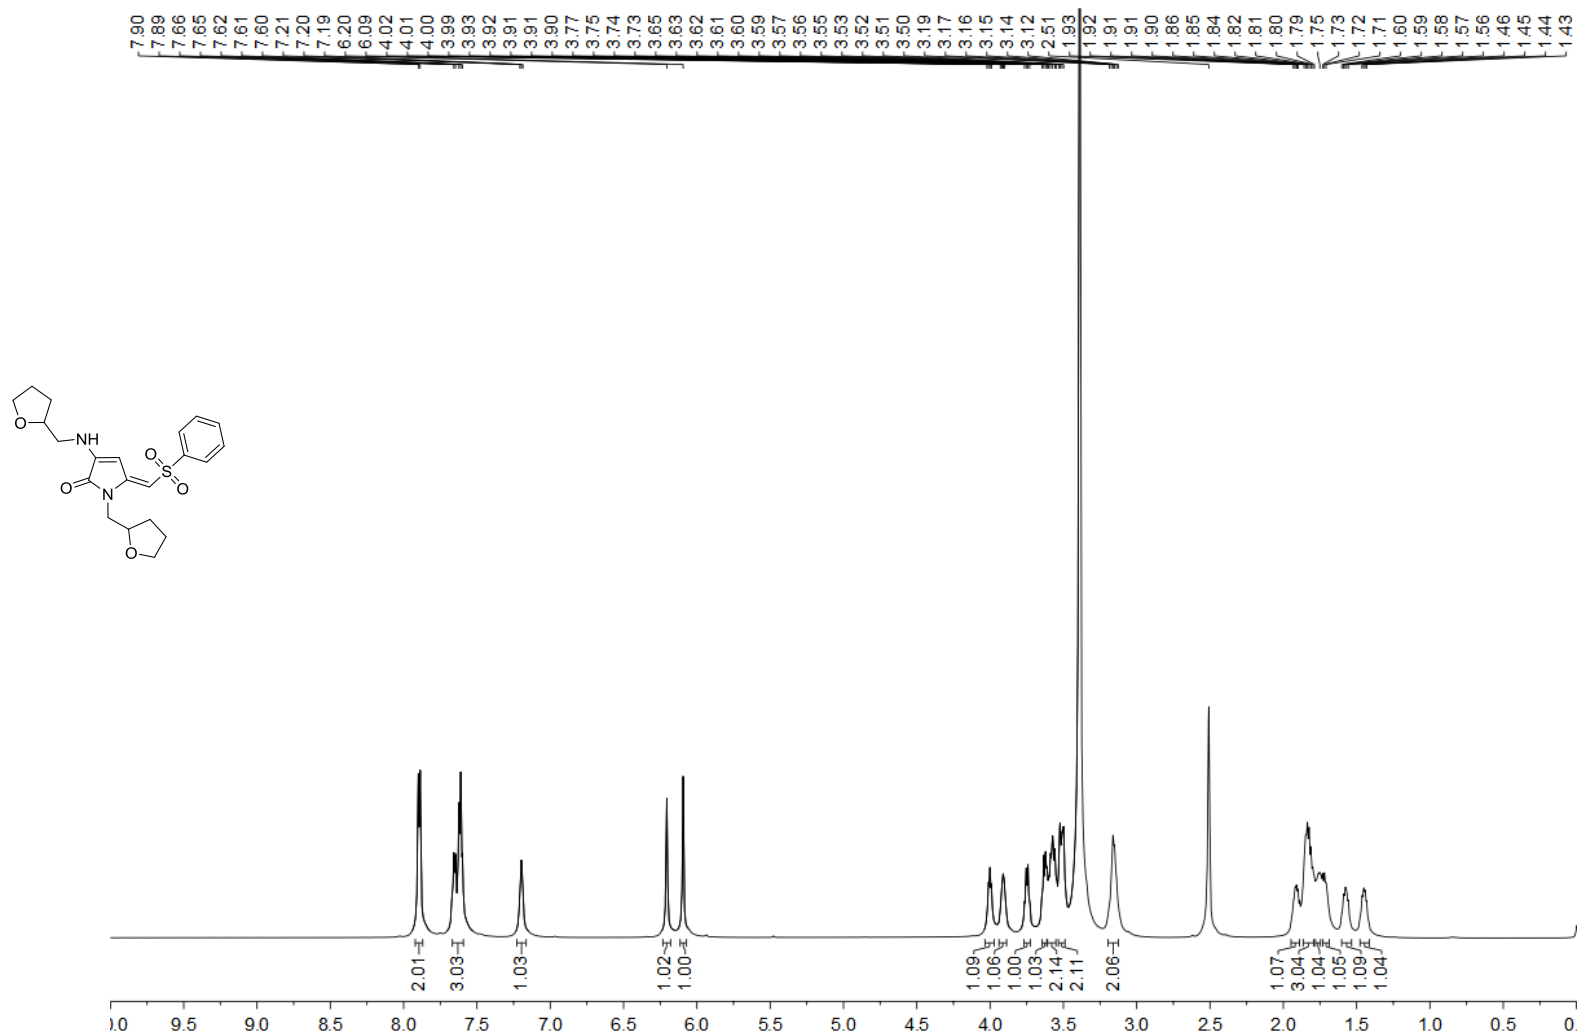

Figure S56. <sup>1</sup>H NMR (600 MHz, DMSO-*d*<sub>6</sub>) spectra of compound **4z**

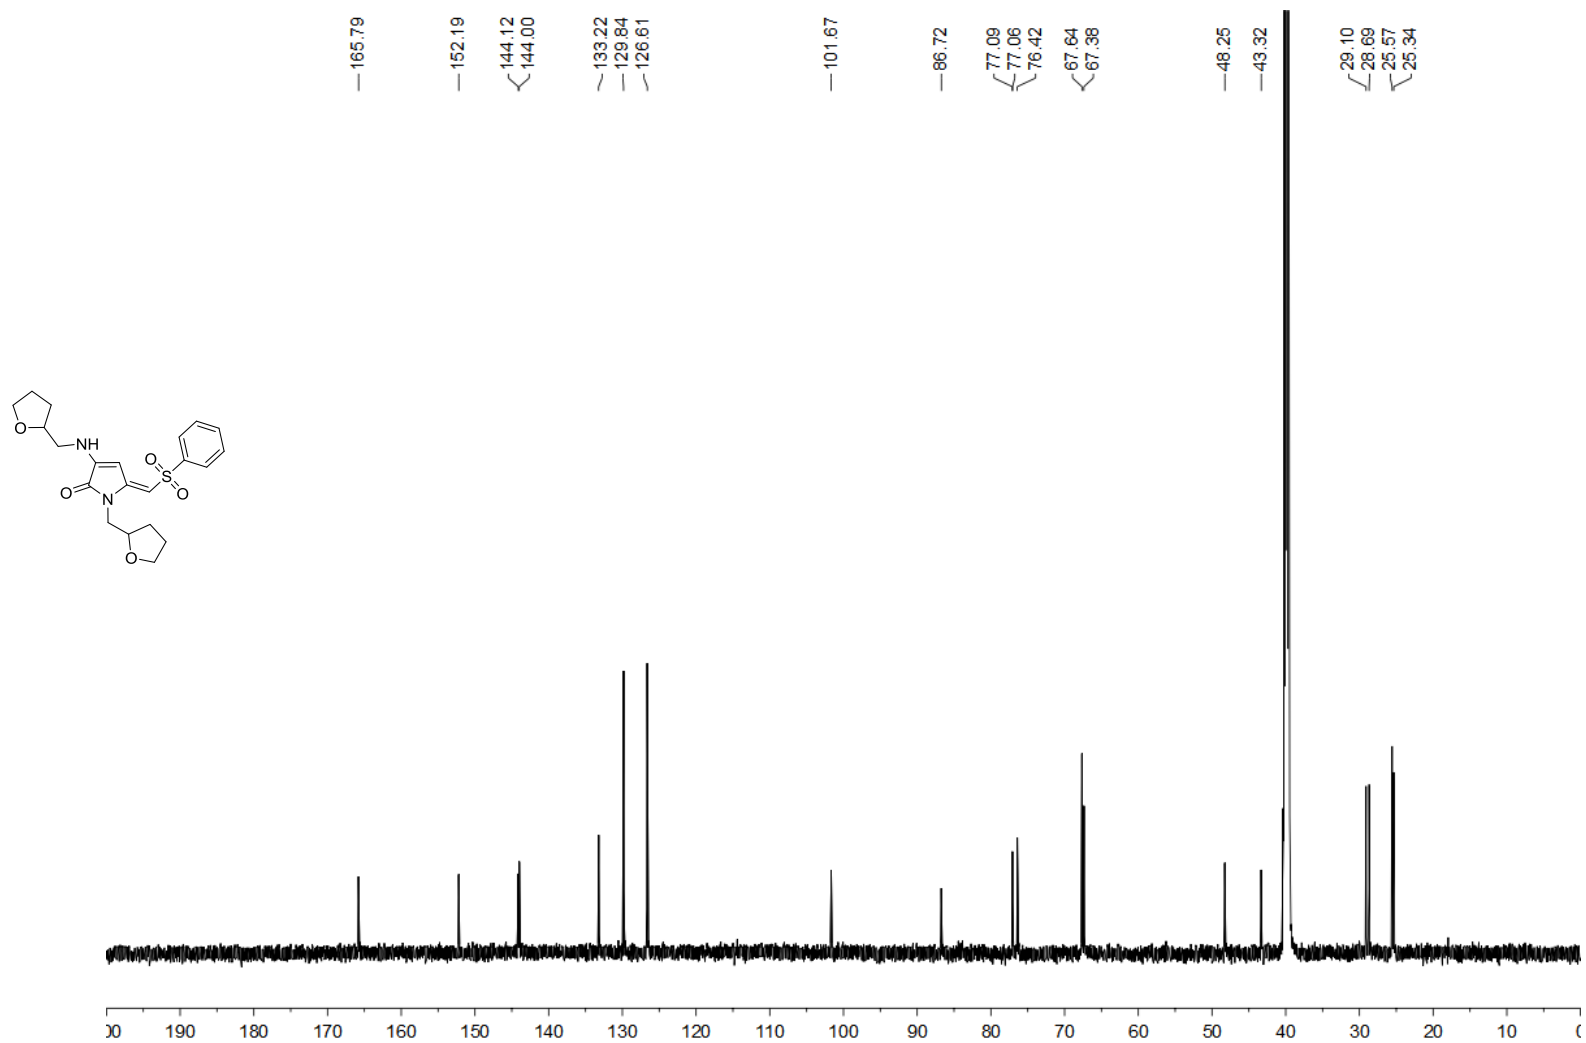

**Figure S57.**  $^{13}\text{C}$  NMR (150 MHz,  $\text{DMSO-}d_6$ ) spectra of compound **4z**

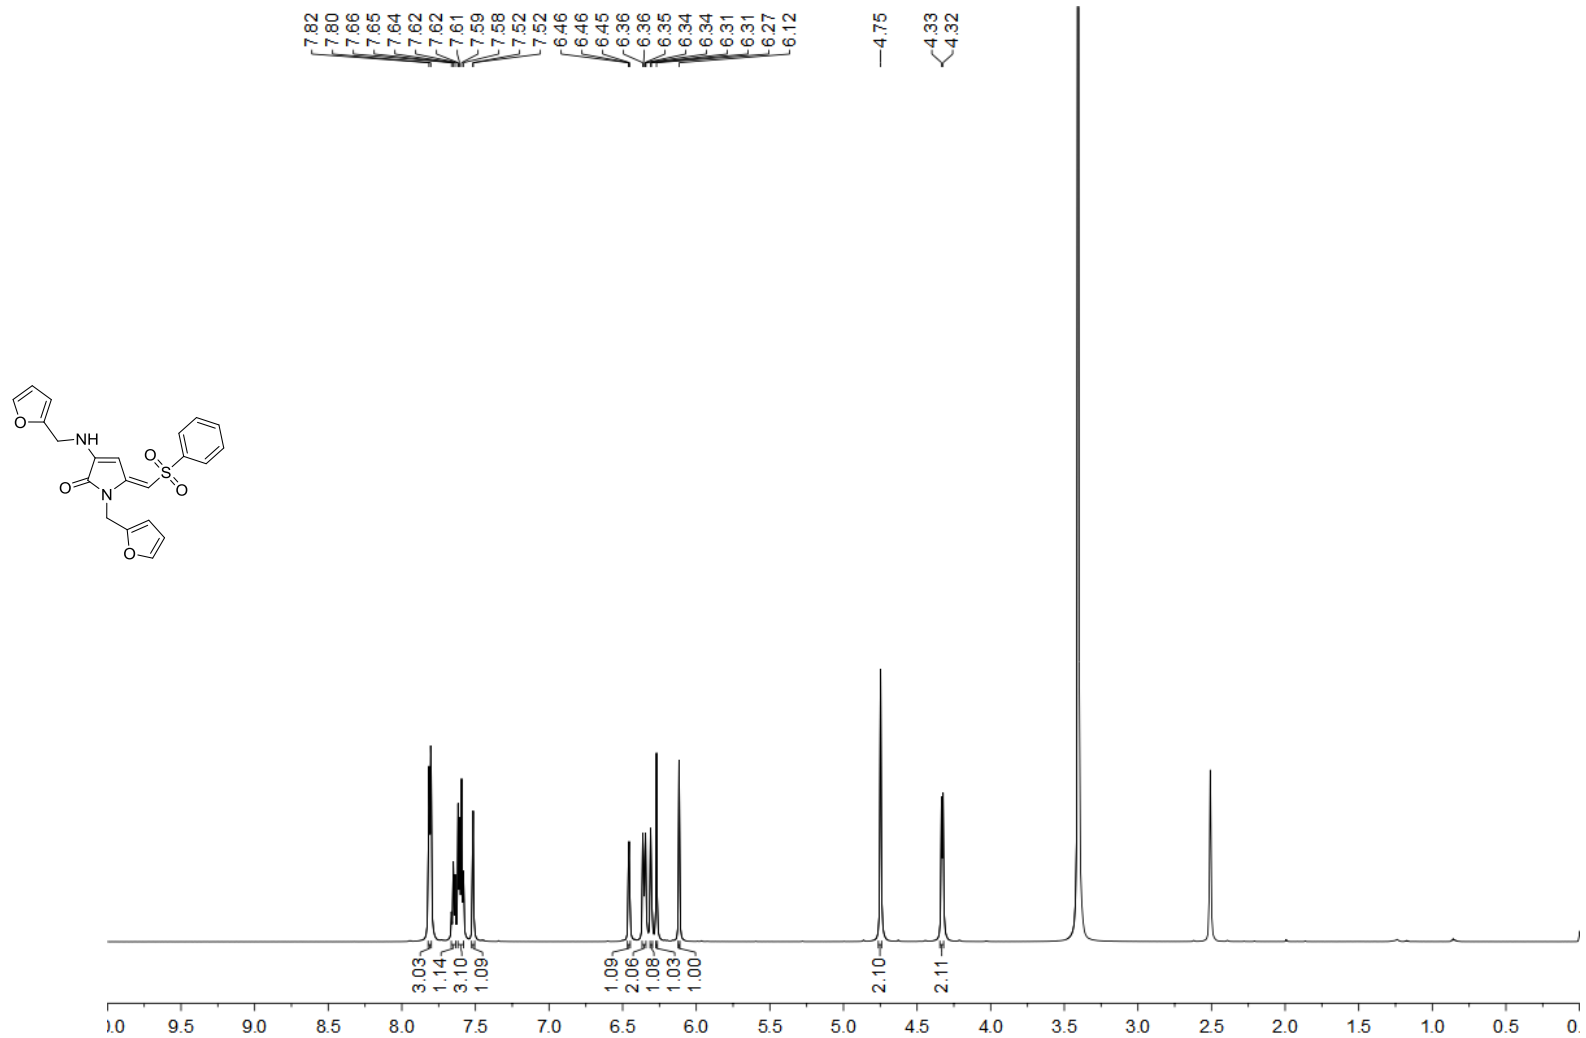

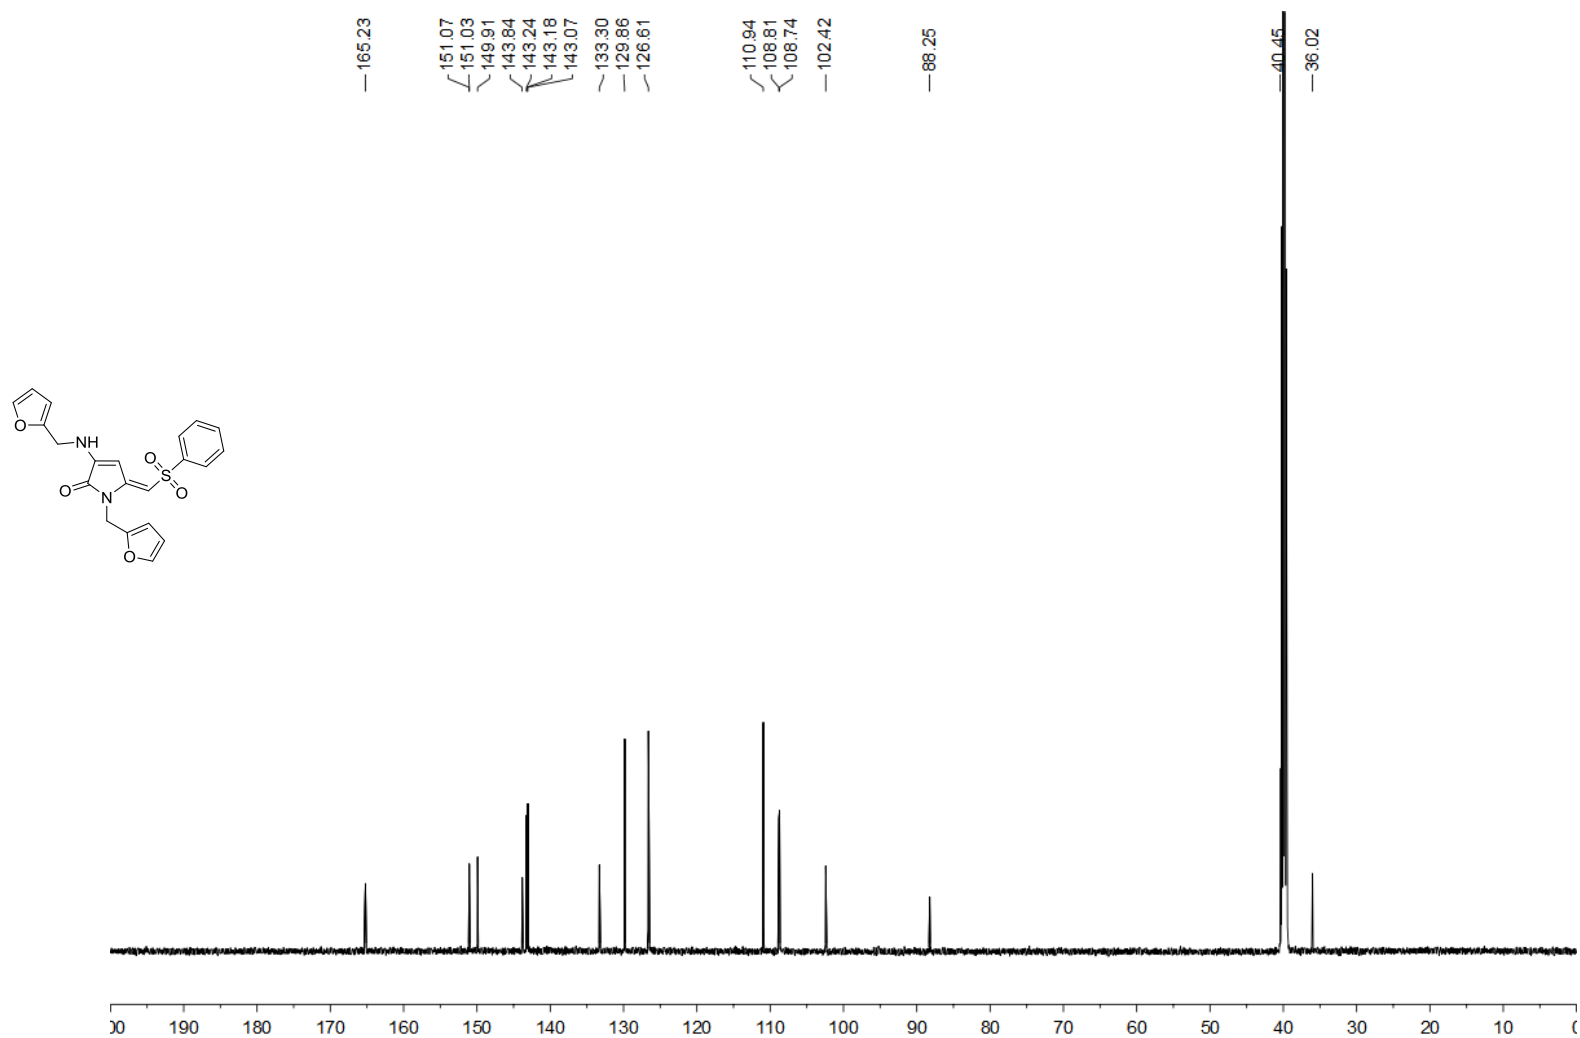

Figure S59. <sup>13</sup>C NMR (150 MHz, DMSO-*d*<sub>6</sub>) spectra of compound 4a'

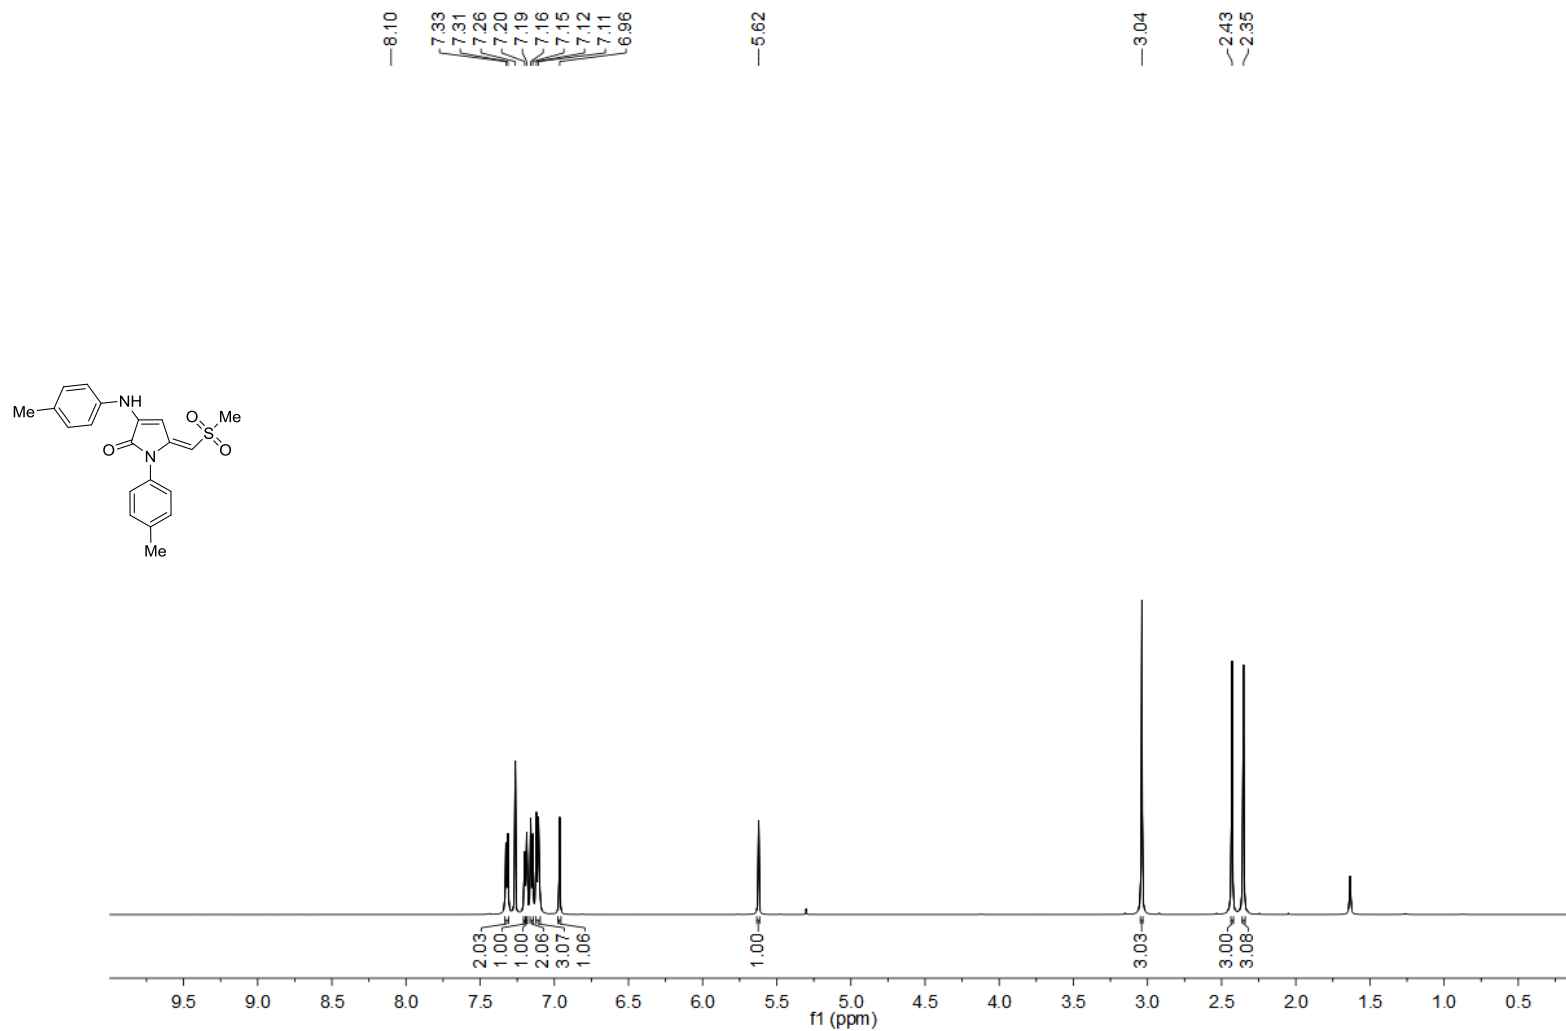

**Figure S60.** <sup>1</sup>H NMR (600 MHz, CDCl<sub>3</sub>) spectra of compound **5a**



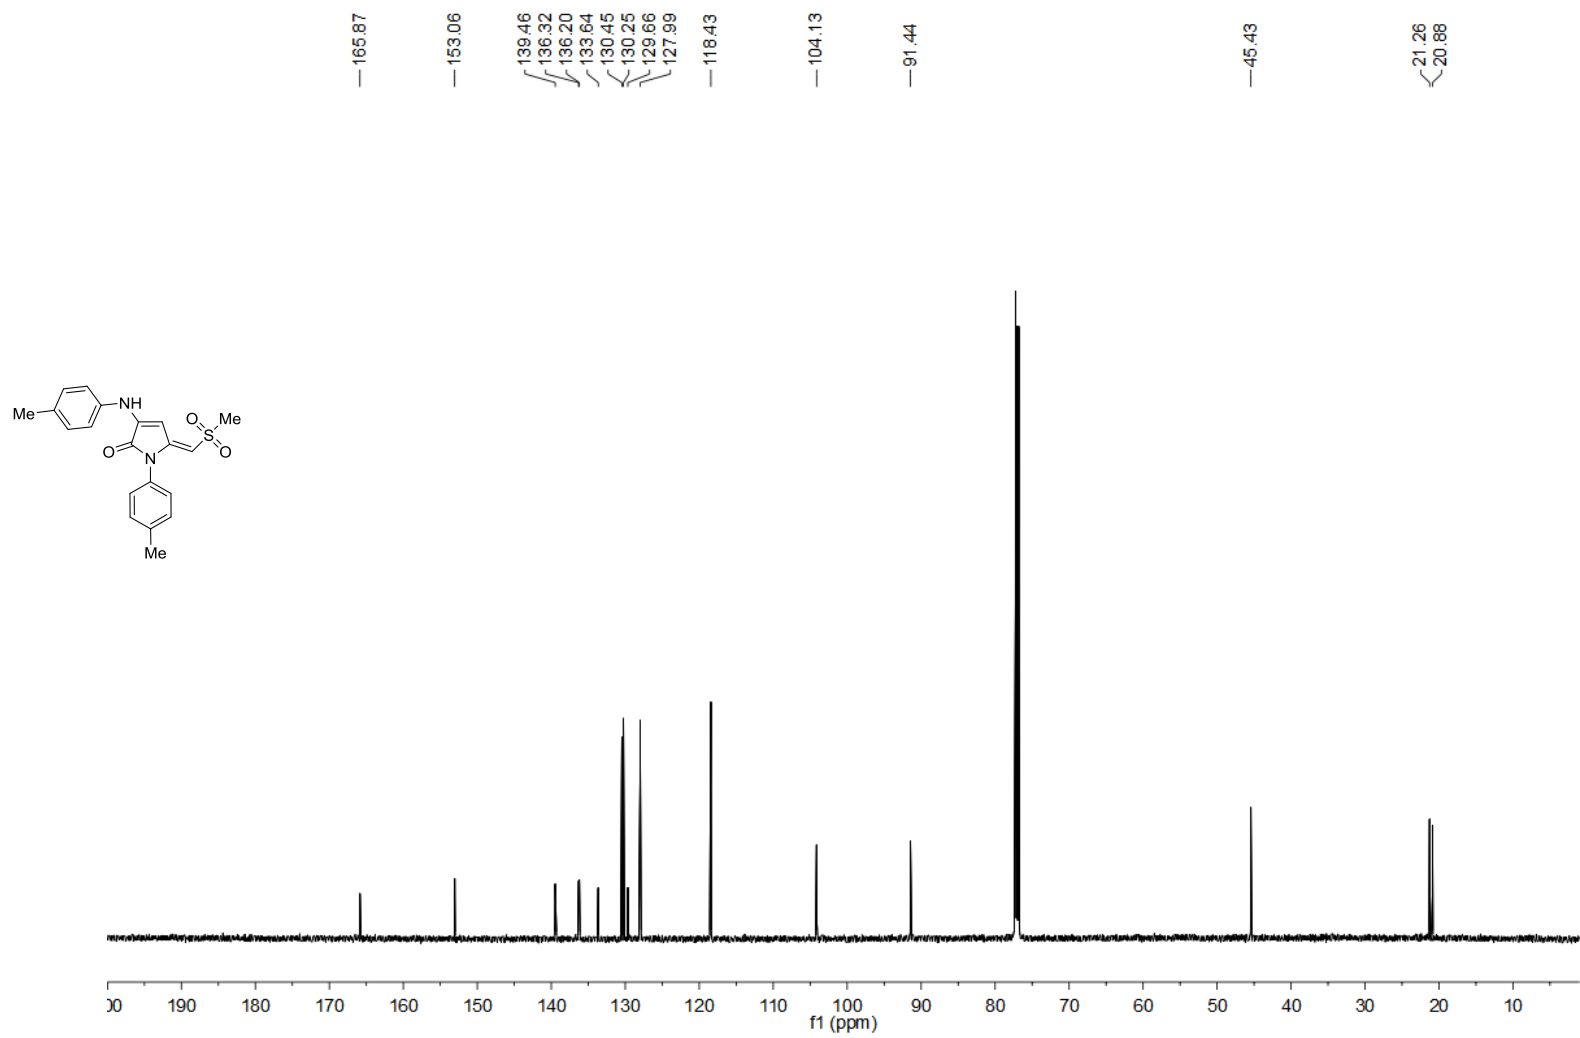

Figure S61. <sup>13</sup>C NMR (150 MHz, CDCl<sub>3</sub>) spectra of compound 5a

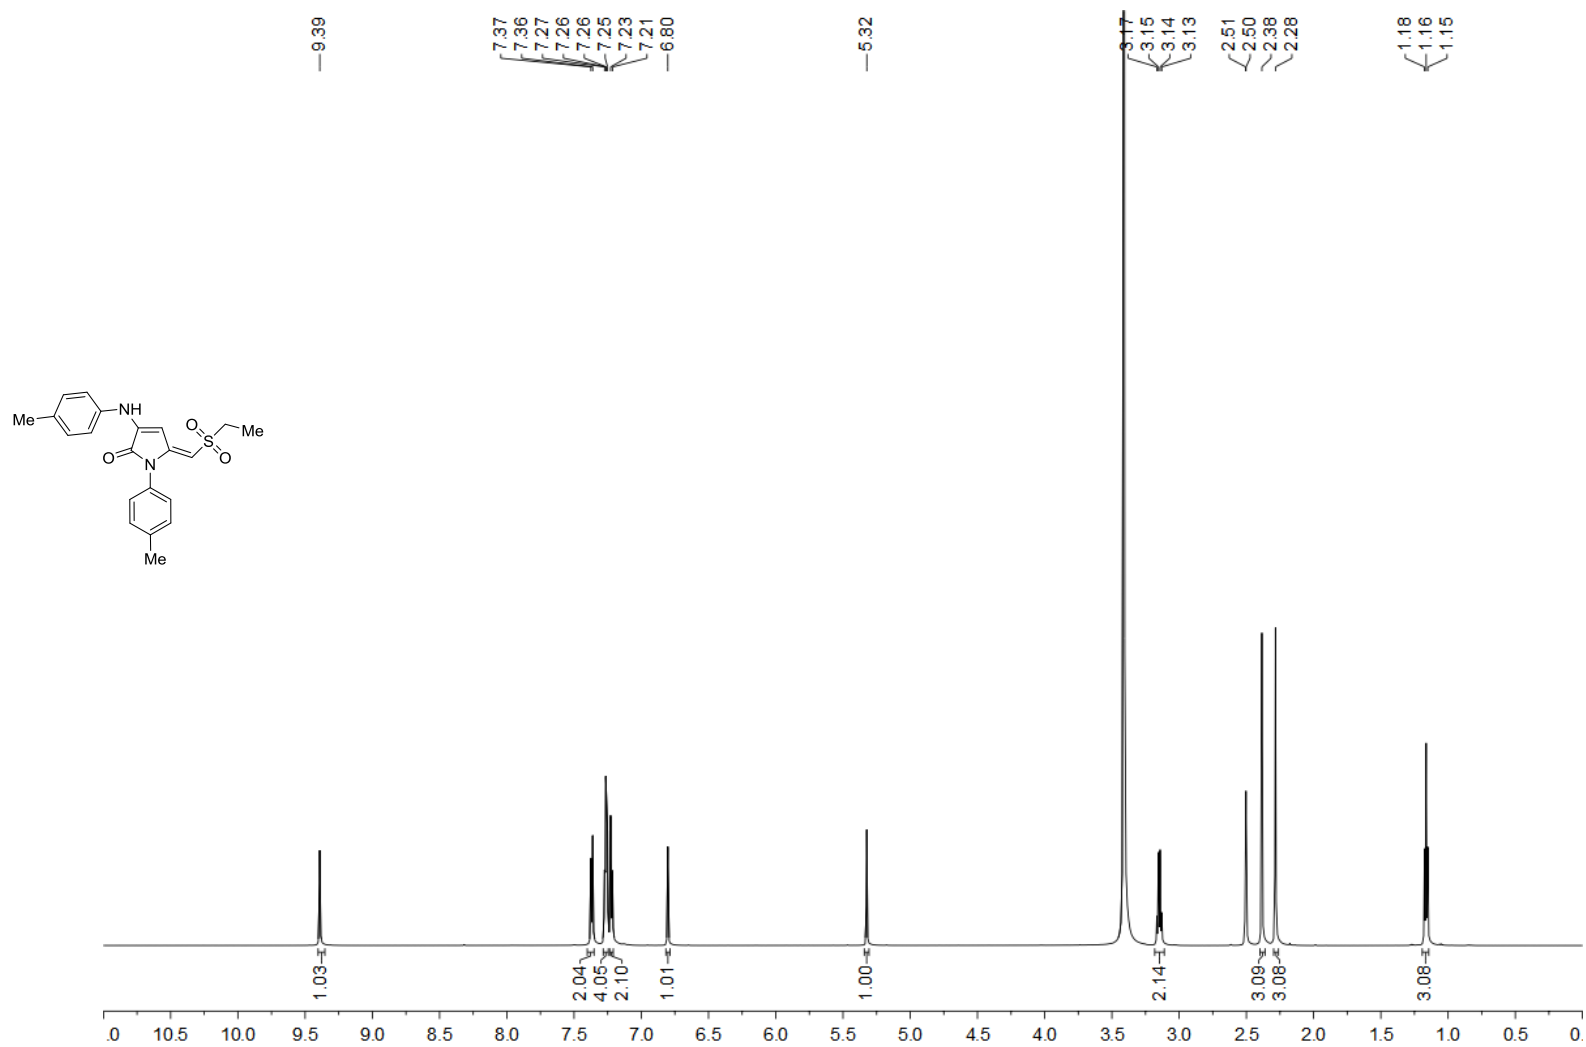

**Figure S62.** <sup>1</sup>H NMR (600 MHz, DMSO-*d*<sub>6</sub>) spectra of compound **5b**

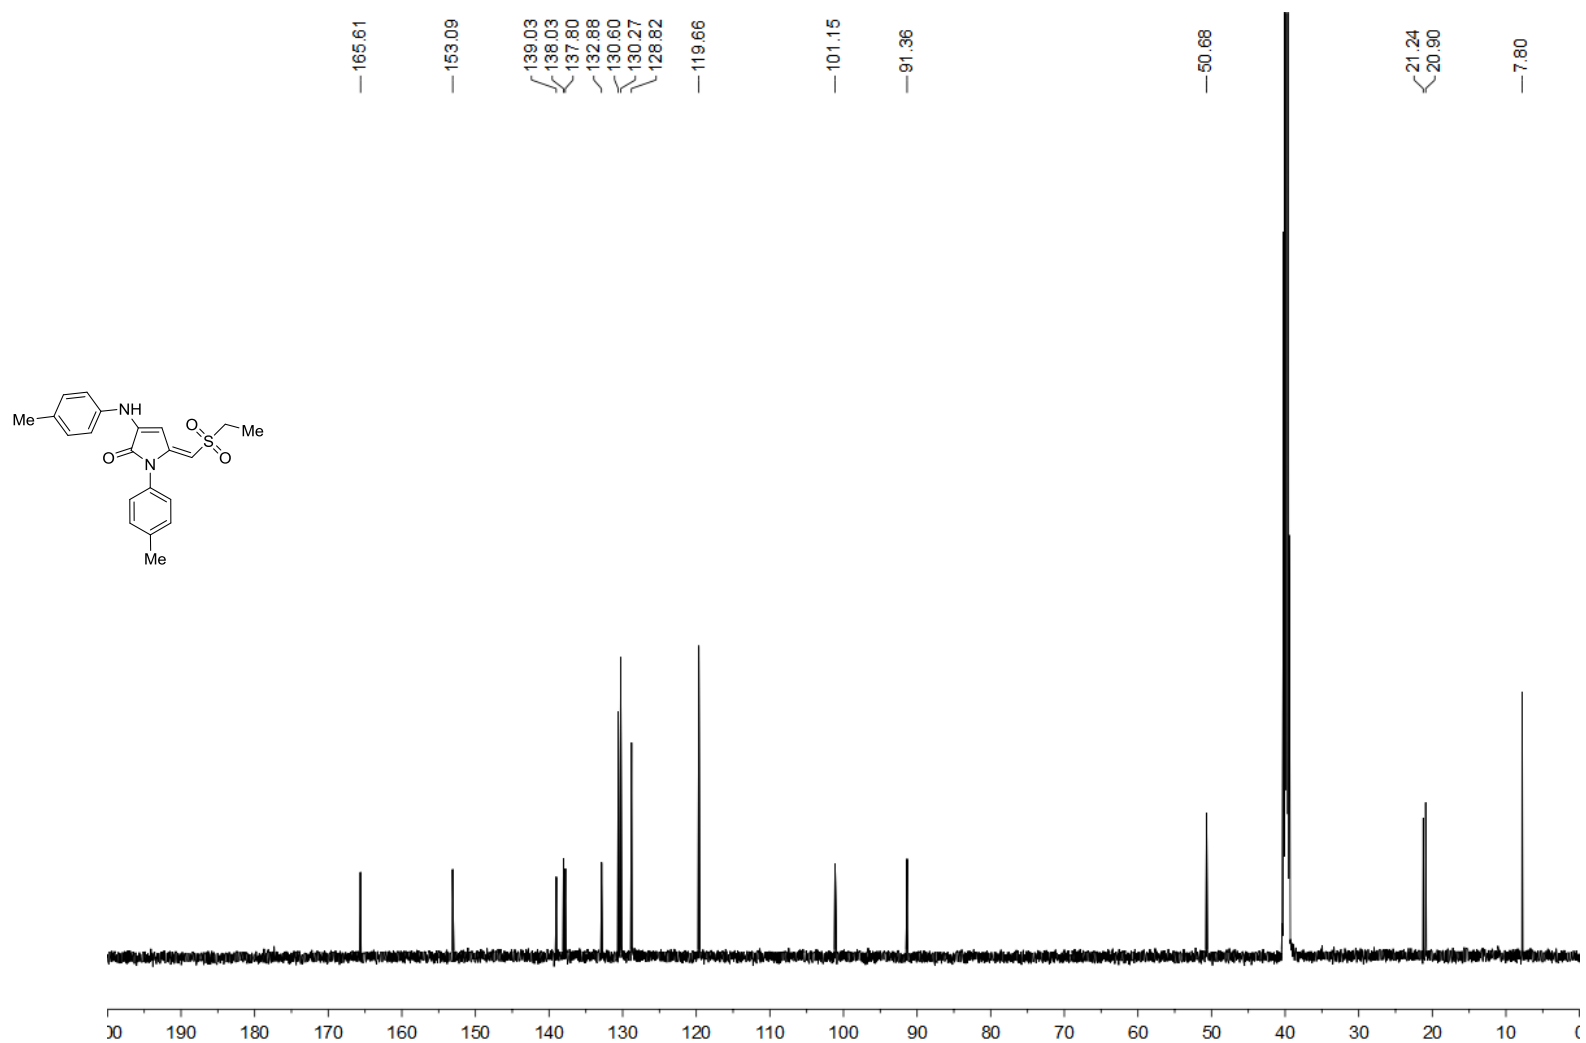

**Figure S63.** <sup>13</sup>C NMR (150 MHz, DMSO-*d*<sub>6</sub>) spectra of compound **5b**

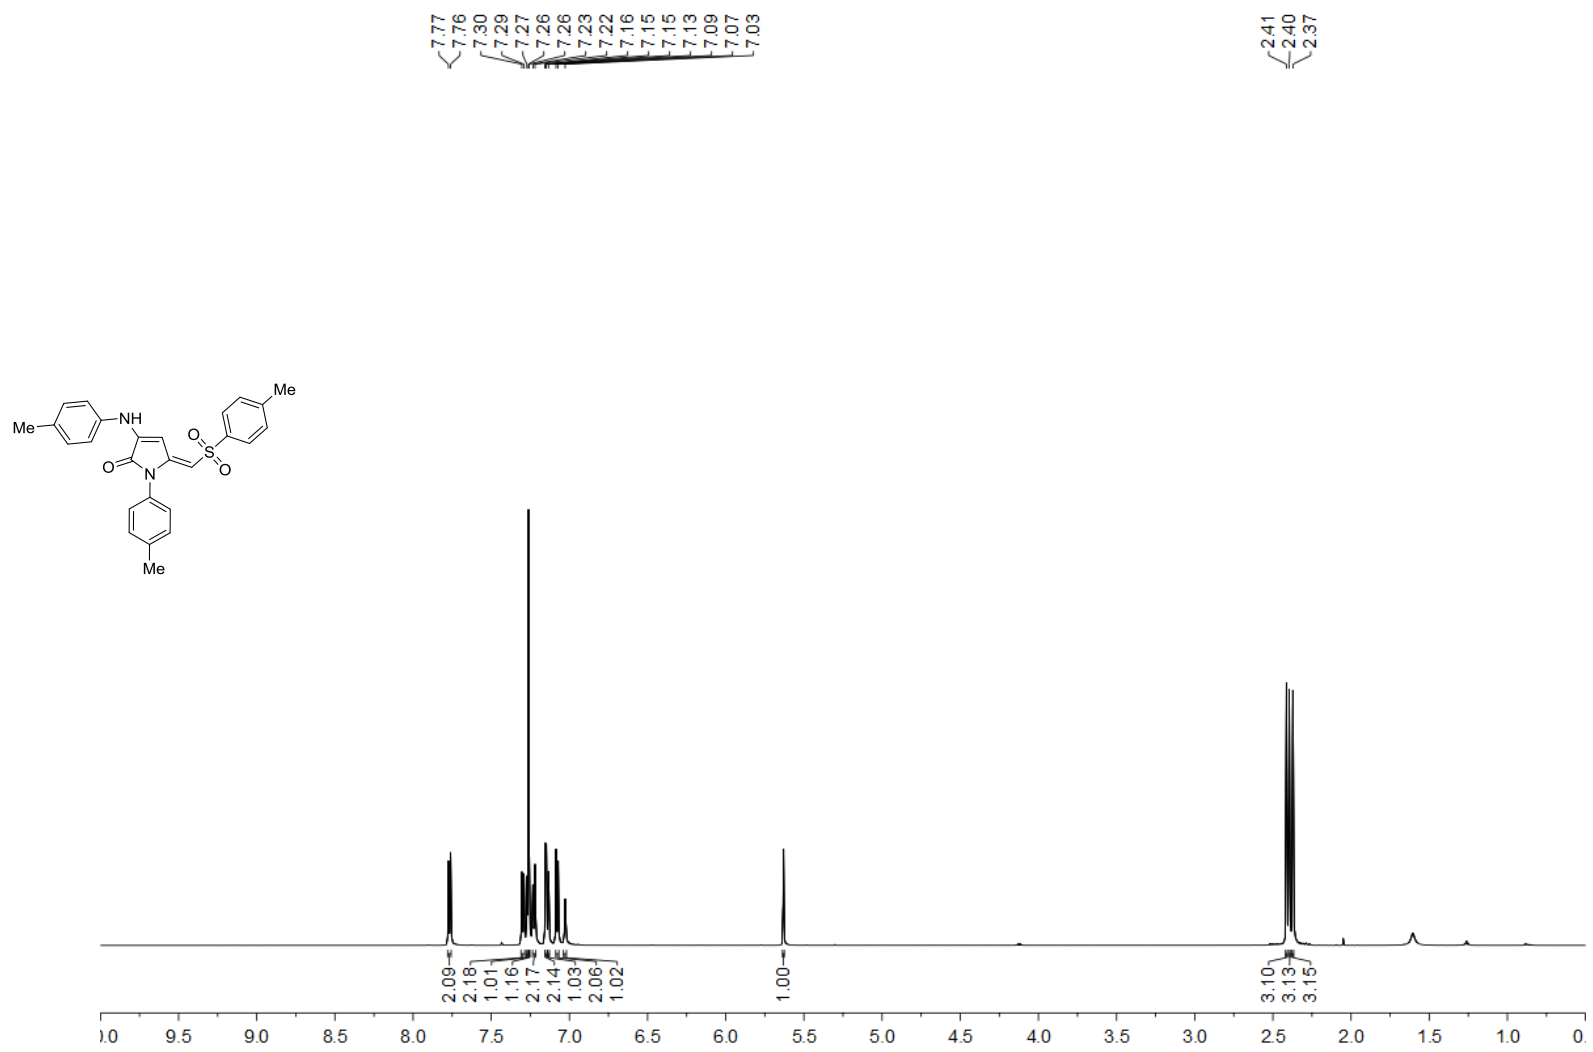

Figure S64. <sup>1</sup>H NMR (600 MHz, CDCl<sub>3</sub>) spectra of compound **5c**

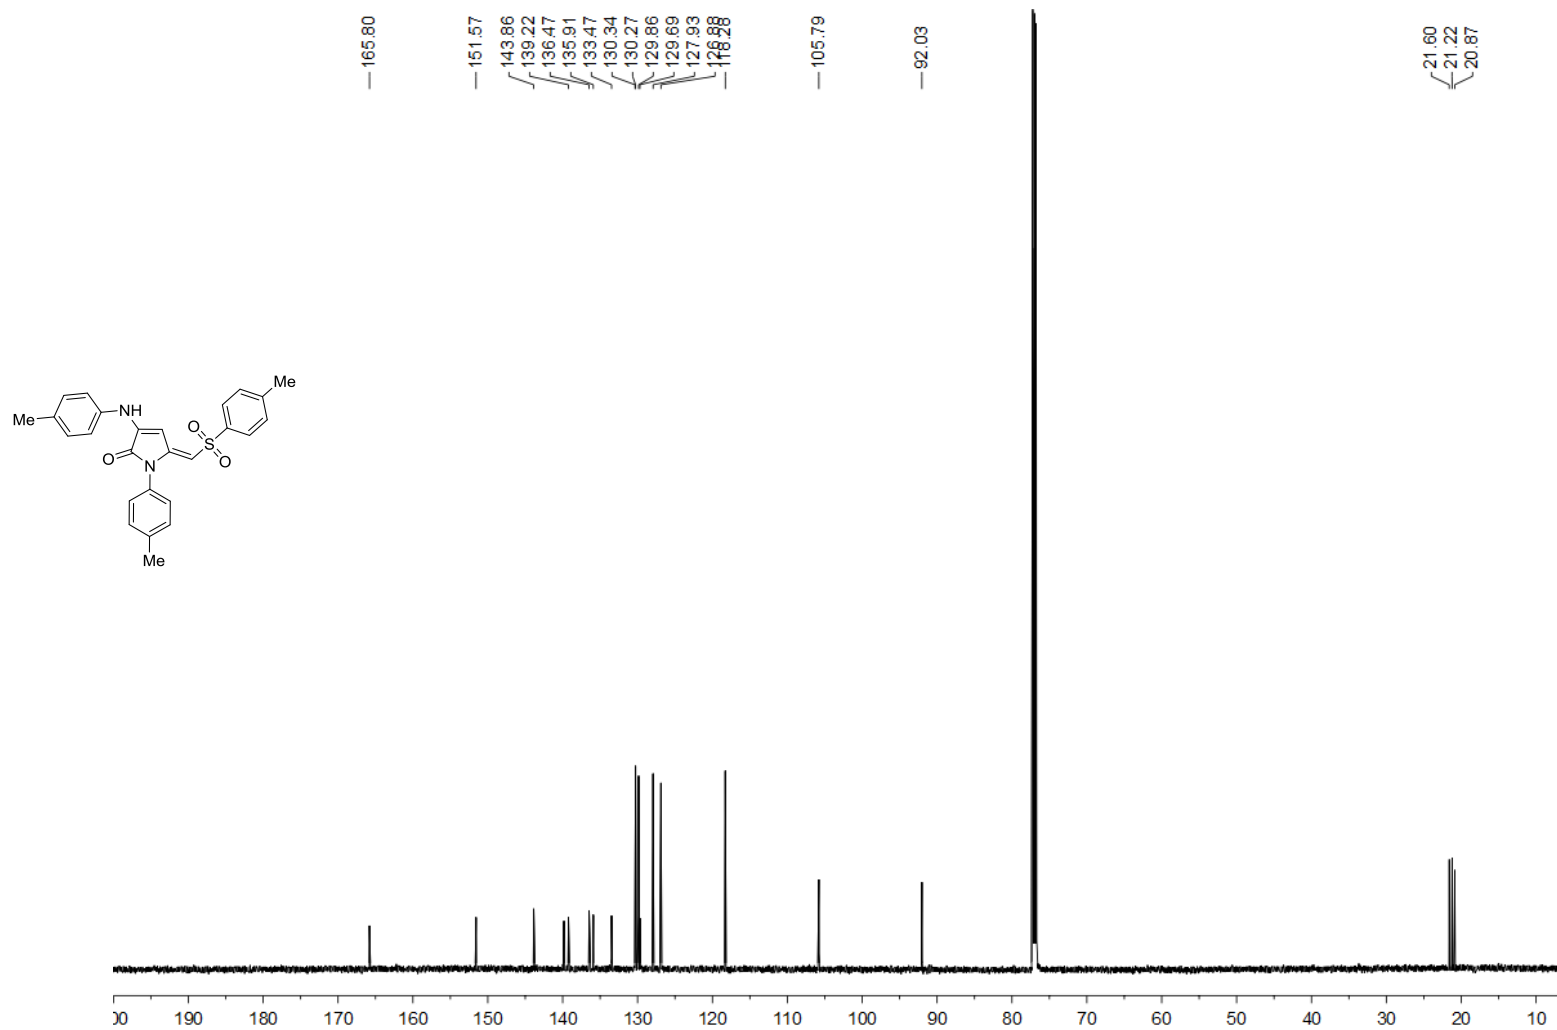

Figure S65. <sup>13</sup>C NMR (150 MHz, CDCl<sub>3</sub>) spectra of compound **5c**

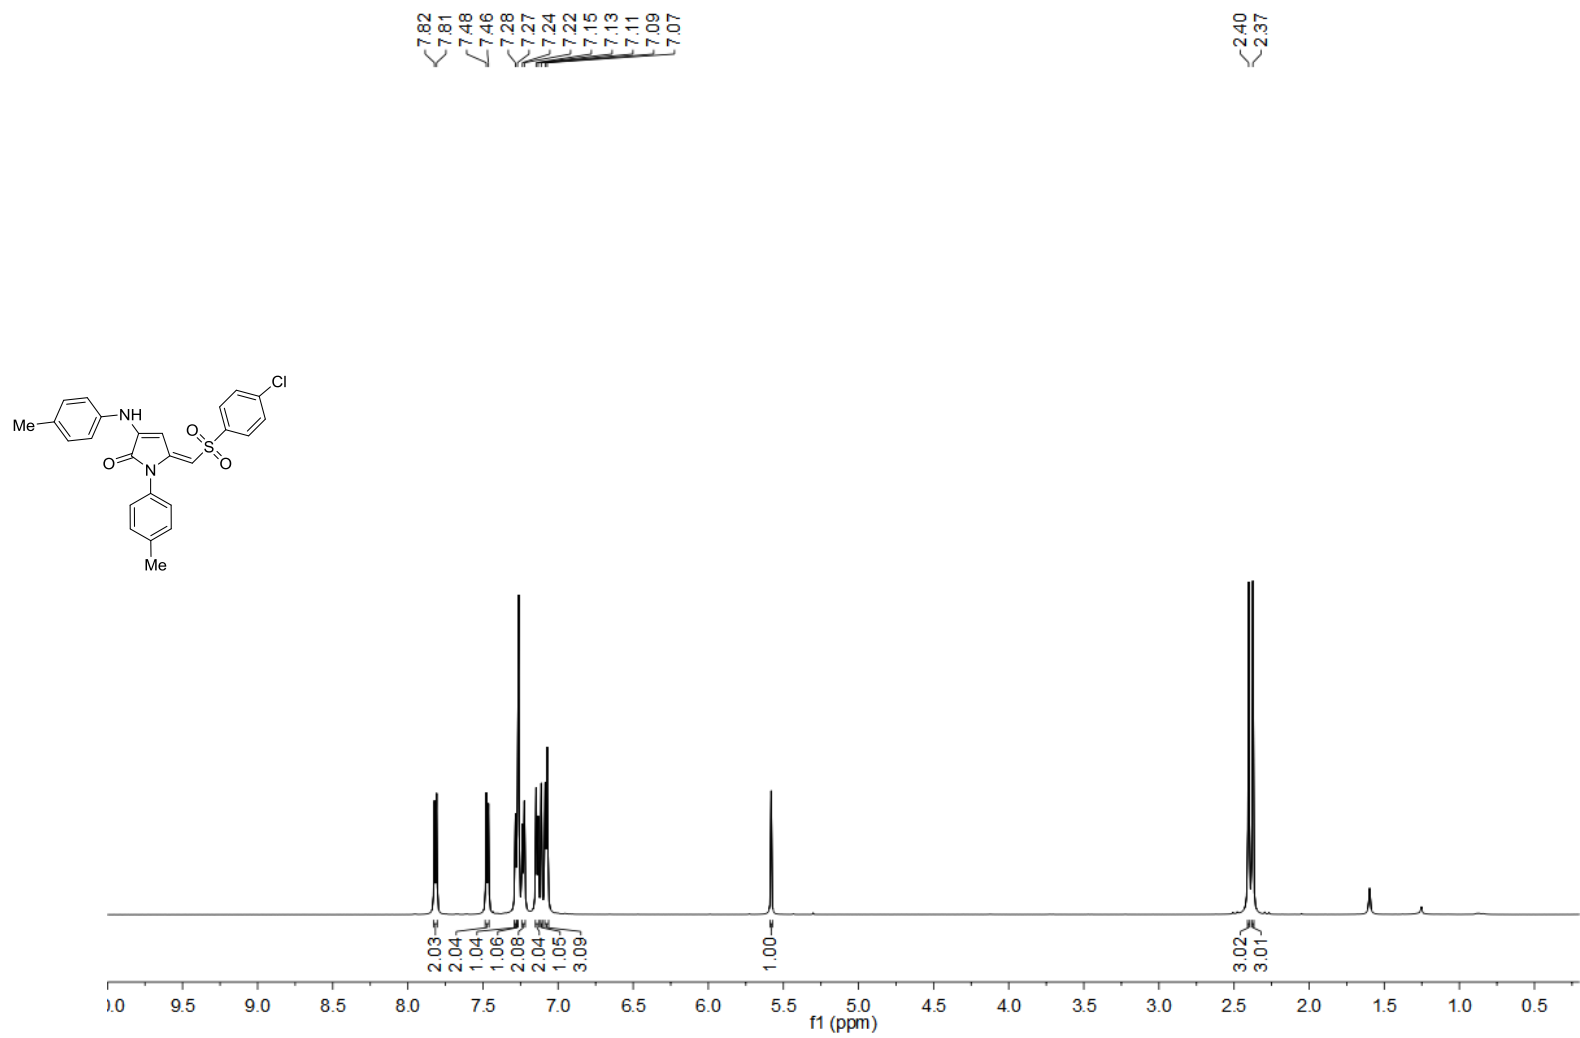

**Figure S66.** <sup>1</sup>H NMR (600 MHz, CDCl<sub>3</sub>) spectra of compound **5d**

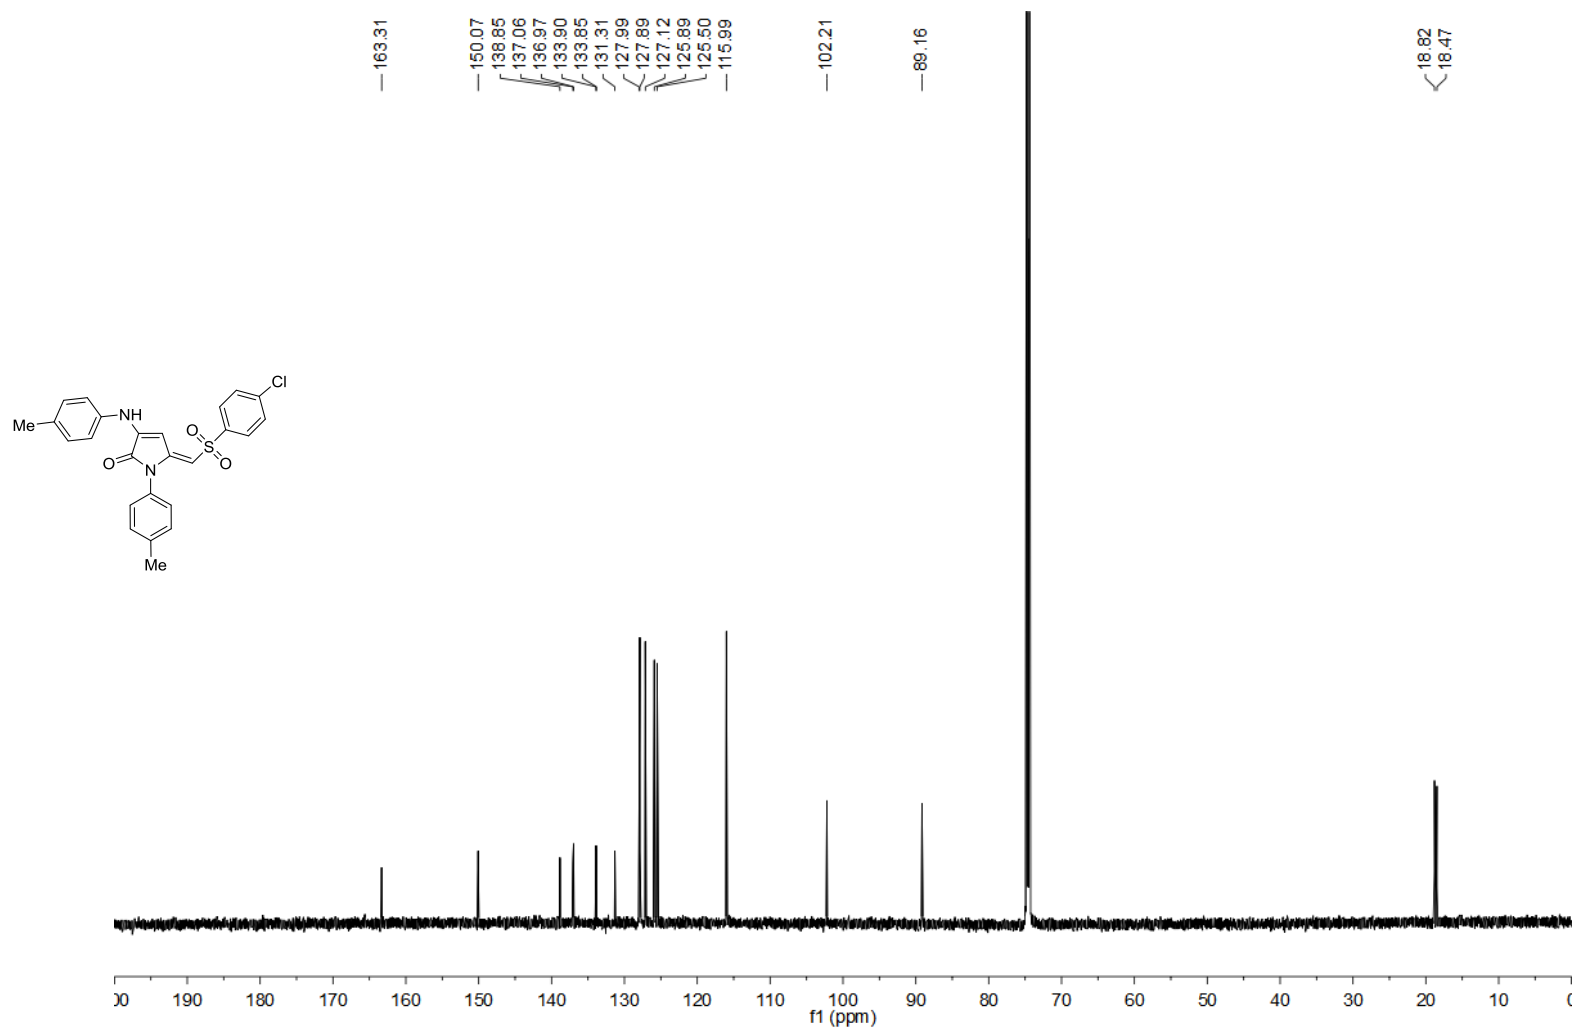

Figure S67. <sup>13</sup>C NMR (150 MHz, CDCl<sub>3</sub>) spectra of compound **5d**

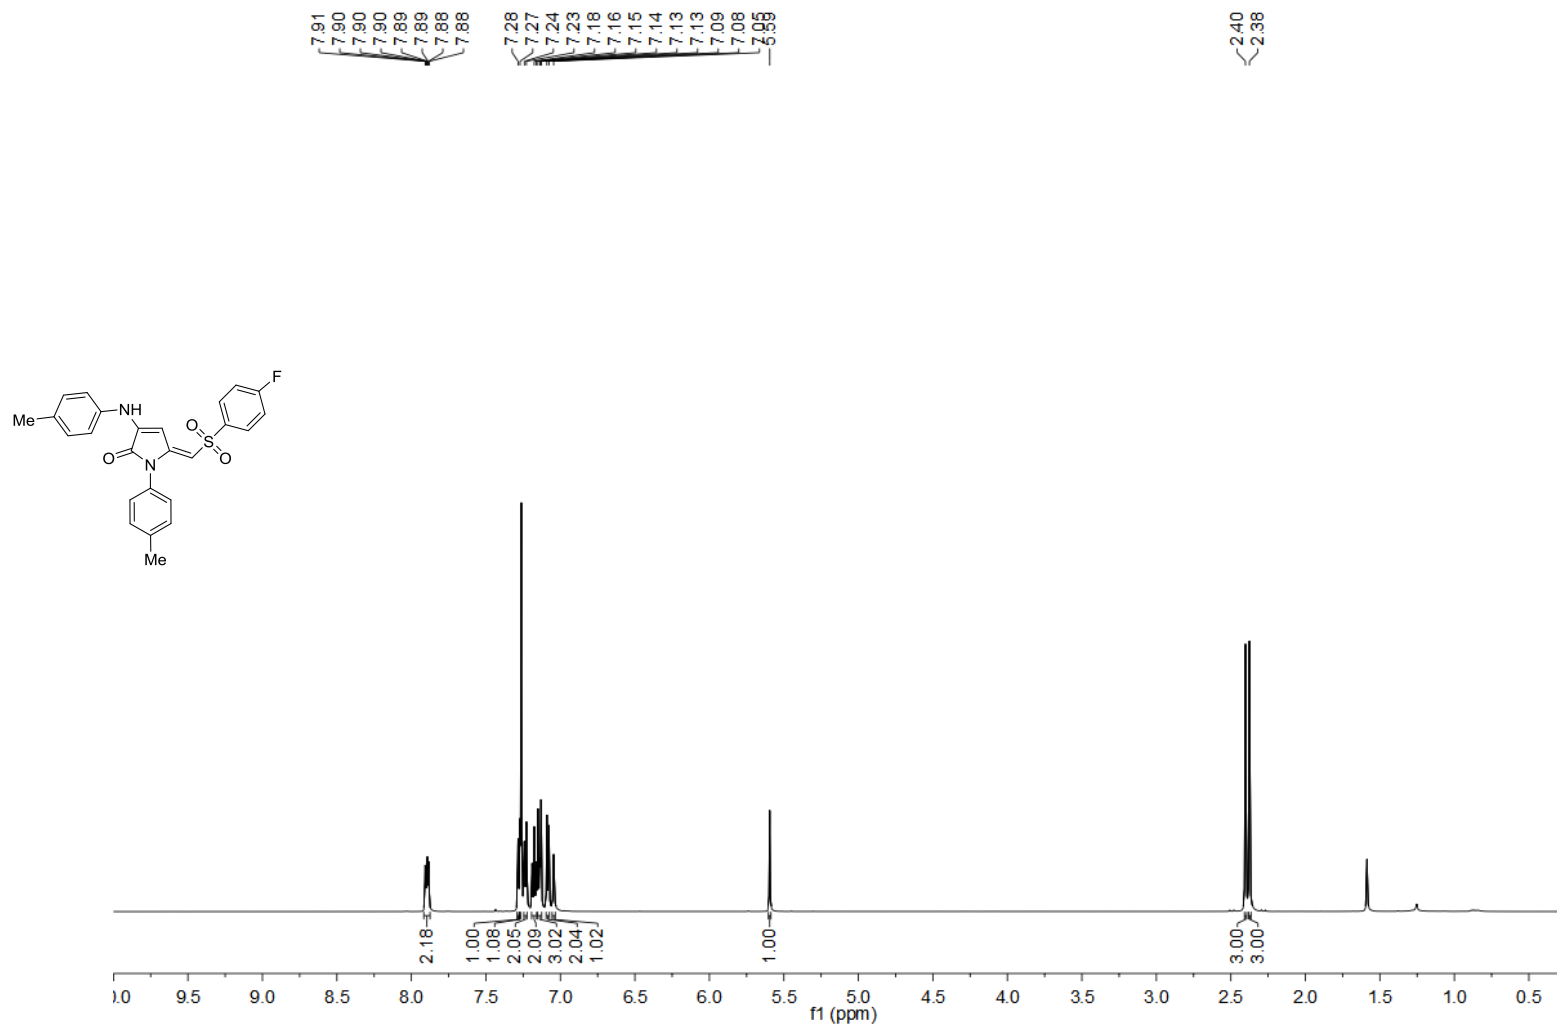

**Figure S68.**  $^1\text{H NMR}$  (600 MHz,  $\text{CDCl}_3$ ) spectra of compound **5e**



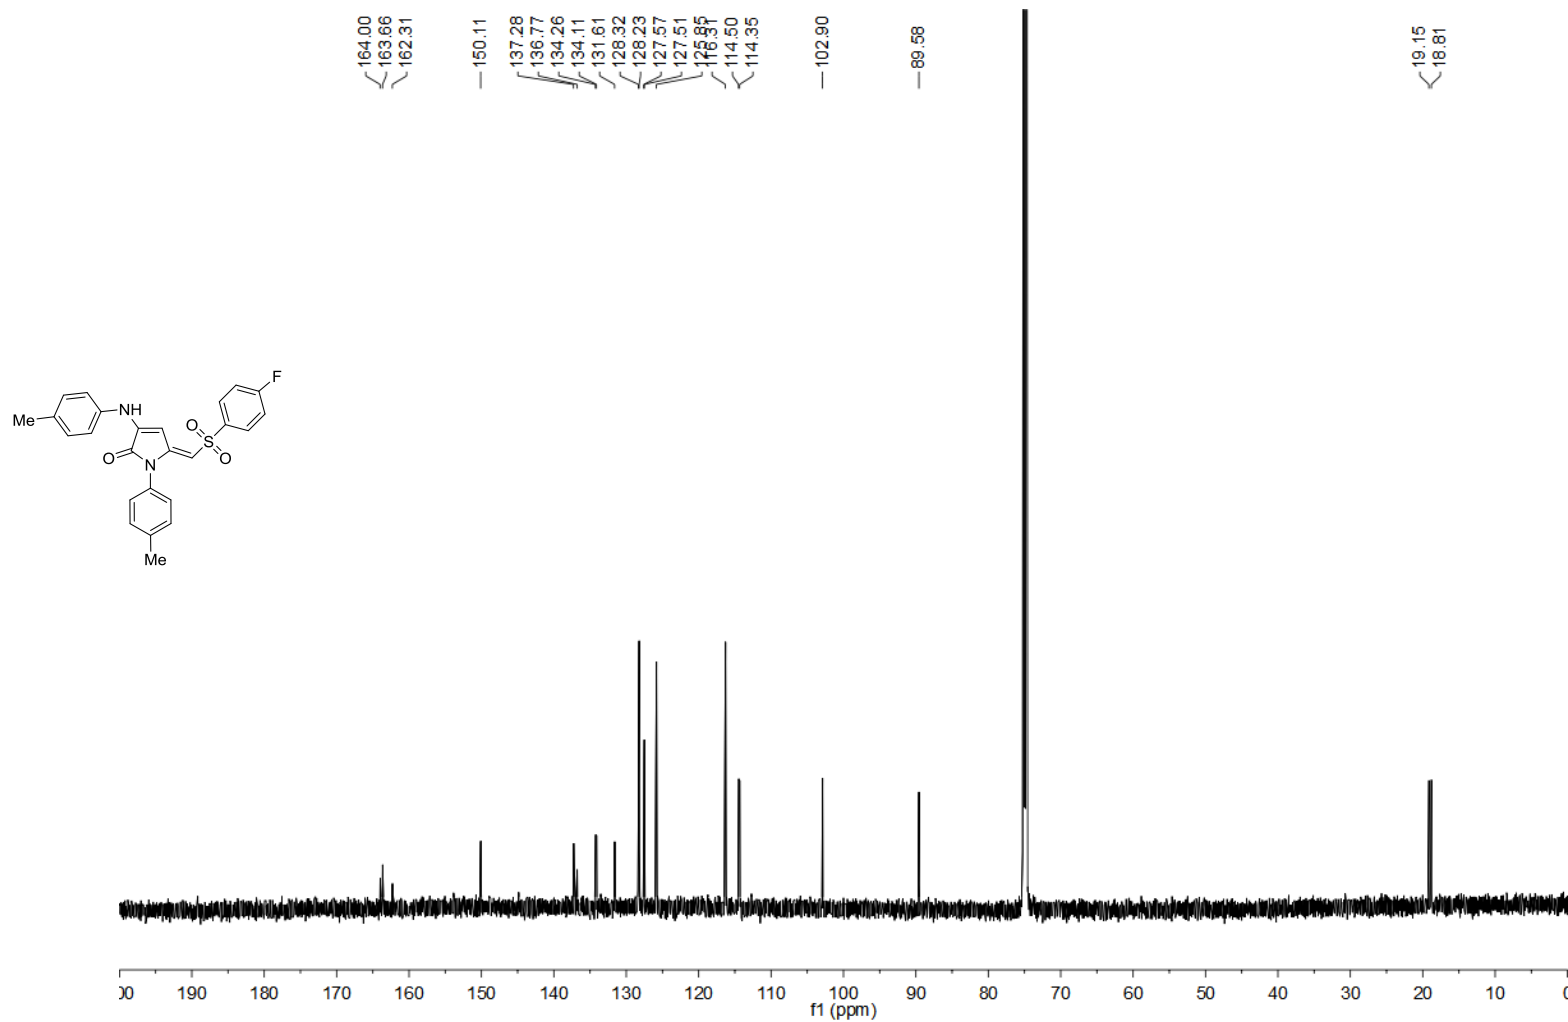

**Figure S69.** <sup>13</sup>C NMR (150 MHz, CDCl<sub>3</sub>) spectra of compound 5e

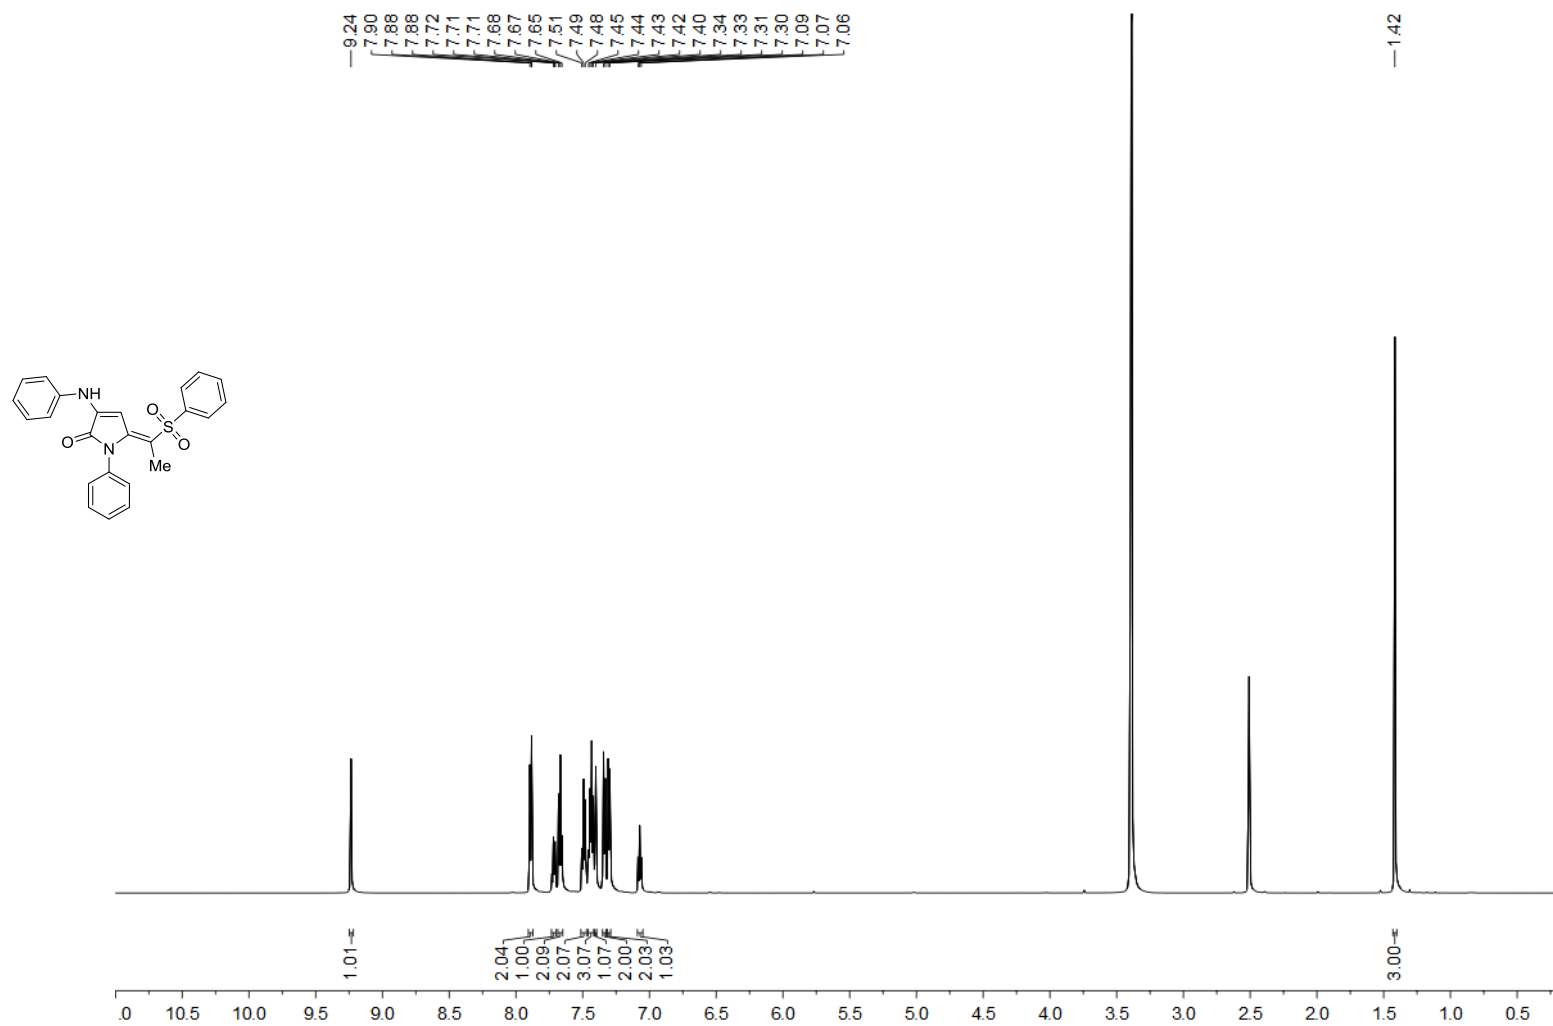

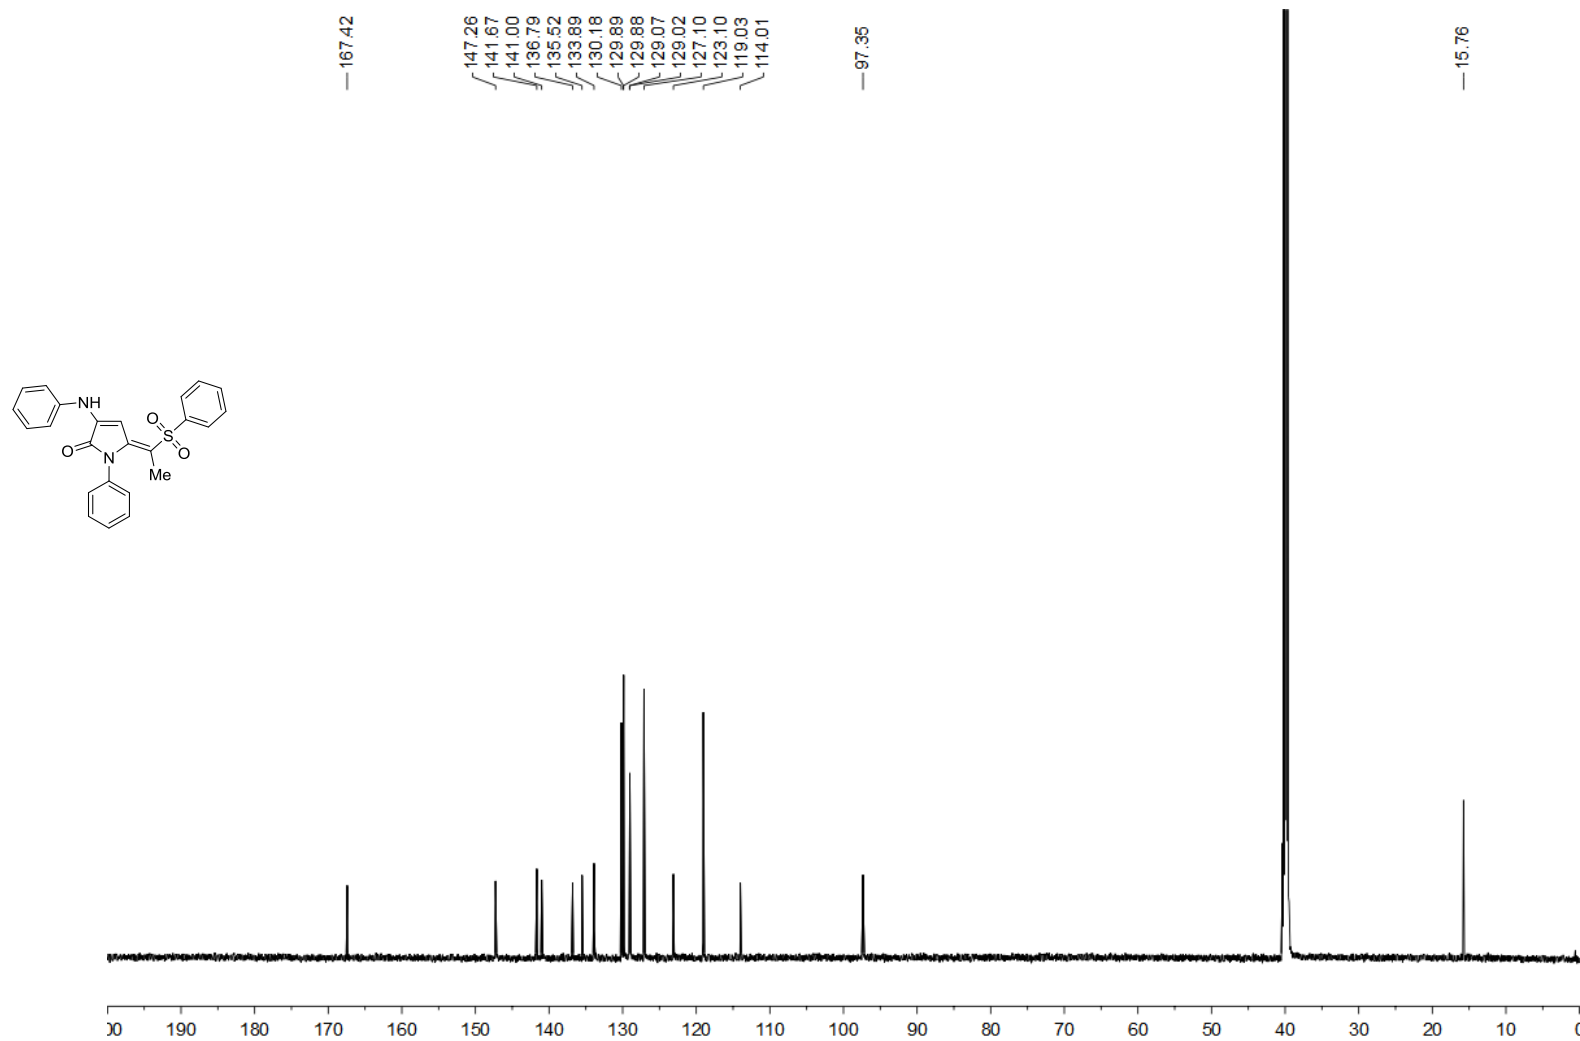

Figure S71. <sup>13</sup>C NMR (150 MHz, DMSO-*d*<sub>6</sub>) spectra of compound **6a**

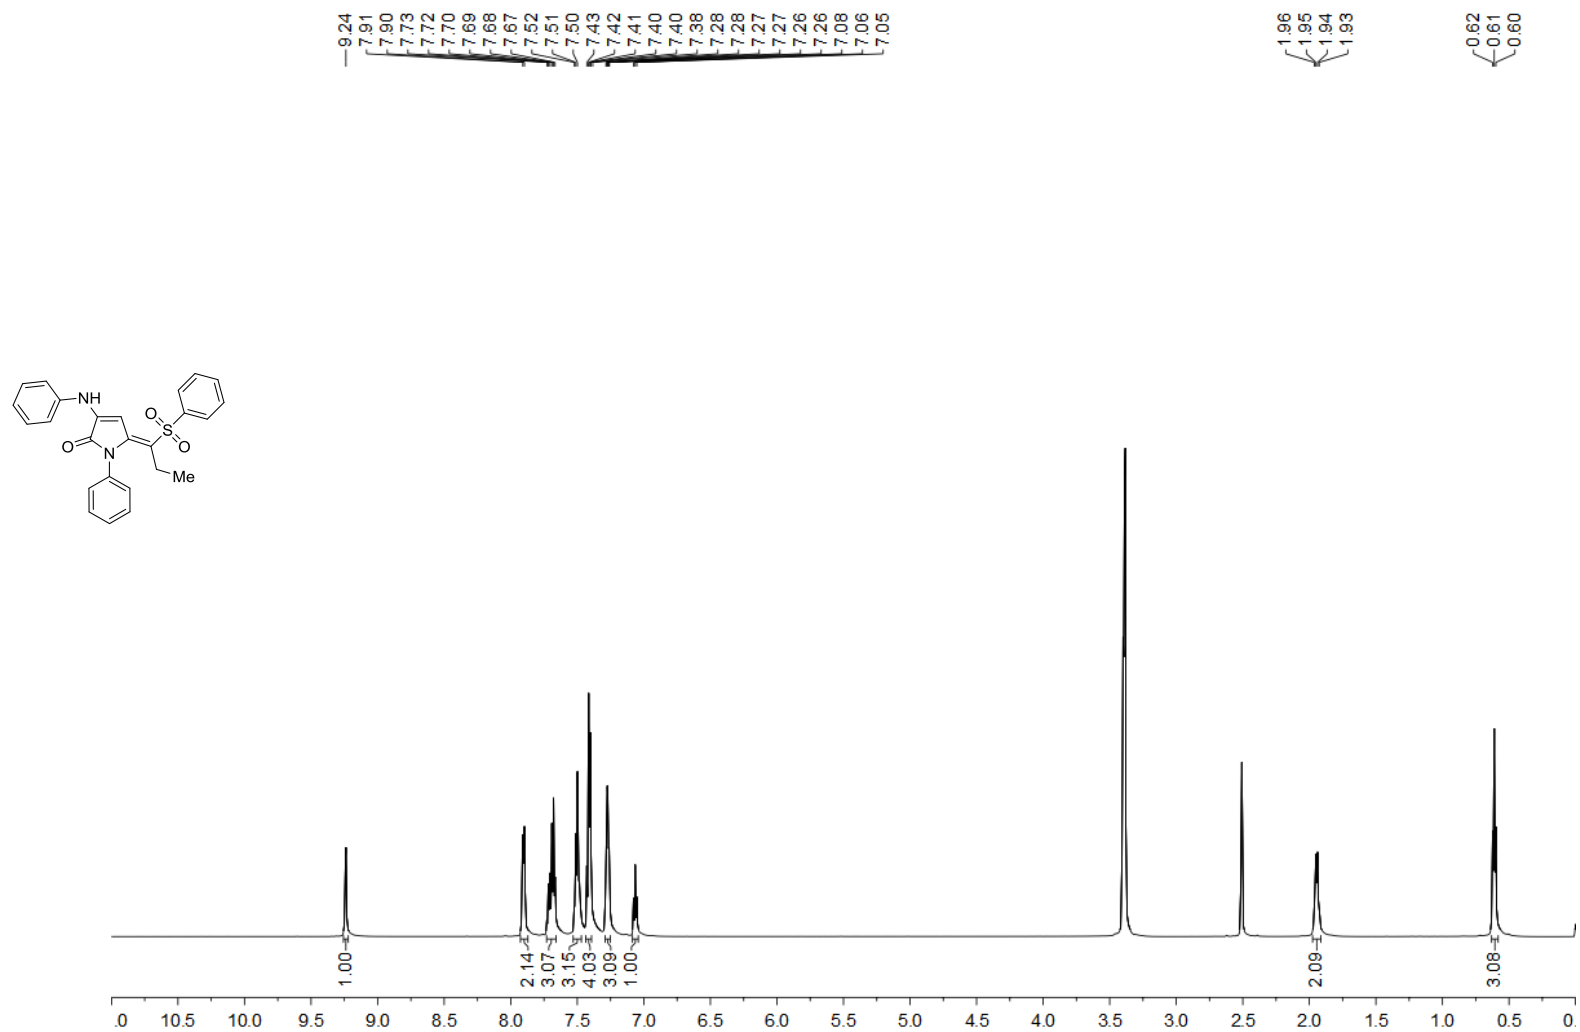

Figure S72.  $^1\text{H}$  NMR (600 MHz,  $\text{DMSO-}d_6$ ) spectra of compound **6b**

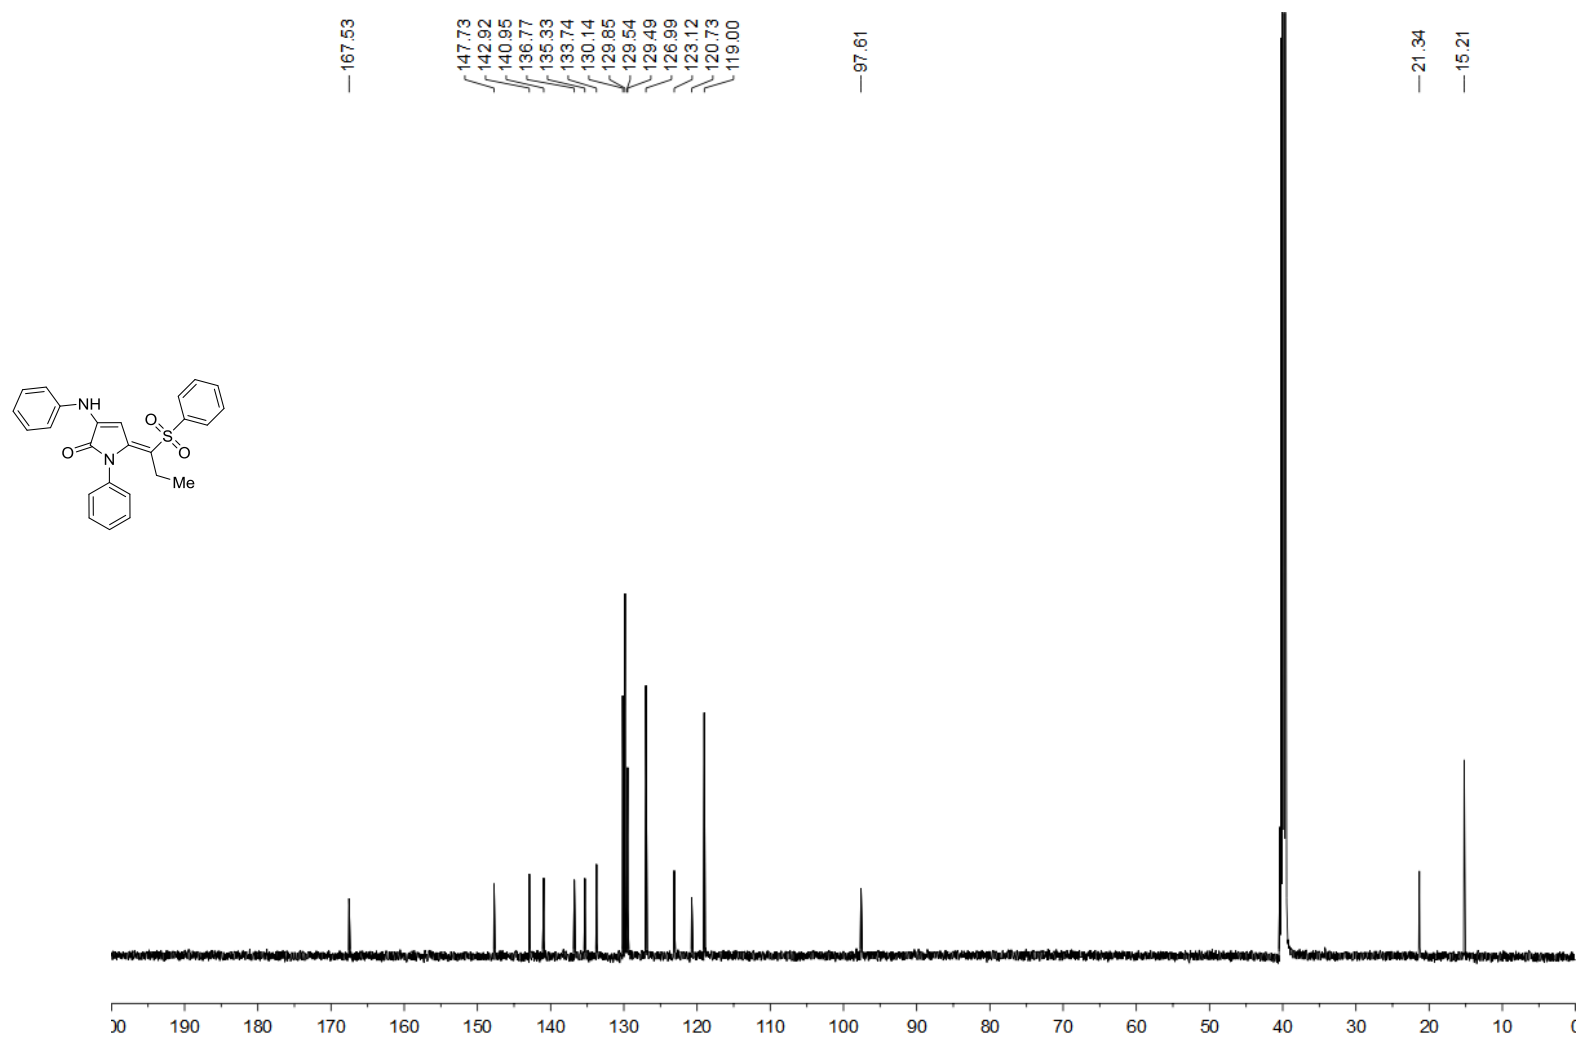

Figure S73.  $^{13}\text{C}$  NMR (150 MHz,  $\text{DMSO-}d_6$ ) spectra of compound **6b**

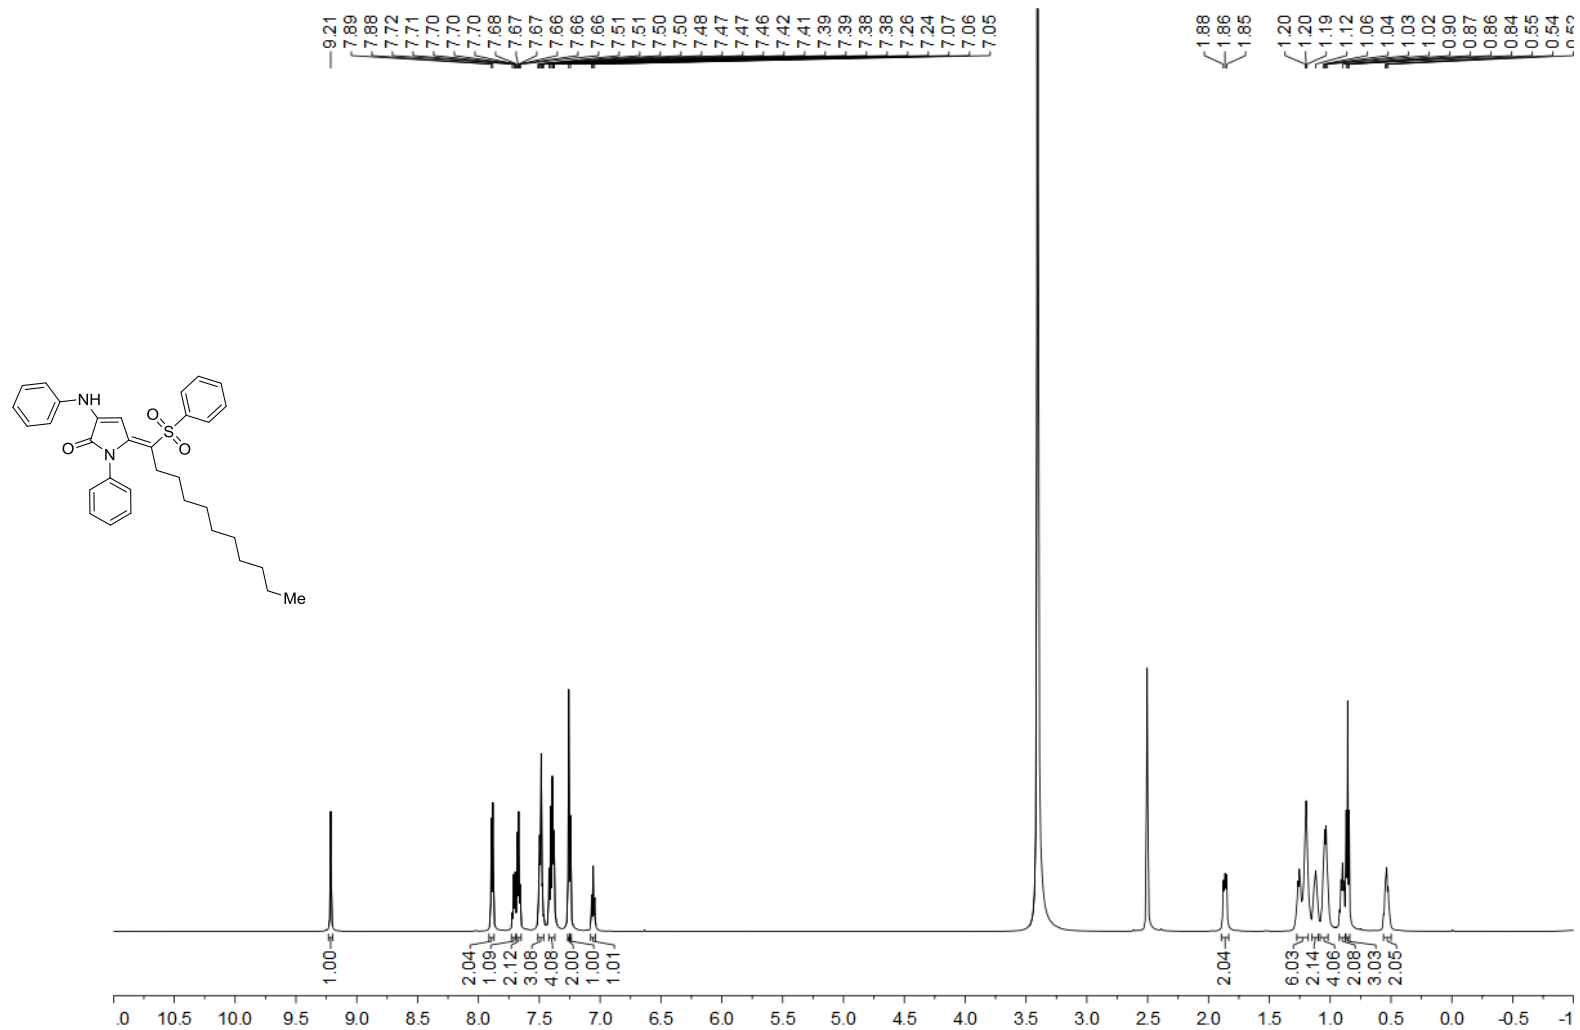

Figure S74. <sup>1</sup>H NMR (600 MHz, DMSO-*d*<sub>6</sub>) spectra of compound **6c**

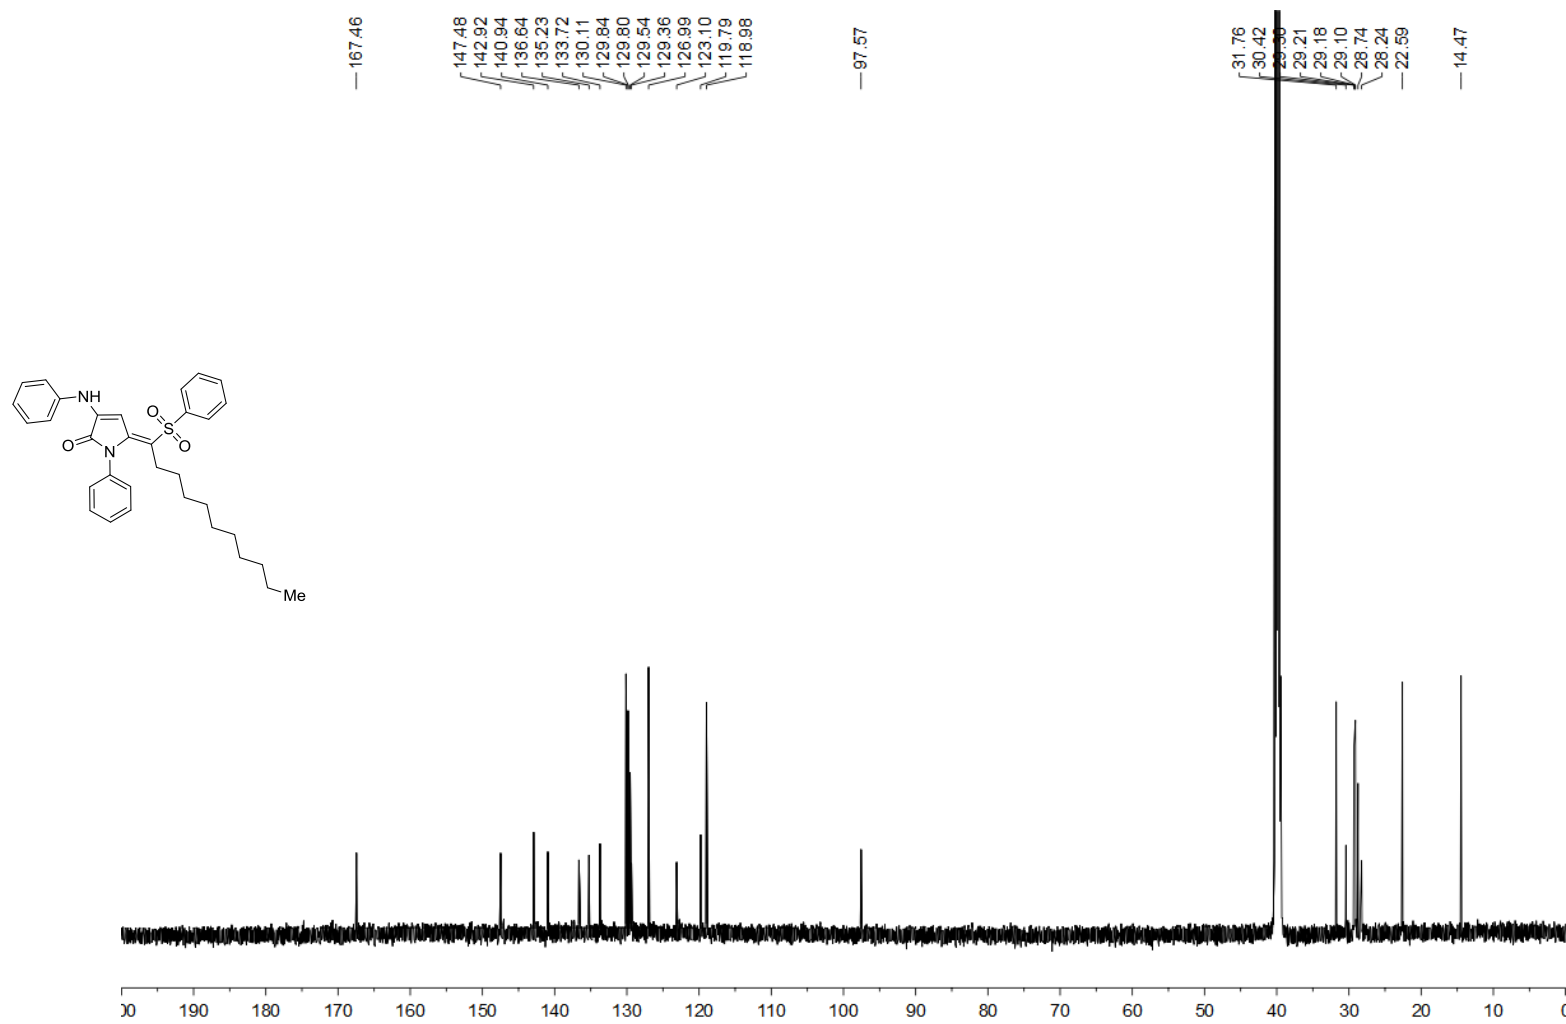

**Figure S75.**  $^{13}\text{C}$  NMR (150 MHz,  $\text{DMSO-}d_6$ ) spectra of compound **6c**

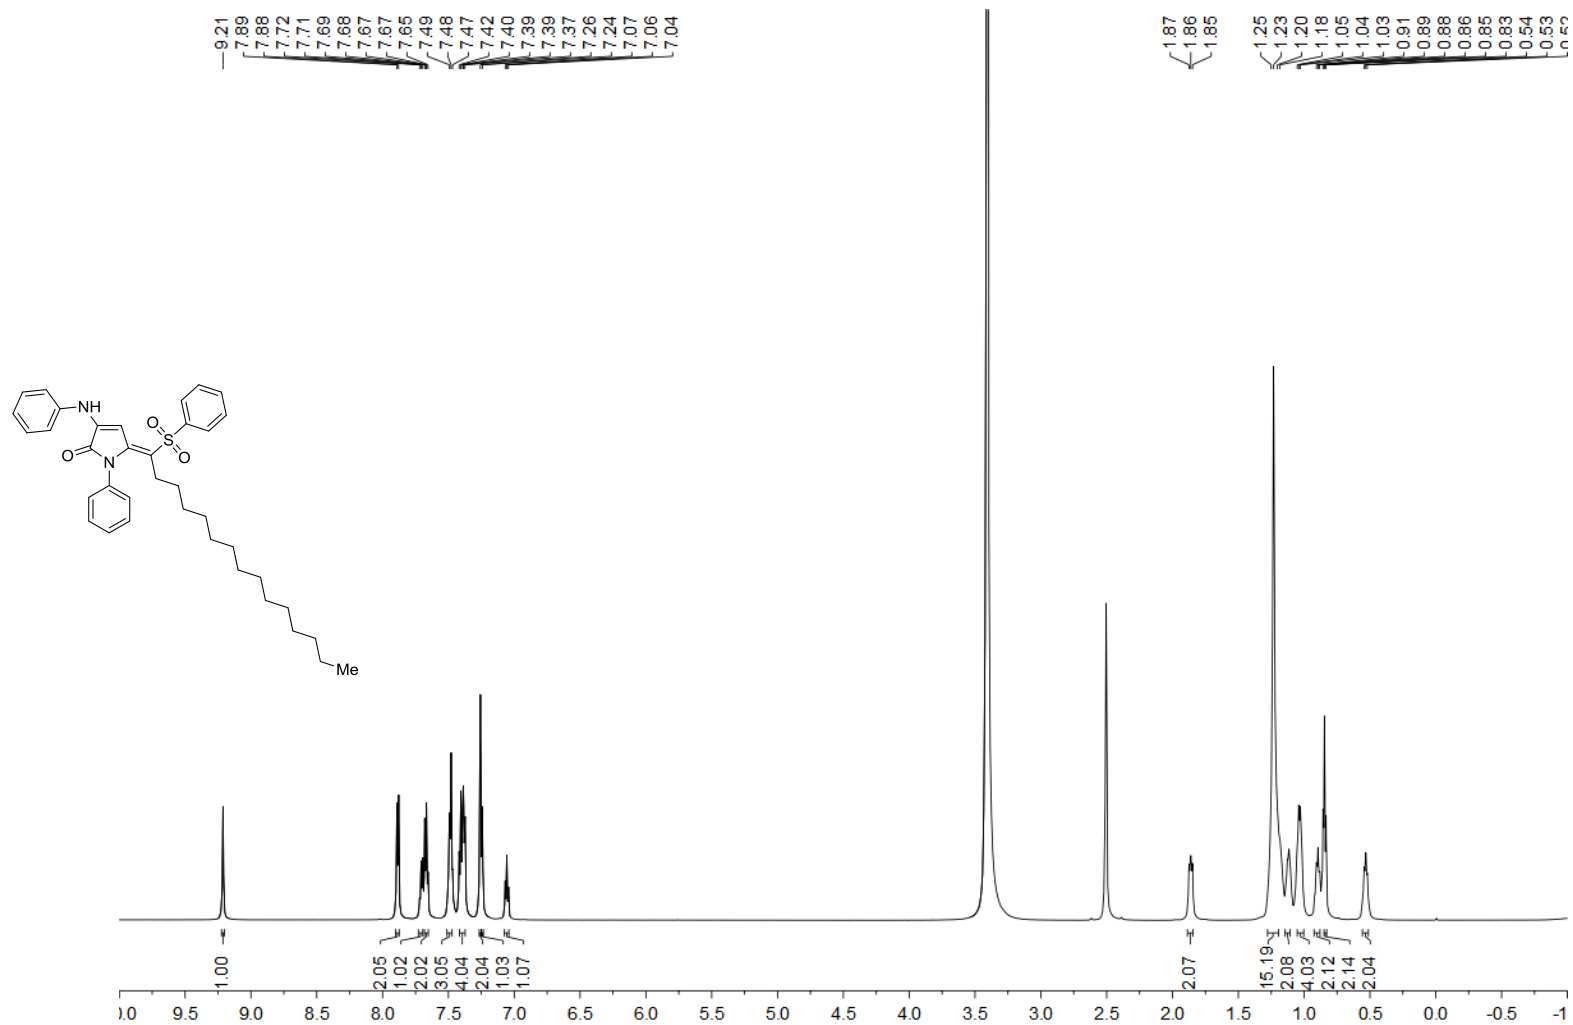

**Figure S76.**  $^1\text{H NMR}$  (600 MHz,  $\text{DMSO-}d_6$ ) spectra of compound **6d**



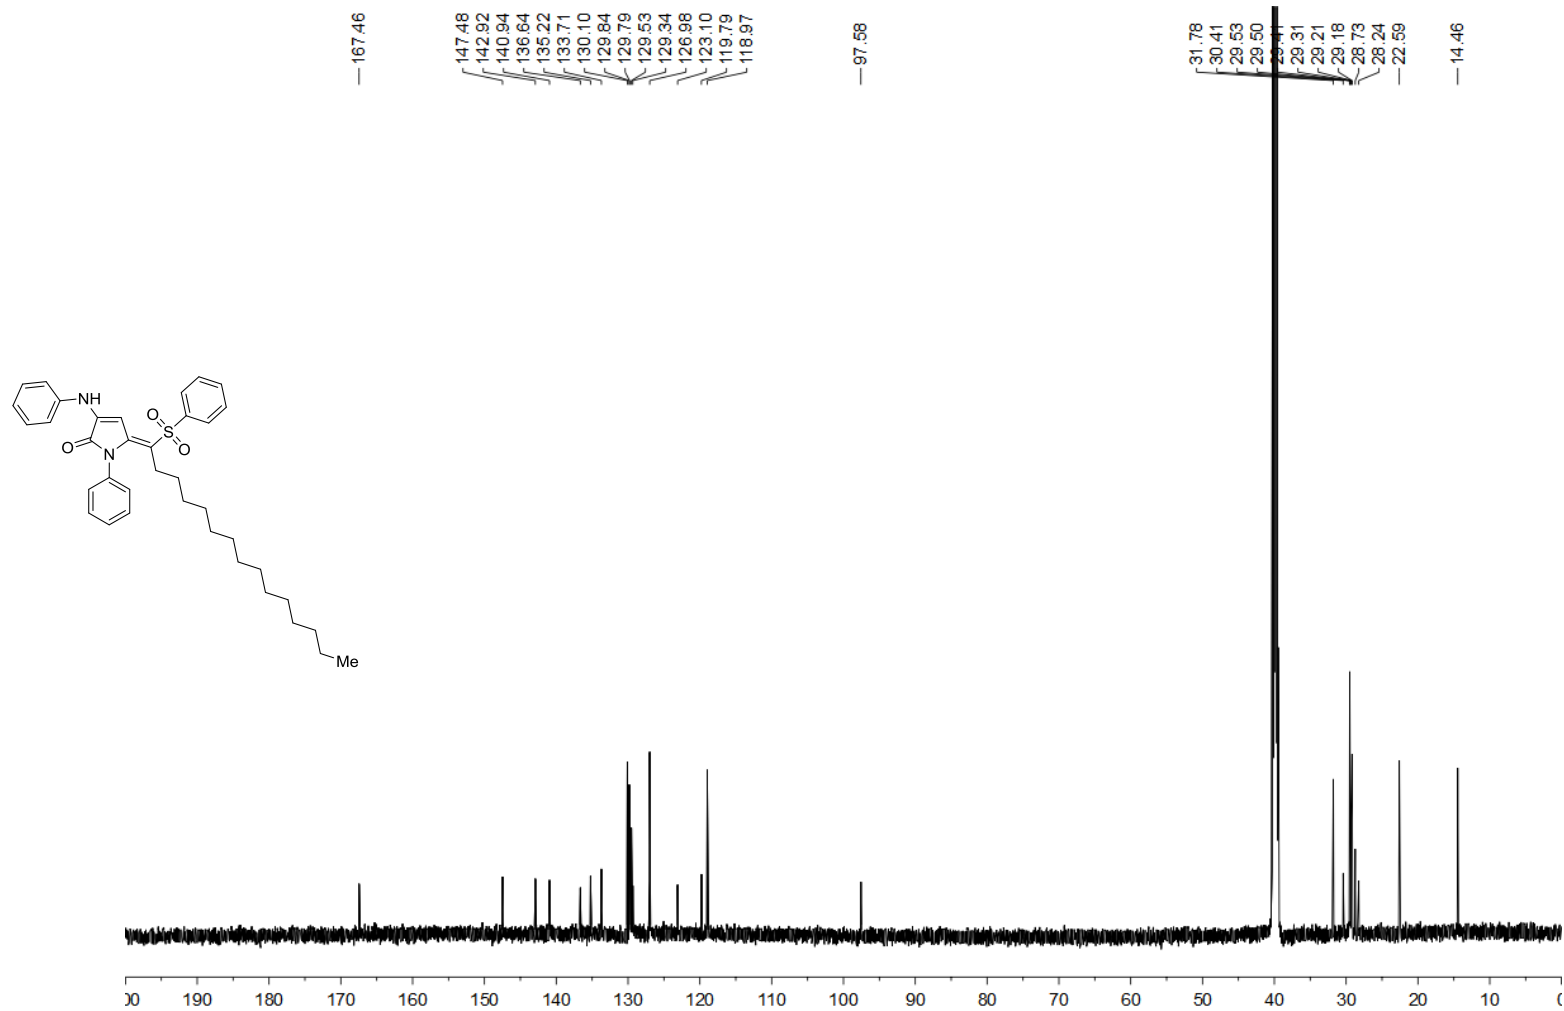

**Figure S77.**  $^{13}\text{C}$  NMR (150 MHz,  $\text{DMSO-}d_6$ ) spectra of compound **6d**

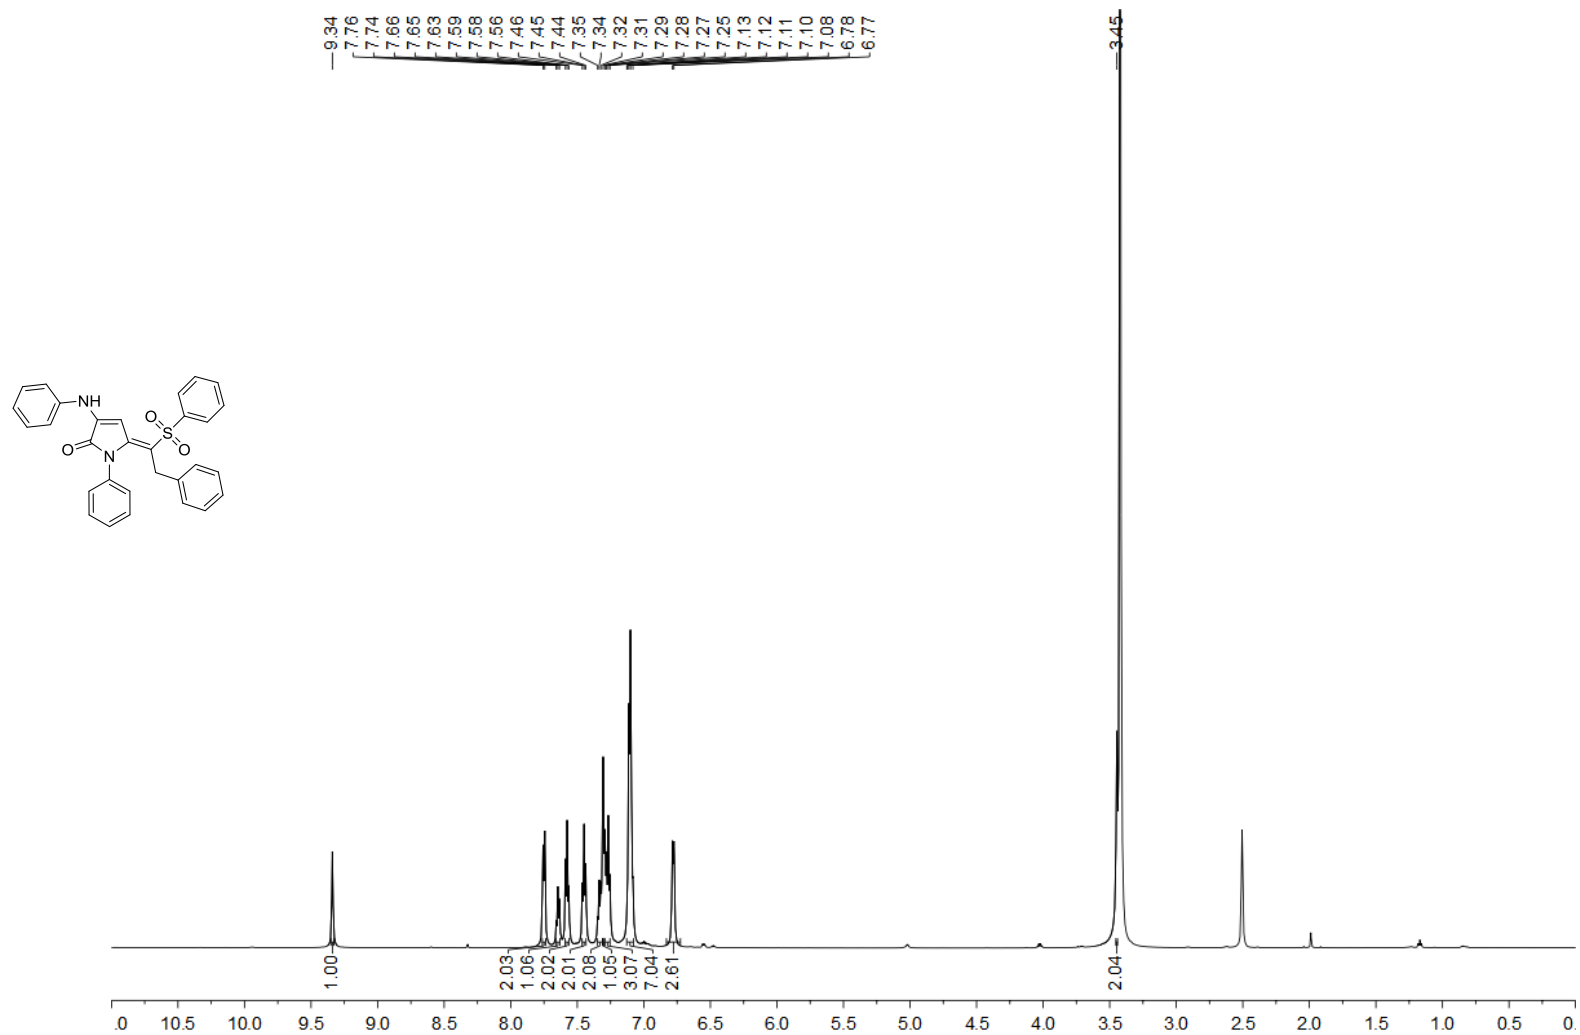

Figure S78. <sup>1</sup>H NMR (600 MHz, DMSO-*d*<sub>6</sub>) spectra of compound **6e**

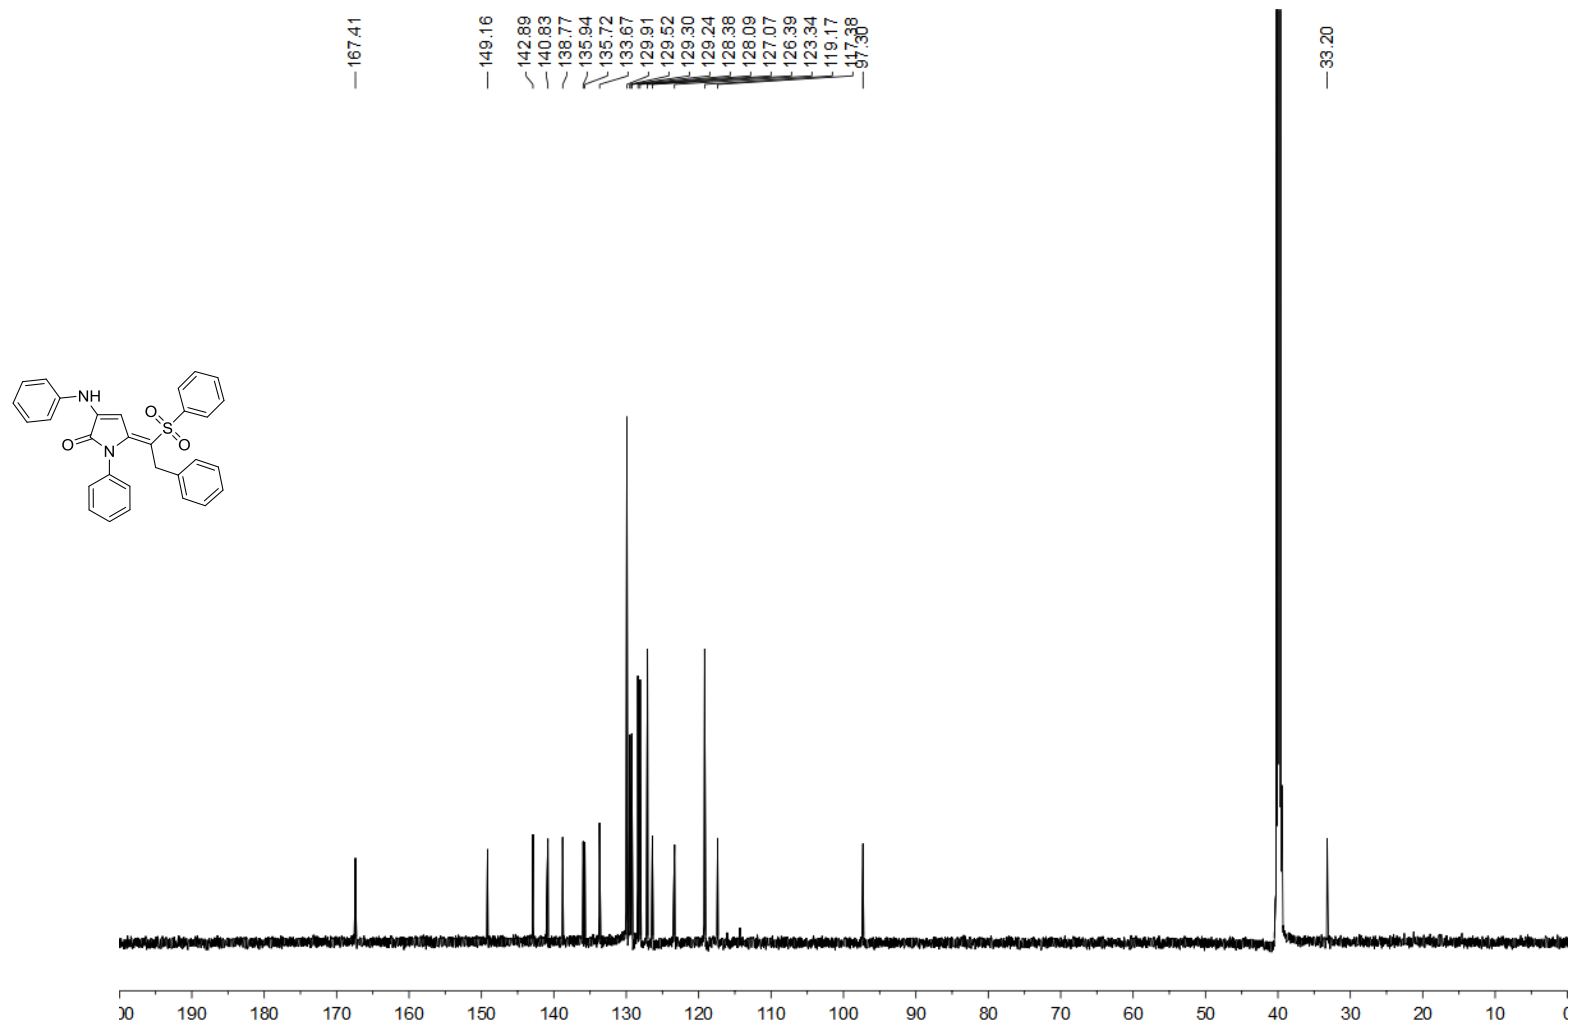

**Figure S79.** <sup>13</sup>C NMR (150 MHz, DMSO-*d*<sub>6</sub>) spectra of compound **6e**

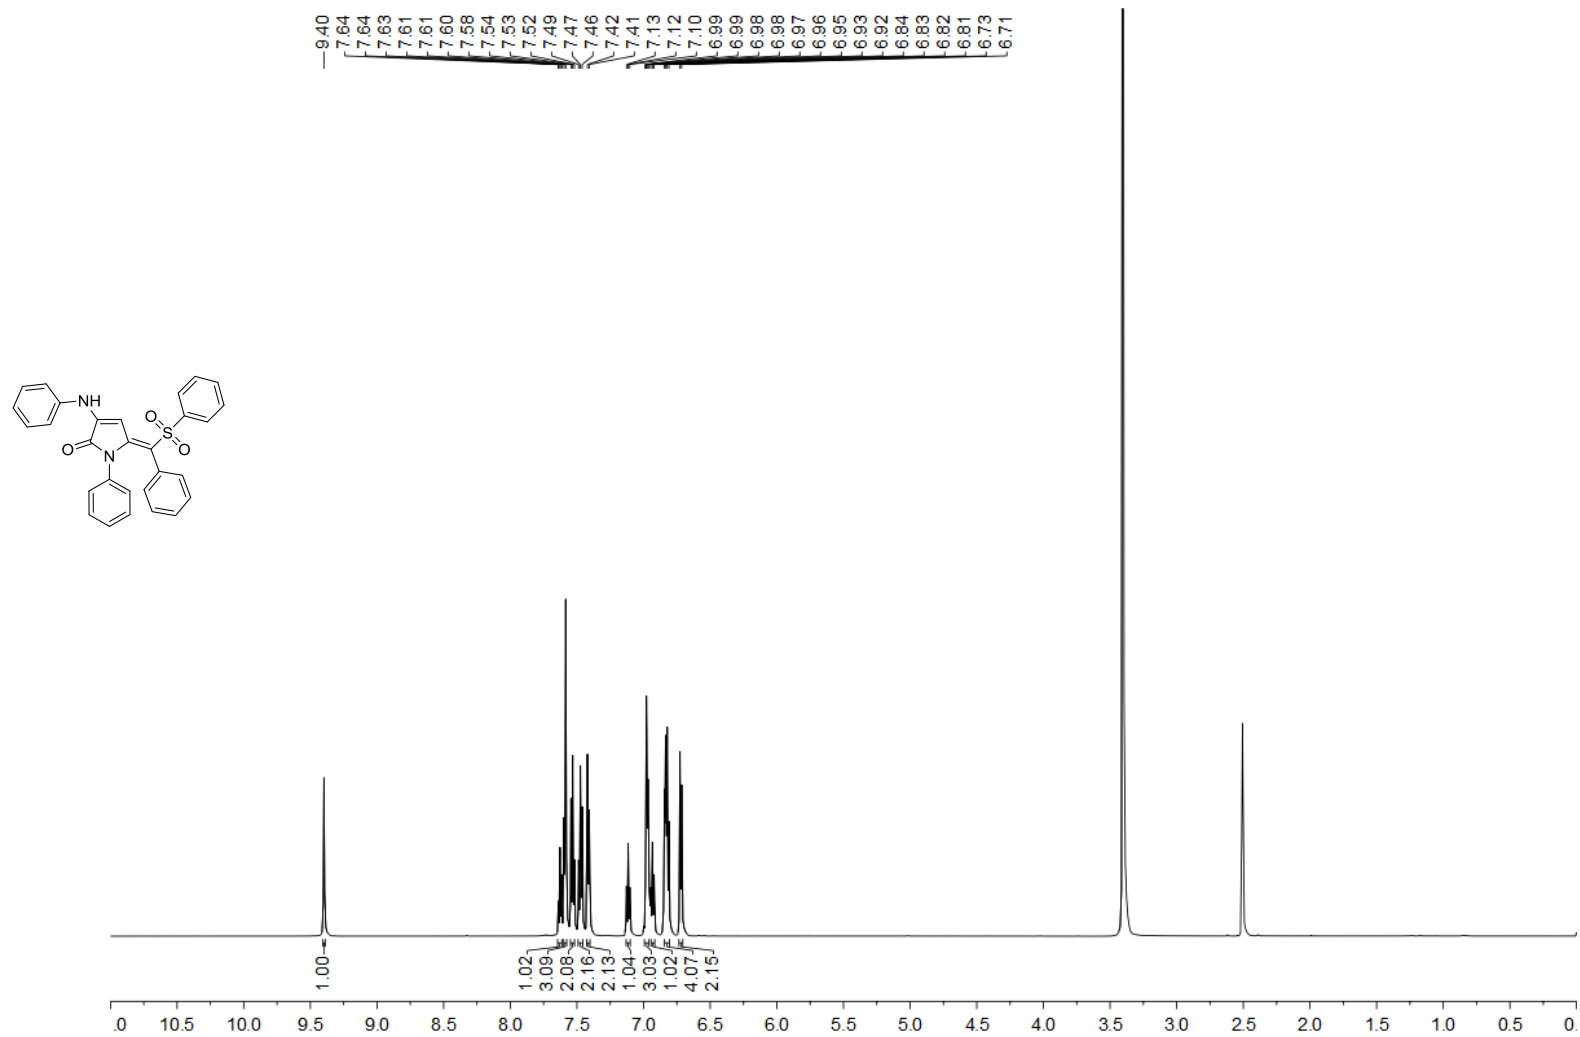

Figure S80. <sup>1</sup>H NMR (600 MHz, DMSO-*d*<sub>6</sub>) spectra of compound **6f**

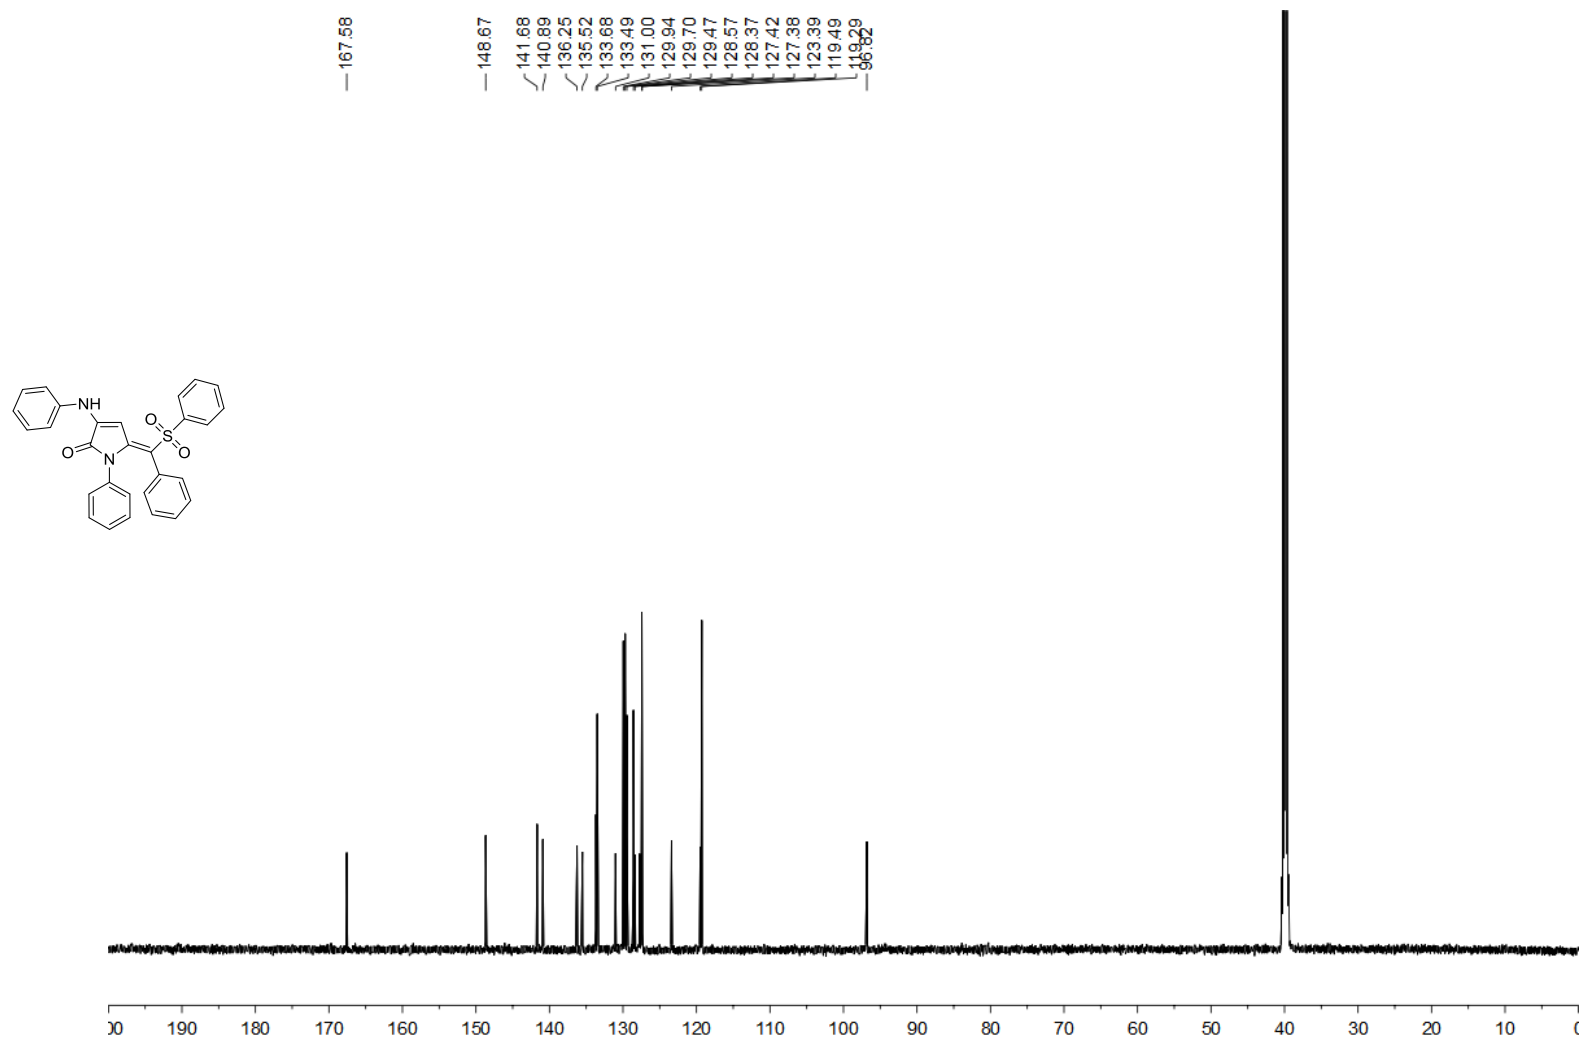

**Figure S81.** <sup>13</sup>C NMR (150 MHz, DMSO-*d*<sub>6</sub>) spectra of compound **6f**

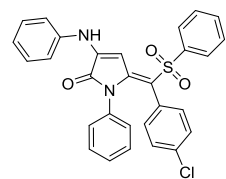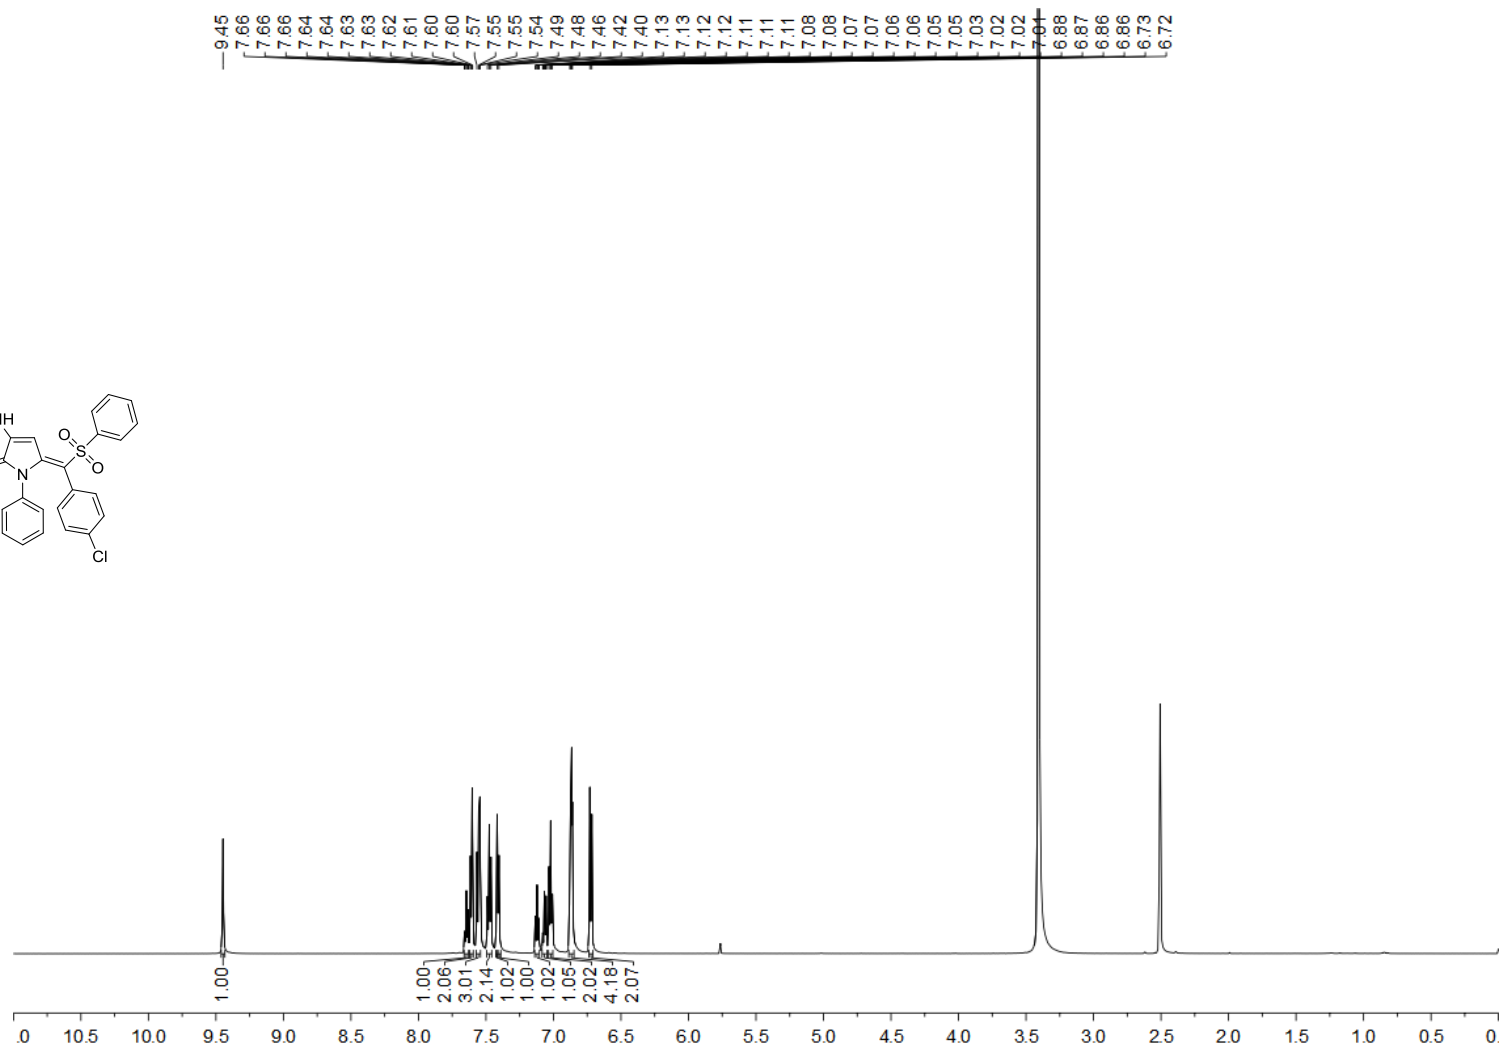

Figure S82.  $^1\text{H}$  NMR (600 MHz,  $\text{DMSO-}d_6$ ) spectra of compound **6g**

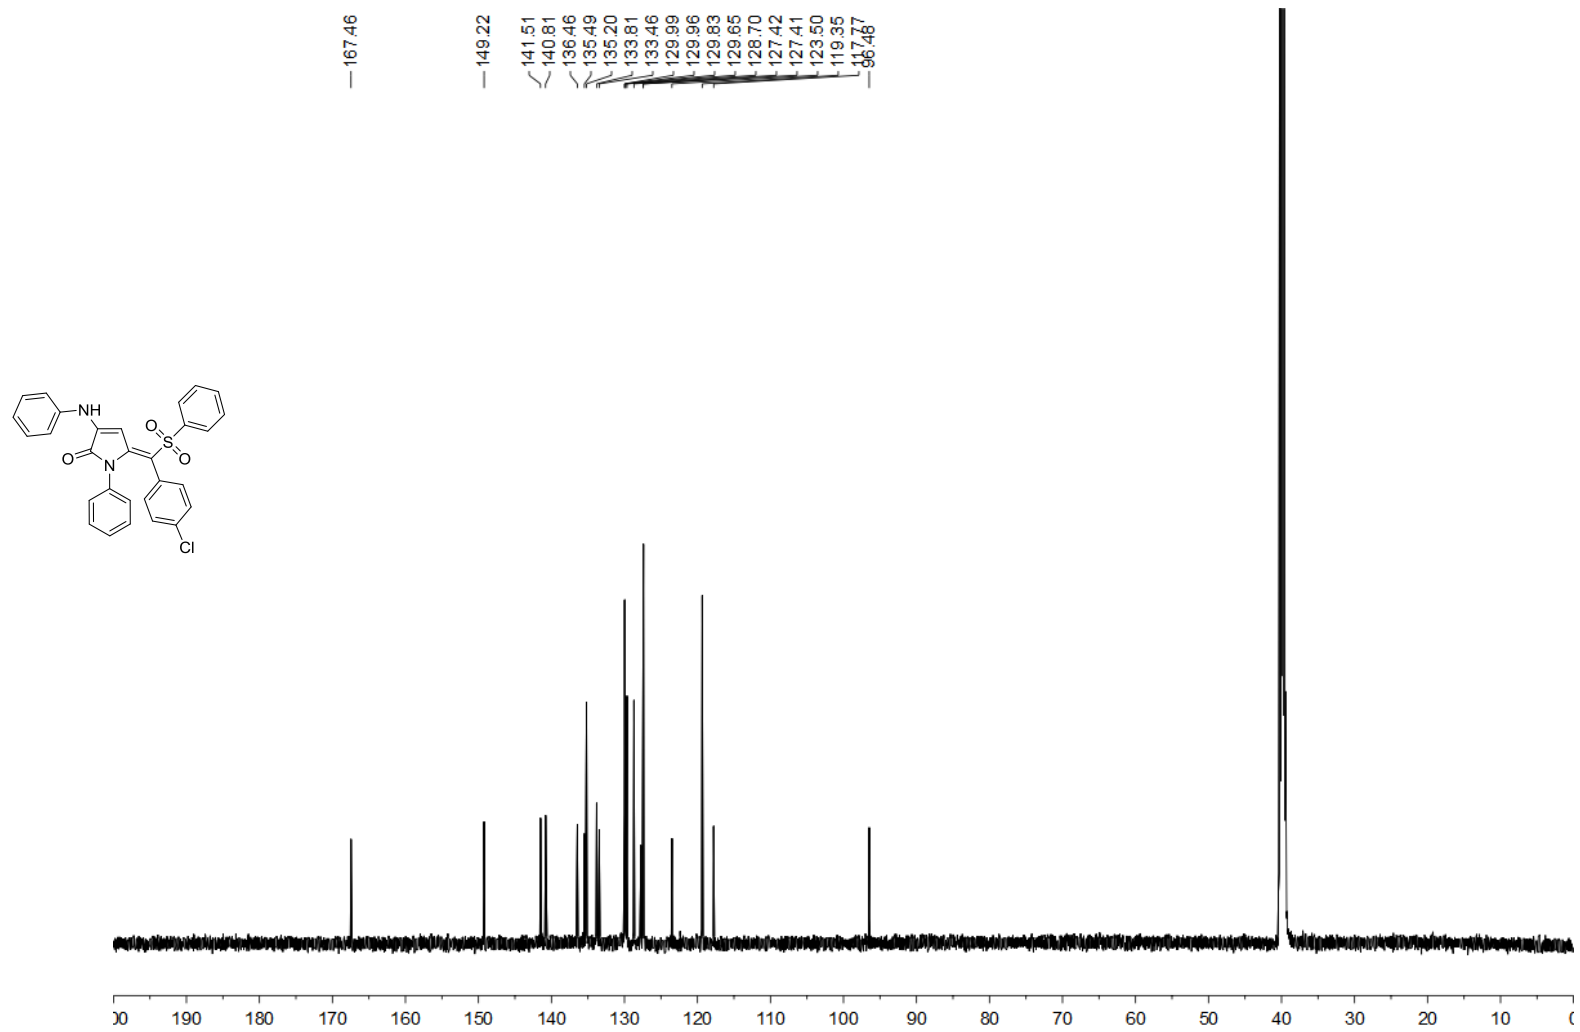

Figure S83.  $^{13}\text{C}$  NMR (150 MHz,  $\text{DMSO-}d_6$ ) spectra of compound **6g**

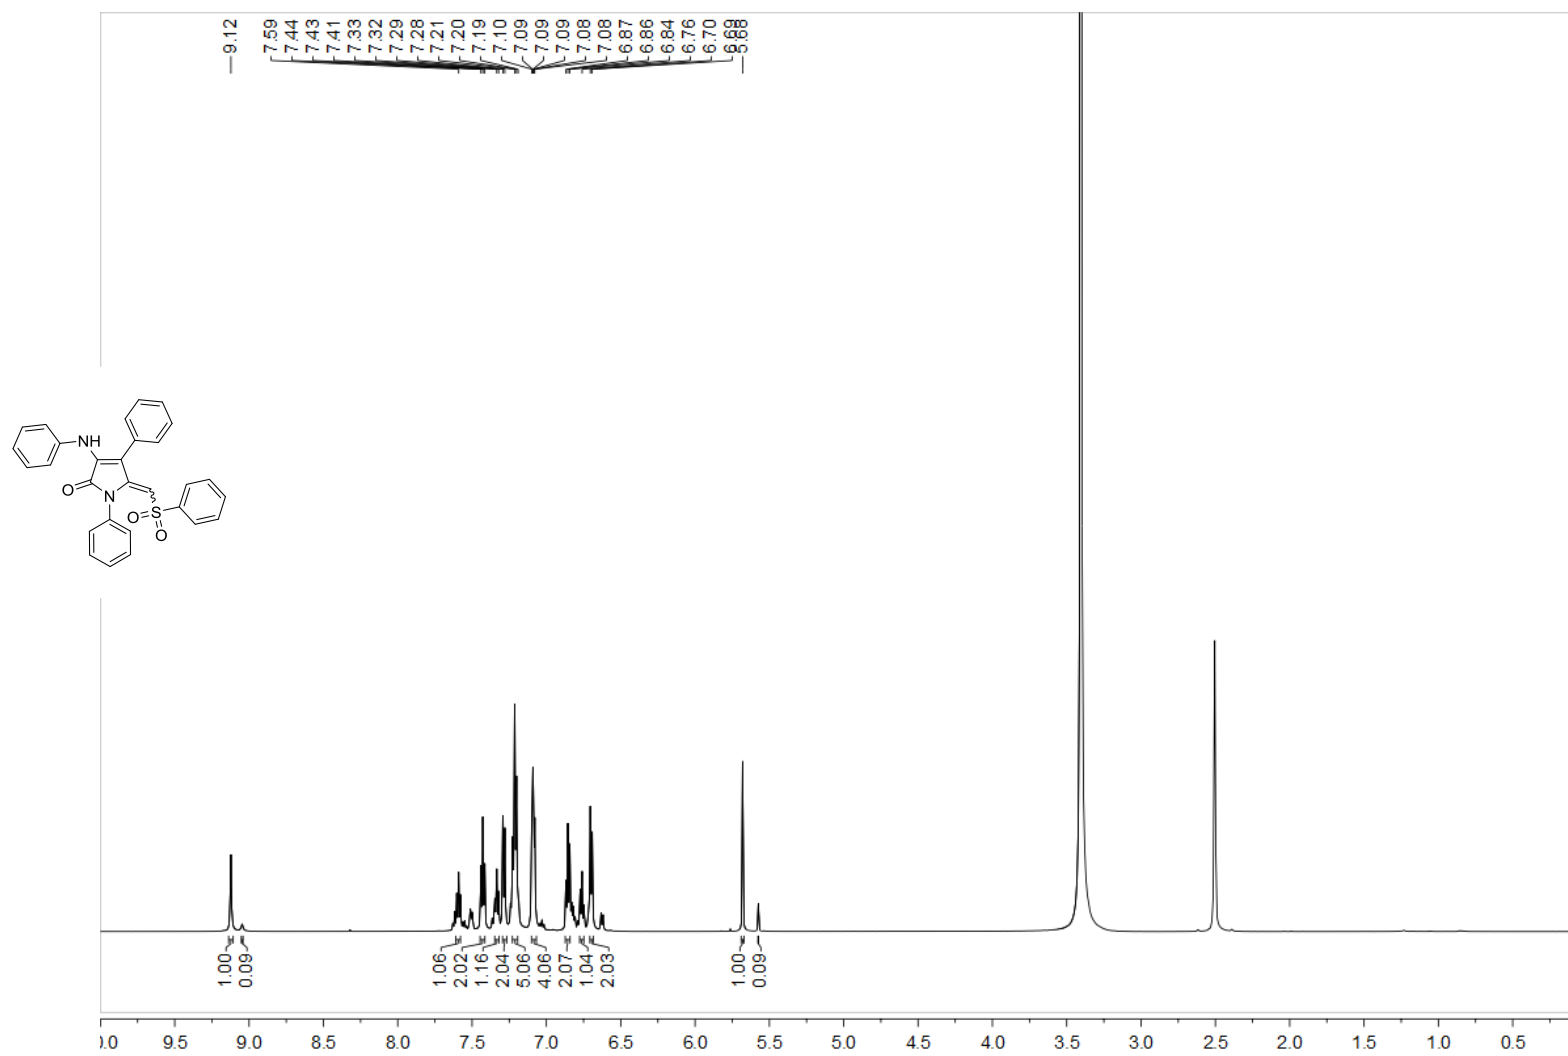

**Figure S84.** <sup>1</sup>H NMR (600 MHz, DMSO-*d*<sub>6</sub>) spectra of compound **7a**



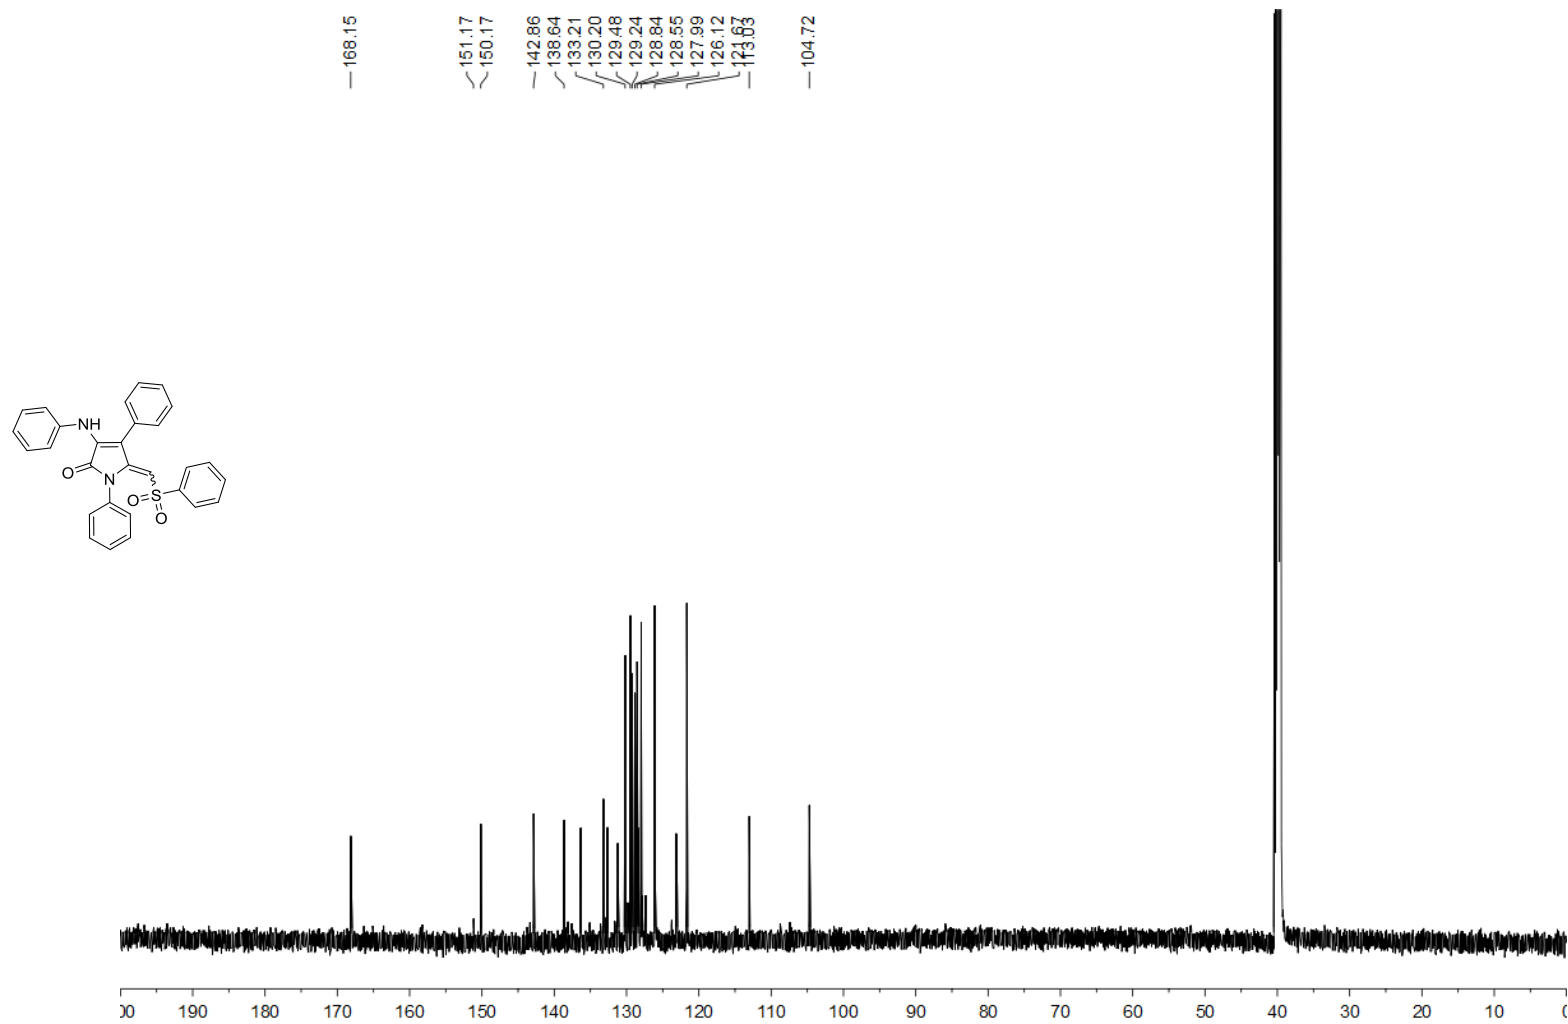

Figure S85. <sup>13</sup>C NMR (150 MHz, DMSO-*d*<sub>6</sub>) spectra of compound 7a

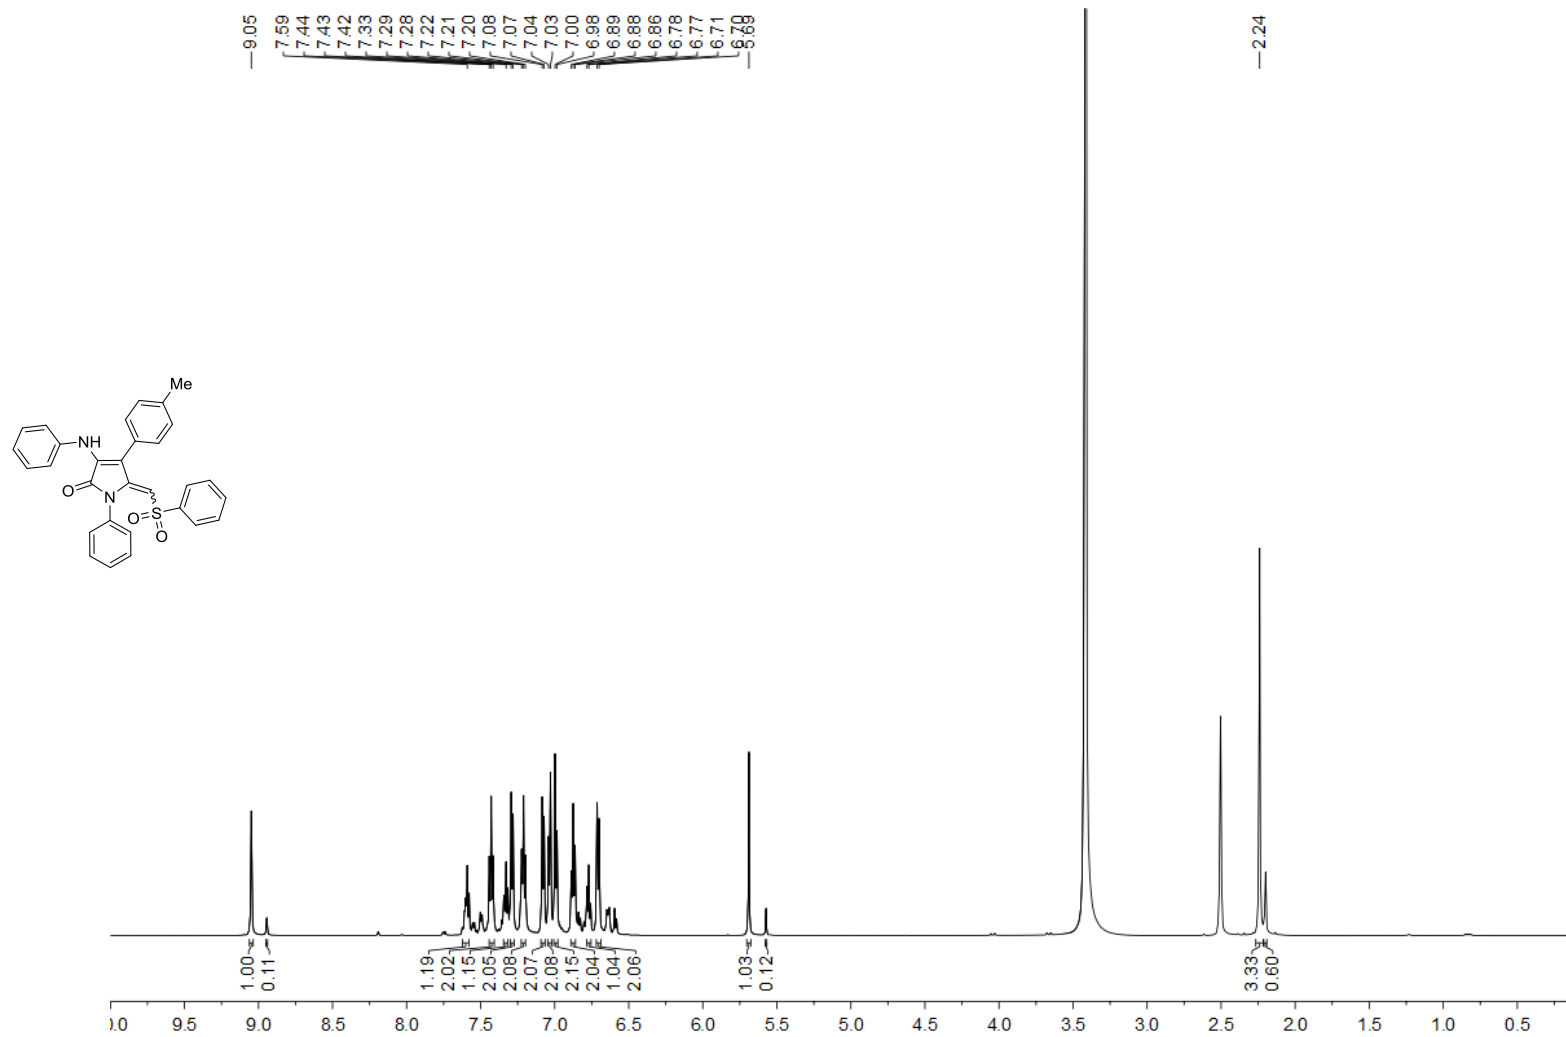

Figure S86.  $^1\text{H NMR}$  (600 MHz,  $\text{DMSO-}d_6$ ) spectra of compound **7b**

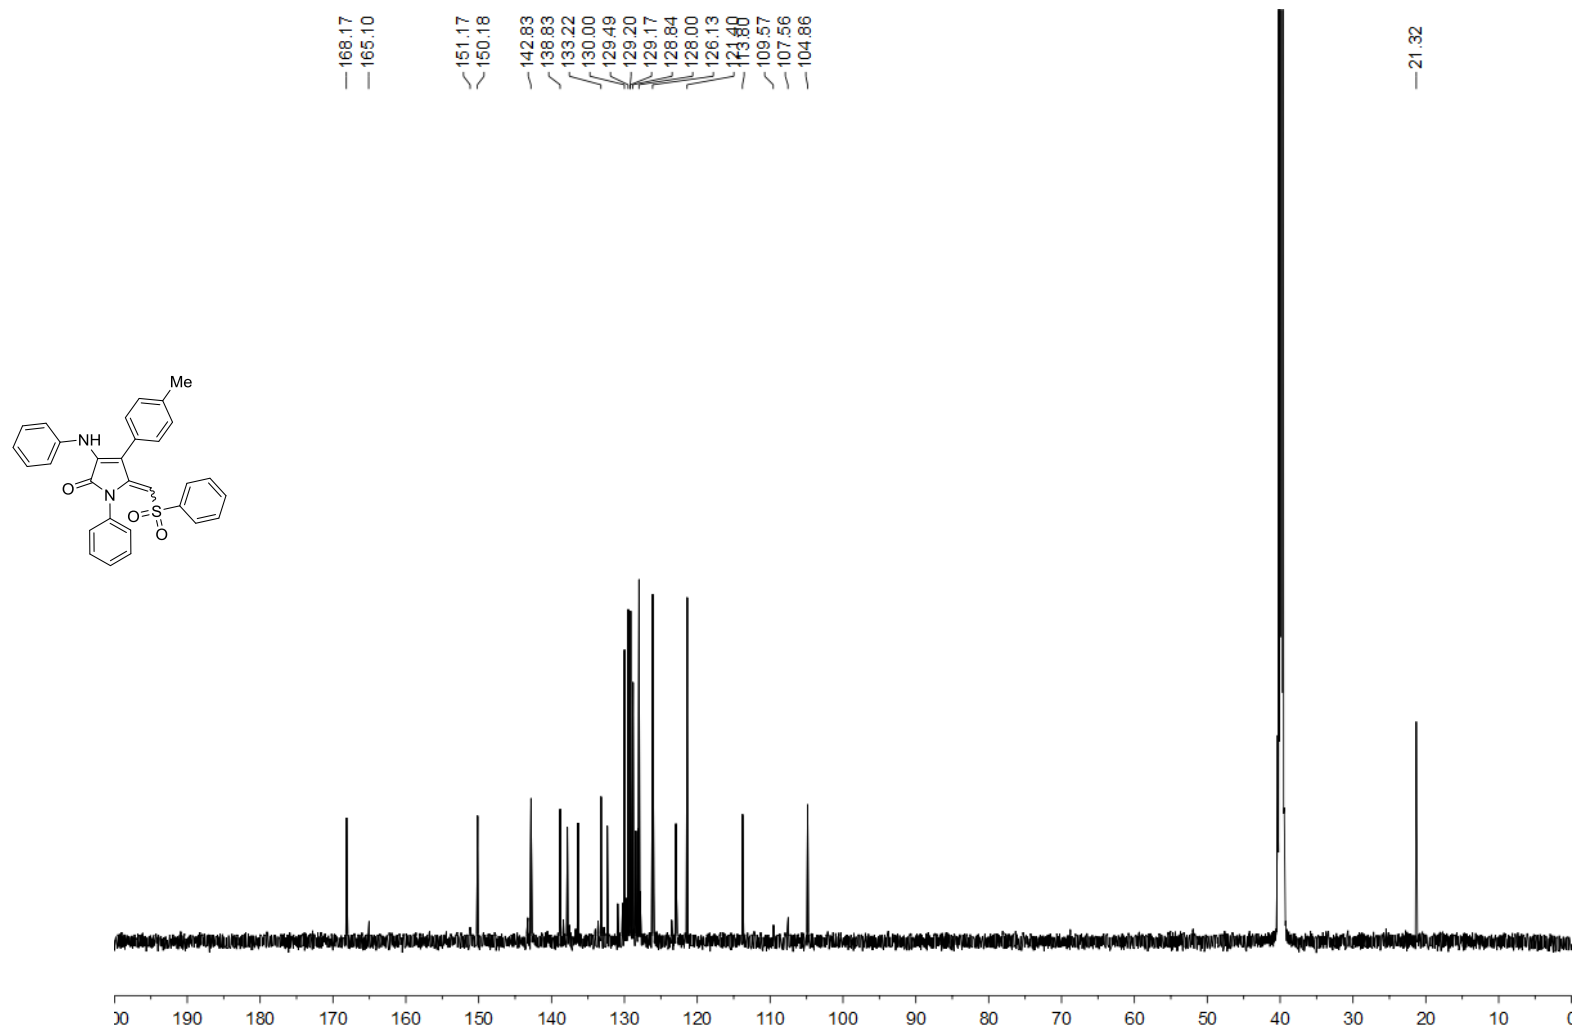

**Figure S87.**  $^{13}\text{C}$  NMR (150 MHz,  $\text{DMSO-}d_6$ ) spectra of compound **7b**

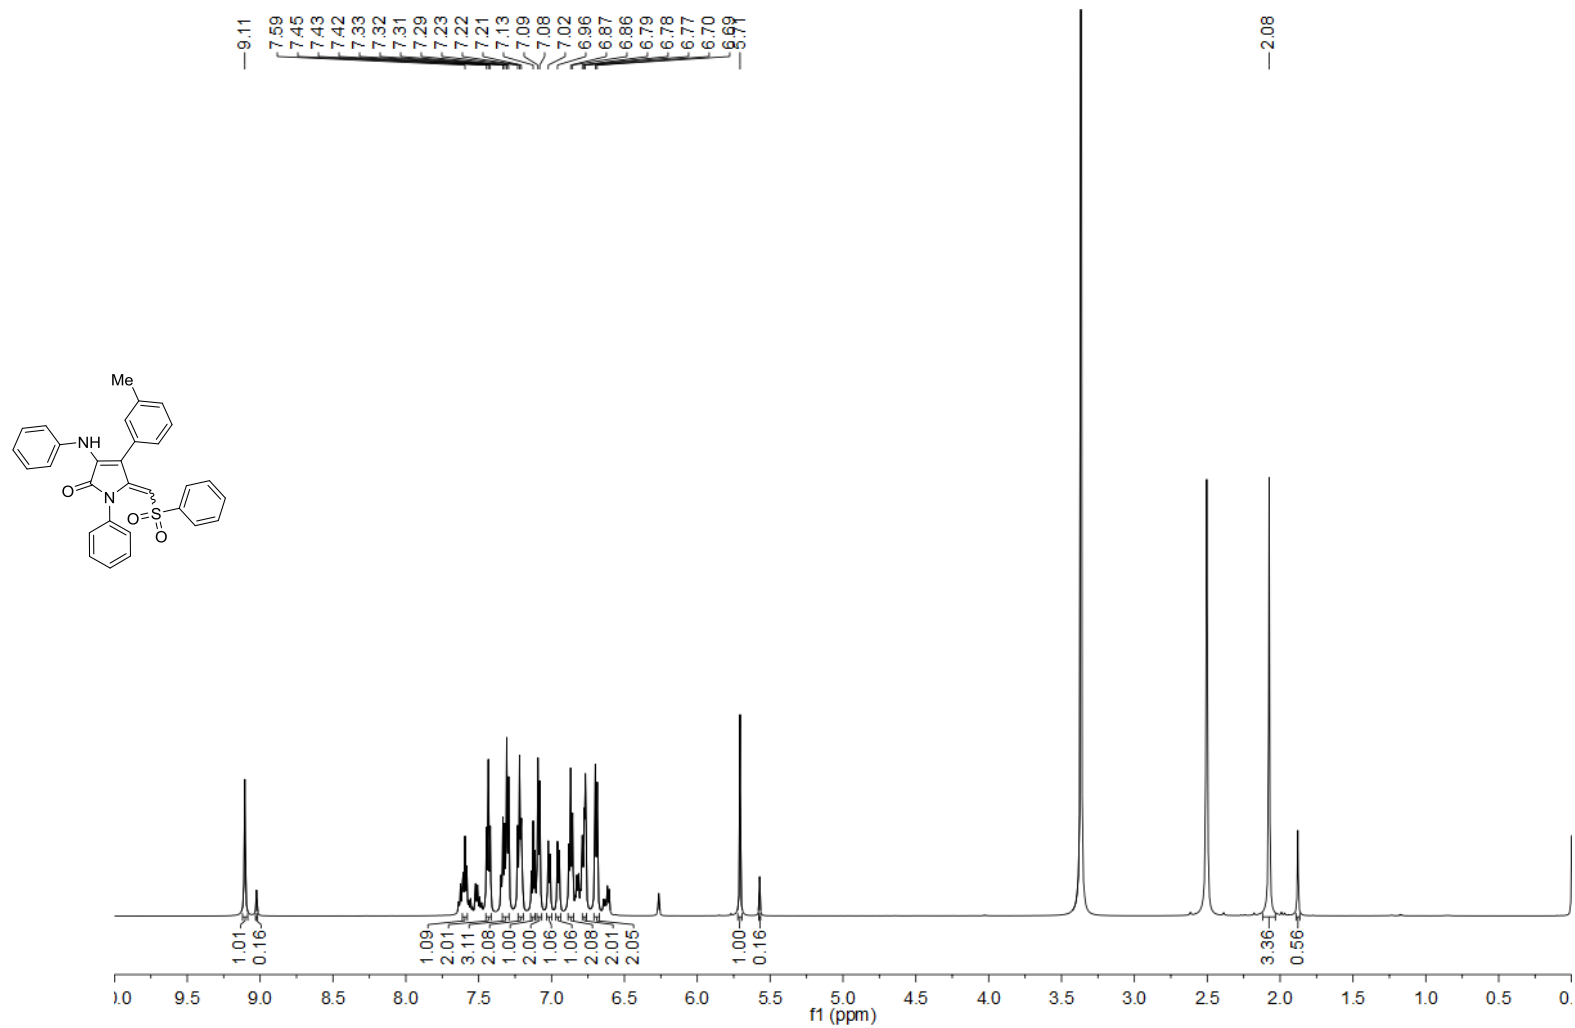

**Figure S88.** <sup>1</sup>H NMR (600 MHz, DMSO-*d*<sub>6</sub>) spectra of compound **7c**

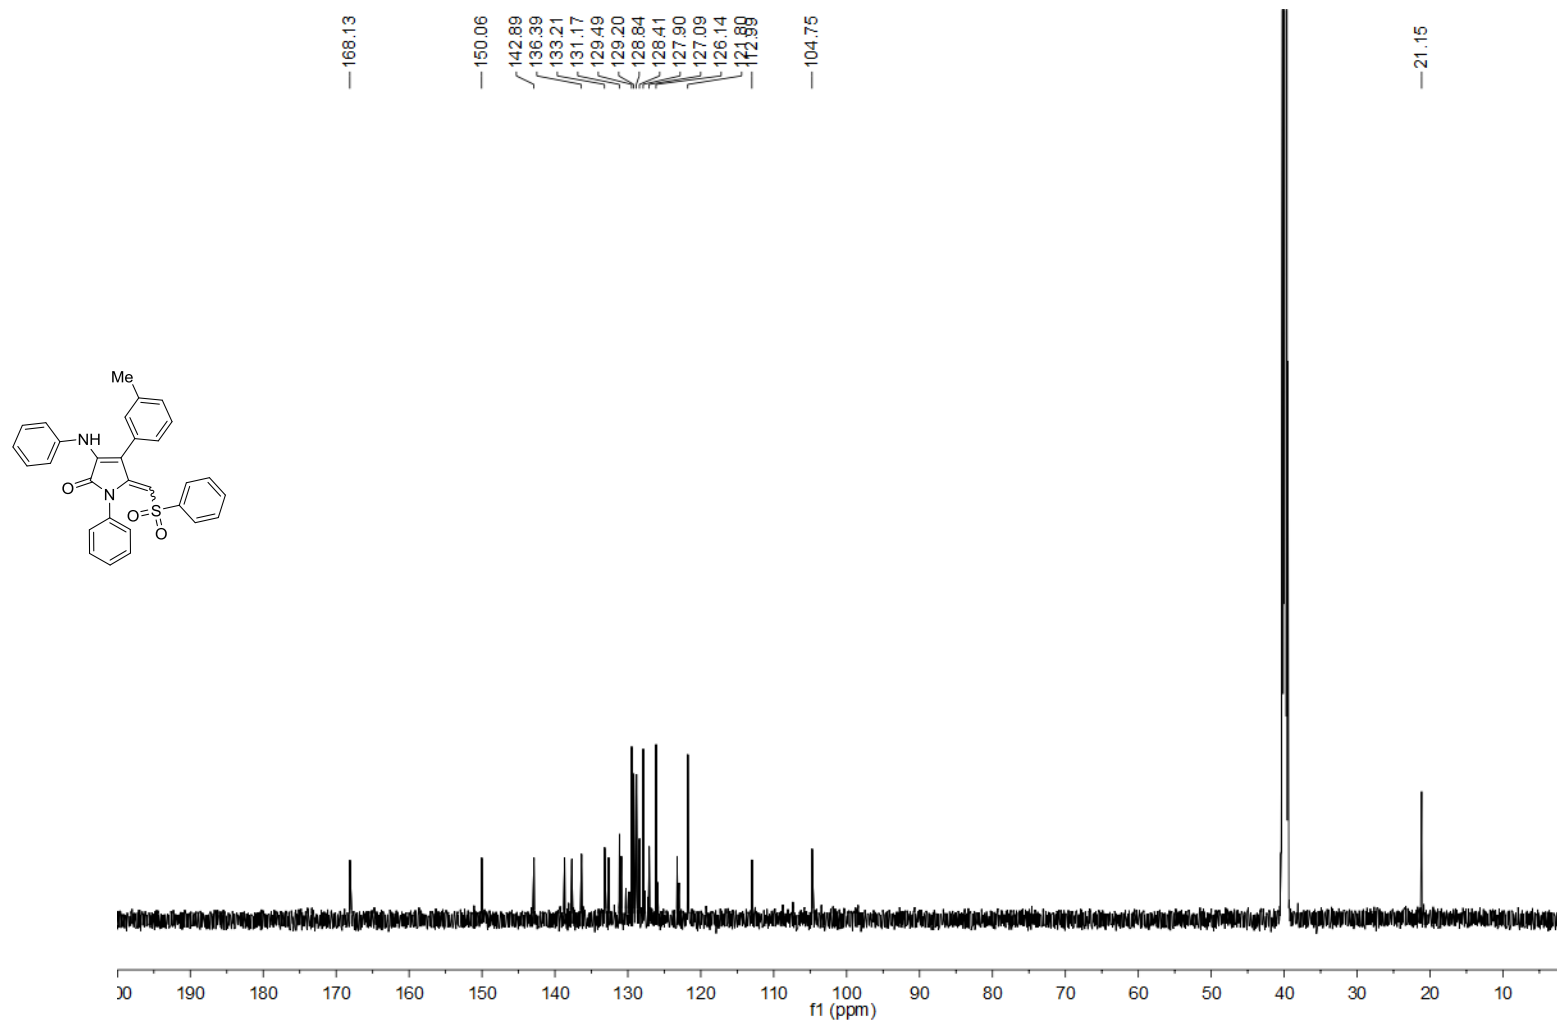

**Figure S89.** <sup>13</sup>C NMR (150 MHz, DMSO-*d*<sub>6</sub>) spectra of compound **7c**

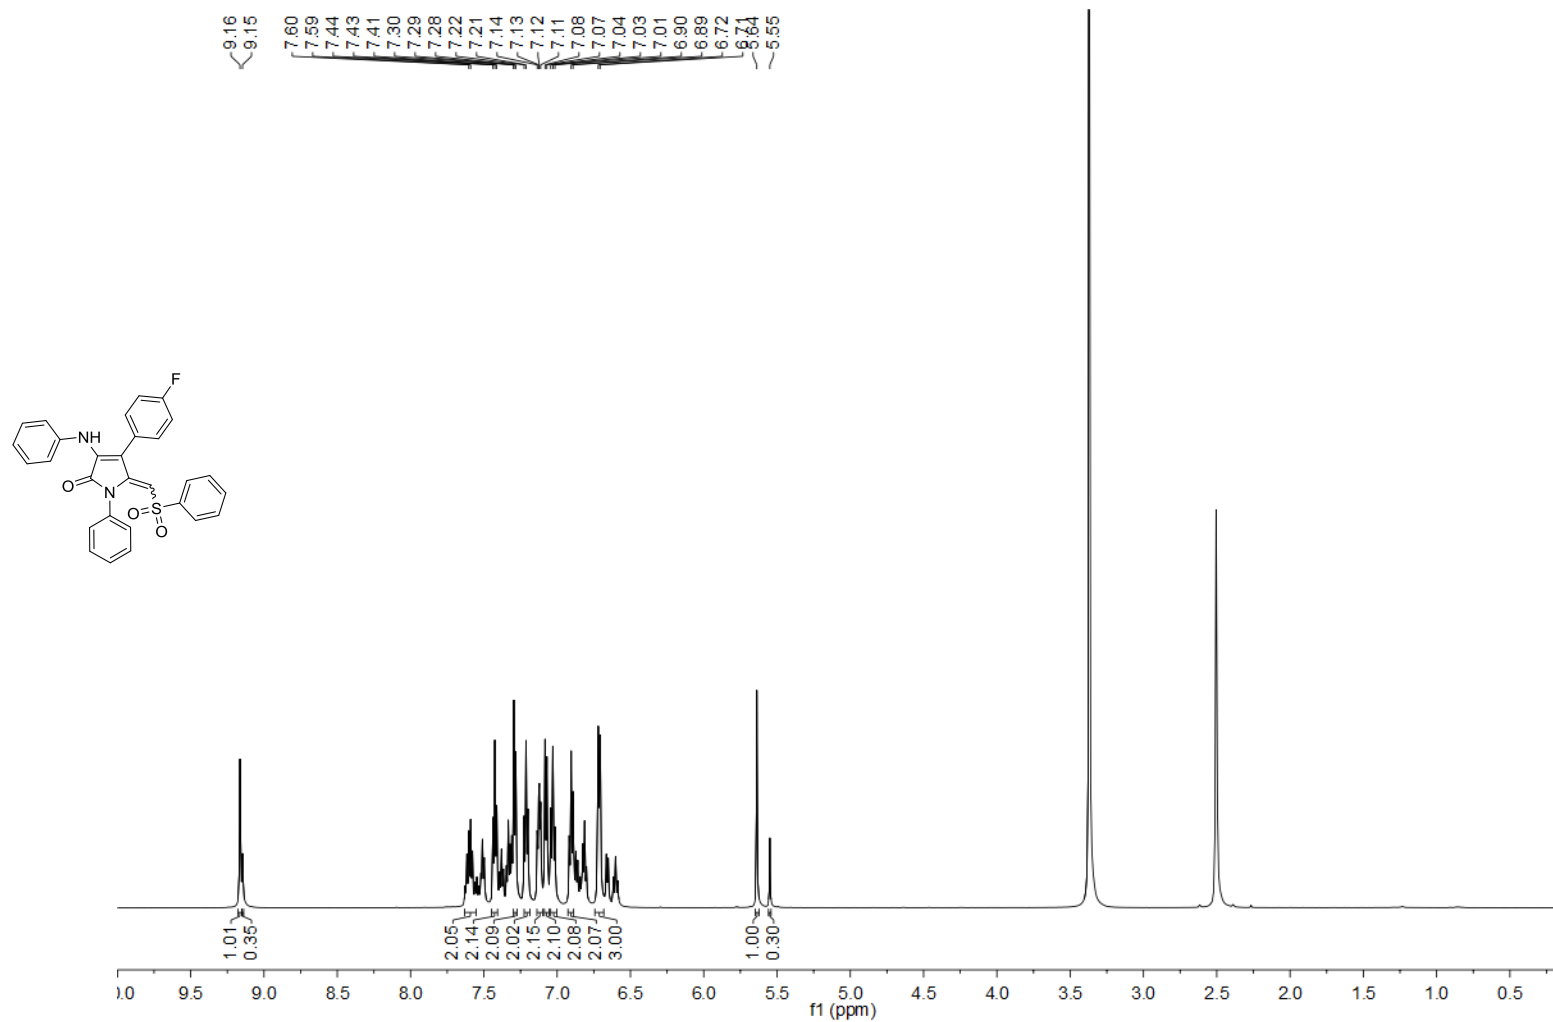

Figure S90. <sup>1</sup>H NMR (600 MHz, DMSO-*d*<sub>6</sub>) spectra of compound 7d

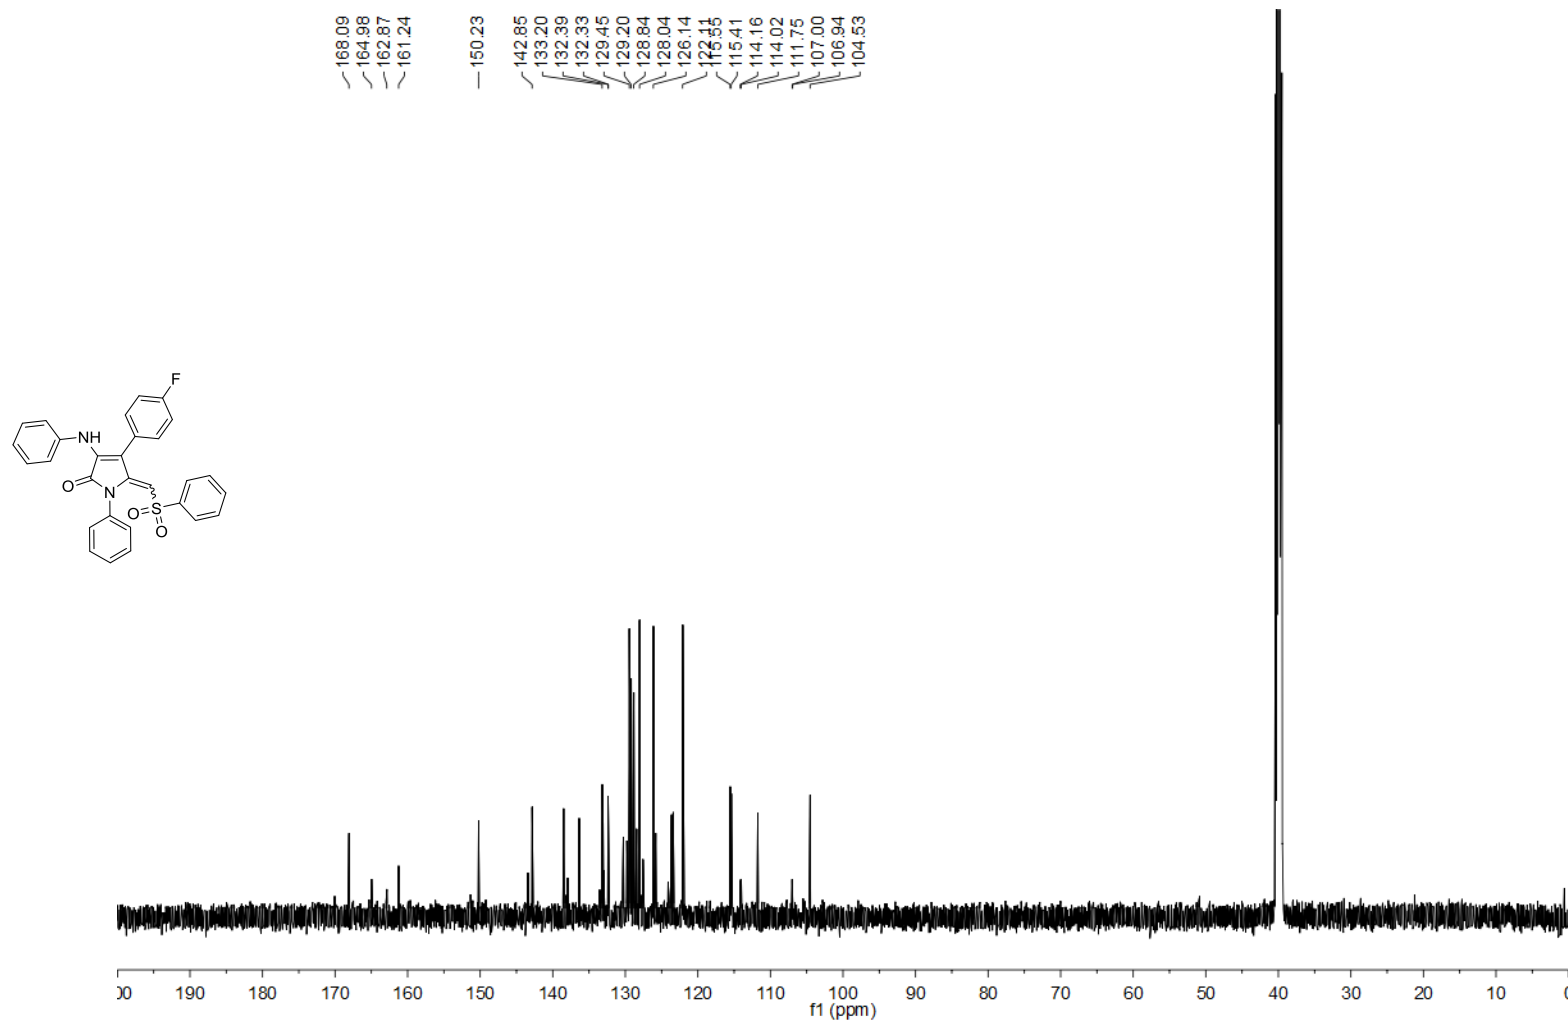

Figure S91. <sup>13</sup>C NMR (150 MHz, DMSO-*d*<sub>6</sub>) spectra of compound 7d

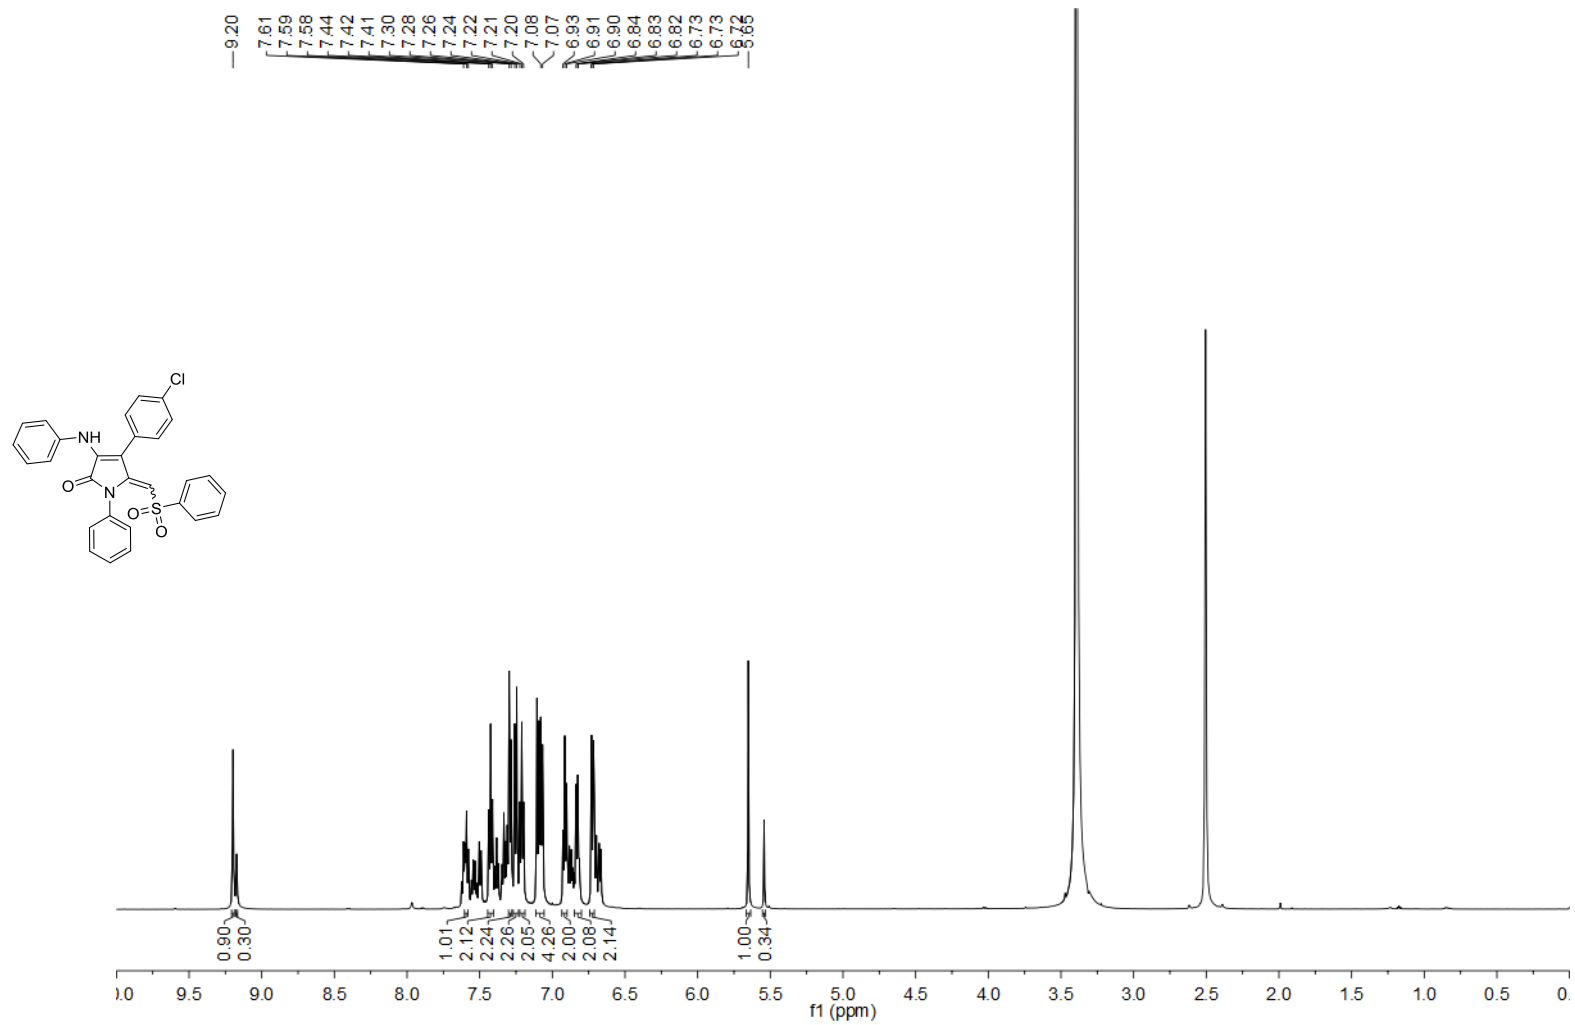

Figure S92. <sup>1</sup>H NMR (600 MHz, DMSO-*d*<sub>6</sub>) spectra of compound 7e



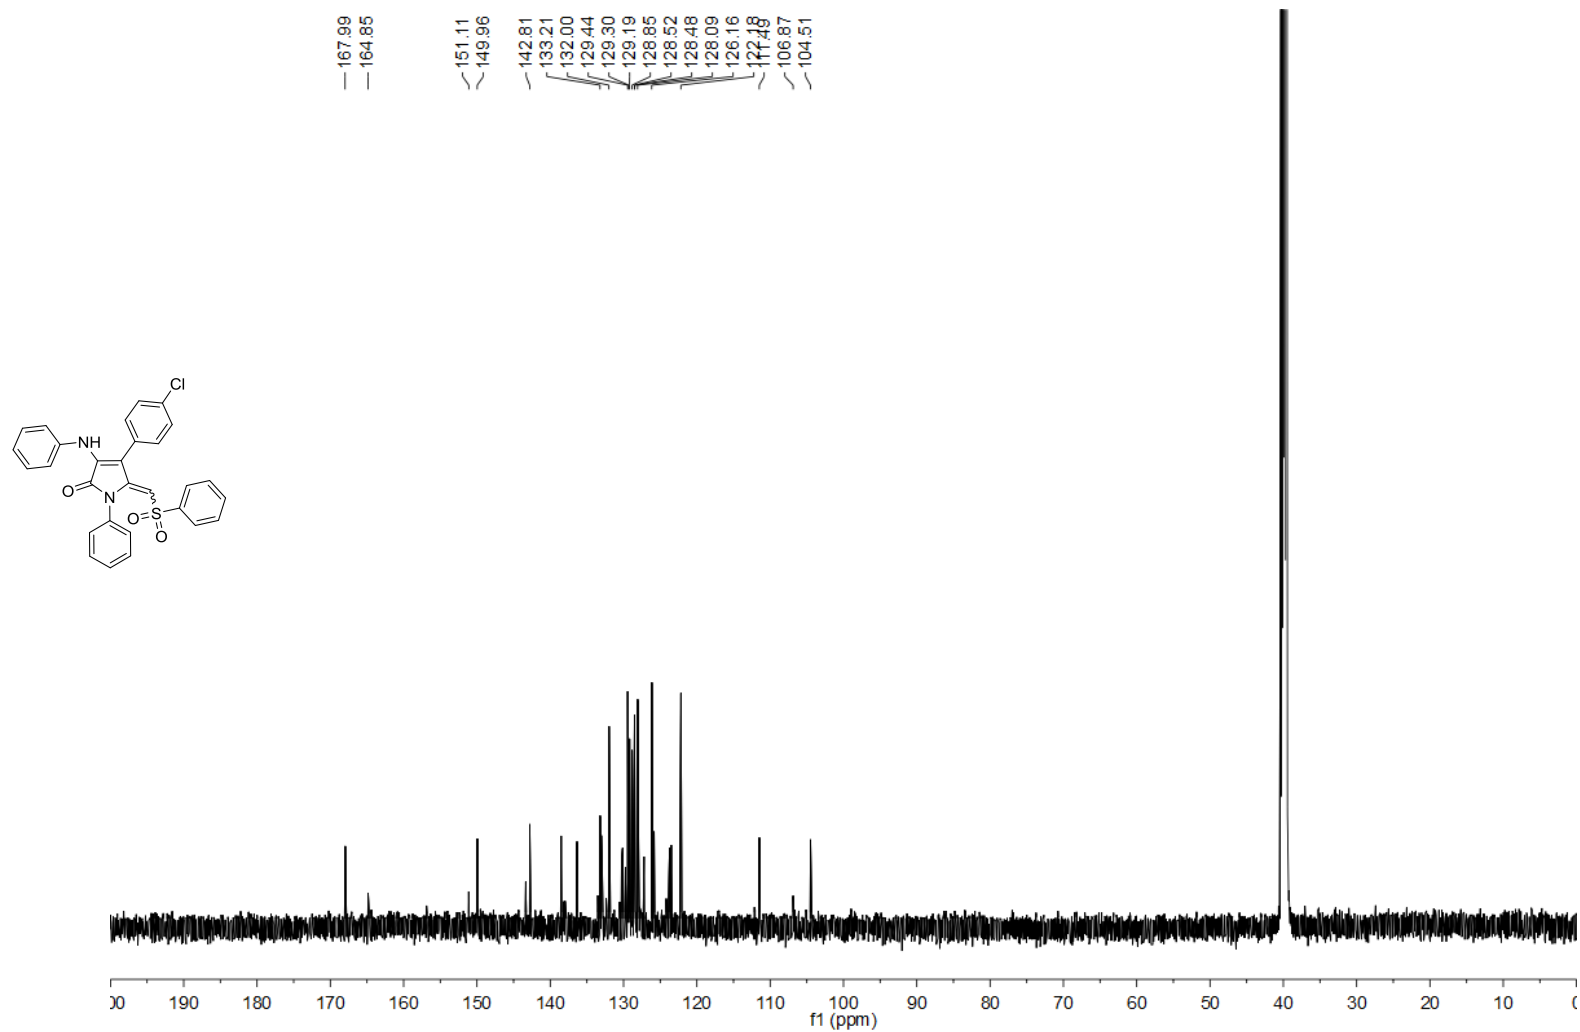

Figure S93. <sup>13</sup>C NMR (150 MHz, DMSO-*d*<sub>6</sub>) spectra of compound 7e

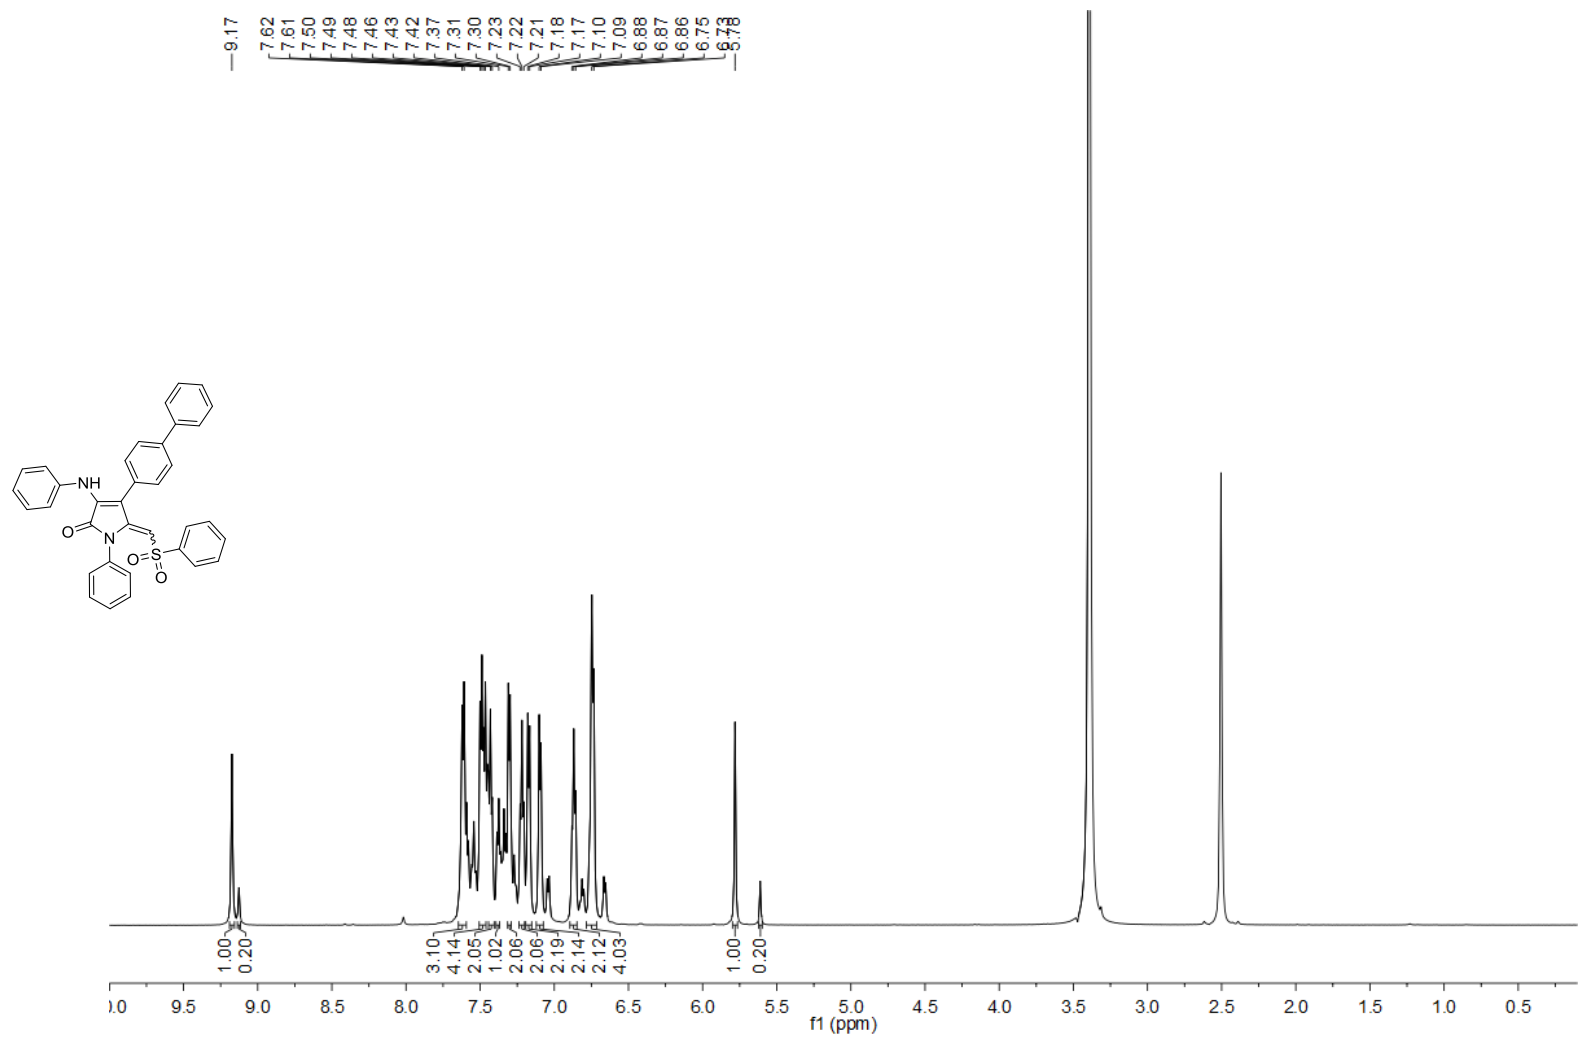

Figure S94. <sup>1</sup>H NMR (600 MHz, DMSO-*d*<sub>6</sub>) spectra of compound 7f

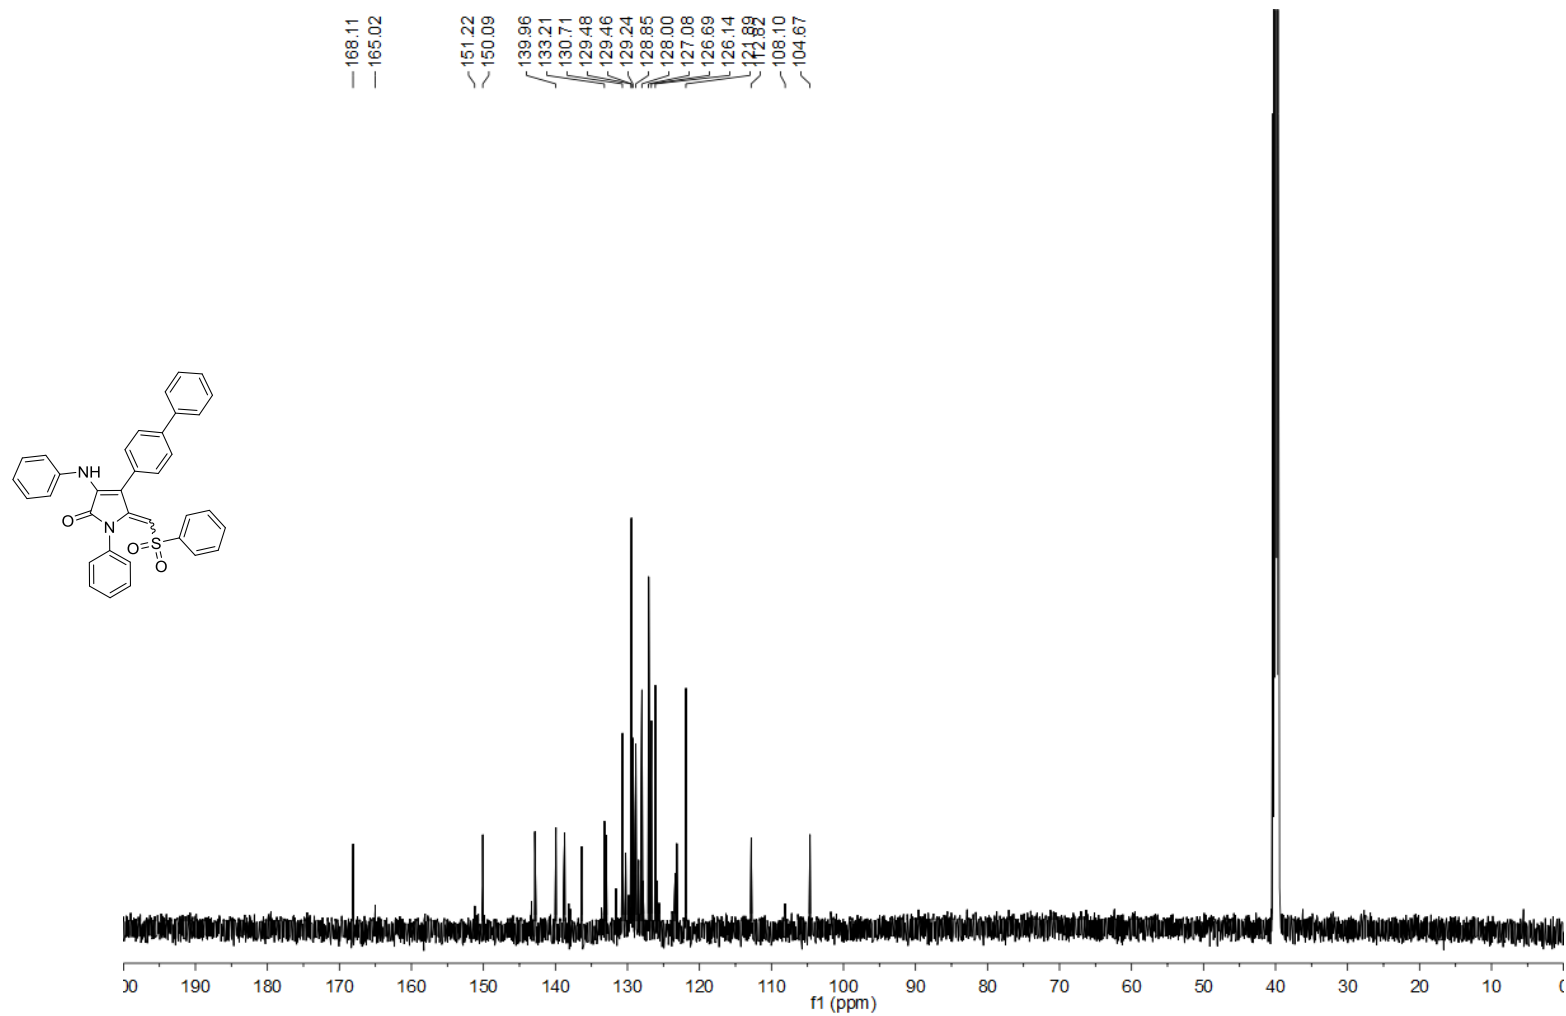

Figure S95. <sup>13</sup>C NMR (150 MHz, DMSO-*d*<sub>6</sub>) spectra of compound 7f

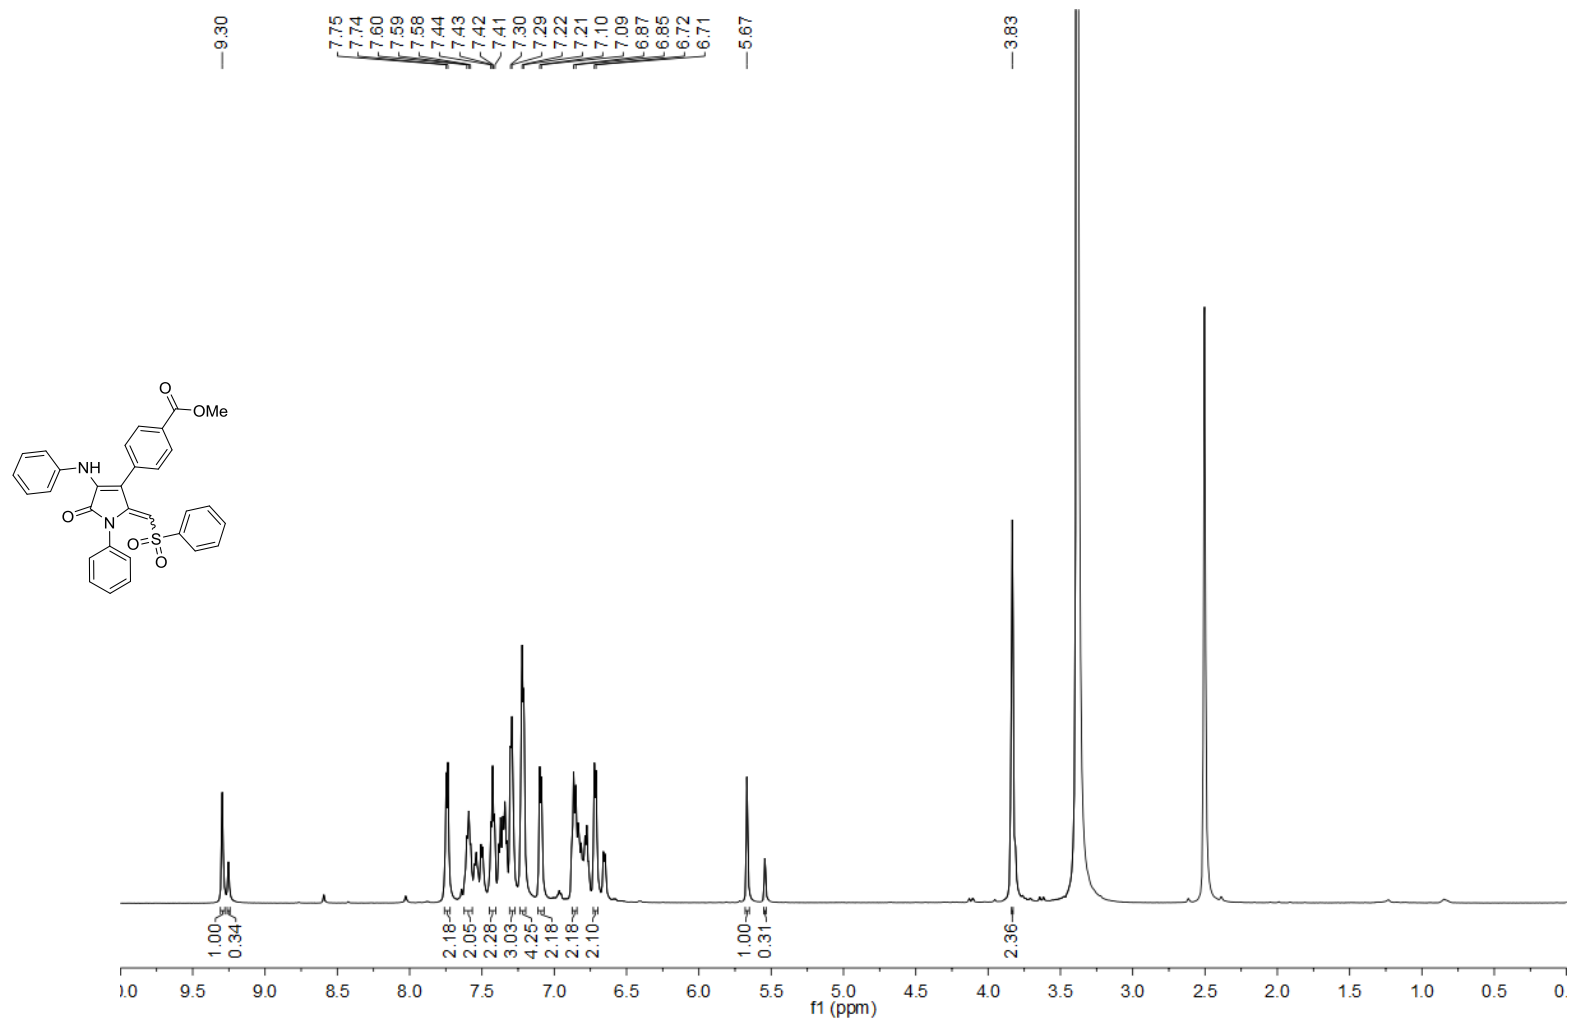

Figure S96. <sup>1</sup>H NMR (600 MHz, DMSO-*d*<sub>6</sub>) spectra of compound 7g

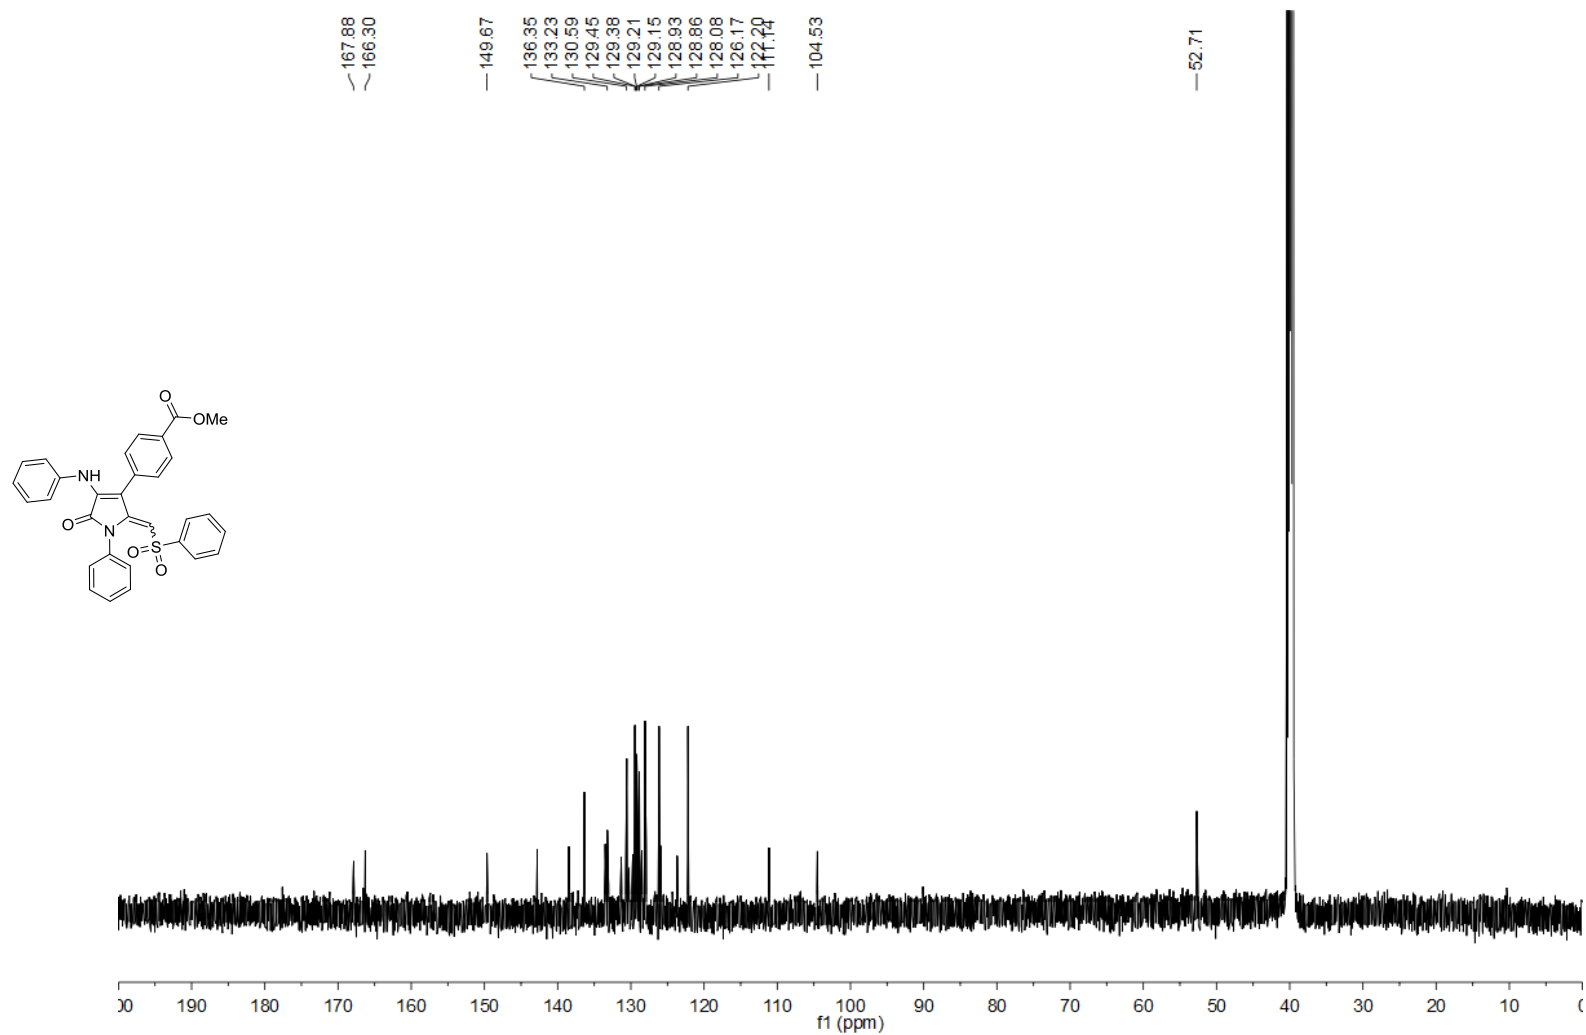

**Figure S97.**  $^{13}\text{C}$  NMR (150 MHz,  $\text{DMSO-}d_6$ ) spectra of compound **7g**

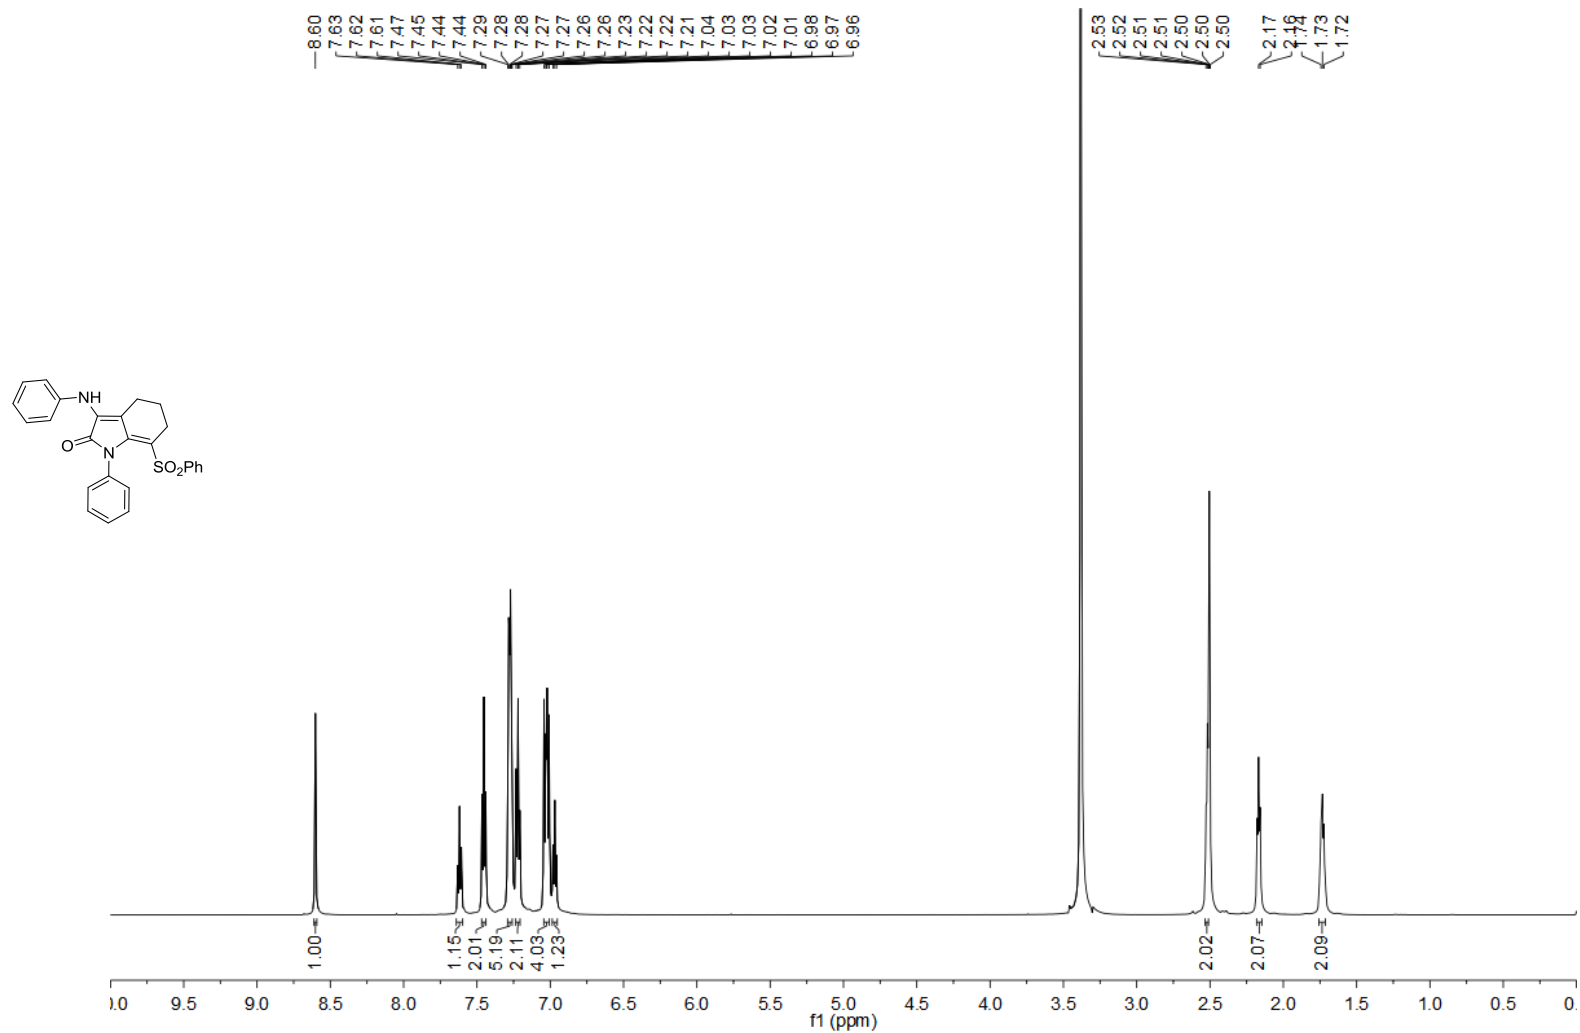

Figure S98. <sup>1</sup>H NMR (600 MHz, DMSO-*d*<sub>6</sub>) spectra of compound **8a**

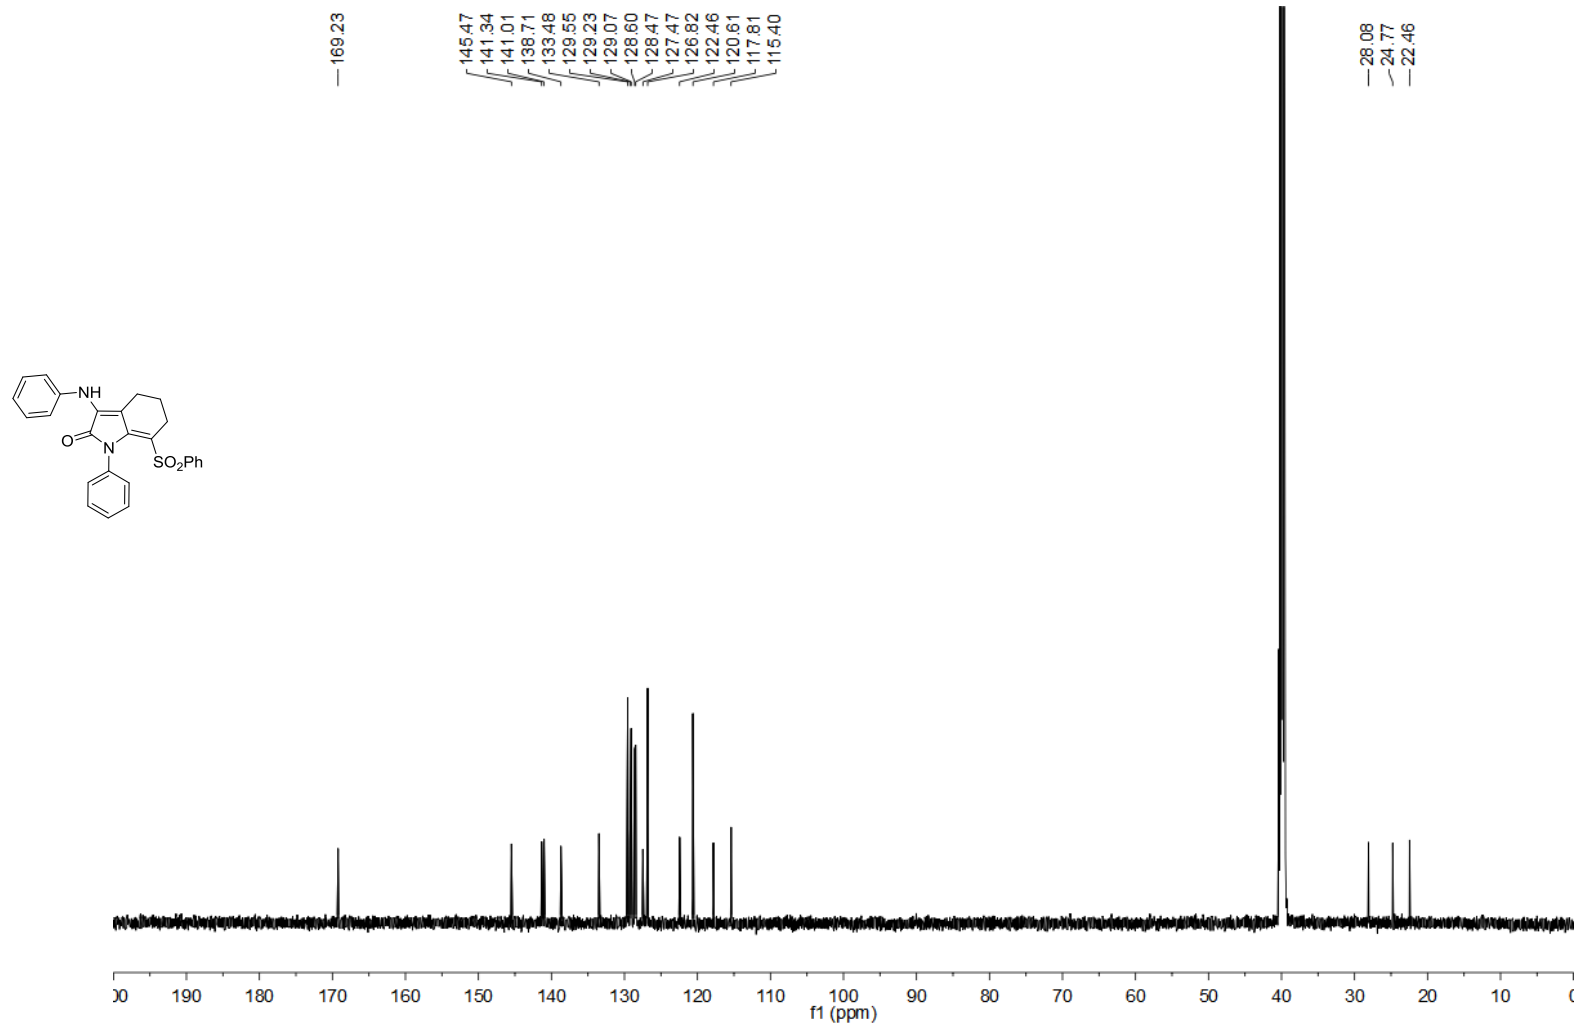

**Figure S99.** <sup>13</sup>C NMR (150 MHz, DMSO-*d*<sub>6</sub>) spectra of compound **8a**

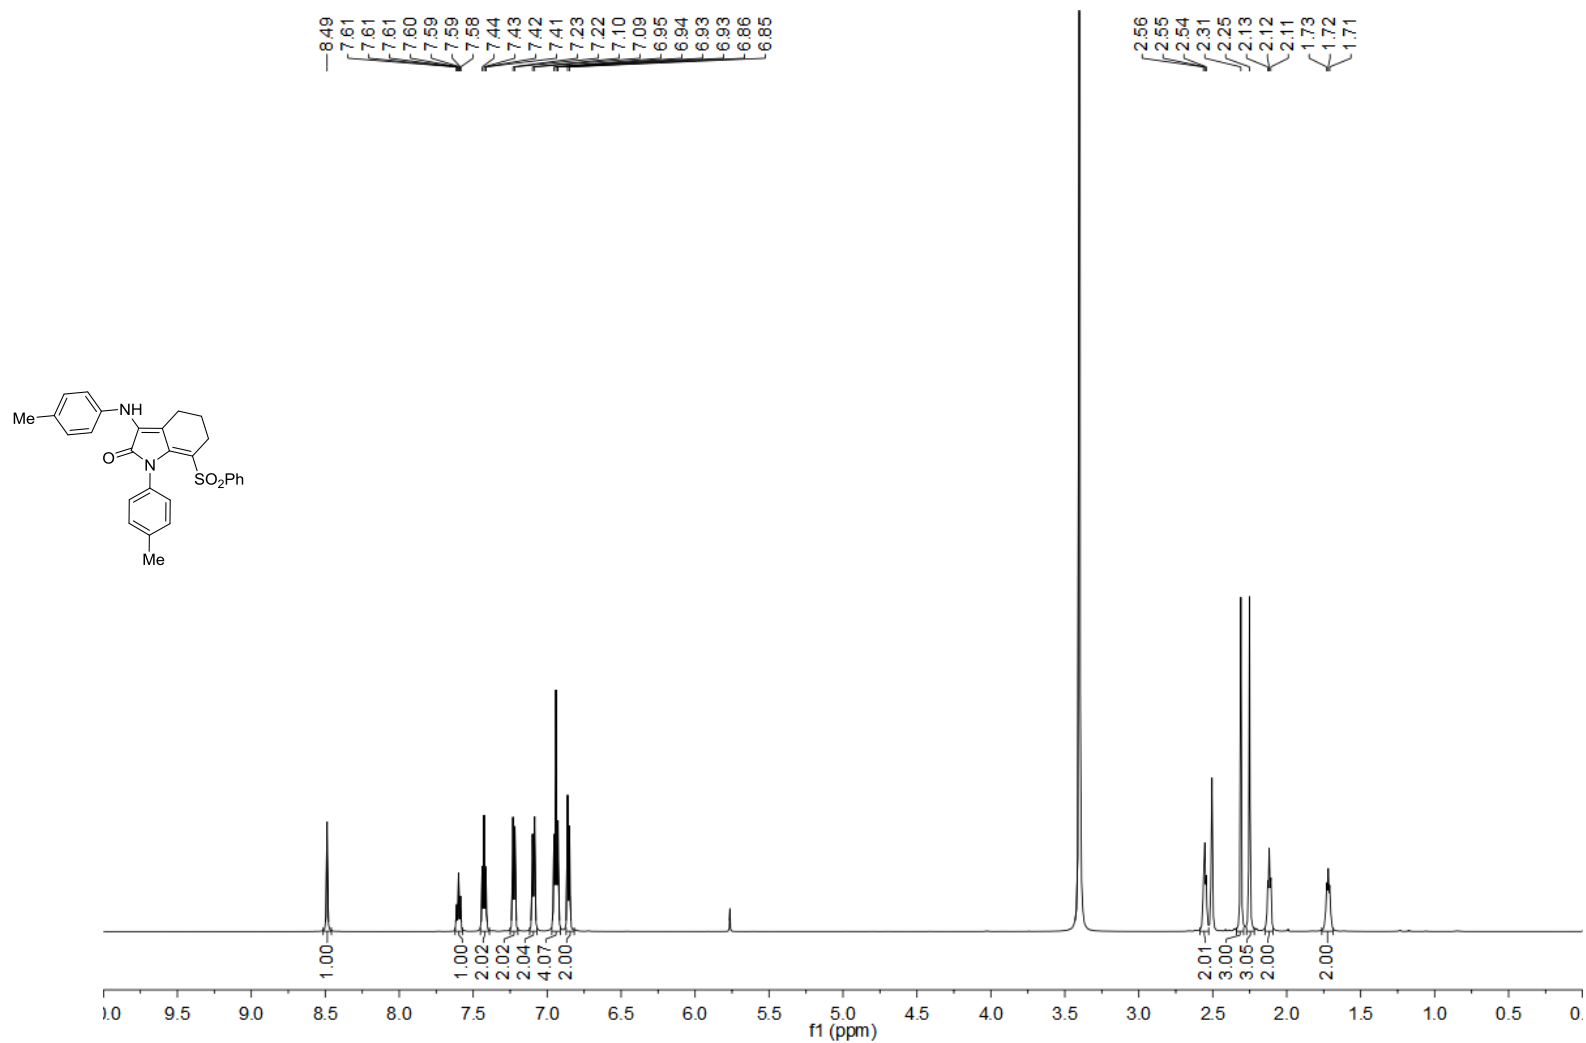

Figure S100. <sup>1</sup>H NMR (600 MHz, DMSO-*d*<sub>6</sub>) spectra of compound **8b**



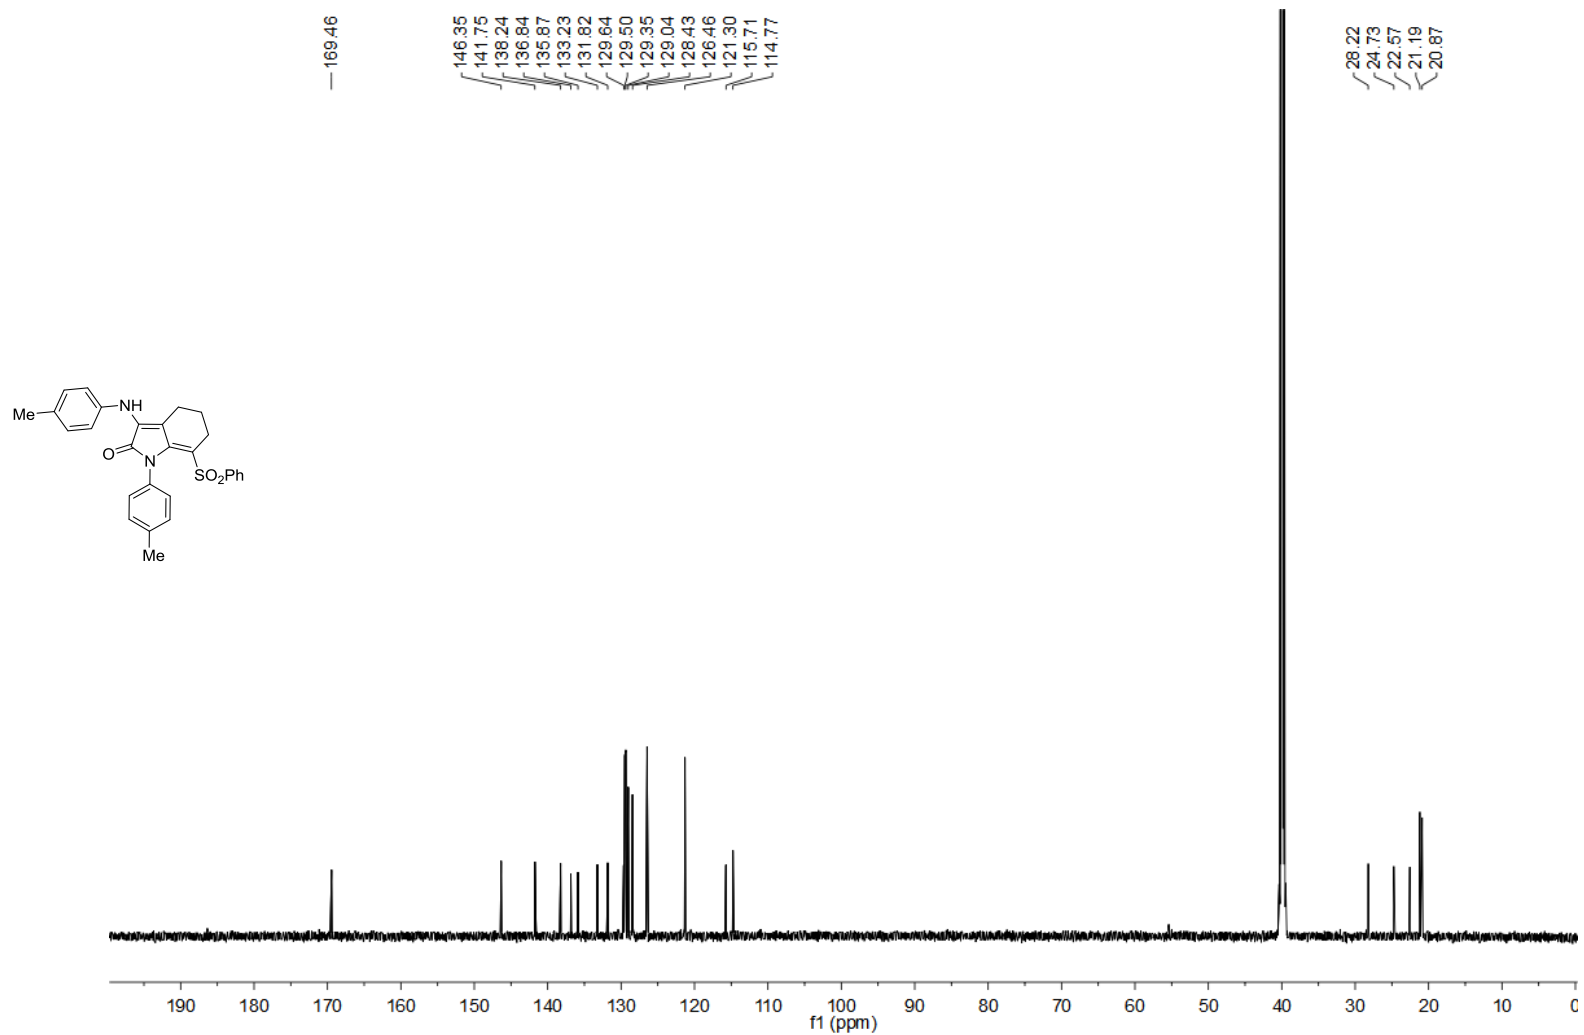

Figure S101.  $^{13}\text{C}$  NMR (150 MHz,  $\text{DMSO-}d_6$ ) spectra of compound **8b**

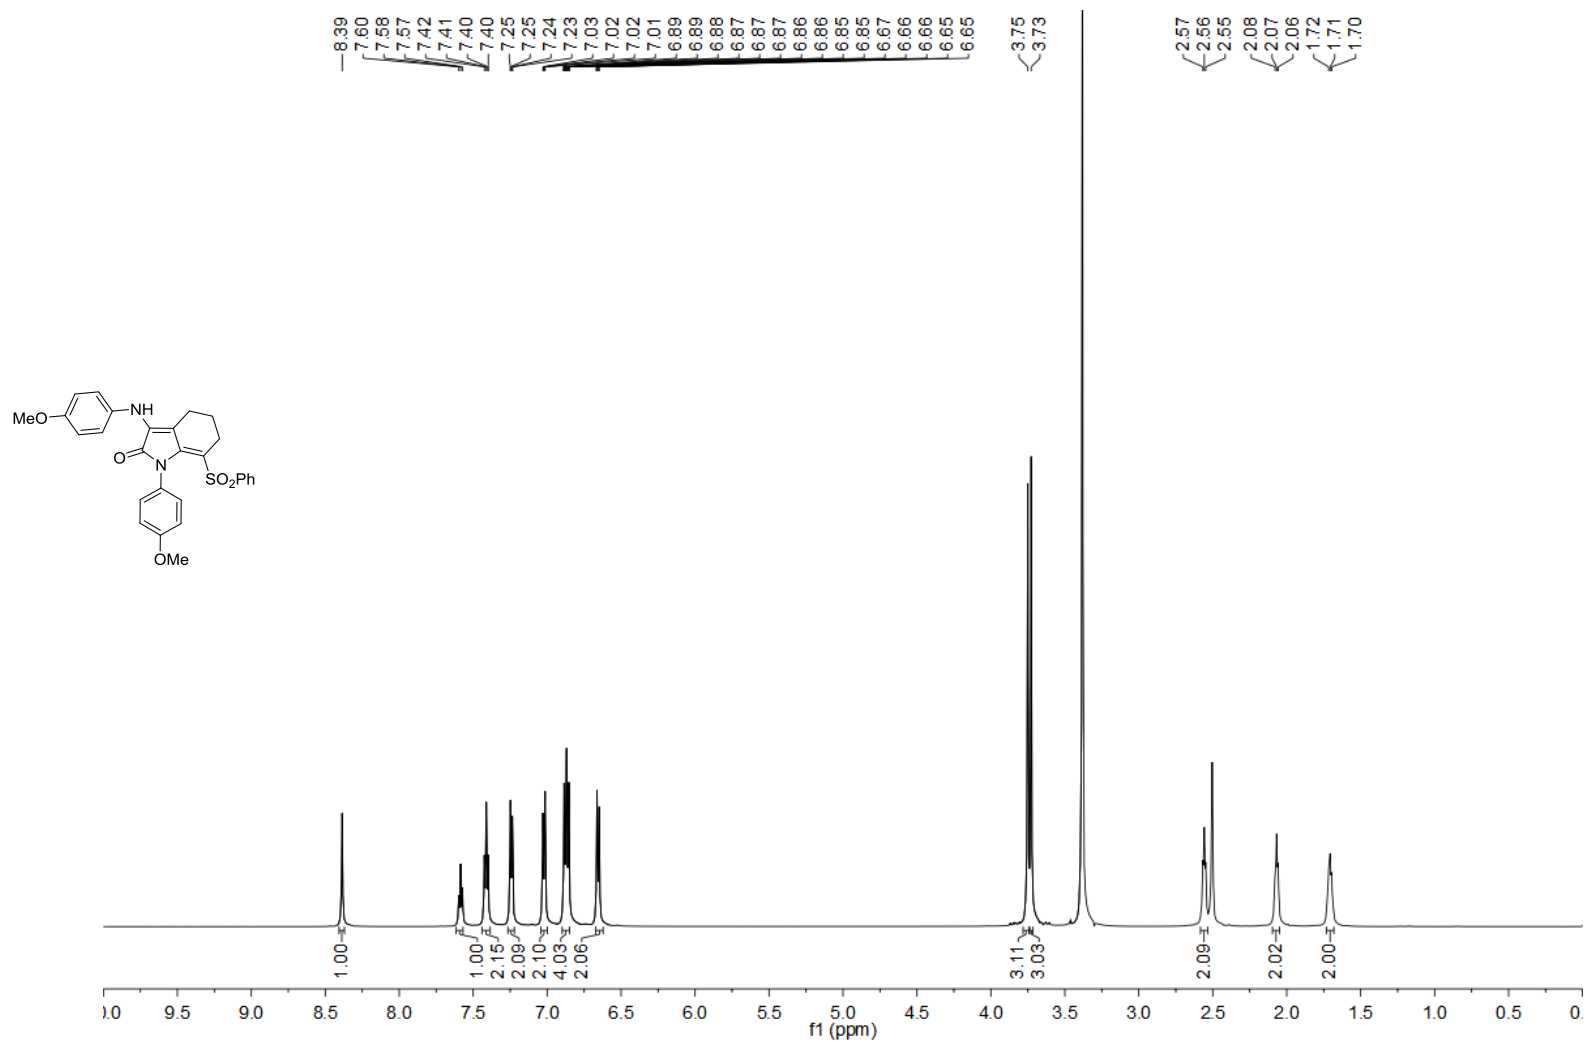

**Figure S102.** <sup>1</sup>H NMR (600 MHz, DMSO-*d*<sub>6</sub>) spectra of compound **8c**

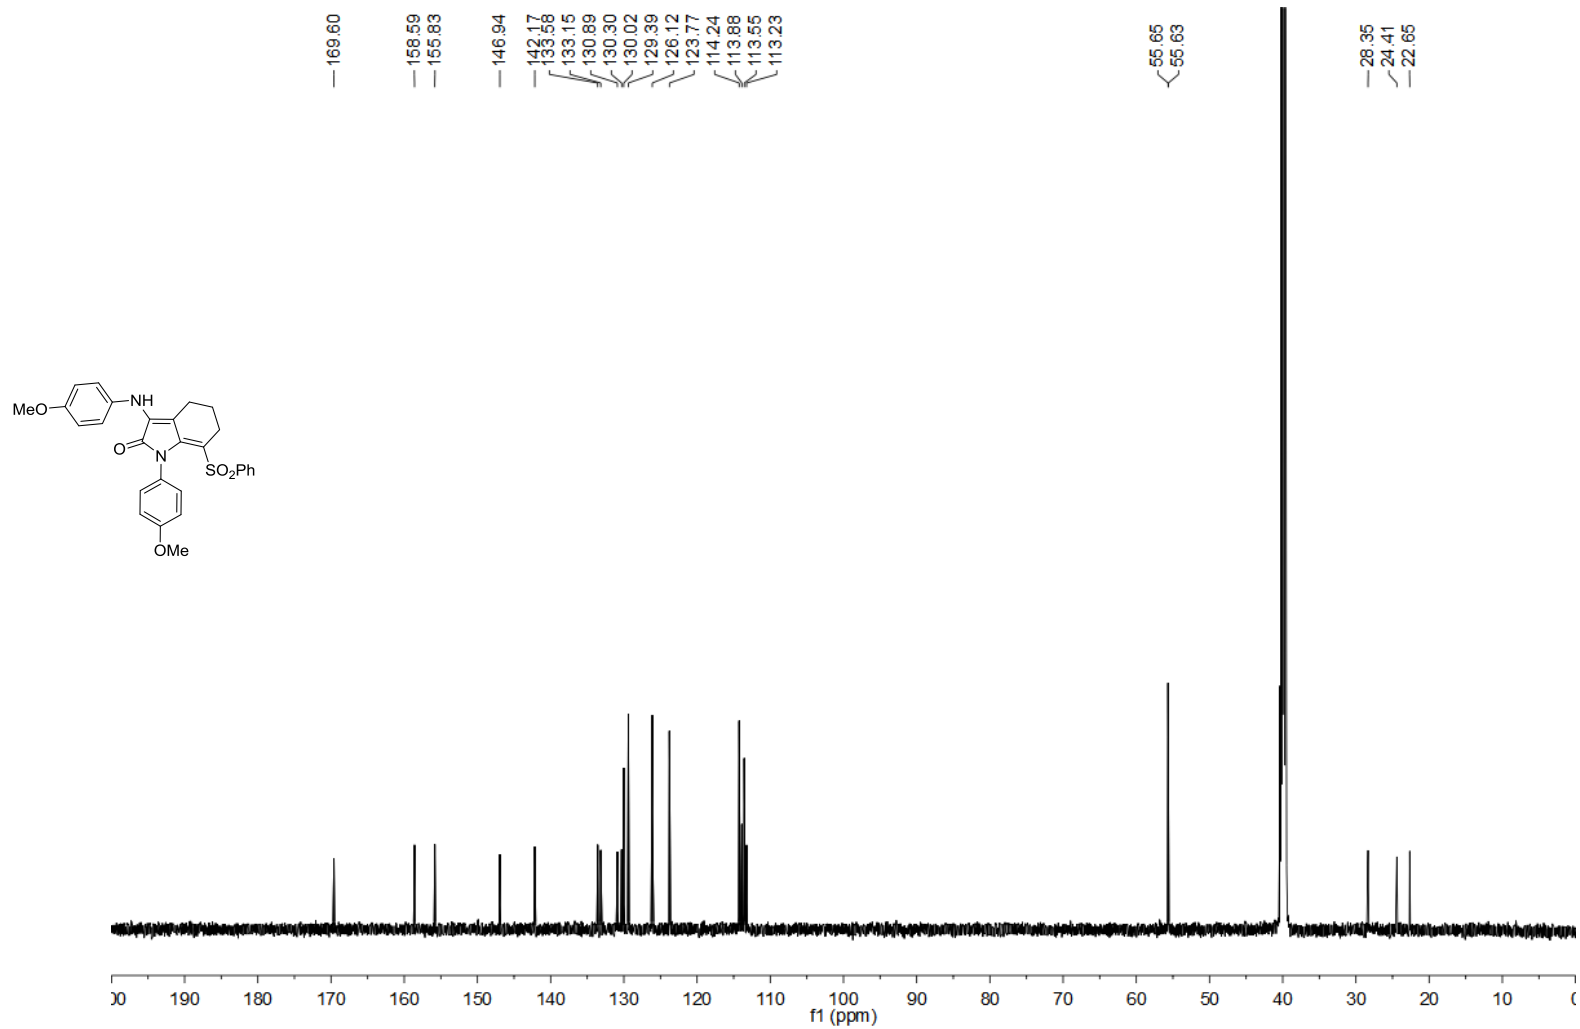

Figure S103. <sup>13</sup>C NMR (150 MHz, DMSO-*d*<sub>6</sub>) spectra of compound **8c**

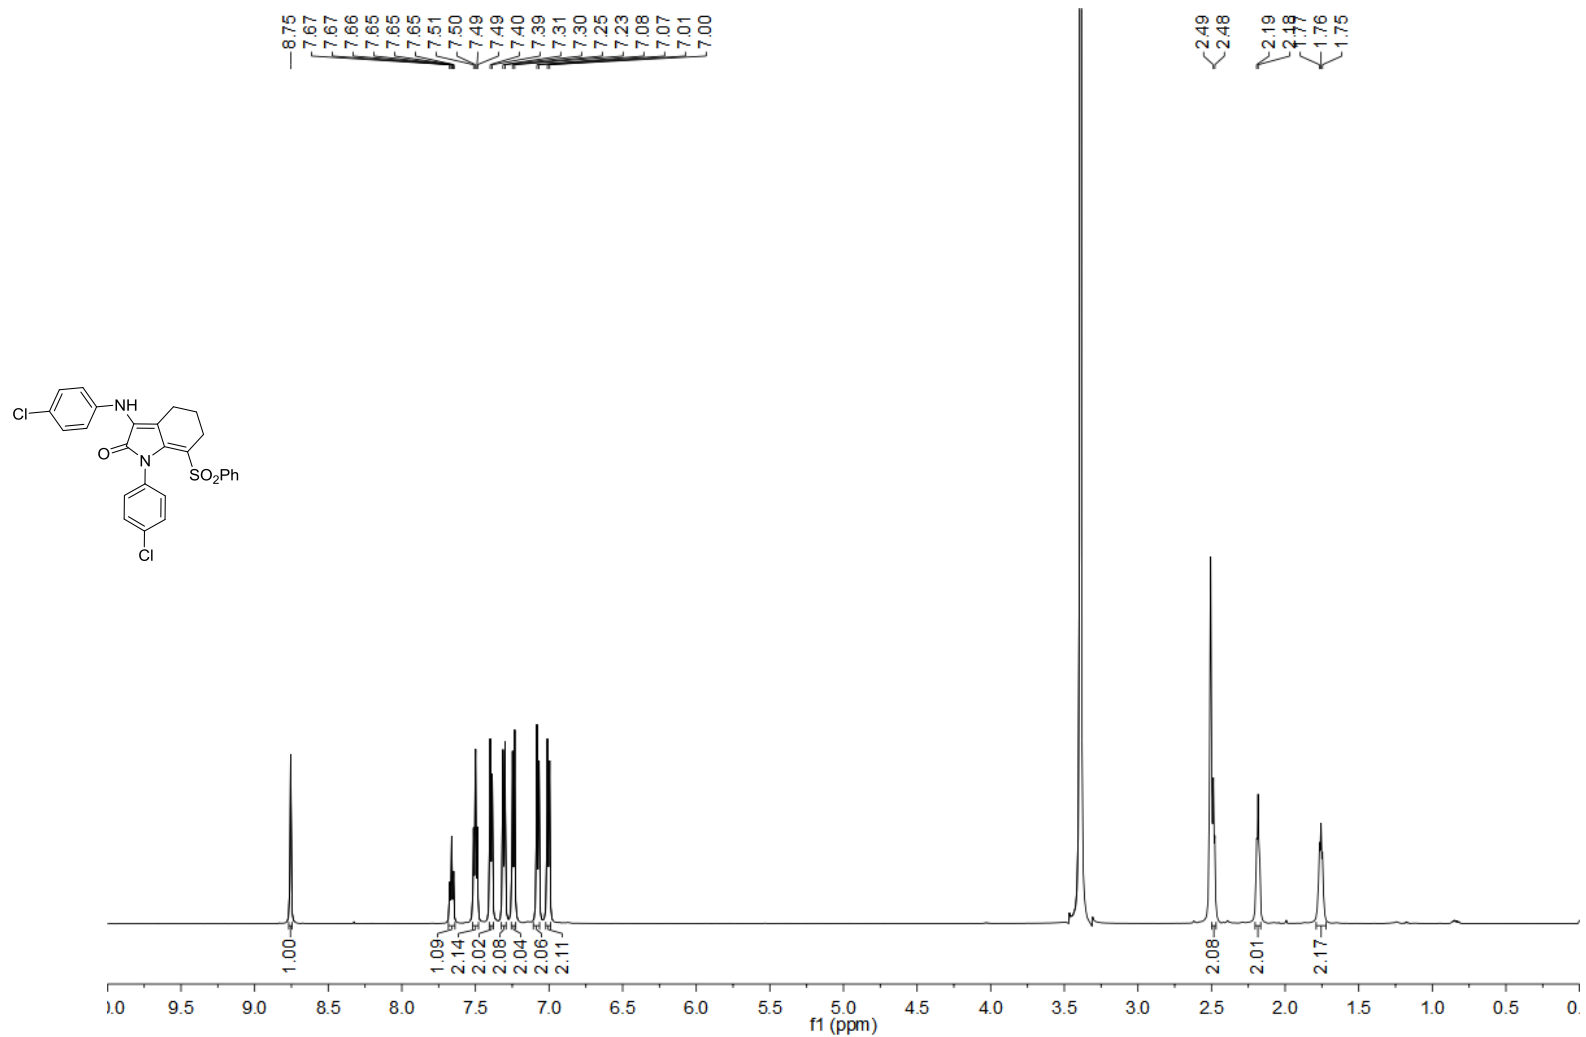

Figure S104. <sup>1</sup>H NMR (600 MHz, DMSO-*d*<sub>6</sub>) spectra of compound **8d**

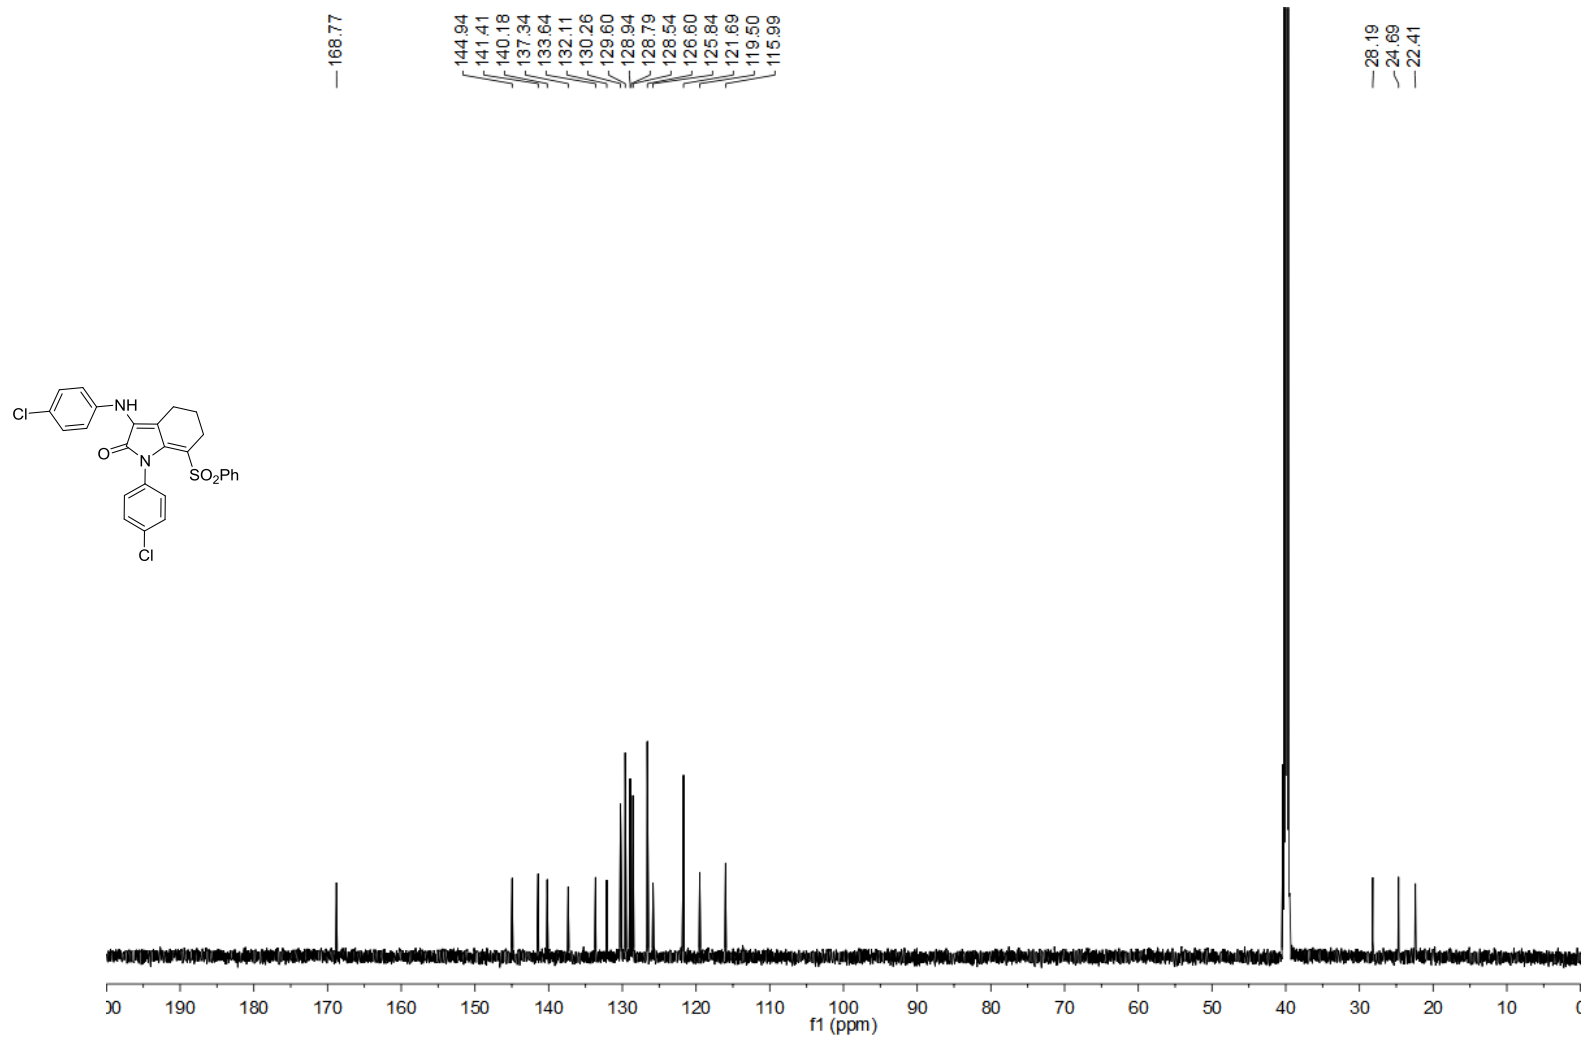

Figure S105. <sup>13</sup>C NMR (150 MHz, DMSO-*d*<sub>6</sub>) spectra of compound **8d**

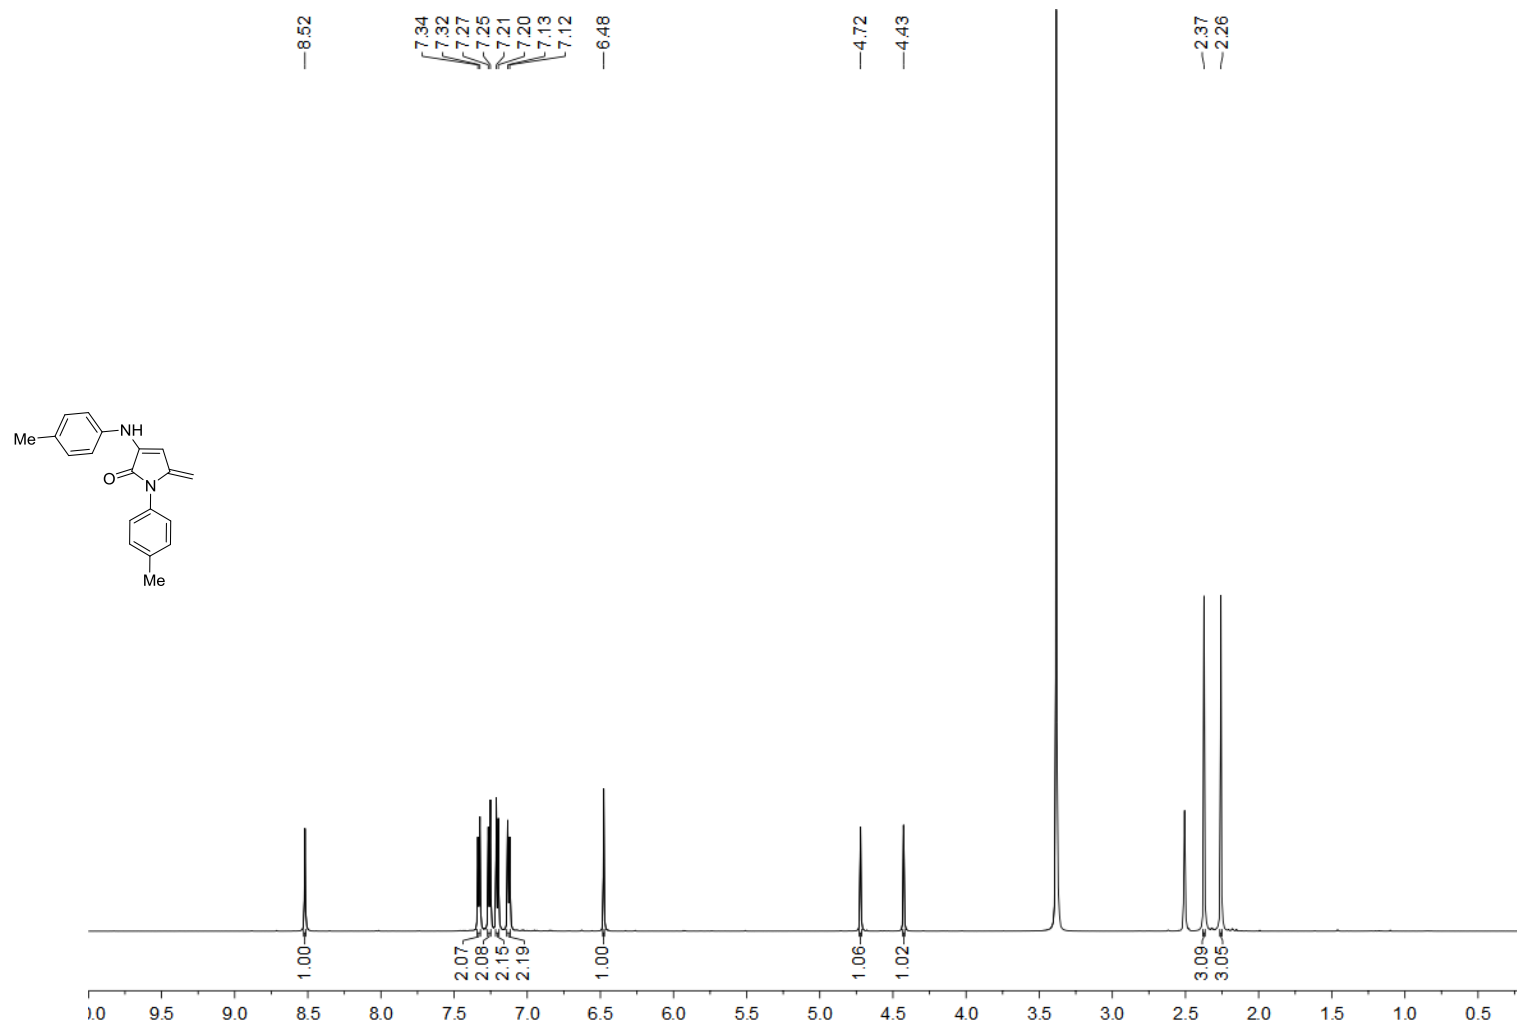

Figure S106. <sup>1</sup>H NMR (600 MHz, DMSO-*d*<sub>6</sub>) spectra of compound **10**

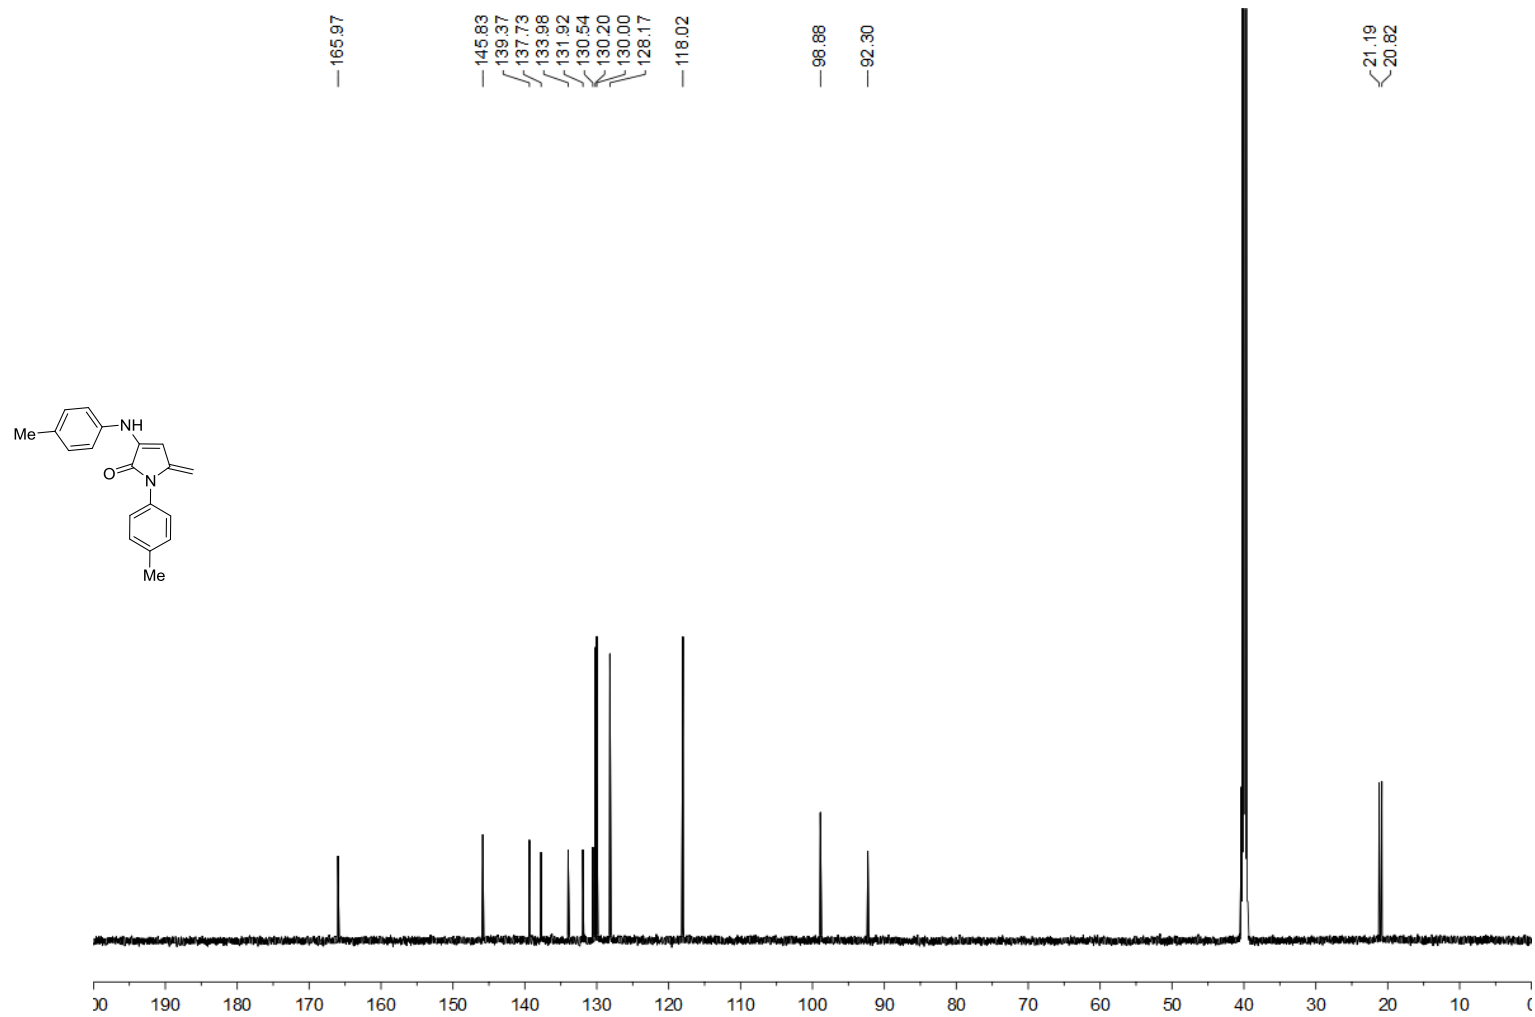

Figure S107.  $^{13}\text{C}$  NMR (150 MHz,  $\text{DMSO-}d_6$ ) spectra of compound **10**

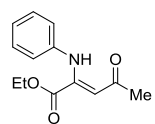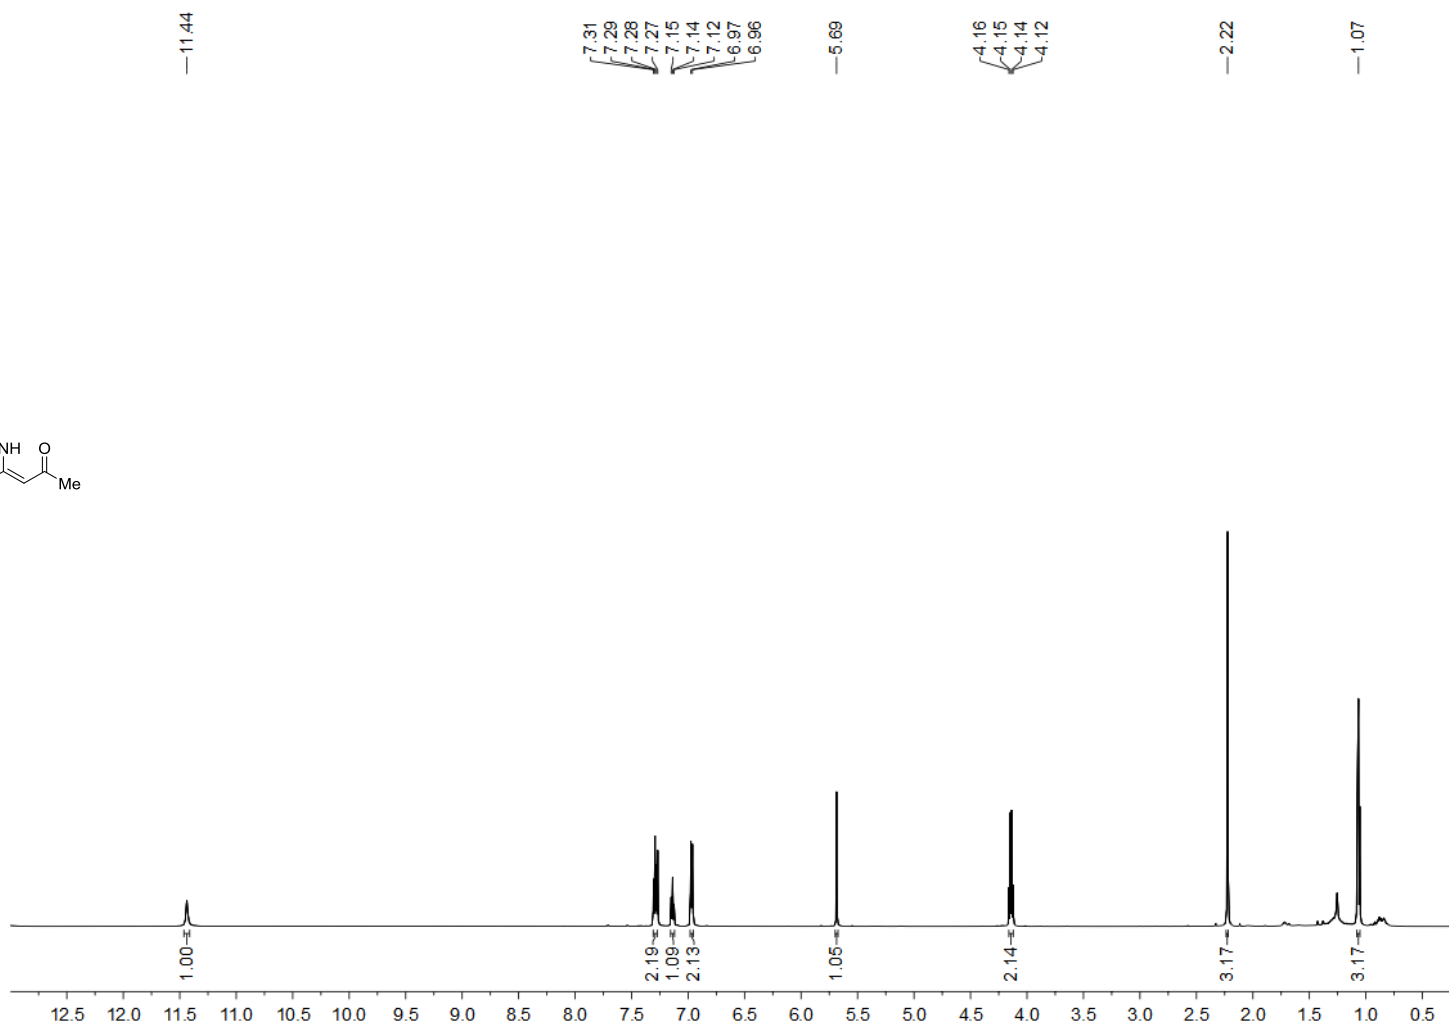

Figure S108.  $^1\text{H}$  NMR (600 MHz,  $\text{CDCl}_3$ ) spectra of compound **12**



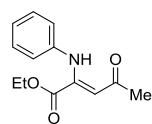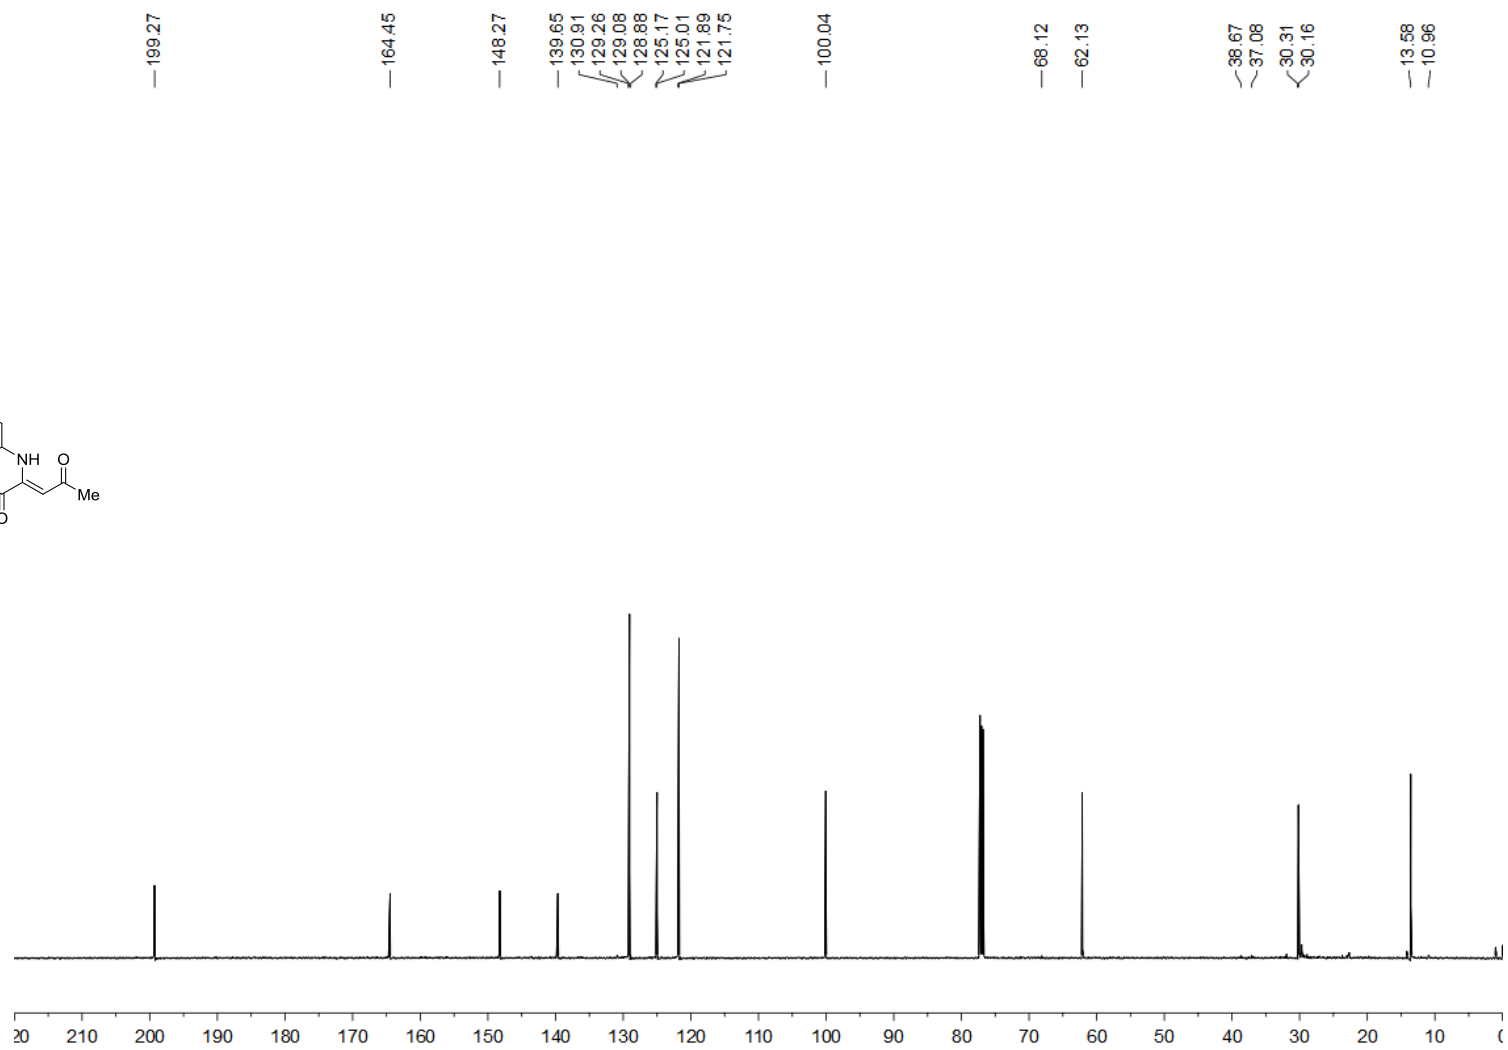

Figure S109.  $^{13}\text{C}$  NMR (150 MHz,  $\text{CDCl}_3$ ) spectra of compound **12**

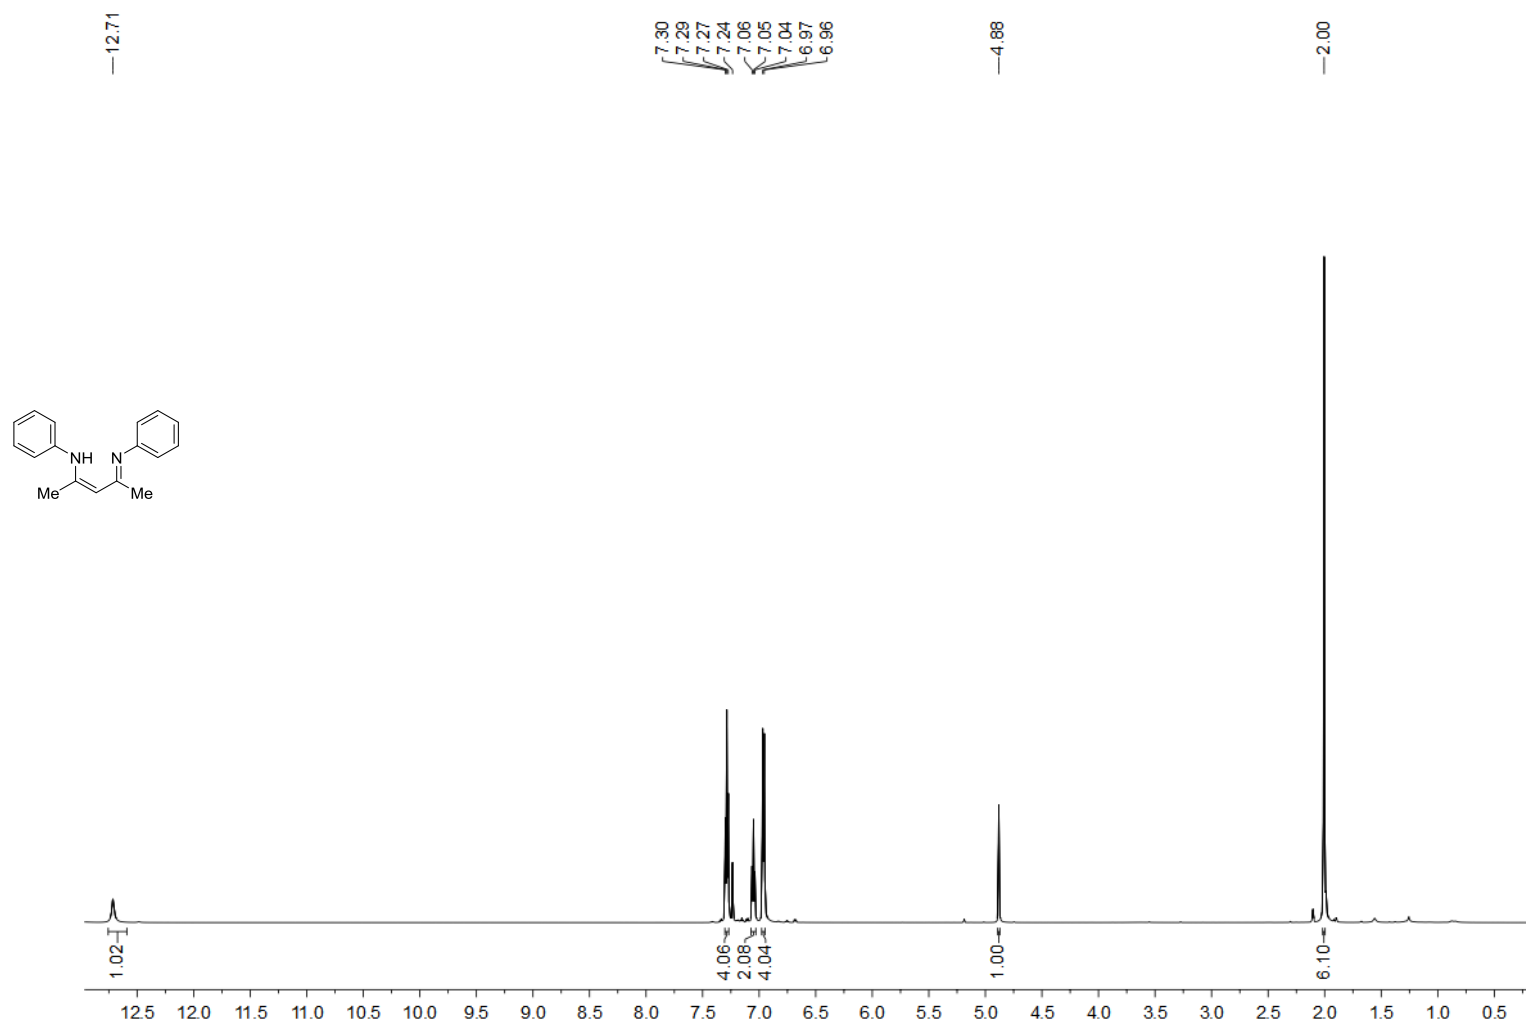

**Figure S110.** <sup>1</sup>H NMR (600 MHz, CDCl<sub>3</sub>) spectra of compound **13**

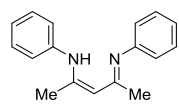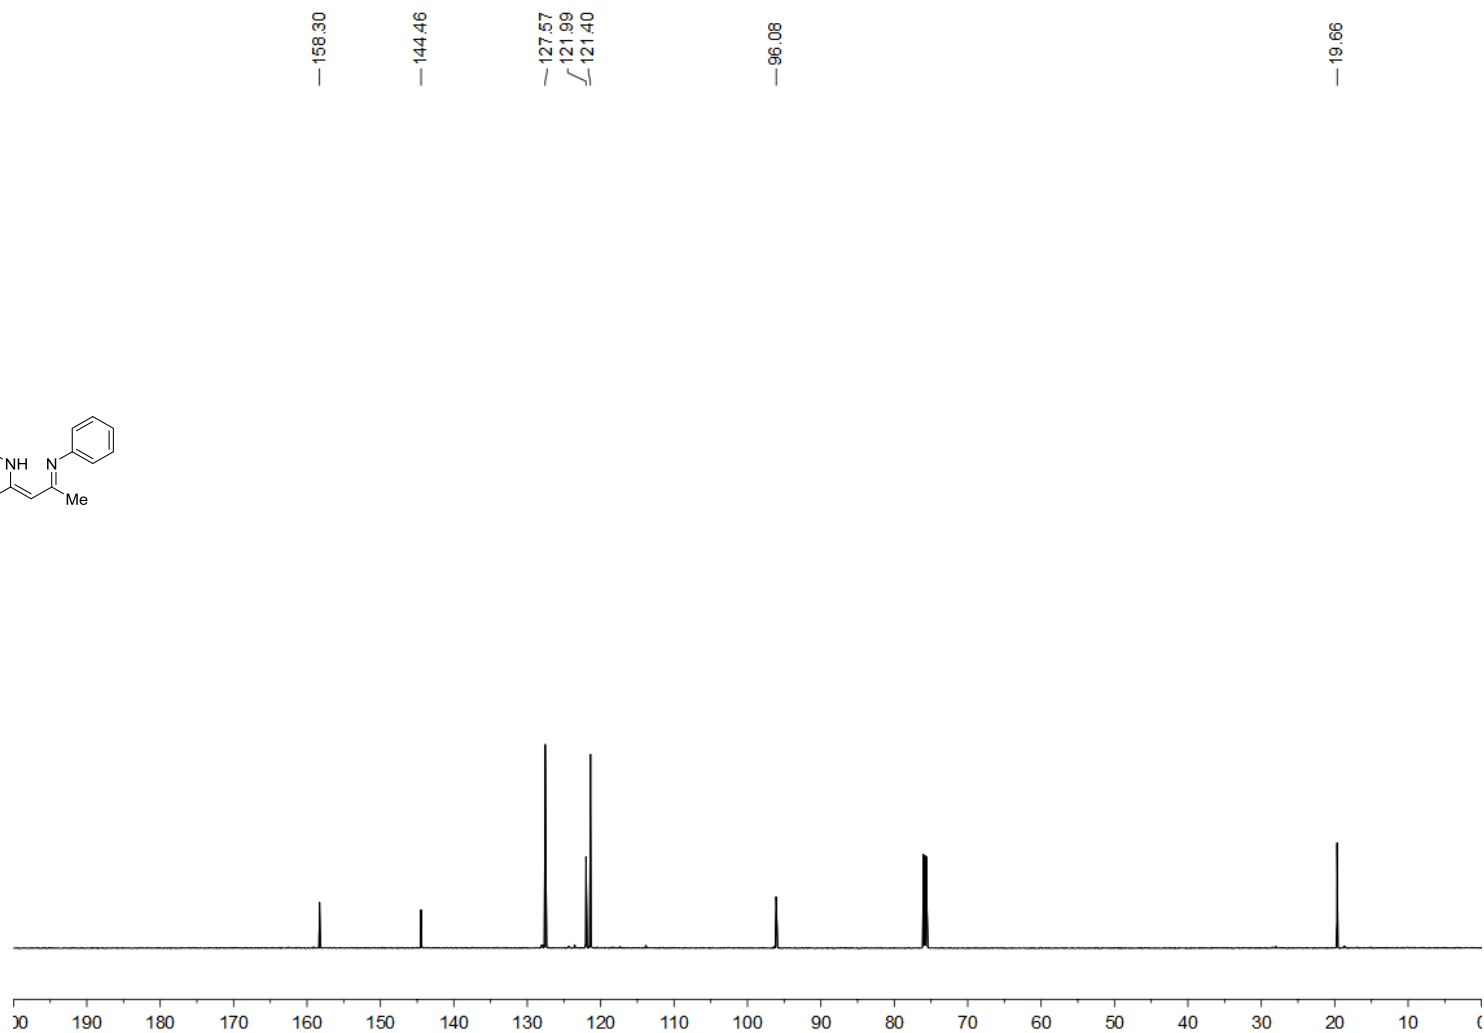

**Figure S11.**  $^{13}\text{C}$  NMR (150 MHz,  $\text{CDCl}_3$ ) spectra of compound **13**

42 #62 RT: 0.97 AV: 1 NL: 1.26E7  
T: FTMS + c ESI Full ms [100.00-1000.00]

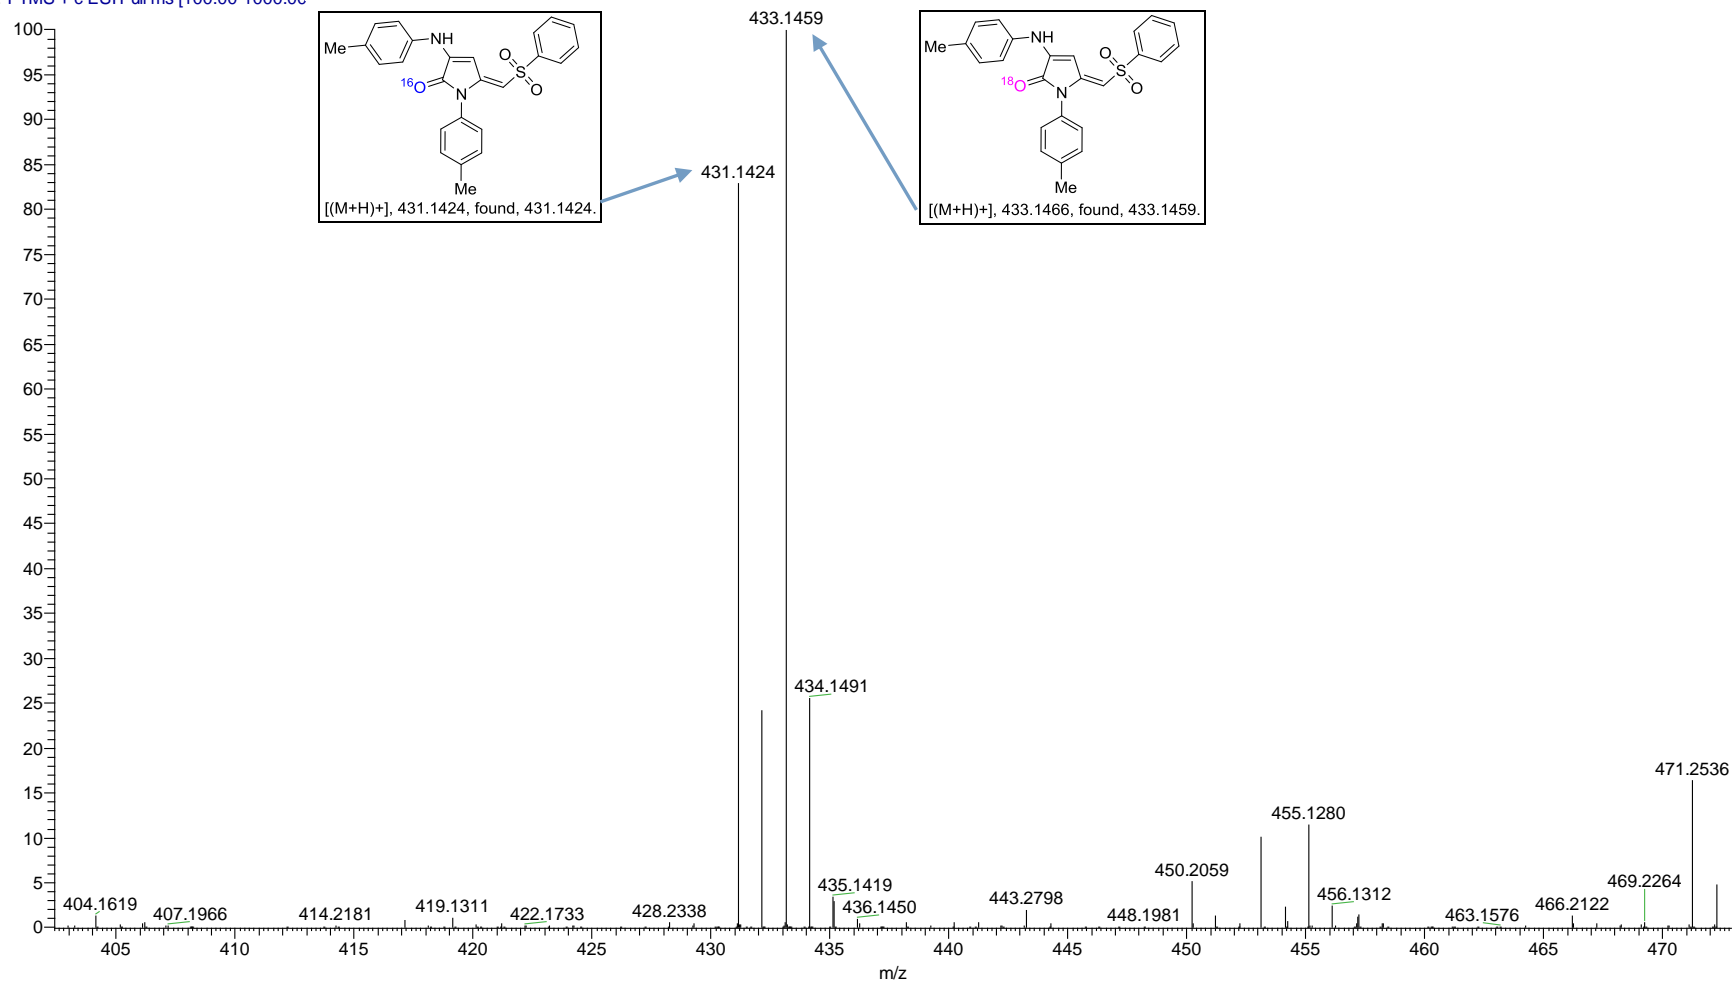

Figure S112. HRMS spectrum of compound 4a/4a-O<sup>18</sup>

## 8. References and notes.

1. Puente, Á.; Ofial, A. R.; Mayr, H. Nucleophilic reactivities of bis-acceptor-substituted benzyl anions. *Eur. J. Org. Chem.* **2017**, 1196.
2. Lee, D.-H.; Taher, A.; Hossain, S.; Jin, M.-J. An efficient and general method for the Heck and Buchwald–Hartwig coupling reactions of aryl chlorides. *Org. Lett.*, **2011**, *13*, 5540.
3. CCDC 2145010 contain the supplementary crystallographic data for compound **4a**. These data can be obtained free of charge from The Cambridge Crystallographic Data Center via [www.ccdc.cam.ac.uk/data\\_request/cif](http://www.ccdc.cam.ac.uk/data_request/cif).
